# Supplementary material for: Ground motion prediction maps using seismic-microzonation data and machine learning
Source: Copernicus journal article supplement (doi:10.5194/nhess-22-947-2022), 2022-03-22
Supplement: Supplementary file 1 [file DATASET.xlsx]

## Sheet: Foglio1
event_id	ev_nation_	ev_latitud	ev_longitu	station_co	st_latitud	st_longitu	vs30_m_sec	vs30_meas_	fm_type_co	H	M	R	vs30	h	hx	hy	hxx	hyy	LOGPGA	LOGPGV	LOG03	LOG1	LOG3
AL-2016-0003	GR	41.0713	22.6802	KBN	40.6232	20.7874	742	MASW	U	10	4.4	166.822	742	904	-0.0647	0.02283	-6e-05	6e-05	-1.12206	-1.97635	-0.809689	-0.679017	-1.70422
AL-2016-0004	GR	39.752	20.696	DURR	41.3199	19.4573	202	MASW	U	14.6	4	203.349	202	2	0.00681	0.00027	-1e-05	0	-0.91424	-2.02508	-0.464941	-0.728186	-1.51283
AL-2016-0004	GR	39.752	20.696	FIER	40.7174	19.5669	374	MASW	U	14.6	4	143.907	374	14	0.00976	0.00824	0	-2e-05	-0.792296	-2.0141	-0.183309	-0.961488	-1.78907
AL-2016-0004	GR	39.752	20.696	KBN	40.6232	20.7874	742	MASW	U	14.6	4	97.1836	742	904	-0.0647	0.02283	-6e-05	6e-05	-1.12393	-2.26193	-0.587156	-1.24469	-2.17694
AL-2016-0004	GR	39.752	20.696	POGR	40.8996	20.679	352	MASW	U	14.6	4	127.615	352	698	0.0057	0.01054	0	-1e-05	-0.462579	-1.52808	0.0327211	-0.437882	-1.65408
AL-2016-0004	GR	39.752	20.696	TPE	40.2948	20.0155	686	MASW	U	14.6	4	83.6689	686	206	0.05734	0.0847	-0.00022	-1e-05	-0.421898	-1.86576	-0.161688	-0.718703	-1.89438
AL-2016-0004	GR	39.752	20.696	VLO	40.4704	19.4965	375	MASW	U	14.6	4	129.561	375	39	-0.04404	-0.00932	1e-05	1e-05	-0.411504	-1.71462	-0.054332	-0.827357	-1.80104
AL-2016-0011	GR	40.7425	21.182	DURR	41.3199	19.4573	202	MASW	U	10.38	3.9	158.271	202	2	0.00681	0.00027	-1e-05	0	-0.598762	-1.6037	-0.123145	-0.600011	-1.34103
AL-2016-0011	GR	40.7425	21.182	FIER	40.7174	19.5669	374	MASW	U	10.38	3.9	136.12	374	14	0.00976	0.00824	0	-2e-05	-0.799285	-2.01196	-0.247356	-0.932945	-1.84137
AL-2016-0011	GR	40.7425	21.182	KBN	40.6232	20.7874	742	MASW	U	10.38	3.9	35.8205	742	904	-0.0647	0.02283	-6e-05	6e-05	0.117794	-1.46995	0.367612	-0.804464	-1.78397
AL-2016-0011	GR	40.7425	21.182	LACI	41.6359	19.7199	1490	MASW	U	10.38	3.9	157.594	1490	83	-0.12818	0.01567	-0.00013	-3e-05	-1.53895	-2.70747	-0.910155	-1.46429	-2.47224
AL-2016-0011	GR	40.7425	21.182	TIR1	41.3357	19.8078	311	MASW	U	10.38	3.9	132.792	311	96	-0.01093	0.00203	0	0	-0.707754	-1.84064	-0.136299	-0.849277	-1.81889
AL-2016-0011	GR	40.7425	21.182	TPE	40.2948	20.0155	686	MASW	U	10.38	3.9	110.457	686	206	0.05734	0.0847	-0.00022	-1e-05	-1.09564	-2.30508	-0.763866	-1.07072	-2.30622
AL-2016-0011	GR	40.7425	21.182	VLO	40.4704	19.4965	375	MASW	U	10.38	3.9	145.467	375	39	-0.04404	-0.00932	1e-05	1e-05	-0.689693	-1.87044	-0.216029	-0.652074	-1.92937
AL-2016-0013	GR	38.1924	20.307	FIER	40.7174	19.5669	374	MASW	U	20.64	4.5	287.864	374	14	0.00976	0.00824	0	-2e-05	-0.963886	-1.90777	-0.529657	-0.708568	-1.47653
AL-2016-0013	GR	38.1924	20.307	KBN	40.6232	20.7874	742	MASW	U	20.64	4.5	273.424	742	904	-0.0647	0.02283	-6e-05	6e-05	-1.52457	-2.47382	-1.14554	-1.23932	-2.07062
EMSC-19980501_0000001	GR	37.4525	20.7895	GTH1	36.7608	22.5661			SS	26.8	5.3	175.311	545.274	25	0.04183	0.03501	4e-05	-0.00011	1.33147	0.0242078	1.5524	1.19572	0.322492
EMSC-19981006_0000006	GR	37.2473	21.1688	KYP1	37.2527	21.6658	641	CH	TF	24.4	5.4	43.9901	641	12	-0.01792	0.02352	-1e-05	-2e-05	1.95007	0.424508	2.0406	1.21693	0.134641
EMSC-20050730_0000059	TR	39.4128	33.0975	ANTO	39.868	32.7934			SS	15.6687	5.25	56.921	612.65	1055	-0.02595	0.06809	3e-05	-4e-05	0.754689	-0.613187	1.047	0.357177	-0.310689
EMSC-20050731_0000059	TR	39.4255	33.1341	ANTO	39.868	32.7934			SS	2	4.18	57.2006	612.65	1055	-0.02595	0.06809	3e-05	-4e-05	-0.304127	-1.77196	-0.0158229	-0.792393	-1.88544
EMSC-20050731_0000085	TR	39.4244	33.0781	ANTO	39.868	32.7934			SS	11.6813	4.58	55.0204	612.65	1055	-0.02595	0.06809	3e-05	-4e-05	0.106374	-1.31994	0.280767	-0.581037	-1.60283
EMSC-20050731_0000109	TR	39.443	33.0789	ANTO	39.868	32.7934			SS	11.4689	4.84	53.204	612.65	1055	-0.02595	0.06809	3e-05	-4e-05	0.784023	-0.653655	0.901234	0.0231696	-0.947656
EMSC-20050801_0000058	TR	39.4562	33.0651	ANTO	39.868	32.7934			SS	19.2608	4.66	51.3579	612.65	1055	-0.02595	0.06809	3e-05	-4e-05	0.349505	-1.17266	0.422975	-0.323984	-1.30154
EMSC-20050806_0000068	TR	39.3856	33.0984	ANTO	39.868	32.7934			SS	6	4.68	59.6625	612.65	1055	-0.02595	0.06809	3e-05	-4e-05	0.318651	-1.13954	0.46942	-0.412894	-1.46906
EMSC-20090406_0000100	IT	42.356	13.383	GUMA	43.0627	13.3352			NF	9	4.1	78.6784	452.586	588.328	-0.08895	-0.04543	0.00181	0.00548	-0.0562203	-1.38472	0.43685	-0.390906	-1.34313
EMSC-20090406_0000100	IT	42.356	13.383	RM02	42.343	13.3283			NF	9	4.1	4.72187	458.029	793.289	0.05471	-0.0644	0.00044	-0.00045	1.62564	0.145097	1.88112	0.660311	-0.268585
EMSC-20090406_0000100	IT	42.356	13.383	RM06	42.3775	13.2438			NF	9	4.1	11.6833	462.805	867.965	-0.06766	0.23758	-0.00162	-0.00579	1.30363	-0.0875067	1.64597	0.459925	-0.489923
EMSC-20090406_0000100	IT	42.356	13.383	SENI	43.7052	13.2331			NF	9	4.1	150.518	210.954	6.66	-0.00458	0.02909	-0.0003	5e-05	-0.171915	-1.38964	0.56302	-0.430711	-1.30606
EMSC-20090406_0000100	IT	42.356	13.383	AQU	42.3539	13.4019			NF	9	4.1	1.57327	454.648	732.678	-0.01658	0.03493	-0.00083	0.00301	1.74693	0.164077	1.69656	1.0492	0.0507414
EMSC-20100808_0000008	GR	34.8541	24.4912	IACM	35.3058	25.0709			NF	23.565	4.86	72.8376	395.328	66	-0.00016	0.02528	-0.00012	-1e-05	0.769426	-0.391741	1.38143	0.785789	-0.496256
EMSC-20101003_0000034	GR	34.9716	26.5146	KARP	35.5472	27.1612			NF	16.9101	5.08	86.851	883.296	416	0.15252	-0.10626	5e-05	0.0001	0.804654	-0.345319	1.14439	0.699165	-0.491294
EMSC-20101003_0000034	GR	34.9716	26.5146	IACM	35.3058	25.0709			NF	16.9101	5.08	136.434	395.328	66	-0.00016	0.02528	-0.00012	-1e-05	0.350494	-0.626971	0.902856	0.669242	-0.528418
EMSC-20101003_0000034	GR	34.9716	26.5146	KARP	35.5471	27.1611			NF	16.9101	5.08	86.8343	883.296	416	0.15252	-0.10626	5e-05	0.0001	0.795735	-0.358168	1.13549	0.690158	-0.503524
EMSC-20101111_0000038	TR	37.8633	27.3734	KARP	35.5472	27.1612			NF	14.0477	4.6	258.232	883.296	416	0.15252	-0.10626	5e-05	0.0001	-1.49941	-2.33789	-1.25908	-1.27533	-1.78284
EMSC-20101114_0000105	TR	36.563	35.9986	CSS	34.9611	33.331			NF	16.7011	4.9	299.414	380.496	378	0.00263	0.0219	1e-05	0	-1.32805	-2.20236	-0.928277	-1.03038	-1.90161
EMSC-20101226_0000016	TR	40.3222	25.8821	ALNA	39.148	23.8667			SS	12.702	4.47	216.198	604.69	8	0.03835	-0.03635	-5e-05	-6e-05	-1.2694	-2.23917	-0.881754	-0.897703	-2.17192
EMSC-20101226_0000016	TR	40.3222	25.8821	EFSA	39.5401	24.9886			SS	12.702	4.47	115.609	477.937	20	-0.02705	0.04364	-2e-05	-7e-05	-0.161669	-1.55728	0.17708	-0.648218	-1.70446
EMSC-20101226_0000016	TR	40.3222	25.8821	PSRA	38.5398	25.562			SS	12.702	4.47	200.093	600	11	-0.00241	-0.0154	5e-05	-2e-05	-0.437648	-1.72717	0.0319952	-0.987188	-2.09471
EMSC-20110120_0000002	TR	40.7342	29.7731	GONE	40.0466	27.686			SS	12.4508	4.15	192.58	440.139	144	-0.03639	0.04445	-0.00014	-2e-05	-0.370216	-1.86739	-0.255223	-0.832124	-1.97573
EMSC-20110506_0000042	IT	37.804	14.943	CAR1	39.2534	16.2114			TF	20.35	4.3	195.31	419.207	628.92	0.02635	-0.18406	0.00291	0.00193	-1.08325	-2.35283	-0.802307	-1.20006	-2.39761
EMSC-20110506_0000042	IT	37.804	14.943	ECHR	37.6863	14.9129			TF	20.35	4.3	13.3526	421.45	1115.37	-0.10069	-0.07386	-0.0018	-0.00138	0.520774	-0.867832	0.940104	0.119501	-0.840941
EMSC-20110506_0000042	IT	37.804	14.943	ENIC	37.6314	15.0216			TF	20.35	4.3	20.3995	421.45	834.706	0.01799	-0.04822	0.0011	0.00104	0.507058	-0.961856	0.863447	-0.241176	-1.30494
EMSC-20110506_0000042	IT	37.804	14.943	EVRN	37.6892	15.1356			TF	20.35	4.3	21.2066	460.817	351.521	0.00709	0.11715	-0.00103	-0.00024	0.488971	-0.895732	0.986617	-0.0498955	-1.09759
EMSC-20110506_0000042	IT	37.804	14.943	HVZN	37.1783	14.7155			TF	20.35	4.3	72.412	459.151	715.582	0.04231	0.03455	0.00288	-0.00147	-0.129949	-1.3778	0.41752	-0.279589	-1.3964
EMSC-20110506_0000042	IT	37.804	14.943	ILLI	38.4457	14.9483			TF	20.35	4.3	71.3553	402.117	219.117	-0.04865	-0.0134	0.00507	0.01347	-0.248318	-1.30762	0.194881	-0.136372	-1.07441
EMSC-20110506_0000042	IT	37.804	14.943	IVPL	38.3763	14.9801			TF	20.35	4.3	63.7196	391.754	420.363	0.07606	-0.06618	0.00197	0.00604	-0.15049	-1.36147	0.231096	-0.311497	-1.41171
EMSC-20110506_0000042	IT	37.804	14.943	SSY	37.1577	15.0737			TF	20.35	4.3	72.7848	550.375	538.114	0.05055	-0.03343	-0.00025	-0.00058	0.0637029	-1.35256	0.360377	-0.347715	-1.45148
EMSC-20110508_0000014	GR	36.6752	27.2161	KARP	35.5472	27.1612			NF	17.1669	5.1	125.525	883.296	416	0.15252	-0.10626	5e-05	0.0001	-0.14279	-1.21331	0.147172	-0.217883	-0.787782
EMSC-20110508_0000014	GR	36.6752	27.2161	IACM	35.3058	25.0709			NF	17.1669	5.1	245.825	395.328	66	-0.00016	0.02528	-0.00012	-1e-05	-0.266632	-1.14382	0.215278	0.244732	-0.839658
EMSC-20110508_0000014	GR	36.6752	27.2161	KARP	35.5471	27.1611			NF	17.1669	5.1	125.536	883.296	416	0.15252	-0.10626	5e-05	0.0001	-0.151588	-1.22706	0.138268	-0.227777	-0.803341
EMSC-20110508_0000014	GR	36.6752	27.2161	KSL	36.1503	29.5856			NF	17.1669	5.1	219.916	557.733	102	0.0315	0.04718	0.00018	-5e-05	-1.1125	-1.52517	-0.824644	-0.708439	-0.795558
EMSC-20110508_0000014	GR	36.6752	27.2161	SIVA	35.0175	24.81			NF	17.1669	5.1	284.608	383.53	85	-0.00016	0.02501	-2e-05	1e-05	-1.01604	-1.75716	-0.546973	-0.693697	-1.21164
EMSC-20110508_0000014	GR	36.6752	27.2161	DIDI	37.3767	27.2398			NF	17.1669	5.1	78.0316	315.946	47	-0.01473	0.00554	0	3e-05	1.5706	0.360826	2.08877	1.60437	0.592037
EMSC-20110508_0000014	GR	36.6752	27.2161	FETI	36.6903	29.0968			NF	17.1669	5.1	167.714	461.789	12	-0.01796	-0.0169	-2e-05	-2e-05	0.0353676	-0.864744	0.33522	0.197437	-0.390796
EMSC-20110508_0000014	GR	36.6752	27.2161	YKAV	37.1246	27.2801			NF	17.1669	5.1	50.294	461.977	23	0.02211	-0.02852	1e-05	-1e-05	1.73477	0.42993	2.11855	1.07106	0.217007
EMSC-20110519_0000052	TR	39.1277	29.0701	PSRA	38.5398	25.562			NF	11.743	5.8	310.791	600	11	-0.00241	-0.0154	5e-05	-2e-05	-0.166101	-1.03037	0.220309	-0.11212	-0.508756
EMSC-20110519_0000052	TR	39.1277	29.0701	ENZZ	40.607	26.1406			NF	11.743	5.8	299.25	377.603	9	0.01099	-0.01243	-2e-05	-2e-05	1.31178	0.48372	1.70495	1.72135	0.977122
EMSC-20110519_0000052	TR	39.1277	29.0701	FETI	36.6903	29.0968			NF	11.743	5.8	271.037	461.789	12	-0.01796	-0.0169	-2e-05	-2e-05	0.189102	-0.315959	0.295648	0.805118	0.239439
EMSC-20110519_0000052	TR	39.1277	29.0701	YKAV	37.1246	27.2801			NF	11.743	5.8	272.247	461.977	23	0.02211	-0.02852	1e-05	-1e-05	0.31715	-0.060249	0.439198	0.722854	0.358032
EMSC-20110519_0000060	TR	39.1061	29.0419	GONE	40.0466	27.686			NF	8.6818	4.61	156.333	440.139	144	-0.03639	0.04445	-0.00014	-2e-05	0.58265	-0.543341	0.874087	0.521874	-0.632816
EMSC-20110520_0000010	TR	39.1073	29.0823	GONE	40.0466	27.686			NF	4.2257	4.47	158.835	440.139	144	-0.03639	0.04445	-0.00014	-2e-05	0.523125	-0.87023	0.554173	0.127912	-0.849311
EMSC-20110527_0000067	GR	35.7647	23.4719	ANKY	35.867	23.3012			NF	15.4531	4.2	19.1438	619.572	100	-0.0098	0.05556	-0.00012	-3e-05	1.12787	-0.124996	1.43828	0.832624	-0.355713
EMSC-20110527_0000067	GR	35.7647	23.4719	GVD	34.8391	24.0874			NF	15.4531	4.2	117.096	669.155	186	0.07511	0.04868	-4e-05	1e-05	-0.0746753	-1.37867	0.444735	-0.418853	-1.51412
EMSC-20110527_0000067	GR	35.7647	23.4719	IACM	35.3058	25.0709			NF	15.4531	4.2	153.419	395.328	66	-0.00016	0.02528	-0.00012	-1e-05	0.384947	-0.84048	0.910074	0.320631	-1.07136
EMSC-20110527_0000067	GR	35.7647	23.4719	MNVA	36.6871	23.0373			NF	15.4531	4.2	109.722	883.644	11	0.09264	0.03325	-0.00021	-4e-05	-0.605195	-1.90395	-0.0377294	-0.861063	-1.86727
EMSC-20110527_0000067	GR	35.7647	23.4719	SIVA	35.0175	24.81			NF	15.4531	4.2	147.02	383.53	85	-0.00016	0.02501	-2e-05	1e-05	-0.1616	-1.36399	0.339552	-0.105479	-1.33374
EMSC-20110528_0000020	TR	39.1327	28.9954	PSRA	38.5398	25.562			NF	13.3279	4.8	304.58	600	11	-0.00241	-0.0154	5e-05	-2e-05	-0.931798	-2.19159	-0.476616	-1.29331	-1.53761
EMSC-20110528_0000020	TR	39.1327	28.9954	SMTH	40.4709	25.5304			NF	13.3279	4.8	331.264	900	356	-0.27133	-0.01567	-0.00034	0.00014	-1.06307	-2.25492	-0.756044	-1.15432	-1.79189
EMSC-20110528_0000020	TR	39.1327	28.9954	KIYI	41.4844	28.3			NF	13.3279	4.8	268.06	600	1	0.00449	0.00797	-2e-05	-1e-05	0.519051	-0.726691	1.07165	0.332683	-0.568976
EMSC-20110528_0000020	TR	39.1327	28.9954	YKAV	37.1246	27.2801			NF	13.3279	4.8	269.002	461.977	23	0.02211	-0.02852	1e-05	-1e-05	-0.582094	-1.19337	-0.380951	-0.194794	-0.644787
EMSC-20110601_0000047	GR	36.3409	22.2566	ANKY	35.867	23.3012			TF	11	4.55	107.623	619.572	100	-0.0098	0.05556	-0.00012	-3e-05	-0.275199	-1.36803	-0.0194832	-0.297111	-1.41752
EMSC-20110601_0000047	GR	36.3409	22.2566	MNVA	36.6871	23.0373			TF	11	4.55	79.6877	883.644	11	0.09264	0.03325	-0.00021	-4e-05	-0.798141	-1.95229	-0.347937	-0.67068	-1.84682
EMSC-20110627_0000061	TR	39.1371	29.0366	GONE	40.0466	27.686			NF	12.6504	4.7	153.687	440.139	144	-0.03639	0.04445	-0.00014	-2e-05	0.968668	-0.447094	1.10586	0.488079	-0.401943
EMSC-20110711_0000044	TR	40.1811	29.9579	GONE	40.0466	27.686			NF	12.3431	4.51	193.771	440.139	144	-0.03639	0.04445	-0.00014	-2e-05	0.0848152	-1.2212	0.381333	-0.107848	-1.1176
EMSC-20110725_0000047	TR	40.8244	27.7474	EFSA	39.5401	24.9886			NF	12.2162	5.09	274.421	477.937	20	-0.02705	0.04364	-2e-05	-7e-05	-1.01142	-1.84041	-0.59634	-0.675002	-1.24877
EMSC-20110725_0000047	TR	40.8244	27.7474	LIA	39.8972	25.1806			NF	12.2162	5.09	240.669	464.17	45	0.04683	-0.0177	-3e-05	-1e-05	-0.91044	-1.87502	-0.411437	-0.736494	-1.59365
EMSC-20110725_0000047	TR	40.8244	27.7474	PSRA	38.5398	25.562			NF	12.2162	5.09	315.427	600	11	-0.00241	-0.0154	5e-05	-2e-05	-0.785699	-2.01766	-0.406589	-0.822281	-1.6173
EMSC-20110725_0000047	TR	40.8244	27.7474	SMTH	40.4709	25.5304			NF	12.2162	5.09	191.116	900	356	-0.27133	-0.01567	-0.00034	0.00014	-0.437057	-1.54227	-0.0576072	-0.29468	-1.33758
EMSC-20110725_0000047	TR	40.8244	27.7474	GONE	40.0466	27.686			NF	12.2162	5.09	86.6434	440.139	144	-0.03639	0.04445	-0.00014	-2e-05	1.00287	-0.0726549	1.38065	1.04856	-0.144568
EMSC-20110727_0000037	TR	38.3052	31.8703	ANTO	39.868	32.7934			NF	7.9028	4.84	191.166	612.65	1055	-0.02595	0.06809	3e-05	-4e-05	-0.613393	-1.59615	-0.364291	-0.402879	-1.27052
EMSC-20110910_0000003	GR	36.8413	26.57	KARP	35.5472	27.1612			NF	5.391	4.52	153.364	883.296	416	0.15252	-0.10626	5e-05	0.0001	-0.800234	-1.93901	-0.474822	-0.616414	-1.83855
EMSC-20110910_0000003	GR	36.8413	26.57	IACM	35.3058	25.0709			NF	5.391	4.52	217.489	395.328	66	-0.00016	0.02528	-0.00012	-1e-05	-0.559779	-1.54615	-0.0440687	-0.242089	-1.39597
EMSC-20110910_0000003	GR	36.8413	26.57	KARP	35.5471	27.1611			NF	5.391	4.52	153.371	883.296	416	0.15252	-0.10626	5e-05	0.0001	-0.809141	-1.94795	-0.48373	-0.625324	-1.84746
EMSC-20110910_0000003	GR	36.8413	26.57	PSRA	38.5398	25.562			NF	5.391	4.52	208.648	600	11	-0.00241	-0.0154	5e-05	-2e-05	-1.21635	-2.41869	-0.883346	-1.56059	-2.06013
EMSC-20110910_0000003	GR	36.8413	26.57	ZKR	35.1147	26.217			NF	5.391	4.52	194.599	745.462	201	0.10514	-0.01014	-0.00019	-4e-05	-1.01065	-2.0173	-0.577659	-0.747622	-1.51481
EMSC-20110910_0000021	GR	36.8502	26.5766	KARP	35.5472	27.1612			SS	12.1793	4.29	154.09	883.296	416	0.15252	-0.10626	5e-05	0.0001	-0.93911	-2.16422	-0.556346	-0.981759	-2.30502
EMSC-20110910_0000021	GR	36.8502	26.5766	KARP	35.5471	27.1611			SS	12.1793	4.29	154.096	883.296	416	0.15252	-0.10626	5e-05	0.0001	-0.948181	-2.16946	-0.565201	-0.990475	-2.29295
EMSC-20110910_0000021	GR	36.8502	26.5766	PSRA	38.5398	25.562			SS	12.1793	4.29	207.999	600	11	-0.00241	-0.0154	5e-05	-2e-05	-1.18315	-2.6715	-0.893149	-1.93279	-2.72086
EMSC-20110910_0000021	GR	36.8502	26.5766	ZKR	35.1147	26.217			SS	12.1793	4.29	195.672	745.462	201	0.10514	-0.01014	-0.00019	-4e-05	-1.25779	-2.32989	-0.827901	-1.05335	-1.9474
EMSC-20111004_0000023	GR	39.17	21.6003	ALNA	39.148	23.8667			NF	9.3801	4.39	195.419	604.69	8	0.03835	-0.03635	-5e-05	-6e-05	-1.25975	-2.18752	-0.960687	-0.893197	-1.95641
EMSC-20111004_0000023	GR	39.17	21.6003	DLFA	38.4784	22.4956			NF	9.3801	4.39	109.224	900	511	-0.01822	-0.37187	0.00018	-0.00012	-0.423665	-2.01765	-0.321997	-0.895698	-1.96522
EMSC-20111004_0000023	GR	39.17	21.6003	JAN	39.6562	20.8487			NF	9.3801	4.39	84.2072	435.911	515	0.01206	-0.02499	3e-05	1e-05	-0.0262315	-1.44772	0.421148	-0.688903	-1.65284
EMSC-20111004_0000023	GR	39.17	21.6003	KASA	39.7463	19.9354			NF	9.3801	4.39	156.637	900	41	0.09573	-0.04553	-0.00012	1e-05	-0.75231	-1.86197	-0.182611	-0.828744	-1.86531
EMSC-20111004_0000023	GR	39.17	21.6003	PLG	40.3733	23.4444			NF	9.3801	4.39	206.733	493.142	535	-0.05298	-0.01891	-1e-05	-1e-05	-1.36211	-2.58063	-0.897968	-1.35079	-2.25517
EMSC-20111010_0000051	GR	37.195	22.0494	ANKY	35.867	23.3012			NF	13.9905	4.83	185.234	619.572	100	-0.0098	0.05556	-0.00012	-3e-05	-1.00159	-1.84089	-0.681161	-0.640975	-1.47555
EMSC-20111010_0000051	GR	37.195	22.0494	DLFA	38.4784	22.4956			NF	13.9905	4.83	147.987	900	511	-0.01822	-0.37187	0.00018	-0.00012	-1.02404	-2.01475	-0.644457	-0.970592	-1.51865
EMSC-20111010_0000051	GR	37.195	22.0494	MNVA	36.6871	23.0373			NF	13.9905	4.83	104.396	883.644	11	0.09264	0.03325	-0.00021	-4e-05	-0.797957	-1.61516	-0.522974	-0.43273	-1.26413
EMSC-20111010_0000051	GR	37.195	22.0494	NOAC	37.9738	23.7177			NF	13.9905	4.83	170.612	434.005	96	-0.02322	0.00027	5e-05	6e-05	-0.820399	-1.60759	-0.547777	-0.43103	-1.32752
EMSC-20111023_0000031	TR	38.7294	43.4465	GNI	40.148	44.741			TF	7.5565	7.3	192.972	733.137	1556	0.00299	-0.09929	-6e-05	-7e-05	1.08841	0.628409	1.13507	1.43997	1.30731
EMSC-20111025_0000150	TR	38.8119	43.6215	GNI	40.148	44.741			TF	13.2899	5.3	176.925	733.137	1556	0.00299	-0.09929	-6e-05	-7e-05	-0.0346529	-0.655676	0.0951745	0.672869	-0.127362
EMSC-20111029_0000165	TR	38.8451	43.5411	GNI	40.148	44.741			SS	7.3993	5.06	177.729	733.137	1556	0.00299	-0.09929	-6e-05	-7e-05	-0.455803	-1.15547	-0.361308	0.12274	-0.693232
EMSC-20111102_0000023	TR	38.804	43.5544	GNI	40.148	44.741			U	5.8688	5.3	180.846	733.137	1556	0.00299	-0.09929	-6e-05	-7e-05	-1.04119	-1.85964	-0.949772	-0.487339	-1.29353
EMSC-20111106_0000021	TR	38.9016	43.5267	GNI	40.148	44.741			SS	0.1224	4.76	173.361	733.137	1556	0.00299	-0.09929	-6e-05	-7e-05	-0.897127	-1.69516	-0.720381	-0.652754	-1.17299
EMSC-20111106_0000130	GR	35.7875	25.6947	ANKY	35.867	23.3012			NF	27.4814	4.69	215.965	619.572	100	-0.0098	0.05556	-0.00012	-3e-05	-0.498493	-1.78579	-0.00200535	-0.76007	-1.46093
EMSC-20111106_0000130	GR	35.7875	25.6947	GVD	34.8391	24.0874			NF	27.4814	4.69	179.967	669.155	186	0.07511	0.04868	-4e-05	1e-05	-0.196419	-1.44802	0.264486	-0.368647	-1.58486
EMSC-20111106_0000130	GR	35.7875	25.6947	IACM	35.3058	25.0709			NF	27.4814	4.69	77.8076	395.328	66	-0.00016	0.02528	-0.00012	-1e-05	1.12916	-0.307093	1.6116	0.664871	-0.553591
EMSC-20111106_0000130	GR	35.7875	25.6947	SIVA	35.0175	24.81			NF	27.4814	4.69	117.309	383.53	85	-0.00016	0.02501	-2e-05	1e-05	0.520904	-0.834833	0.836925	0.132425	-1.09244
EMSC-20111106_0000130	GR	35.7875	25.6947	ZKR	35.1147	26.217			NF	27.4814	4.69	88.5156	745.462	201	0.10514	-0.01014	-0.00019	-4e-05	0.243218	-1.05512	0.601718	0.0256555	-1.1378
EMSC-20111108_0000104	TR	38.6996	43.1012	GNI	40.148	44.741			TF	11.9379	5.2	213.948	733.137	1556	0.00299	-0.09929	-6e-05	-7e-05	-0.44764	-1.18747	-0.372711	0.060134	-0.543594
EMSC-20111109_0000075	TR	38.4207	43.3376	GNI	40.148	44.741			SS	9.127	5.6	226.882	733.137	1556	0.00299	-0.09929	-6e-05	-7e-05	-0.131942	-0.713775	-0.0963543	0.344506	0.201651
EMSC-20111110_0000081	GR	38.4115	21.8352	KER02	38.1663	20.5105			NF	13.2034	4.68	118.787	600	27	-0.0344	-0.03932	2e-05	-6e-05	0.69367	-0.520762	1.12996	0.580802	-0.608745
EMSC-20111110_0000081	GR	38.4115	21.8352	ALNA	39.148	23.8667			NF	13.2034	4.68	194.203	604.69	8	0.03835	-0.03635	-5e-05	-6e-05	-1.0723	-2.1143	-0.813054	-0.918371	-1.93266
EMSC-20111110_0000081	GR	38.4115	21.8352	DLFA	38.4784	22.4956			NF	13.2034	4.68	57.9945	900	511	-0.01822	-0.37187	0.00018	-0.00012	0.226084	-1.29359	0.289534	-0.203773	-1.38103
EMSC-20111110_0000081	GR	38.4115	21.8352	JAN	39.6562	20.8487			NF	13.2034	4.68	162.522	435.911	515	0.01206	-0.02499	3e-05	1e-05	-0.800003	-1.7757	-0.408707	-0.445716	-1.54386
EMSC-20111110_0000081	GR	38.4115	21.8352	KASA	39.7463	19.9354			NF	13.2034	4.68	221.168	900	41	0.09573	-0.04553	-0.00012	1e-05	-1.29372	-2.29379	-0.754547	-0.995008	-1.88781
EMSC-20111110_0000081	GR	38.4115	21.8352	MNVA	36.6871	23.0373			NF	13.2034	4.68	219.079	883.644	11	0.09264	0.03325	-0.00021	-4e-05	-1.30941	-2.12247	-0.889704	-0.907858	-1.91935
EMSC-20111110_0000081	GR	38.4115	21.8352	NOAC	37.9738	23.7177			NF	13.2034	4.68	171.556	434.005	96	-0.02322	0.00027	5e-05	6e-05	-0.599794	-1.64219	-0.0962699	-0.360404	-1.65144
EMSC-20111110_0000081	GR	38.4115	21.8352	YDRA	37.3495	23.4653			NF	13.2034	4.68	185.503	693.523	86	-0.04435	0.15921	8e-05	-0.0002	-0.644469	-1.67038	-0.184404	-0.485971	-1.62858
EMSC-20111114_0000088	TR	38.6907	43.1163	GNI	40.148	44.741			TF	12.6981	5.21	213.851	733.137	1556	0.00299	-0.09929	-6e-05	-7e-05	-1.02502	-1.62349	-0.862954	-0.442134	-1.04335
EMSC-20111117_0000070	TR	38.8762	43.5029	GNI	40.148	44.741			U	4.8455	4.7	176.857	733.137	1556	0.00299	-0.09929	-6e-05	-7e-05	-1.28161	-2.05279	-0.878423	-0.760815	-1.63571
EMSC-20111118_0000069	TR	38.8125	43.8343	GNI	40.148	44.741			SS	7.365	4.95	167.652	733.137	1556	0.00299	-0.09929	-6e-05	-7e-05	-0.849831	-1.53114	-0.695024	-0.367141	-0.891361
EMSC-20111122_0000084	TR	38.9031	43.5365	GNI	40.148	44.741			U	10.9125	4.4	172.723	733.137	1556	0.00299	-0.09929	-6e-05	-7e-05	-0.983292	-1.88195	-0.641875	-0.694272	-1.6724
EMSC-20111130_0000004	TR	38.4929	43.3458	GNI	40.148	44.741			SS	10.4673	4.9	219.707	733.137	1556	0.00299	-0.09929	-6e-05	-7e-05	-1.12414	-1.67586	-1.02165	-0.530504	-0.981204
EMSC-20111203_0000005	TR	38.7754	43.9773	GNI	40.148	44.741			U	3.24	4.9	166.11	733.137	1556	0.00299	-0.09929	-6e-05	-7e-05	-1.16668	-1.97946	-1.04141	-0.718353	-1.33853
EMSC-20111206_0000008	TR	38.8282	43.5888	GNI	40.148	44.741			U	4.539	5.2	176.952	733.137	1556	0.00299	-0.09929	-6e-05	-7e-05	-1.18332	-1.90238	-1.02443	-0.607654	-1.30688
EMSC-20111210_0000017	TR	39.0482	43.4544	GNI	40.148	44.741			U	8.0995	4.8	164.639	733.137	1556	0.00299	-0.09929	-6e-05	-7e-05	-1.4265	-2.21024	-1.21597	-1.03165	-1.77553
EMSC-20120126_0000013	GR	36.0468	25.0538	ANKY	35.867	23.3012			SS	21.9227	5.2	159.009	619.572	100	-0.0098	0.05556	-0.00012	-3e-05	0.0683823	-0.960589	0.553755	0.223618	-0.486107
EMSC-20120126_0000013	GR	36.0468	25.0538	GVD	34.8391	24.0874			SS	21.9227	5.2	160.301	669.155	186	0.07511	0.04868	-4e-05	1e-05	0.224583	-0.924138	0.7467	0.172569	-0.61995
EMSC-20120126_0000013	GR	36.0468	25.0538	IACM	35.3058	25.0709			SS	21.9227	5.2	82.4099	395.328	66	-0.00016	0.02528	-0.00012	-1e-05	1.26198	0.004881	1.84183	1.0649	0.0197734
EMSC-20120126_0000013	GR	36.0468	25.0538	ITM	37.1787	21.9252			SS	21.9227	5.2	306.273	844.349	512	-0.01976	-0.08096	0.00025	3e-05	-1.11536	-1.8229	-0.771677	-0.794726	-1.27204
EMSC-20120126_0000013	GR	36.0468	25.0538	KARP	35.5471	27.1611			SS	21.9227	5.2	198.004	883.296	416	0.15252	-0.10626	5e-05	0.0001	-0.458862	-1.47542	-0.10095	-0.435252	-1.13003
EMSC-20120126_0000013	GR	36.0468	25.0538	MNVA	36.6871	23.0373			SS	21.9227	5.2	194.075	883.644	11	0.09264	0.03325	-0.00021	-4e-05	-0.502781	-1.3859	-0.0786946	-0.195644	-0.796642
EMSC-20120126_0000013	GR	36.0468	25.0538	NOAC	37.9738	23.7177			SS	21.9227	5.2	244.92	434.005	96	-0.02322	0.00027	5e-05	6e-05	-0.834257	-1.81236	-0.353404	-0.588791	-1.29318
EMSC-20120126_0000013	GR	36.0468	25.0538	PSRA	38.5398	25.562			SS	21.9227	5.2	280.827	600	11	-0.00241	-0.0154	5e-05	-2e-05	-0.698359	-1.87238	-0.31299	-1.06535	-1.39095
EMSC-20120126_0000013	GR	36.0468	25.0538	SIVA	35.0175	24.81			SS	21.9227	5.2	116.565	383.53	85	-0.00016	0.02501	-2e-05	1e-05	0.931347	-0.341349	1.33366	0.744379	-0.468232
EMSC-20120126_0000013	GR	36.0468	25.0538	YDRA	37.3495	23.4653			SS	21.9227	5.2	202.574	693.523	86	-0.04435	0.15921	8e-05	-0.0002	-0.609156	-1.46494	-0.184847	-0.420546	-1.16039
EMSC-20120126_0000013	GR	36.0468	25.0538	ZKR	35.1147	26.217			SS	21.9227	5.2	147.672	745.462	201	0.10514	-0.01014	-0.00019	-4e-05	0.12665	-0.97789	0.477425	0.272522	-0.86333
EMSC-20120126_0000013	GR	36.0468	25.0538	CESE	38.3306	26.2997			SS	21.9227	5.2	276.885	409.533	15	-0.01939	-0.00824	2e-05	-3e-05	-0.702579	-1.30886	-0.256022	-0.425504	-0.83939
EMSC-20120126_0000013	GR	36.0468	25.0538	DATC	36.7584	27.6602			SS	21.9227	5.2	246.31	436.096	82	0.02251	-0.00919	3e-05	4e-05	-0.341212	-1.01839	0.0202033	0.0923779	-0.631623
EMSC-20120126_0000013	GR	36.0468	25.0538	FOCM	38.7131	26.7309			SS	21.9227	5.2	331.432	553.331	7	-0.0426	-0.00284	-0.0001	1e-05	-0.653089	-1.32517	-0.229199	-0.442254	-0.522856
EMSC-20120126_0000013	GR	36.0468	25.0538	GMLD	38.0764	26.8747			SS	21.9227	5.2	277.542	506.73	140	-0.02582	-0.03851	2e-05	1e-05	0.11896	-1.01661	0.515971	-0.0376217	-0.810669
EMSC-20120126_0000013	GR	36.0468	25.0538	KRBN	38.5936	26.5537			SS	21.9227	5.2	312.699	843.228	94	0.08041	0.05121	1e-05	8e-05	-0.3427	-1.16325	0.0688953	-0.0883187	-0.619705
EMSC-20120126_0000013	GR	36.0468	25.0538	MRSB	36.7161	28.1969			SS	21.9227	5.2	291.035	732.254	433	0.02065	0.05366	0.00022	-0.00037	-0.36592	-1.51341	0.159867	-0.568446	-1.08967
EMSC-20120127_0000012	GR	36.0558	25.0866	ANKY	35.867	23.3012			SS	18.5051	5.39	162.056	619.572	100	-0.0098	0.05556	-0.00012	-3e-05	0.250023	-0.842246	0.697311	0.398024	-0.321719
EMSC-20120127_0000012	GR	36.0558	25.0866	GVD	34.8391	24.0874			SS	18.5051	5.39	162.771	669.155	186	0.07511	0.04868	-4e-05	1e-05	0.54286	-0.539399	1.05571	0.655912	-0.246663
EMSC-20120127_0000012	GR	36.0558	25.0866	IACM	35.3058	25.0709			SS	18.5051	5.39	83.4082	395.328	66	-0.00016	0.02528	-0.00012	-1e-05	1.43862	0.154928	1.80737	1.37659	0.248046
EMSC-20120127_0000012	GR	36.0558	25.0866	ITM	37.1787	21.9252			SS	18.5051	5.39	308.522	844.349	512	-0.01976	-0.08096	0.00025	3e-05	-1.09314	-1.5305	-0.583842	-0.725841	-1.00074
EMSC-20120127_0000012	GR	36.0558	25.0866	MNVA	36.6871	23.0373			SS	18.5051	5.39	196.441	883.644	11	0.09264	0.03325	-0.00021	-4e-05	-0.489933	-1.25171	0.164198	-0.30374	-0.646253
EMSC-20120127_0000012	GR	36.0558	25.0866	NOAC	37.9738	23.7177			SS	18.5051	5.39	245.47	434.005	96	-0.02322	0.00027	5e-05	6e-05	-0.853757	-1.76404	-0.458195	-0.694889	-1.22235
EMSC-20120127_0000012	GR	36.0558	25.0866	PSRA	38.5398	25.562			SS	18.5051	5.39	279.388	600	11	-0.00241	-0.0154	5e-05	-2e-05	-0.687994	-1.86829	-0.348924	-0.993737	-1.41566
EMSC-20120127_0000012	GR	36.0558	25.0866	SIVA	35.0175	24.81			SS	18.5051	5.39	118.14	383.53	85	-0.00016	0.02501	-2e-05	1e-05	1.05708	-0.15986	1.45331	0.895364	-0.187667
EMSC-20120127_0000012	GR	36.0558	25.0866	YDRA	37.3495	23.4653			SS	18.5051	5.39	203.916	693.523	86	-0.04435	0.15921	8e-05	-0.0002	-0.495787	-1.43265	-0.0456293	-0.425263	-1.05449
EMSC-20120127_0000012	GR	36.0558	25.0866	ZKR	35.1147	26.217			SS	18.5051	5.39	146.285	745.462	201	0.10514	-0.01014	-0.00019	-4e-05	0.0328502	-1.05507	0.455355	-0.0195714	-0.582885
EMSC-20120127_0000012	GR	36.0558	25.0866	CESE	38.3306	26.2997			SS	18.5051	5.39	274.816	409.533	15	-0.01939	-0.00824	2e-05	-3e-05	-0.415306	-1.22966	-0.270163	-0.399444	-0.712251
EMSC-20120127_0000012	GR	36.0558	25.0866	DIDI	37.3767	27.2398			SS	18.5051	5.39	241.665	315.946	47	-0.01473	0.00554	0	3e-05	-0.133258	-0.824865	0.399825	0.133216	-0.146322
EMSC-20120127_0000012	GR	36.0558	25.0866	GMLD	38.0764	26.8747			SS	18.5051	5.39	275.035	506.73	140	-0.02582	-0.03851	2e-05	1e-05	-0.0410993	-1.07101	0.445791	0.00421136	-0.703179
EMSC-20120127_0000012	GR	36.0558	25.0866	MRSB	36.7161	28.1969			SS	18.5051	5.39	287.925	732.254	433	0.02065	0.05366	0.00022	-0.00037	-0.339721	-1.29786	0.108796	-0.564837	-0.866344
EMSC-20120127_0000012	GR	36.0558	25.0866	YKAV	37.1246	27.2801			SS	18.5051	5.39	229.067	461.977	23	0.02211	-0.02852	1e-05	-1e-05	-0.503139	-1.23519	-0.145496	-0.181757	-0.730041
EMSC-20120127_0000128	GR	36.0438	25.0913	ANKY	35.867	23.3012			NF	27.5584	4.44	162.32	619.572	100	-0.0098	0.05556	-0.00012	-3e-05	-0.92204	-2.16561	-0.533367	-1.15079	-1.76713
EMSC-20120127_0000128	GR	36.0438	25.0913	GVD	34.8391	24.0874			NF	27.5584	4.44	161.906	669.155	186	0.07511	0.04868	-4e-05	1e-05	-0.949324	-2.26602	-0.444856	-1.14771	-2.12844
EMSC-20120127_0000128	GR	36.0438	25.0913	IACM	35.3058	25.0709			NF	27.5584	4.44	82.0825	395.328	66	-0.00016	0.02528	-0.00012	-1e-05	0.333408	-1.03983	0.669241	0.259156	-1.06614
EMSC-20120127_0000128	GR	36.0438	25.0913	KARP	35.5471	27.1611			NF	27.5584	4.44	194.669	883.296	416	0.15252	-0.10626	5e-05	0.0001	-1.14301	-2.21684	-0.665679	-1.12879	-2.07788
EMSC-20120127_0000128	GR	36.0438	25.0913	MNVA	36.6871	23.0373			NF	27.5584	4.44	197.327	883.644	11	0.09264	0.03325	-0.00021	-4e-05	-1.4973	-2.55082	-1.05174	-1.5338	-2.11367
EMSC-20120127_0000128	GR	36.0438	25.0913	SIVA	35.0175	24.81			NF	27.5584	4.44	116.929	383.53	85	-0.00016	0.02501	-2e-05	1e-05	-0.215686	-1.49687	0.141855	-0.391979	-1.66439
EMSC-20120127_0000128	GR	36.0438	25.0913	ZKR	35.1147	26.217			NF	27.5584	4.44	145.04	745.462	201	0.10514	-0.01014	-0.00019	-4e-05	-0.623626	-1.85216	-0.243076	-0.747506	-1.91092
EMSC-20120128_0000058	GR	36.0378	25.0435	ANKY	35.867	23.3012			NF	24.3389	4.73	157.975	619.572	100	-0.0098	0.05556	-0.00012	-3e-05	-0.359904	-1.54227	0.149955	-0.466585	-1.07465
EMSC-20120128_0000058	GR	36.0378	25.0435	GVD	34.8391	24.0874			NF	24.3389	4.73	158.956	669.155	186	0.07511	0.04868	-4e-05	1e-05	-0.403038	-1.60516	0.189245	-0.572175	-1.54963
EMSC-20120128_0000058	GR	36.0378	25.0435	IACM	35.3058	25.0709			NF	24.3389	4.73	81.4323	395.328	66	-0.00016	0.02528	-0.00012	-1e-05	0.599482	-0.704576	0.98567	0.472511	-0.707575
EMSC-20120128_0000058	GR	36.0378	25.0435	KARP	35.5471	27.1611			NF	24.3389	4.73	198.629	883.296	416	0.15252	-0.10626	5e-05	0.0001	-0.807428	-2.0977	-0.504515	-0.954735	-1.78783
EMSC-20120128_0000058	GR	36.0378	25.0435	MNVA	36.6871	23.0373			NF	24.3389	4.73	193.598	883.644	11	0.09264	0.03325	-0.00021	-4e-05	-0.890357	-1.97683	-0.536635	-0.964835	-1.56904
EMSC-20120128_0000058	GR	36.0378	25.0435	SIVA	35.0175	24.81			NF	24.3389	4.73	115.408	383.53	85	-0.00016	0.02501	-2e-05	1e-05	0.191792	-1.03259	0.439336	-0.0253061	-1.17329
EMSC-20120128_0000058	GR	36.0378	25.0435	ZKR	35.1147	26.217			NF	24.3389	4.73	147.644	745.462	201	0.10514	-0.01014	-0.00019	-4e-05	-0.501713	-1.68593	-0.0683055	-0.465458	-1.50604
EMSC-20120129_0000053	GR	36.0477	25.0487	ANKY	35.867	23.3012			NF	19.6211	4.74	158.566	619.572	100	-0.0098	0.05556	-0.00012	-3e-05	-1.04974	-2.25641	-0.439735	-1.16485	-1.67952
EMSC-20120129_0000053	GR	36.0477	25.0487	GVD	34.8391	24.0874			NF	19.6211	4.74	160.133	669.155	186	0.07511	0.04868	-4e-05	1e-05	-0.906331	-2.2279	-0.431735	-1.22985	-2.00727
EMSC-20120129_0000053	GR	36.0477	25.0487	IACM	35.3058	25.0709			NF	19.6211	4.74	82.5199	395.328	66	-0.00016	0.02528	-0.00012	-1e-05	0.396705	-1.09098	0.699389	0.160972	-1.12654
EMSC-20120129_0000053	GR	36.0477	25.0487	KARP	35.5471	27.1611			NF	19.6211	4.74	198.472	883.296	416	0.15252	-0.10626	5e-05	0.0001	-1.0022	-1.96793	-0.684472	-0.616942	-1.64257
EMSC-20120129_0000053	GR	36.0477	25.0487	MNVA	36.6871	23.0373			NF	19.6211	4.74	193.613	883.644	11	0.09264	0.03325	-0.00021	-4e-05	-1.55221	-2.52116	-1.05238	-1.63534	-2.1377
EMSC-20120129_0000053	GR	36.0477	25.0487	SIVA	35.0175	24.81			NF	19.6211	4.74	116.577	383.53	85	-0.00016	0.02501	-2e-05	1e-05	-0.226762	-1.55524	0.0676391	-0.41673	-1.60559
EMSC-20120129_0000053	GR	36.0477	25.0487	ZKR	35.1147	26.217			NF	19.6211	4.74	148.071	745.462	201	0.10514	-0.01014	-0.00019	-4e-05	-0.656663	-1.80093	-0.255461	-0.553357	-1.58328
EMSC-20120129_0000053	GR	36.0477	25.0487	GMLD	38.0764	26.8747			NF	19.6211	4.74	277.724	506.73	140	-0.02582	-0.03851	2e-05	1e-05	-1.09914	-2.19676	-0.603437	-1.1702	-2.19659
EMSC-20120214_0000005	GR	40.1465	24.0754	TRIZ	38.3654	22.0727			NF	12.4265	5.19	262.578	600	16	-0.00292	-0.015	3e-05	0	-0.992259	-1.80358	-0.523844	-0.726556	-1.1001
EMSC-20120214_0000005	GR	40.1465	24.0754	ALNA	39.148	23.8667			NF	12.4265	5.19	112.452	604.69	8	0.03835	-0.03635	-5e-05	-6e-05	0.184278	-0.671768	0.541884	0.609306	-0.360498
EMSC-20120214_0000005	GR	40.1465	24.0754	DLFA	38.4784	22.4956			NF	12.4265	5.19	229.94	900	511	-0.01822	-0.37187	0.00018	-0.00012	-1.00017	-1.79605	-0.508183	-0.733334	-1.05534
EMSC-20120214_0000005	GR	40.1465	24.0754	EFSA	39.5401	24.9886			NF	12.4265	5.19	103.076	477.937	20	-0.02705	0.04364	-2e-05	-7e-05	0.0262927	-0.893655	0.473958	0.134015	-0.415047
EMSC-20120214_0000005	GR	40.1465	24.0754	JAN	39.6562	20.8487			NF	12.4265	5.19	280.576	435.911	515	0.01206	-0.02499	3e-05	1e-05	-0.927216	-1.76886	-0.386819	-0.661898	-1.1003
EMSC-20120214_0000005	GR	40.1465	24.0754	LIA	39.8972	25.1806			NF	12.4265	5.19	98.1024	464.17	45	0.04683	-0.0177	-3e-05	-1e-05	0.319566	-0.749873	0.585932	0.365611	-0.609001
EMSC-20120214_0000005	GR	40.1465	24.0754	MGNA	38.6561	20.7912			NF	12.4265	5.19	327.223	411.497	65	0.03929	0.00081	-1e-05	8e-05	-1.42365	-1.89366	-1.04109	-1.13066	-1.38316
EMSC-20120214_0000005	GR	40.1465	24.0754	NOAC	37.9738	23.7177			NF	12.4265	5.19	243.554	434.005	96	-0.02322	0.00027	5e-05	6e-05	-0.799942	-1.5287	-0.240541	-0.435765	-0.644018
EMSC-20120214_0000005	GR	40.1465	24.0754	PLG	40.3733	23.4444			NF	12.4265	5.19	59.182	493.142	535	-0.05298	-0.01891	-1e-05	-1e-05	0.588911	-0.618816	0.895097	0.50089	0.00179253
EMSC-20120214_0000005	GR	40.1465	24.0754	PSRA	38.5398	25.562			NF	12.4265	5.19	219.679	600	11	-0.00241	-0.0154	5e-05	-2e-05	-0.723558	-1.64645	-0.235256	-0.630612	-1.12205
EMSC-20120214_0000005	GR	40.1465	24.0754	SMTH	40.4709	25.5304			NF	12.4265	5.19	128.544	900	356	-0.27133	-0.01567	-0.00034	0.00014	-0.136581	-1.2672	0.100354	-0.2507	-1.01968
EMSC-20120214_0000005	GR	40.1465	24.0754	YDRA	37.3495	23.4653			NF	12.4265	5.19	315.481	693.523	86	-0.04435	0.15921	8e-05	-0.0002	-0.962337	-1.62335	-0.592893	-0.485006	-0.924802
EMSC-20120214_0000005	GR	40.1465	24.0754	FOCM	38.7131	26.7309			NF	12.4265	5.19	278.226	553.331	7	-0.0426	-0.00284	-0.0001	1e-05	-0.533842	-1.34469	-0.0652566	-0.260541	-0.683339
EMSC-20120214_0000005	GR	40.1465	24.0754	GOKC	40.1998	25.9183			NF	12.4265	5.19	156.689	629.889	143	-0.10552	0.02364	-6e-05	-3e-05	0.568475	-0.532944	1.04065	0.659218	-0.232318
EMSC-20120214_0000005	GR	40.1465	24.0754	GONE	40.0466	27.686			NF	12.4265	5.19	307.296	440.139	144	-0.03639	0.04445	-0.00014	-2e-05	-0.322912	-0.984111	-0.0781319	0.211302	-0.476065
EMSC-20120214_0000005	GR	40.1465	24.0754	KRBN	38.5936	26.5537			NF	12.4265	5.19	274.208	843.228	94	0.08041	0.05121	1e-05	8e-05	-0.371379	-1.20675	-0.188275	-0.0476577	-0.647725
EMSC-20120222_0000004	GR	37.4316	21.6313	TRIZ	38.3654	22.0727			NF	16.447	4.33	110.825	600	16	-0.00292	-0.015	3e-05	0	-0.173969	-1.4059	0.405484	-0.303538	-1.56236
EMSC-20120222_0000004	GR	37.4316	21.6313	DLFA	38.4784	22.4956			NF	16.447	4.33	138.89	900	511	-0.01822	-0.37187	0.00018	-0.00012	-1.07075	-2.28849	-0.525607	-1.16907	-2.28129
EMSC-20120222_0000004	GR	37.4316	21.6313	ITM	37.1787	21.9252			NF	16.447	4.33	38.2946	844.349	512	-0.01976	-0.08096	0.00025	3e-05	0.0313054	-1.51024	0.0935008	-0.482697	-1.46247
EMSC-20120222_0000004	GR	37.4316	21.6313	MGNA	38.6561	20.7912			NF	16.447	4.33	154.758	411.497	65	0.03929	0.00081	-1e-05	8e-05	-0.75502	-2.04461	-0.270346	-1.03296	-2.1672
EMSC-20120222_0000004	GR	37.4316	21.6313	MNVA	36.6871	23.0373			NF	16.447	4.33	149.729	883.644	11	0.09264	0.03325	-0.00021	-4e-05	-1.53465	-2.48211	-1.28831	-1.23946	-2.2052
EMSC-20120222_0000004	GR	37.4316	21.6313	NOAC	37.9738	23.7177			NF	16.447	4.33	193.196	434.005	96	-0.02322	0.00027	5e-05	6e-05	-1.25279	-2.36389	-0.866532	-1.12436	-2.29415
EMSC-20120222_0000004	GR	37.4316	21.6313	YDRA	37.3495	23.4653			NF	16.447	4.33	162.28	693.523	86	-0.04435	0.15921	8e-05	-0.0002	-1.27582	-2.27839	-0.846703	-1.01435	-2.0979
EMSC-20120304_0000006	GR	40.1696	24.0348	TRIZ	38.3654	22.0727			NF	7.7682	5.2	262.237	600	16	-0.00292	-0.015	3e-05	0	-1.11577	-1.81608	-0.749332	-0.77475	-0.979249
EMSC-20120304_0000006	GR	40.1696	24.0348	ALNA	39.148	23.8667			NF	7.7682	5.2	114.5	604.69	8	0.03835	-0.03635	-5e-05	-6e-05	-0.219055	-1.00213	0.125822	0.187307	-0.449479
EMSC-20120304_0000006	GR	40.1696	24.0348	DLFA	38.4784	22.4956			NF	7.7682	5.2	229.976	900	511	-0.01822	-0.37187	0.00018	-0.00012	-1.2063	-1.80199	-0.689004	-0.878793	-1.02792
EMSC-20120304_0000006	GR	40.1696	24.0348	EFSA	39.5401	24.9886			NF	7.7682	5.2	107.368	477.937	20	-0.02705	0.04364	-2e-05	-7e-05	-0.411583	-1.31785	0.0793448	-0.314034	-0.699784
EMSC-20120304_0000006	GR	40.1696	24.0348	JAN	39.6562	20.8487			NF	7.7682	5.2	277.651	435.911	515	0.01206	-0.02499	3e-05	1e-05	-1.06724	-1.62002	-0.644302	-0.761892	-0.816549
EMSC-20120304_0000006	GR	40.1696	24.0348	LIA	39.8972	25.1806			NF	7.7682	5.2	102.139	464.17	45	0.04683	-0.0177	-3e-05	-1e-05	0.120293	-0.954965	0.400962	0.127897	-0.858954
EMSC-20120304_0000006	GR	40.1696	24.0348	MGNA	38.6561	20.7912			NF	7.7682	5.2	325.501	411.497	65	0.03929	0.00081	-1e-05	8e-05	-1.56359	-1.93736	-1.22589	-1.26145	-1.27214
EMSC-20120304_0000006	GR	40.1696	24.0348	NOAC	37.9738	23.7177			NF	7.7682	5.2	245.687	434.005	96	-0.02322	0.00027	5e-05	6e-05	-1.06823	-1.65506	-0.734185	-0.742402	-0.730773
EMSC-20120304_0000006	GR	40.1696	24.0348	PLG	40.3733	23.4444			NF	7.7682	5.2	54.9697	493.142	535	-0.05298	-0.01891	-1e-05	-1e-05	0.677971	-0.472141	0.959999	0.421223	0.263998
EMSC-20120304_0000006	GR	40.1696	24.0348	PSRA	38.5398	25.562			NF	7.7682	5.2	223.79	600	11	-0.00241	-0.0154	5e-05	-2e-05	-1.15876	-1.88941	-0.635445	-1.13498	-1.29987
EMSC-20120304_0000006	GR	40.1696	24.0348	SMTH	40.4709	25.5304			NF	7.7682	5.2	131.151	900	356	-0.27133	-0.01567	-0.00034	0.00014	-0.354948	-1.5531	0.00565524	-0.563364	-1.09273
EMSC-20120304_0000006	GR	40.1696	24.0348	YDRA	37.3495	23.4653			NF	7.7682	5.2	317.446	693.523	86	-0.04435	0.15921	8e-05	-0.0002	-1.14728	-1.84897	-0.948215	-0.828851	-0.976481
EMSC-20120304_0000006	GR	40.1696	24.0348	GOKC	40.1998	25.9183			NF	7.7682	5.2	160.034	629.889	143	-0.10552	0.02364	-6e-05	-3e-05	0.392551	-0.720743	0.825953	0.434149	-0.352687
EMSC-20120308_0000015	GR	34.7157	23.9293	ANKY	35.867	23.3012			NF	31.5937	4.3	140.142	619.572	100	-0.0098	0.05556	-0.00012	-3e-05	-1.30345	-2.31755	-0.834556	-1.00093	-2.08745
EMSC-20120308_0000015	GR	34.7157	23.9293	GVD	34.8391	24.0874			NF	31.5937	4.3	19.9211	669.155	186	0.07511	0.04868	-4e-05	1e-05	1.45788	0.117016	1.88918	0.670706	-0.392303
EMSC-20120308_0000015	GR	34.7157	23.9293	IACM	35.3058	25.0709			NF	31.5937	4.3	122.942	395.328	66	-0.00016	0.02528	-0.00012	-1e-05	-0.351454	-1.45855	0.0690679	-0.122823	-1.45006
EMSC-20120308_0000015	GR	34.7157	23.9293	SIVA	35.0175	24.81			NF	31.5937	4.3	87.0706	383.53	85	-0.00016	0.02501	-2e-05	1e-05	-0.180308	-1.29942	0.226268	-0.223683	-1.51251
EMSC-20120308_0000015	GR	34.7157	23.9293	ZKR	35.1147	26.217			NF	31.5937	4.3	213.253	745.462	201	0.10514	-0.01014	-0.00019	-4e-05	-1.72538	-2.62389	-1.31244	-1.36321	-2.21315
EMSC-20120323_0000051	TR	38.9158	43.6453	GNI	40.148	44.741			U	1.8304	4.8	166.138	733.137	1556	0.00299	-0.09929	-6e-05	-7e-05	-1.13407	-1.94417	-0.958278	-0.684704	-1.53165
EMSC-20120323_0000051	TR	38.9158	43.6453	ERCV	39.0198	43.3381			U	1.8304	4.8	28.9671	343.689	1668	-0.01091	-0.00365	-2e-05	1e-05	1.45463	0.384974	1.99805	1.55441	0.553091
EMSC-20120325_0000016	GR	39.4437	20.4903	DLFA	38.4784	22.4956			NF	17.5248	4.57	203.914	900	511	-0.01822	-0.37187	0.00018	-0.00012	-1.36734	-2.17678	-1.1104	-0.959853	-1.83141
EMSC-20120325_0000016	GR	39.4437	20.4903	JAN	39.6562	20.8487			NF	17.5248	4.57	38.7632	435.911	515	0.01206	-0.02499	3e-05	1e-05	0.496166	-0.838162	0.835628	0.339665	-0.988079
EMSC-20120325_0000016	GR	39.4437	20.4903	KASA	39.7463	19.9354			NF	17.5248	4.57	58.2445	900	41	0.09573	-0.04553	-0.00012	1e-05	0.561872	-0.90083	0.922045	-0.149639	-1.08354
EMSC-20120325_0000016	GR	39.4437	20.4903	MGNA	38.6561	20.7912			NF	17.5248	4.57	91.3536	411.497	65	0.03929	0.00081	-1e-05	8e-05	-0.492762	-1.89839	-0.344465	-0.878168	-1.72558
EMSC-20120326_0000032	TR	39.1806	42.2886	GNI	40.148	44.741			TF	13.3996	5	235.863	733.137	1556	0.00299	-0.09929	-6e-05	-7e-05	-0.926449	-1.77901	-0.759944	-0.58904	-1.09415
EMSC-20120326_0000032	TR	39.1806	42.2886	ERCV	39.0198	43.3381			TF	13.3996	5	92.3112	343.689	1668	-0.01091	-0.00365	-2e-05	1e-05	1.06964	0.105209	1.43122	1.15382	0.589484
EMSC-20120326_0000032	TR	39.1806	42.2886	GUMT	40.4675	39.478			TF	13.3996	5	279.42	738.195	1437	-0.12222	-0.16142	0.0001	0.0001	-0.951442	-1.547	-0.669976	-0.554357	-0.815935
EMSC-20120331_0000020	TR	39.0364	43.8703	ERCV	39.0198	43.3381			U	1.0688	4.6	46.0086	343.689	1668	-0.01091	-0.00365	-2e-05	1e-05	0.631088	-0.385512	1.09446	0.711329	0.147952
EMSC-20120404_0000023	TR	38.8825	43.5828	GNI	40.148	44.741			U	5.8022	4.9	172.252	733.137	1556	0.00299	-0.09929	-6e-05	-7e-05	-1.06289	-1.90674	-0.816678	-0.650179	-1.40624
EMSC-20120404_0000023	TR	38.8825	43.5828	ERCV	39.0198	43.3381			U	5.8022	4.9	26.0929	343.689	1668	-0.01091	-0.00365	-2e-05	1e-05	1.69765	0.484747	2.24395	1.67304	0.672313
EMSC-20120413_0000001	TR	39.0126	44.1405	GNI	40.148	44.741			U	10	4.7	136.336	733.137	1556	0.00299	-0.09929	-6e-05	-7e-05	-1.03734	-1.98601	-0.756507	-0.675866	-1.63331
EMSC-20120413_0000001	TR	39.0126	44.1405	ERCV	39.0198	43.3381			U	10	4.7	69.3277	343.689	1668	-0.01091	-0.00365	-2e-05	1e-05	0.682842	-0.613755	1.13228	0.530049	-0.0869565
EMSC-20120413_0000010	TR	38.6735	43.2124	ERCV	39.0198	43.3381			TF	9.8697	4.5	40.0159	343.689	1668	-0.01091	-0.00365	-2e-05	1e-05	1.18918	-0.178634	1.60335	0.720448	-0.079691
EMSC-20120416_0000045	GR	36.719	21.6011	ANKY	35.867	23.3012			TF	30.0599	5.56	179.41	619.572	100	-0.0098	0.05556	-0.00012	-3e-05	-0.157134	-0.974975	0.192851	0.130028	-0.536308
EMSC-20120416_0000045	GR	36.719	21.6011	DLFA	38.4784	22.4956			TF	30.0599	5.56	210.908	900	511	-0.01822	-0.37187	0.00018	-0.00012	-0.789255	-1.59293	-0.484622	-0.387336	-1.07074
EMSC-20120416_0000045	GR	36.719	21.6011	GVD	34.8391	24.0874			TF	30.0599	5.56	306.569	669.155	186	0.07511	0.04868	-4e-05	1e-05	-0.41753	-1.55808	-0.0659397	-0.503917	-0.91489
EMSC-20120416_0000045	GR	36.719	21.6011	ITM	37.1787	21.9252			TF	30.0599	5.56	58.6744	844.349	512	-0.01976	-0.08096	0.00025	3e-05	0.656918	-0.555248	0.896037	0.31413	-0.346689
EMSC-20120416_0000045	GR	36.719	21.6011	JAN	39.6562	20.8487			TF	30.0599	5.56	333.147	435.911	515	0.01206	-0.02499	3e-05	1e-05	-0.823562	-1.69795	-0.434702	-0.682449	-1.13363
EMSC-20120416_0000045	GR	36.719	21.6011	MGNA	38.6561	20.7912			TF	30.0599	5.56	226.873	411.497	65	0.03929	0.00081	-1e-05	8e-05	-0.577013	-1.51961	-0.435463	-0.379739	-1.19854
EMSC-20120416_0000045	GR	36.719	21.6011	MNVA	36.6871	23.0373			TF	30.0599	5.56	128.089	883.644	11	0.09264	0.03325	-0.00021	-4e-05	-0.105372	-1.08299	0.394947	0.0995717	-0.619471
EMSC-20120416_0000045	GR	36.719	21.6011	NOAC	37.9738	23.7177			TF	30.0599	5.56	233.389	434.005	96	-0.02322	0.00027	5e-05	6e-05	-0.542587	-1.30006	-0.255647	-0.236006	-0.953598
EMSC-20120416_0000045	GR	36.719	21.6011	TNSA	37.5394	25.1631			TF	30.0599	5.56	328.671	498.109	10	-0.00543	-0.03838	0	-6e-05	-1.02559	-1.96595	-0.779168	-0.845108	-1.47462
EMSC-20120416_0000045	GR	36.719	21.6011	YDRA	37.3495	23.4653			TF	30.0599	5.56	179.707	693.523	86	-0.04435	0.15921	8e-05	-0.0002	-0.0633733	-0.992445	0.185341	0.211488	-0.446578
EMSC-20120418_0000102	TR	38.8804	43.5952	GNI	40.148	44.741			U	4.5399	4.9	171.834	733.137	1556	0.00299	-0.09929	-6e-05	-7e-05	-1.31594	-2.0086	-1.1834	-0.926618	-1.4968
EMSC-20120418_0000102	TR	38.8804	43.5952	ERCV	39.0198	43.3381			U	4.5399	4.9	27.1029	343.689	1668	-0.01091	-0.00365	-2e-05	1e-05	1.58233	0.323173	1.95324	1.31479	0.705993
EMSC-20120423_0000069	TR	39.1339	29.1294	ESKT	39.5212	30.8492			NF	1.0234	4.2	154.064	649.232	1204	-0.07431	0.07917	0.0004	0.00011	-0.0516663	-1.24962	0.4582	-0.38289	-1.29361
EMSC-20120423_0000069	TR	39.1339	29.1294	GONE	40.0466	27.686			NF	1.0234	4.2	159.988	440.139	144	-0.03639	0.04445	-0.00014	-2e-05	-0.0134746	-1.17232	0.175393	-0.00175417	-1.10469
EMSC-20120423_0000098	GR	34.9063	25.3607	ANKY	35.867	23.3012			TF	15	4.76	215.098	619.572	100	-0.0098	0.05556	-0.00012	-3e-05	-1.09469	-2.02009	-0.518008	-0.837234	-1.58511
EMSC-20120423_0000098	GR	34.9063	25.3607	GVD	34.8391	24.0874			TF	15	4.76	116.4	669.155	186	0.07511	0.04868	-4e-05	1e-05	-0.0707797	-1.31939	0.398801	-0.528122	-1.3808
EMSC-20120423_0000098	GR	34.9063	25.3607	IACM	35.3058	25.0709			TF	15	4.76	51.6557	395.328	66	-0.00016	0.02528	-0.00012	-1e-05	1.00474	-0.274626	1.63021	0.627327	-0.456114
EMSC-20120423_0000098	GR	34.9063	25.3607	KARP	35.5471	27.1611			TF	15	4.76	178.376	883.296	416	0.15252	-0.10626	5e-05	0.0001	-0.8046	-1.96179	-0.168899	-0.810086	-1.50261
EMSC-20120423_0000098	GR	34.9063	25.3607	SIVA	35.0175	24.81			TF	15	4.76	51.6874	383.53	85	-0.00016	0.02501	-2e-05	1e-05	0.79267	-0.577902	1.16271	0.112586	-0.763592
EMSC-20120423_0000098	GR	34.9063	25.3607	ZKR	35.1147	26.217			TF	15	4.76	81.3562	745.462	201	0.10514	-0.01014	-0.00019	-4e-05	0.467151	-0.889914	1.06458	-0.164141	-1.18835
EMSC-20120426_0000048	TR	39.1597	29.1088	ESKT	39.5212	30.8492			NF	8.2571	4.82	154.971	649.232	1204	-0.07431	0.07917	0.0004	0.00011	0.609088	-0.571636	1.10503	0.257014	-0.605382
EMSC-20120426_0000048	TR	39.1597	29.1088	FOCM	38.7131	26.7309			NF	8.2571	4.82	211.573	553.331	7	-0.0426	-0.00284	-0.0001	1e-05	-0.166668	-1.21238	0.236602	-0.254469	-0.949641
EMSC-20120426_0000048	TR	39.1597	29.1088	GONE	40.0466	27.686			NF	8.2571	4.82	156.79	440.139	144	-0.03639	0.04445	-0.00014	-2e-05	0.896444	-0.312176	1.08638	0.673006	-0.372602
EMSC-20120501_0000027	TR	38.6701	26.6784	EFSA	39.5401	24.9886			NF	12.557	4.81	174.975	477.937	20	-0.02705	0.04364	-2e-05	-7e-05	-0.807625	-1.6889	-0.32078	-0.395652	-1.32322
EMSC-20120501_0000027	TR	38.6701	26.6784	LIA	39.8972	25.1806			NF	12.557	4.81	187.713	464.17	45	0.04683	-0.0177	-3e-05	-1e-05	-0.80329	-1.78082	-0.362925	-0.689891	-1.40369
EMSC-20120501_0000027	TR	38.6701	26.6784	PSRA	38.5398	25.562			NF	12.557	4.81	98.0837	600	11	-0.00241	-0.0154	5e-05	-2e-05	0.688383	-0.827164	1.01375	-0.0255289	-1.27217
EMSC-20120501_0000027	TR	38.6701	26.6784	TNSA	37.5394	25.1631			NF	12.557	4.81	182.712	498.109	10	-0.00543	-0.03838	0	-6e-05	-0.462322	-1.59528	0.00654325	-0.490853	-1.26875
EMSC-20120501_0000027	TR	38.6701	26.6784	CAND	38.9542	26.8031			NF	12.557	4.81	33.387	567.667	60	-0.05347	-0.05797	7e-05	-1e-05	1.26822	0.0316662	1.61556	1.19008	0.154877
EMSC-20120503_0000062	TR	39.139	29.0914	PSRA	38.5398	25.562			NF	10.8541	5.2	312.836	600	11	-0.00241	-0.0154	5e-05	-2e-05	-0.98225	-2.11347	-0.500592	-1.07216	-1.71568
EMSC-20120503_0000062	TR	39.139	29.0914	CAND	38.9542	26.8031			NF	10.8541	5.2	198.673	567.667	60	-0.05347	-0.05797	7e-05	-1e-05	0.218787	-0.806748	0.693169	0.371963	-0.337004
EMSC-20120503_0000062	TR	39.139	29.0914	CESE	38.3306	26.2997			NF	10.8541	5.2	258.278	409.533	15	-0.01939	-0.00824	2e-05	-3e-05	-0.272691	-0.95465	-0.151308	0.113493	-0.554305
EMSC-20120503_0000062	TR	39.139	29.0914	DATC	36.7584	27.6602			NF	10.8541	5.2	292.94	436.096	82	0.02251	-0.00919	3e-05	4e-05	-0.190051	-0.81794	0.0293213	0.219759	-0.398234
EMSC-20120503_0000062	TR	39.139	29.0914	DEMR	36.2365	29.9056			NF	10.8541	5.2	330.595	861.281	250	0.0831	-0.16979	0	2e-05	-0.712881	-1.11711	-0.583012	-0.411663	-0.454829
EMSC-20120503_0000062	TR	39.139	29.0914	ENZZ	40.607	26.1406			NF	10.8541	5.2	300.068	377.603	9	0.01099	-0.01243	-2e-05	-2e-05	0.490771	-0.457403	0.821606	0.691345	-0.0941794
EMSC-20120503_0000062	TR	39.139	29.0914	ESKT	39.5212	30.8492			NF	10.8541	5.2	157.045	649.232	1204	-0.07431	0.07917	0.0004	0.00011	0.684007	-0.407682	1.27434	0.393205	-0.254514
EMSC-20120503_0000062	TR	39.139	29.0914	FOCM	38.7131	26.7309			NF	10.8541	5.2	209.608	553.331	7	-0.0426	-0.00284	-0.0001	1e-05	0.108141	-0.98074	0.562148	0.182647	-0.61374
EMSC-20120503_0000062	TR	39.139	29.0914	GMLD	38.0764	26.8747			NF	10.8541	5.2	225.955	506.73	140	-0.02582	-0.03851	2e-05	1e-05	0.593859	-0.531278	1.08386	0.472355	-0.445544
EMSC-20120503_0000062	TR	39.139	29.0914	GONE	40.0466	27.686			NF	10.8541	5.2	157.116	440.139	144	-0.03639	0.04445	-0.00014	-2e-05	1.1109	-0.225526	1.2626	0.946815	-0.00129516
EMSC-20120503_0000062	TR	39.139	29.0914	KRBN	38.5936	26.5537			NF	10.8541	5.2	227.916	843.228	94	0.08041	0.05121	1e-05	8e-05	0.120494	-0.773609	0.497864	0.530345	-0.47573
EMSC-20120503_0000062	TR	39.139	29.0914	MRSB	36.7161	28.1969			NF	10.8541	5.2	280.601	732.254	433	0.02065	0.05366	0.00022	-0.00037	-0.3937	-1.15164	0.00824697	-0.0923858	-0.629852
EMSC-20120503_0000062	TR	39.139	29.0914	YKAV	37.1246	27.2801			NF	10.8541	5.2	274.34	461.977	23	0.02211	-0.02852	1e-05	-1e-05	-0.363861	-0.998979	-0.194837	0.0432252	-0.568973
EMSC-20120526_0000036	GR	34.5686	24.6696	ANKY	35.867	23.3012			NF	23.9135	4.49	190.518	619.572	100	-0.0098	0.05556	-0.00012	-3e-05	-1.48949	-2.54386	-1.02113	-1.26582	-2.10495
EMSC-20120526_0000036	GR	34.5686	24.6696	GVD	34.8391	24.0874			NF	23.9135	4.49	61.1362	669.155	186	0.07511	0.04868	-4e-05	1e-05	0.190718	-1.08999	0.664178	-0.328583	-1.31892
EMSC-20120526_0000036	GR	34.5686	24.6696	IACM	35.3058	25.0709			NF	23.9135	4.49	89.7644	395.328	66	-0.00016	0.02528	-0.00012	-1e-05	-0.0719973	-1.22666	0.433055	-0.207798	-1.4861
EMSC-20120526_0000036	GR	34.5686	24.6696	SIVA	35.0175	24.81			NF	23.9135	4.49	51.5304	383.53	85	-0.00016	0.02501	-2e-05	1e-05	0.605378	-0.781885	0.861782	0.0836868	-1.0335
EMSC-20120526_0000036	GR	34.5686	24.6696	ZKR	35.1147	26.217			NF	23.9135	4.49	153.718	745.462	201	0.10514	-0.01014	-0.00019	-4e-05	-0.980386	-2.13232	-0.465685	-1.1191	-2.18633
EMSC-20120528_0000003	IT	39.8692	16.1022	ACER	40.7867	15.9427			NF	8.3	4.3	102.913	475.367	683.913	0.15668	0.38234	0.00385	0.00305	-0.439496	-1.3854	-0.0456317	-0.264777	-1.24401
EMSC-20120528_0000003	IT	39.8692	16.1022	BULG	40.0783	15.3776			NF	8.3	4.3	65.9777	428.356	848.675	0.0472	0.00361	0.00366	0.00531	-0.150942	-1.49712	0.261282	-0.56665	-1.17843
EMSC-20120528_0000003	IT	39.8692	16.1022	CAFE	41.028	15.2366			NF	8.3	4.3	148.214	411.579	1003.42	-0.11824	-0.01699	0.00242	0.00445	-1.19094	-2.11217	-0.574639	-0.986345	-1.37978
EMSC-20120528_0000003	IT	39.8692	16.1022	CAR1	39.2534	16.2114			NF	8.3	4.3	69.1107	419.207	628.92	0.02635	-0.18406	0.00291	0.00193	-0.215903	-1.34772	0.294913	-0.245039	-1.48395
EMSC-20120528_0000003	IT	39.8692	16.1022	CELI	39.4027	16.5088			NF	8.3	4.3	62.4743	494.642	1243.76	-0.0776	0.12593	0.00083	0.00178	-0.74208	-1.73655	-0.221344	-0.686399	-1.41777
EMSC-20120528_0000003	IT	39.8692	16.1022	JOPP	38.6068	15.8856			NF	8.3	4.3	141.606	488.391	504.213	0.12262	-0.20414	0.0001	0.00077	-0.887284	-2.11292	-0.433274	-1.01217	-1.95165
EMSC-20120528_0000003	IT	39.8692	16.1022	MCEL	40.3249	15.8019			NF	8.3	4.3	56.7455	515.868	981.452	-0.1695	0.04582	0.00339	0.00238	-0.206045	-1.43812	0.183194	-0.4194	-0.862819
EMSC-20120528_0000003	IT	39.8692	16.1022	MELA	41.7059	15.127			NF	8.3	4.3	220.112	326.399	118.099	-0.03509	0.0452	0.00147	0.00191	-1.30419	-2.22475	-0.844155	-1.06712	-1.75045
EMSC-20120528_0000003	IT	39.8692	16.1022	MGR	40.1376	15.5535			NF	8.3	4.3	55.4522	437.095	226.831	-0.48361	-0.50782	0.01137	0.00718	-0.157424	-1.50945	0.239351	-0.656989	-1.40509
EMSC-20120528_0000003	IT	39.8692	16.1022	MOCO	41.37	15.158			NF	8.3	4.3	184.93	462.311	1045.69	0.10377	-0.11592	0.00298	-2e-05	-1.68093	-2.41199	-1.45857	-1.27211	-1.62356
EMSC-20120528_0000003	IT	39.8692	16.1022	MRB1	41.1227	14.9681			NF	8.3	4.3	169.18	489.758	616.632	-0.15684	0.06437	0.00296	0.00382	-1.19218	-2.02795	-0.86311	-0.817063	-1.20803
EMSC-20120528_0000003	IT	39.8692	16.1022	MRLC	40.7564	15.4889			NF	8.3	4.3	111.517	479.543	563.341	-0.27306	-0.12974	0.00565	0.00615	-1.01188	-2.03234	-0.519002	-0.829901	-1.56605
EMSC-20120528_0000003	IT	39.8692	16.1022	MSAG	41.712	15.9096			NF	8.3	4.3	205.55	735.463	830.067	-0.07658	-0.05018	-0.00029	0.00095	-1.11994	-2.20731	-0.675207	-1.20415	-1.96384
EMSC-20120528_0000003	IT	39.8692	16.1022	PIPA	39.4851	16.8158			NF	8.3	4.3	74.5235	465.276	416.482	0.14304	-0.1633	0.00539	-0.00247	-0.729892	-1.92338	-0.275947	-0.700587	-1.67029
EMSC-20120528_0000003	IT	39.8692	16.1022	SALB	39.8772	16.3459			NF	8.3	4.3	20.8159	502.345	1132.22	-0.06429	-0.23787	0.00504	0.00431	0.739242	-0.540656	1.18309	0.289162	-0.639764
EMSC-20120528_0000003	IT	39.8692	16.1022	SERS	39.0359	16.6886			NF	8.3	4.3	105.453	502.336	1175.69	-0.14596	0.00591	0.00236	0.00399	-1.13128	-1.96866	-0.567888	-0.645574	-1.53922
EMSC-20120528_0000003	IT	39.8692	16.1022	SGTA	41.135	15.365			NF	8.3	4.3	153.933	454.684	654.229	0.04642	-0.09758	0.00243	-0.00081	-1.46806	-2.24097	-1.12354	-0.967563	-1.52067
EMSC-20120528_0000003	IT	39.8692	16.1022	T0712	39.8218	15.8518			NF	8.3	4.3	22.0175	531.705	312.09	-0.42653	0.08691	-0.00112	0.00157	0.106071	-1.34039	0.126749	-0.444874	-0.975961
EMSC-20120528_0000003	IT	39.8692	16.1022	T0716	39.9487	16.0224			NF	8.3	4.3	11.1568	429.172	547.223	0.079	-0.03909	-0.0001	-0.00014	1.05829	-0.564931	0.977557	0.481601	-0.593204
EMSC-20120528_0000073	GR	37.9953	21.5451	TRIZ	38.3654	22.0727			SS	12.7487	4.24	61.8116	600	16	-0.00292	-0.015	3e-05	0	0.19281	-1.27502	0.681685	-0.484068	-1.48498
EMSC-20120528_0000073	GR	37.9953	21.5451	DLFA	38.4784	22.4956			SS	12.7487	4.24	98.8802	900	511	-0.01822	-0.37187	0.00018	-0.00012	-0.809344	-1.90598	-0.250499	-0.766705	-1.78149
EMSC-20120528_0000073	GR	37.9953	21.5451	ITM	37.1787	21.9252			SS	12.7487	4.24	96.7799	844.349	512	-0.01976	-0.08096	0.00025	3e-05	-0.369106	-1.68212	-0.0606288	-0.534305	-1.52231
EMSC-20120528_0000073	GR	37.9953	21.5451	JAN	39.6562	20.8487			SS	12.7487	4.24	194.28	435.911	515	0.01206	-0.02499	3e-05	1e-05	-1.21112	-2.16259	-0.818396	-0.917293	-1.96293
EMSC-20120528_0000073	GR	37.9953	21.5451	MGNA	38.6561	20.7912			SS	12.7487	4.24	98.6081	411.497	65	0.03929	0.00081	-1e-05	8e-05	-0.268928	-1.63579	-0.183007	-0.532146	-1.6069
EMSC-20120528_0000073	GR	37.9953	21.5451	MNVA	36.6871	23.0373			SS	12.7487	4.24	196.369	883.644	11	0.09264	0.03325	-0.00021	-4e-05	-1.65788	-2.47755	-1.28241	-1.3726	-2.03906
EMSC-20120528_0000073	GR	37.9953	21.5451	NOAC	37.9738	23.7177			SS	12.7487	4.24	190.417	434.005	96	-0.02322	0.00027	5e-05	6e-05	-1.19986	-2.26323	-0.736818	-0.999042	-2.05915
EMSC-20120528_0000073	GR	37.9953	21.5451	YDRA	37.3495	23.4653			SS	12.7487	4.24	183.621	693.523	86	-0.04435	0.15921	8e-05	-0.0002	-0.839097	-2.18104	-0.585336	-0.794372	-2.09195
EMSC-20120604_0000085	TR	36.9166	28.2313	AMGA	36.8316	25.8938			NF	11.5261	4.48	208.131	625.424	282	-0.01177	-0.0446	0.00022	3e-05	-1.63529	-2.85904	-1.08687	-1.81038	-2.52058
EMSC-20120604_0000085	TR	36.9166	28.2313	KARP	35.5471	27.1611			NF	11.5261	4.48	180.009	883.296	416	0.15252	-0.10626	5e-05	0.0001	-0.812151	-2.17624	-0.488885	-0.940902	-2.19582
EMSC-20120604_0000085	TR	36.9166	28.2313	KSL	36.1503	29.5856			NF	11.5261	4.48	147.99	557.733	102	0.0315	0.04718	0.00018	-5e-05	-1.15645	-1.94348	-0.792433	-0.880417	-1.55571
EMSC-20120604_0000085	TR	36.9166	28.2313	DATC	36.7584	27.6602			NF	11.5261	4.48	53.7823	436.096	82	0.02251	-0.00919	3e-05	4e-05	1.65487	0.167272	1.83518	0.885604	-0.174618
EMSC-20120604_0000085	TR	36.9166	28.2313	DEMR	36.2365	29.9056			NF	11.5261	4.48	167.543	861.281	250	0.0831	-0.16979	0	2e-05	-0.469307	-1.37134	-0.0124995	-0.159821	-1.12448
EMSC-20120604_0000085	TR	36.9166	28.2313	DIDI	37.3767	27.2398			NF	11.5261	4.48	101.686	315.946	47	-0.01473	0.00554	0	3e-05	0.492381	-0.746988	0.922201	0.388592	-0.57741
EMSC-20120604_0000085	TR	36.9166	28.2313	GMLD	38.0764	26.8747			NF	11.5261	4.48	175.936	506.73	140	-0.02582	-0.03851	2e-05	1e-05	-0.0658318	-1.03284	0.237622	0.124257	-0.986172
EMSC-20120604_0000085	TR	36.9166	28.2313	MRSB	36.7161	28.1969			NF	11.5261	4.48	22.5039	732.254	433	0.02065	0.05366	0.00022	-0.00037	1.84811	0.33322	2.02297	1.11605	0.0195898
EMSC-20120604_0000085	TR	36.9166	28.2313	YKAV	37.1246	27.2801			NF	11.5261	4.48	87.5572	461.977	23	0.02211	-0.02852	1e-05	-1e-05	0.401133	-0.953378	0.815987	0.0268071	-1.06458
EMSC-20120607_0000082	TR	40.8459	27.9342	EFSA	39.5401	24.9886			SS	7.7495	5	289.246	477.937	20	-0.02705	0.04364	-2e-05	-7e-05	-0.649085	-1.59851	-0.335126	-0.394959	-1.02925
EMSC-20120607_0000082	TR	40.8459	27.9342	KVLA	40.937	24.3859			SS	7.7495	5	298.413	748.058	74	0.06768	-0.09968	-0.0001	-0.00014	-0.626838	-1.66167	-0.01727	-0.558358	-1.34946
EMSC-20120607_0000082	TR	40.8459	27.9342	LIA	39.8972	25.1806			SS	7.7495	5	256	464.17	45	0.04683	-0.0177	-3e-05	-1e-05	-0.510859	-1.48322	-0.0753764	-0.231202	-1.39508
EMSC-20120607_0000082	TR	40.8459	27.9342	PSRA	38.5398	25.562			SS	7.7495	5	327.006	600	11	-0.00241	-0.0154	5e-05	-2e-05	-0.425502	-1.5699	-0.0325267	-0.29894	-1.41048
EMSC-20120607_0000082	TR	40.8459	27.9342	SMTH	40.4709	25.5304			SS	7.7495	5	206.999	900	356	-0.27133	-0.01567	-0.00034	0.00014	-0.099166	-1.25019	0.392004	-0.173443	-1.05219
EMSC-20120607_0000082	TR	40.8459	27.9342	FOCM	38.7131	26.7309			SS	7.7495	5	258.482	553.331	7	-0.0426	-0.00284	-0.0001	1e-05	0.127177	-0.906679	0.660558	0.11963	-0.60714
EMSC-20120607_0000082	TR	40.8459	27.9342	GMLD	38.0764	26.8747			SS	7.7495	5	321.098	506.73	140	-0.02582	-0.03851	2e-05	1e-05	0.403154	-0.629917	0.890527	0.503827	-0.614266
EMSC-20120607_0000082	TR	40.8459	27.9342	GOKC	40.1998	25.9183			SS	7.7495	5	184.913	629.889	143	-0.10552	0.02364	-6e-05	-3e-05	0.858471	-0.268384	1.32181	0.841283	-0.0300054
EMSC-20120607_0000082	TR	40.8459	27.9342	GONE	40.0466	27.686			SS	7.7495	5	91.3259	440.139	144	-0.03639	0.04445	-0.00014	-2e-05	0.932233	-0.234123	1.31104	0.984452	-0.230119
EMSC-20120607_0000082	TR	40.8459	27.9342	KRBN	38.5936	26.5537			SS	7.7495	5	276.871	843.228	94	0.08041	0.05121	1e-05	8e-05	0.220934	-0.735989	0.624803	0.545827	-0.329538
EMSC-20120607_0000082	TR	40.8459	27.9342	SMAA	39.1005	28.9805			SS	7.7495	5	213.575	274.72	799	-0.00364	0.00311	0	0	0.303375	-0.637036	0.887862	0.67949	-0.322444
EMSC-20120609_0000005	IT	46.1803	12.4882	SCEL	46.5074	9.85542			TF	6.9	4	205.332	498.506	1787	0.04807	0.00351	-0.0003	4e-05	-0.675919	-2.03565	-0.195607	-1.05435	-2.32458
EMSC-20120609_0000005	IT	46.1803	12.4882	SCUC	46.798	10.3038			TF	6.9	4	180.778	859.115	1209	-0.00138	0.00796	-5e-05	-0.00039	-0.516977	-1.72955	-0.154241	-0.698358	-1.95205
EMSC-20120609_0000005	IT	46.1803	12.4882	STSP	46.6266	10.3332			TF	6.9	4	172.523	612.793	1757	0.00823	-0.1935	2e-05	-0.00056	-0.335142	-1.59783	0.15659	-0.943689	-2.0298
EMSC-20120609_0000005	IT	46.1803	12.4882	SZER	46.6975	10.0977			TF	6.9	4	191.986	900	1481	-0.12237	0.06531	-0.00015	-0.00034	-0.792808	-1.96243	-0.300927	-0.840704	-2.10127
EMSC-20120609_0000005	IT	46.1803	12.4882	ASOL	45.8003	11.9023			TF	6.9	4	61.9211	440.904	176.474	0.11058	-0.14179	0.00258	0.00239	0.399872	-1.08769	0.738285	-0.161953	-1.21563
EMSC-20120609_0000005	IT	46.1803	12.4882	BAG8	45.8228	10.4664			TF	6.9	4	161.14	522.233	789.394	-0.26316	-0.18155	-0.00017	0.00155	-0.0465863	-1.38042	0.512796	-0.769702	-1.81184
EMSC-20120609_0000005	IT	46.1803	12.4882	BORM	46.4694	10.3764			TF	6.9	4	165.311	582.356	1236.26	-0.17085	-0.18518	-0.00014	5e-05	-0.602771	-1.91244	-0.191018	-1.03154	-2.19678
EMSC-20120609_0000005	IT	46.1803	12.4882	BOTT	45.5494	10.3095			TF	6.9	4	182.696	445.305	262.396	-0.24697	0.1977	0.00351	-0.00181	-0.712586	-2.04696	-0.187931	-1.07081	-2.17473
EMSC-20120609_0000005	IT	46.1803	12.4882	CAPR	45.6372	9.9345			TF	6.9	4	206.591	431.826	221.417	0.00853	-0.03136	0.00097	0.00185	-0.796504	-1.9415	-0.370258	-0.930592	-2.07312
EMSC-20120609_0000005	IT	46.1803	12.4882	CNCS	45.606	10.217			TF	6.9	4	187.004	393.024	213.925	-0.01103	-0.035	-0.0011	0	-0.179669	-1.48326	0.334613	-0.692312	-1.83346
EMSC-20120609_0000005	IT	46.1803	12.4882	CRND	45.8361	12.0131			TF	6.9	4	53.0204	416.764	152.743	-0.00596	-0.01555	-0.00086	0.00046	0.106461	-1.35277	0.507068	-0.598914	-1.5894
EMSC-20120609_0000005	IT	46.1803	12.4882	FRE8	46.015	12.3552			TF	6.9	4	21.0478	530.979	518.705	-0.3602	-0.03653	0.00312	-0.00045	1.07132	-0.368196	1.4086	0.511172	-0.586853
EMSC-20120609_0000005	IT	46.1803	12.4882	IMOL	44.3595	11.7425			TF	6.9	4	210.698	392.25	27.18	-0.01767	0.03217	0.00033	-0.00061	-0.581849	-2.20825	-0.428165	-1.10079	-2.0361
EMSC-20120609_0000005	IT	46.1803	12.4882	LEOD	45.4582	10.1234			TF	6.9	4	200.066	392.25	87.208	0.00467	-0.0295	0.00119	0.00168	-0.28506	-1.46292	0.217402	-0.501323	-1.48549
EMSC-20120609_0000005	IT	46.1803	12.4882	MNTV	45.1495	10.7897	237	P	TF	6.9	4	174.803	237	30.014	-0.07567	0.00607	0.00108	0.00154	-0.276326	-1.55353	0.275312	-0.644412	-1.43219
EMSC-20120609_0000005	IT	46.1803	12.4882	MODE	44.6297	10.9492			TF	6.9	4	210.142	240.038	33.828	0.05655	0.04132	-0.00057	-0.00068	-0.892709	-1.99227	-0.469003	-0.869589	-1.98475
EMSC-20120609_0000005	IT	46.1803	12.4882	OPPE	45.3082	11.1724	264	P	TF	6.9	4	140.812	264	22.79	-0.03814	-0.02095	-9e-05	0.00067	0.128199	-1.23113	0.524329	-0.380177	-1.38513
EMSC-20120609_0000005	IT	46.1803	12.4882	ORZI	45.4056	9.9307			TF	6.9	4	216.176	251.796	79.687	-0.00735	-0.00213	0.00169	0.00054	-0.675706	-1.80985	-0.241948	-0.700198	-1.70546
EMSC-20120609_0000005	IT	46.1803	12.4882	SANR	45.64	11.61	321	P-MASW	TF	6.9	4	90.6988	321	39.486	-0.03085	0.09512	-0.00038	-0.00046	0.319733	-1.32259	0.490236	-0.404997	-1.53318
EMSC-20120609_0000005	IT	46.1803	12.4882	SERM	45.01	11.2958			TF	6.9	4	159.813	246.853	8.33	-0.02867	-0.01756	-0.00092	-0.00059	-0.69827	-2.01203	-0.172916	-0.932277	-2.02717
EMSC-20120609_0000005	IT	46.1803	12.4882	STAL	46.2601	12.7104			TF	6.9	4	19.2606	546.35	621.094	-0.26429	0.46224	-0.00577	-0.00218	1.21927	-0.396464	1.20832	-0.00234804	-0.954103
EMSC-20120609_0000005	IT	46.1803	12.4882	T0800	44.8486	11.2479			TF	6.9	4	176.818	192.122	3.492	0.01378	-0.07535	-0.00044	0.00242	-0.490701	-1.71639	-0.0337067	-0.812304	-1.71982
EMSC-20120609_0000005	IT	46.1803	12.4882	T0802	44.875	11.1816			TF	6.9	4	177.269	191.978	7.987	-0.05744	0.0211	0.00176	0.00119	-0.357641	-1.64614	0.143514	-0.811588	-1.68153
EMSC-20120609_0000005	IT	46.1803	12.4882	T0803	44.7668	11.3508			TF	6.9	4	180.464	206.742	14.595	0.04584	-0.03929	-0.0001	0.00027	-0.510943	-1.65757	-0.0241378	-0.596515	-1.70811
EMSC-20120609_0000005	IT	46.1803	12.4882	T0805	44.9187	11.3226			TF	6.9	4	167.081	188.812	-5.65	-0.04878	-0.05091	-0.00108	-0.00172	-0.184115	-1.3617	0.236754	-0.34906	-1.47283
EMSC-20120609_0000005	IT	46.1803	12.4882	T0811	44.7838	11.2265			TF	6.9	4	183.811	194.025	7.565	-0.02095	0.02455	-0.00022	8e-05	-0.509366	-1.73491	-0.00517781	-0.659337	-1.71585
EMSC-20120609_0000005	IT	46.1803	12.4882	T0812	44.9547	11.181			TF	6.9	4	170.074	214.863	7.514	-0.03997	0.00493	0.00167	0.00139	-0.28418	-1.55722	0.317296	-0.486291	-1.48584
EMSC-20120609_0000005	IT	46.1803	12.4882	T0813	44.8778	11.1992			TF	6.9	4	176.228	191.087	6.682	-0.03671	-0.03493	0.00037	0.00196	-0.453106	-1.74108	-0.0909552	-0.837597	-1.67268
EMSC-20120609_0000005	IT	46.1803	12.4882	T0814	44.7933	10.9692			TF	6.9	4	194.435	203.825	18.294	0.00639	0.02717	0.00078	-0.0001	-0.616189	-1.86718	-0.196815	-0.826021	-1.81375
EMSC-20120609_0000005	IT	46.1803	12.4882	T0815	44.8731	11.7198			TF	6.9	4	157.195	214.863	7.482	-0.00658	0.0109	-0.00045	-0.0002	-0.449156	-1.66695	-0.0395864	-0.599972	-1.53905
EMSC-20120609_0000005	IT	46.1803	12.4882	T0816	44.7207	11.5976			TF	6.9	4	176.541	162.367	7.981	-0.0054	0.00718	-0.0006	-0.00026	-0.37791	-1.65743	0.132536	-0.693225	-1.69922
EMSC-20120609_0000005	IT	46.1803	12.4882	T0817	44.9916	11.4559			TF	6.9	4	154.671	192.131	7.966	-0.00497	0.00022	-0.00059	-0.00038	0.0265338	-1.1866	0.547674	-0.280412	-1.34121
EMSC-20120609_0000005	IT	46.1803	12.4882	T0818	44.9348	11.0304			TF	6.9	4	179.054	199.605	10.943	-0.01113	-0.01025	-0.00051	-0.00039	-0.305816	-1.61829	0.242725	-0.540379	-1.57735
EMSC-20120609_0000005	IT	46.1803	12.4882	T0819	44.8873	10.8987	208	ESAC	TF	6.9	4	189.727	208	18	0.04882	0.01048	-0.00124	-0.00031	-0.600869	-1.76441	-0.10819	-0.539574	-1.63104
EMSC-20120609_0000005	IT	46.1803	12.4882	T0821	44.9035	11.5405	184	CH	TF	6.9	4	160.009	184	7.519	-0.01149	0.03714	-0.00086	-0.00103	-0.196806	-1.40545	0.283668	-0.487256	-1.5087
EMSC-20120609_0000005	IT	46.1803	12.4882	T0823	44.6862	11.2771			TF	6.9	4	191.127	203.991	10.34	0.02019	-0.02096	0.00063	-0.00015	-0.550771	-1.81979	0.0768565	-0.883412	-1.82834
EMSC-20120609_0000005	IT	46.1803	12.4882	T0826	44.8394	10.8113			TF	6.9	4	198.248	198.252	17.569	0.02547	-0.00801	0.00031	-6e-05	-0.554875	-1.87637	0.0387333	-0.838619	-1.7659
EMSC-20120609_0000005	IT	46.1803	12.4882	T0827	44.9377	10.9319			TF	6.9	4	183.766	197.096	15.536	0.00527	-0.02518	-0.00092	-0.00048	0.132608	-1.19833	0.556959	-0.314544	-1.00996
EMSC-20120609_0000005	IT	46.1803	12.4882	T0828	44.8308	10.9143			TF	6.9	4	193.799	200.723	13.137	0.00263	0.0101	-0.00116	-0.00119	-0.479563	-1.73751	-0.0277488	-0.651594	-1.75419
EMSC-20120609_0000005	IT	46.1803	12.4882	VOBA	45.6429	10.504			TF	6.9	4	164.724	390.88	235.565	-0.02126	0.17851	0.0004	0.00016	-0.101642	-1.54239	0.20306	-0.918522	-1.87341
EMSC-20120609_0000005	IT	46.1803	12.4882	ZEN8	45.6378	10.7319			TF	6.9	4	148.667	492.599	598.335	0.01707	-0.15042	0.00168	-0.00048	-0.627183	-1.92255	-0.261186	-0.912631	-2.01338
EMSC-20120609_0000005	IT	46.1803	12.4882	ZOVE	45.4536	11.4876			TF	6.9	4	111.992	498.245	373.619	0.16646	0.01113	0.00037	0.00079	-0.0470174	-1.5293	0.153209	-0.709863	-1.8924
EMSC-20120609_0000005	IT	46.1803	12.4882	CAS02	44.836	11.4834			TF	6.9	4	168.74	201.809	12.119	-0.03272	-0.00588	3e-05	-0.00035	-0.20055	-1.35909	0.208654	-0.305842	-1.47234
EMSC-20120609_0000005	IT	46.1803	12.4882	CAS05	44.8022	11.4097			TF	6.9	4	174.777	204.243	11.69	-0.03985	-0.02728	-0.00099	-0.00139	-0.387323	-1.68065	0.118988	-0.515739	-1.67026
EMSC-20120609_0000005	IT	46.1803	12.4882	CAS06	44.8203	11.4918			TF	6.9	4	169.993	199.717	12.79	0.01331	0.00049	0.0006	0.00032	-0.422716	-1.53495	0.102885	-0.406208	-1.45102
EMSC-20120609_0000005	IT	46.1803	12.4882	CAS07	44.7329	11.3669			TF	6.9	4	183.164	214.863	9.759	-0.00904	0.0118	-4e-05	-0.00053	-0.660652	-1.69429	-0.234847	-0.533259	-1.64495
EMSC-20120609_0000005	IT	46.1803	12.4882	CAS08	44.7726	11.4322			TF	6.9	4	176.859	192.963	10.803	-0.00872	0.01921	0.00065	0.00022	-0.560863	-1.73332	-0.069259	-0.619457	-1.49688
EMSC-20120609_0000005	IT	46.1803	12.4882	MIR01	44.844	11.0713			TF	6.9	4	185.106	206.05	18.678	0.03089	-0.00724	0.00091	0.00054	-0.491118	-1.8118	0.0467406	-0.754522	-1.79672
EMSC-20120609_0000005	IT	46.1803	12.4882	MIR02	44.8869	11.0732			TF	6.9	4	181.184	204.159	15.694	0.04856	-0.01631	-0.00023	-0.00096	-0.475147	-1.7698	-0.0592537	-0.77861	-1.65725
EMSC-20120609_0000005	IT	46.1803	12.4882	MIR03	44.9384	11.1045			TF	6.9	4	175.137	194.534	10.369	-0.04155	0.00499	9e-05	-6e-05	-0.321143	-1.44448	0.250204	-0.390122	-1.52652
EMSC-20120609_0000005	IT	46.1803	12.4882	MIR04	44.9274	11.1783			TF	6.9	4	172.651	192.826	0.711	0.00715	-0.02626	-0.00053	-0.00049	-0.344872	-1.65582	0.181737	-0.542466	-1.68576
EMSC-20120609_0000005	IT	46.1803	12.4882	MIR05	44.9808	11.1072			TF	6.9	4	171.287	202.571	10.57	0.01125	-0.03582	-0.00041	-8e-05	-0.304438	-1.53823	0.160168	-0.520586	-1.41445
EMSC-20120609_0000005	IT	46.1803	12.4882	MIR06	45.0401	11.0874			TF	6.9	4	167.167	223.901	11.534	0.01487	-0.01335	-0.00013	-0.00126	-0.217853	-1.52538	0.124482	-0.556332	-1.54108
EMSC-20120609_0000005	IT	46.1803	12.4882	MIR07	45.081	11.13			TF	6.9	4	161.535	233.079	8.413	-0.01179	0.02219	0.00149	0.0006	-0.218866	-1.3701	0.151887	-0.351686	-1.34622
EMSC-20120609_0000005	IT	46.1803	12.4882	MIR08	44.9169	11.0895			TF	6.9	4	177.754	196.987	9.988	-0.00163	-0.03572	0.00018	-0.00073	-0.359835	-1.59783	0.120034	-0.706192	-1.5511
EMSC-20120614_0000020	TR	37.2159	42.4833	ERCV	39.0198	43.3381			TF	11.3468	5.23	214.067	343.689	1668	-0.01091	-0.00365	-2e-05	1e-05	0.779898	-0.0935545	0.925424	1.01736	0.424159
EMSC-20120614_0000084	TR	36.2597	29.0971	KARP	35.5471	27.1611			SS	25.5431	4.71	191.53	883.296	416	0.15252	-0.10626	5e-05	0.0001	-0.572684	-2.07908	-0.436507	-1.02337	-1.97636
EMSC-20120614_0000084	TR	36.2597	29.0971	KSL	36.1503	29.5856			SS	25.5431	4.71	45.4876	557.733	102	0.0315	0.04718	0.00018	-5e-05	0.0798978	-0.972551	0.58016	0.222366	-0.813062
EMSC-20120614_0000084	TR	36.2597	29.0971	DATC	36.7584	27.6602			SS	25.5431	4.71	139.881	436.096	82	0.02251	-0.00919	3e-05	4e-05	0.695328	-0.503655	1.11102	0.714751	-0.489424
EMSC-20120614_0000084	TR	36.2597	29.0971	KEMT	36.6037	30.5559			SS	25.5431	4.71	135.998	453.978	14	0.03202	0.01149	-5e-05	-3e-05	0.762054	-0.474708	1.36124	0.241751	-0.733321
EMSC-20120614_0000084	TR	36.2597	29.0971	MRSB	36.7161	28.1969			SS	25.5431	4.71	95.1413	732.254	433	0.02065	0.05366	0.00022	-0.00037	0.997616	-0.21819	1.4217	0.509014	-0.497365
EMSC-20120614_0000084	TR	36.2597	29.0971	YKAV	37.1246	27.2801			SS	25.5431	4.71	188.398	461.977	23	0.02211	-0.02852	1e-05	-1e-05	0.0434307	-1.09183	0.439936	0.0632483	-0.830991
EMSC-20120619_0000008	TR	39.1388	29.1254	ESKT	39.5212	30.8492			NF	12.5718	4.56	154.238	649.232	1204	-0.07431	0.07917	0.0004	0.00011	0.052811	-1.17135	0.486697	-0.211928	-1.18546
EMSC-20120619_0000008	TR	39.1388	29.1254	GONE	40.0466	27.686			NF	12.5718	4.56	159.374	440.139	144	-0.03639	0.04445	-0.00014	-2e-05	0.747415	-0.341365	1.16059	0.881908	-0.424722
EMSC-20120619_0000008	TR	39.1388	29.1254	SMAA	39.1005	28.9805			NF	12.5718	4.56	13.2058	274.72	799	-0.00364	0.00311	0	0	2.28071	0.928632	2.58064	1.9508	0.696179
EMSC-20120624_0000067	TR	38.7294	43.6246	GNI	40.148	44.741			TF	10.719	4.9	184.587	733.137	1556	0.00299	-0.09929	-6e-05	-7e-05	-0.725758	-1.59462	-0.505114	-0.350238	-0.984154
EMSC-20120624_0000067	TR	38.7294	43.6246	ERCV	39.0198	43.3381			TF	10.719	4.9	40.7164	343.689	1668	-0.01091	-0.00365	-2e-05	1e-05	1.74493	0.597144	2.11454	1.71675	1.12108
EMSC-20120722_0000030	TR	37.5678	36.3581	KRTD	36.5934	35.4157			NF	9.7416	4.77	136.85	362.858	24	-0.00117	-0.00581	1e-05	2e-05	0.162481	-0.647482	0.504234	0.642859	-0.0238373
EMSC-20120722_0000030	TR	37.5678	36.3581	NIG	38.108	34.6142			NF	9.7416	4.77	164.498	665.455	2155	0.08773	-0.06392	3e-05	0.00021	0.363315	-0.440988	0.707514	0.927711	0.0699953
EMSC-20120805_0000048	TR	37.3725	42.9766	ERCV	39.0198	43.3381			SS	15.1709	5.05	185.875	343.689	1668	-0.01091	-0.00365	-2e-05	1e-05	0.584661	-0.354022	0.976775	0.827331	0.195694
EMSC-20120806_0000044	GR	38.7533	24.8276	ALNA	39.148	23.8667			SS	14.331	4.2	93.9743	604.69	8	0.03835	-0.03635	-5e-05	-6e-05	-0.269604	-1.25026	-0.000956008	0.0871989	-1.19466
EMSC-20120806_0000044	GR	38.7533	24.8276	DLFA	38.4784	22.4956			SS	14.331	4.2	204.893	900	511	-0.01822	-0.37187	0.00018	-0.00012	-1.47981	-2.49952	-1.20091	-1.27012	-2.39836
EMSC-20120806_0000044	GR	38.7533	24.8276	LIA	39.8972	25.1806			SS	14.331	4.2	130.774	464.17	45	0.04683	-0.0177	-3e-05	-1e-05	-0.698355	-1.94095	-0.0544227	-0.891594	-1.99214
EMSC-20120806_0000044	GR	38.7533	24.8276	NOAC	37.9738	23.7177			SS	14.331	4.2	129.908	434.005	96	-0.02322	0.00027	5e-05	6e-05	-0.834954	-2.06373	-0.316784	-0.896903	-1.81929
EMSC-20120806_0000044	GR	38.7533	24.8276	PSRA	38.5398	25.562			SS	14.331	4.2	68.056	600	11	-0.00241	-0.0154	5e-05	-2e-05	0.218156	-1.23086	0.546576	-0.516056	-1.55147
EMSC-20120806_0000044	GR	38.7533	24.8276	TNSA	37.5394	25.1631			SS	14.331	4.2	138.129	498.109	10	-0.00543	-0.03838	0	-6e-05	-1.01831	-2.32391	-0.641847	-1.34473	-2.25187
EMSC-20120806_0000044	GR	38.7533	24.8276	YDRA	37.3495	23.4653			SS	14.331	4.2	196.453	693.523	86	-0.04435	0.15921	8e-05	-0.0002	-1.16828	-2.31768	-0.81734	-1.06659	-2.11828
EMSC-20120912_0000014	GR	34.8285	24.0647	IMMV	35.4599	23.9802			TF	29.669	5.3	70.6275	795.072	188	-0.02677	0.13844	6e-05	-0.00015	1.01976	-0.243765	1.44305	0.812256	-0.303908
EMSC-20120912_0000014	GR	34.8285	24.0647	AMGA	36.8316	25.8938			TF	29.669	5.3	277.115	625.424	282	-0.01177	-0.0446	0.00022	3e-05	-0.931471	-1.73664	-0.499031	-0.654464	-1.09644
EMSC-20120912_0000014	GR	34.8285	24.0647	ANKY	35.867	23.3012			TF	29.669	5.3	134.651	619.572	100	-0.0098	0.05556	-0.00012	-3e-05	-0.0405098	-1.04444	0.378666	0.270029	-0.471163
EMSC-20120912_0000014	GR	34.8285	24.0647	GVD	34.8391	24.0874			TF	29.669	5.3	2.38426	669.155	186	0.07511	0.04868	-4e-05	1e-05	2.45464	1.25051	2.95278	2.05417	0.897122
EMSC-20120912_0000014	GR	34.8285	24.0647	IACM	35.3058	25.0709			TF	29.669	5.3	105.842	395.328	66	-0.00016	0.02528	-0.00012	-1e-05	1.02881	0.033263	1.52958	1.1478	0.00650819
EMSC-20120912_0000014	GR	34.8285	24.0647	ITM	37.1787	21.9252			TF	29.669	5.3	324.529	844.349	512	-0.01976	-0.08096	0.00025	3e-05	-0.982473	-1.50255	-0.721667	-0.740926	-0.729906
EMSC-20120912_0000014	GR	34.8285	24.0647	KARP	35.5471	27.1611			TF	29.669	5.3	292.495	883.296	416	0.15252	-0.10626	5e-05	0.0001	-0.539706	-1.55273	-0.227618	-0.395131	-1.0979
EMSC-20120912_0000014	GR	34.8285	24.0647	MNVA	36.6871	23.0373			TF	29.669	5.3	226.501	883.644	11	0.09264	0.03325	-0.00021	-4e-05	-0.778173	-1.55969	-0.342944	-0.352682	-0.96537
EMSC-20120912_0000014	GR	34.8285	24.0647	SIVA	35.0175	24.81			TF	29.669	5.3	71.1206	383.53	85	-0.00016	0.02501	-2e-05	1e-05	1.14073	0.0744625	1.74043	1.19106	-0.0841308
EMSC-20120912_0000014	GR	34.8285	24.0647	TNSA	37.5394	25.1631			TF	29.669	5.3	317.143	498.109	10	-0.00543	-0.03838	0	-6e-05	-0.990487	-1.87175	-0.503004	-0.660496	-1.32716
EMSC-20120912_0000014	GR	34.8285	24.0647	YDRA	37.3495	23.4653			TF	29.669	5.3	285.445	693.523	86	-0.04435	0.15921	8e-05	-0.0002	-0.657328	-1.59362	-0.216381	-0.435474	-0.877531
EMSC-20120912_0000014	GR	34.8285	24.0647	ZKR	35.1147	26.217			TF	29.669	5.3	198.673	745.462	201	0.10514	-0.01014	-0.00019	-4e-05	-0.321895	-1.14854	0.0559275	0.0236417	-0.626696
EMSC-20120919_0000033	TR	37.3003	37.0949	KRTD	36.5934	35.4157			SS	10.1555	4.95	168.657	362.858	24	-0.00117	-0.00581	1e-05	2e-05	0.227423	-0.709738	0.601292	0.479858	-0.157847
EMSC-20120922_0000007	GR	38.0976	22.7337	IMMV	35.4599	23.9802			NF	19.2839	5	313.597	795.072	188	-0.02677	0.13844	6e-05	-0.00015	-1.108	-2.10767	-0.578569	-0.948914	-1.54967
EMSC-20120922_0000007	GR	38.0976	22.7337	ALNA	39.148	23.8667			NF	19.2839	5	152.742	604.69	8	0.03835	-0.03635	-5e-05	-6e-05	-0.328544	-1.17019	0.0742791	0.0170085	-0.728239
EMSC-20120922_0000007	GR	38.0976	22.7337	AMGA	36.8316	25.8938			NF	19.2839	5	312.397	625.424	282	-0.01177	-0.0446	0.00022	3e-05	-1.66902	-2.33294	-1.2717	-1.53338	-1.6745
EMSC-20120922_0000007	GR	38.0976	22.7337	ANKY	35.867	23.3012			NF	19.2839	5	253.095	619.572	100	-0.0098	0.05556	-0.00012	-3e-05	-1.15288	-1.90802	-0.624556	-0.948755	-1.3701
EMSC-20120922_0000007	GR	38.0976	22.7337	DLFA	38.4784	22.4956			NF	19.2839	5	47.1643	900	511	-0.01822	-0.37187	0.00018	-0.00012	0.899016	-0.552389	1.0726	0.477736	-0.487854
EMSC-20120922_0000007	GR	38.0976	22.7337	EFSA	39.5401	24.9886			NF	19.2839	5	252.757	477.937	20	-0.02705	0.04364	-2e-05	-7e-05	-1.03321	-1.6912	-0.776407	-0.576136	-1.08432
EMSC-20120922_0000007	GR	38.0976	22.7337	IMMV	35.4599	23.9802			NF	19.2839	5	313.597	795.072	188	-0.02677	0.13844	6e-05	-0.00015	-1.1169	-2.11654	-0.587471	-0.95782	-1.55857
EMSC-20120922_0000007	GR	38.0976	22.7337	ITM	37.1787	21.9252			NF	19.2839	5	124.528	844.349	512	-0.01976	-0.08096	0.00025	3e-05	-0.448828	-1.30744	0.0284184	-0.350391	-0.687531
EMSC-20120922_0000007	GR	38.0976	22.7337	JAN	39.6562	20.8487			NF	19.2839	5	238.02	435.911	515	0.01206	-0.02499	3e-05	1e-05	-0.734732	-1.65907	-0.253408	-0.399444	-1.04775
EMSC-20120922_0000007	GR	38.0976	22.7337	KASA	39.7463	19.9354			NF	19.2839	5	303.634	900	41	0.09573	-0.04553	-0.00012	1e-05	-0.974937	-1.98065	-0.395982	-0.930051	-1.23145
EMSC-20120922_0000007	GR	38.0976	22.7337	LIA	39.8972	25.1806			NF	19.2839	5	291.106	464.17	45	0.04683	-0.0177	-3e-05	-1e-05	-1.33576	-1.95857	-0.892149	-0.954543	-1.36988
EMSC-20120922_0000007	GR	38.0976	22.7337	MGNA	38.6561	20.7912			NF	19.2839	5	180.355	411.497	65	0.03929	0.00081	-1e-05	8e-05	-0.31921	-1.27833	0.113679	0.0465641	-0.922987
EMSC-20120922_0000007	GR	38.0976	22.7337	MNVA	36.6871	23.0373			NF	19.2839	5	159.119	883.644	11	0.09264	0.03325	-0.00021	-4e-05	-0.90582	-1.63012	-0.531969	-0.797209	-1.01587
EMSC-20120922_0000007	GR	38.0976	22.7337	NOAC	37.9738	23.7177			NF	19.2839	5	87.2676	434.005	96	-0.02322	0.00027	5e-05	6e-05	0.101806	-1.20028	0.412214	-0.172835	-0.65344
EMSC-20120922_0000007	GR	38.0976	22.7337	PLG	40.3733	23.4444			NF	19.2839	5	260.34	493.142	535	-0.05298	-0.01891	-1e-05	-1e-05	-1.30274	-2.06115	-0.836154	-1.13676	-1.53761
EMSC-20120922_0000007	GR	38.0976	22.7337	PSRA	38.5398	25.562			NF	19.2839	5	251.584	600	11	-0.00241	-0.0154	5e-05	-2e-05	-1.03656	-1.92872	-0.769379	-1.07727	-1.4564
EMSC-20120922_0000007	GR	38.0976	22.7337	TNSA	37.5394	25.1631			NF	19.2839	5	222.231	498.109	10	-0.00543	-0.03838	0	-6e-05	-0.879471	-1.95869	-0.571255	-1.04551	-1.45696
EMSC-20120922_0000007	GR	38.0976	22.7337	YDRA	37.3495	23.4653			NF	19.2839	5	105.168	693.523	86	-0.04435	0.15921	8e-05	-0.0002	-0.173091	-1.23194	0.230243	-0.117944	-0.848545
EMSC-20120922_0000007	GR	38.0976	22.7337	CESE	38.3306	26.2997			NF	19.2839	5	312.604	409.533	15	-0.01939	-0.00824	2e-05	-3e-05	-1.04728	-1.56948	-0.806802	-0.578473	-0.989618
EMSC-20121005_0000039	TR	39.3688	33.8186	ANTO	39.868	32.7934			NF	4.3051	4.65	103.885	612.65	1055	-0.02595	0.06809	3e-05	-4e-05	0.283041	-1.2177	0.530071	-0.497492	-1.48278
EMSC-20121005_0000039	TR	39.3688	33.8186	NIG	38.108	34.6142			NF	4.3051	4.65	156.255	665.455	2155	0.08773	-0.06392	3e-05	0.00021	0.318865	-0.772699	0.775127	0.513326	-0.707155
EMSC-20121006_0000059	GR	40.2439	25.2668	ALNA	39.148	23.8667			SS	9.9955	4.47	170.87	604.69	8	0.03835	-0.03635	-5e-05	-6e-05	-1.44045	-2.2659	-1.04813	-0.936759	-2.09365
EMSC-20121006_0000059	GR	40.2439	25.2668	EFSA	39.5401	24.9886			SS	9.9955	4.47	81.7725	477.937	20	-0.02705	0.04364	-2e-05	-7e-05	-0.334727	-1.46352	-0.00735078	-0.331053	-1.52436
EMSC-20121006_0000059	GR	40.2439	25.2668	KVLA	40.937	24.3859			SS	9.9955	4.47	107.111	748.058	74	0.06768	-0.09968	-0.0001	-0.00014	-0.475515	-1.85541	-0.249333	-0.937787	-1.69109
EMSC-20121006_0000059	GR	40.2439	25.2668	LIA	39.8972	25.1806			SS	9.9955	4.47	39.2382	464.17	45	0.04683	-0.0177	-3e-05	-1e-05	0.0846804	-1.32855	0.246623	-0.351407	-1.41018
EMSC-20121006_0000059	GR	40.2439	25.2668	PLG	40.3733	23.4444			SS	9.9955	4.47	155.192	493.142	535	-0.05298	-0.01891	-1e-05	-1e-05	-1.37845	-2.50484	-0.962169	-1.20507	-2.11877
EMSC-20121006_0000059	GR	40.2439	25.2668	PSRA	38.5398	25.562			SS	9.9955	4.47	191.18	600	11	-0.00241	-0.0154	5e-05	-2e-05	-0.884579	-2.00777	-0.419199	-0.837503	-1.92372
EMSC-20121006_0000059	GR	40.2439	25.2668	SMTH	40.4709	25.5304			SS	9.9955	4.47	33.7107	900	356	-0.27133	-0.01567	-0.00034	0.00014	0.510835	-1.13189	0.630612	-0.437785	-1.38326
EMSC-20121006_0000059	GR	40.2439	25.2668	FOCM	38.7131	26.7309			SS	9.9955	4.47	211.568	553.331	7	-0.0426	-0.00284	-0.0001	1e-05	-0.192869	-1.34789	0.266435	-0.183513	-1.2157
EMSC-20121006_0000059	GR	40.2439	25.2668	GOKC	40.1998	25.9183			SS	9.9955	4.47	55.531	629.889	143	-0.10552	0.02364	-6e-05	-3e-05	1.33475	-0.158544	1.66165	0.459567	-0.592838
EMSC-20121006_0000059	GR	40.2439	25.2668	GONE	40.0466	27.686			SS	9.9955	4.47	206.789	440.139	144	-0.03639	0.04445	-0.00014	-2e-05	0.470167	-0.604979	0.828656	0.477332	-0.694227
EMSC-20121006_0000059	GR	40.2439	25.2668	TKR	40.9902	27.5357			SS	9.9955	4.47	208.706	448.765	131	0.0082	-0.04592	0.0001	9e-05	0.179698	-1.14214	0.562496	-0.340355	-1.446
EMSC-20121026_0000111	GR	38.9436	22.9012	TRIZ	38.3654	22.0727			NF	18.7951	4.5	96.4806	600	16	-0.00292	-0.015	3e-05	0	0.270709	-1.08342	0.765575	-0.169778	-1.21264
EMSC-20121110_0000088	GR	37.9046	20.8995	TRIZ	38.3654	22.0727			SS	8.1416	4.2	114.693	600	16	-0.00292	-0.015	3e-05	0	-0.362407	-1.82675	-0.0115411	-0.921772	-1.8963
EMSC-20121113_0000120	TR	37.3134	37.1448	KRTD	36.5934	35.4157			SS	9.624	4.85	173.249	362.858	24	-0.00117	-0.00581	1e-05	2e-05	-0.272163	-1.29195	0.209433	-0.0485667	-0.770676
EMSC-20121114_0000001	TR	37.3265	37.1578	KRTD	36.5934	35.4157			TF	10.9351	4.41	174.936	362.858	24	-0.00117	-0.00581	1e-05	2e-05	-0.559657	-1.67186	-0.0716159	-0.449631	-1.28655
EMSC-20121122_0000039	IT	37.791	14.94	EPOZ	37.6719	15.1885			SS	25.14	4.1	25.5533	460.817	53.815	0.01757	0.03045	0.00011	0.00025	0.321593	-1.03519	0.833713	-0.0703628	-1.28098
EMSC-20121122_0000039	IT	37.791	14.94	EVRN	37.6892	15.1356			SS	25.14	4.1	20.5903	460.817	351.521	0.00709	0.11715	-0.00103	-0.00024	0.820931	-0.644631	1.23168	0.0719518	-1.12907
EMSC-20121122_0000039	IT	37.791	14.94	JOPP	38.6068	15.8856			SS	25.14	4.1	122.704	488.391	504.213	0.12262	-0.20414	0.0001	0.00077	-1.13771	-2.34958	-0.782854	-1.17277	-2.42994
EMSC-20121122_0000039	IT	37.791	14.94	CEL	38.2603	15.8939			SS	25.14	4.1	98.5103	533.959	639.022	0.13038	-0.416	0.00255	-0.00228	-1.15624	-2.46058	-0.669664	-1.32387	-2.55293
EMSC-20121122_0000039	IT	37.791	14.94	TIP	39.1794	16.7583			SS	25.14	4.1	221.083	533.388	776.877	0.22392	0.14522	-0.00153	-0.00412	-2.25653	-3.18094	-1.96928	-2.05361	-2.77164
EMSC-20121204_0000068	GR	36.9224	23.0705	TRIZ	38.3654	22.0727			NF	19.5431	4.55	182.93	600	16	-0.00292	-0.015	3e-05	0	-0.887935	-2.05185	-0.318953	-0.994479	-1.71974
EMSC-20121204_0000068	GR	36.9224	23.0705	IMMV	35.4599	23.9802			NF	19.5431	4.55	181.961	795.072	188	-0.02677	0.13844	6e-05	-0.00015	-0.99291	-2.18709	-0.497591	-0.898229	-1.93836
EMSC-20121206_0000063	GR	36.9091	23.094	TRIZ	38.3654	22.0727			NF	19.6565	4.4	185.228	600	16	-0.00292	-0.015	3e-05	0	-1.15668	-2.31884	-0.597929	-1.2212	-1.72861
EMSC-20121206_0000063	GR	36.9091	23.094	IMMV	35.4599	23.9802			NF	19.6565	4.4	179.7	795.072	188	-0.02677	0.13844	6e-05	-0.00015	-0.857419	-2.05888	-0.309735	-0.804967	-1.83728
EMSC-20130108_0000044	GR	39.6681	25.5372	ALNA	39.148	23.8667			SS	11.1303	5.81	154.729	604.69	8	0.03835	-0.03635	-5e-05	-6e-05	0.572809	-0.292394	0.869377	0.999685	-0.00882786
EMSC-20130108_0000044	GR	39.6681	25.5372	AMGA	36.8316	25.8938			SS	11.1303	5.81	316.94	625.424	282	-0.01177	-0.0446	0.00022	3e-05	-0.869783	-1.31226	-0.580872	-0.557091	-0.80537
EMSC-20130108_0000044	GR	39.6681	25.5372	DLFA	38.4784	22.4956			SS	11.1303	5.81	293.985	900	511	-0.01822	-0.37187	0.00018	-0.00012	-0.488515	-1.08326	-0.316414	-0.0216654	-0.843405
EMSC-20130108_0000044	GR	39.6681	25.5372	EFSA	39.5401	24.9886			SS	11.1303	5.81	49.1025	477.937	20	-0.02705	0.04364	-2e-05	-7e-05	1.51358	0.43146	1.82295	1.44035	0.380965
EMSC-20130108_0000044	GR	39.6681	25.5372	KVLA	40.937	24.3859			SS	11.1303	5.81	171.58	748.058	74	0.06768	-0.09968	-0.0001	-0.00014	0.518984	-0.534441	0.922583	0.338969	0.0316016
EMSC-20130108_0000044	GR	39.6681	25.5372	LIA	39.8972	25.1806			SS	11.1303	5.81	39.7244	464.17	45	0.04683	-0.0177	-3e-05	-1e-05	1.38204	0.0171524	1.6916	1.09117	0.338865
EMSC-20130108_0000044	GR	39.6681	25.5372	NOAC	37.9738	23.7177			SS	11.1303	5.81	245.629	434.005	96	-0.02322	0.00027	5e-05	6e-05	0.0119001	-0.842285	0.214156	0.305857	-0.512154
EMSC-20130108_0000044	GR	39.6681	25.5372	PLG	40.3733	23.4444			SS	11.1303	5.81	194.69	493.142	535	-0.05298	-0.01891	-1e-05	-1e-05	-0.156716	-1.07255	0.373828	0.0402096	-0.587123
EMSC-20130108_0000044	GR	39.6681	25.5372	PRK	39.2456	26.265			SS	11.1303	5.81	78.1711	439.853	104	-0.02311	-0.00716	4e-05	3e-05	1.44599	0.283306	1.81995	1.2649	0.312577
EMSC-20130108_0000044	GR	39.6681	25.5372	PSRA	38.5398	25.562			SS	11.1303	5.81	125.482	600	11	-0.00241	-0.0154	5e-05	-2e-05	0.983443	-0.20834	1.46337	0.919965	0.136365
EMSC-20130108_0000044	GR	39.6681	25.5372	SMTH	40.4709	25.5304			SS	11.1303	5.81	89.2736	900	356	-0.27133	-0.01567	-0.00034	0.00014	0.918151	0.00577073	1.14871	0.97438	0.0913466
EMSC-20130108_0000044	GR	39.6681	25.5372	TNSA	37.5394	25.1631			SS	11.1303	5.81	238.92	498.109	10	-0.00543	-0.03838	0	-6e-05	-0.346357	-1.22	0.0765731	-0.0488292	-0.603916
EMSC-20130108_0000044	GR	39.6681	25.5372	YDRA	37.3495	23.4653			SS	11.1303	5.81	314.575	693.523	86	-0.04435	0.15921	8e-05	-0.0002	-0.208317	-1.02467	0.0417244	0.352493	-0.753872
EMSC-20130108_0000044	GR	39.6681	25.5372	ENZZ	40.607	26.1406			SS	11.1303	5.81	116.32	377.603	9	0.01099	-0.01243	-2e-05	-2e-05	2.3145	1.31426	2.57212	2.50825	1.52199
EMSC-20130108_0000044	GR	39.6681	25.5372	FOCM	38.7131	26.7309			SS	11.1303	5.81	147.848	553.331	7	-0.0426	-0.00284	-0.0001	1e-05	1.24441	0.203029	1.75442	1.30892	0.871121
EMSC-20130108_0000044	GR	39.6681	25.5372	GMLD	38.0764	26.8747			SS	11.1303	5.81	211.493	506.73	140	-0.02582	-0.03851	2e-05	1e-05	1.24525	0.273236	1.6259	1.2475	0.451441
EMSC-20130108_0000044	GR	39.6681	25.5372	GOKC	40.1998	25.9183			SS	11.1303	5.81	67.463	629.889	143	-0.10552	0.02364	-6e-05	-3e-05	2.19328	1.02908	2.5319	2.27209	1.16314
EMSC-20130108_0000044	GR	39.6681	25.5372	GOMA	38.7077	27.9175			SS	11.1303	5.81	231.266	636.467	132	0.07518	0.04702	-7e-05	-4e-05	0.839857	-0.0710712	1.17736	1.21539	0.375932
EMSC-20130108_0000044	GR	39.6681	25.5372	GPNR	39.4552	26.1329			SS	11.1303	5.81	56.2864	664.563	14	-0.00819	-0.06363	-1e-05	-0.0001	2.01645	0.829693	2.4538	1.84084	1.15816
EMSC-20130108_0000044	GR	39.6681	25.5372	KIYI	41.4844	28.3			SS	11.1303	5.81	308.572	600	1	0.00449	0.00797	-2e-05	-1e-05	1.3006	0.311586	1.77541	1.34358	0.649577
EMSC-20130108_0000044	GR	39.6681	25.5372	KRBN	38.5936	26.5537			SS	11.1303	5.81	148.195	843.228	94	0.08041	0.05121	1e-05	8e-05	1.3452	0.316818	1.77549	1.47269	0.709268
EMSC-20130108_0000044	GR	39.6681	25.5372	ORLT	40.0452	28.8914			SS	11.1303	5.81	289.347	610.21	717	0.06117	-0.07403	0.00015	1e-05	1.27862	0.298417	1.74966	1.49008	0.52124
EMSC-20130108_0000044	GR	39.6681	25.5372	SHAP	39.0231	29.222			SS	11.1303	5.81	324.849	495.541	1009	-0.00572	-0.03743	-0.00018	0	0.694425	-0.287167	1.14704	0.919841	0.119294
EMSC-20130109_0000093	GR	39.6799	25.6353	ALNA	39.148	23.8667			SS	9.9738	4.51	163.036	604.69	8	0.03835	-0.03635	-5e-05	-6e-05	-0.794896	-1.59631	-0.53663	-0.326639	-1.44066
EMSC-20130109_0000093	GR	39.6799	25.6353	EFSA	39.5401	24.9886			SS	9.9738	4.51	57.5341	477.937	20	-0.02705	0.04364	-2e-05	-7e-05	0.23576	-1.02763	0.385197	0.0638168	-0.849924
EMSC-20130109_0000093	GR	39.6799	25.6353	KVLA	40.937	24.3859			SS	9.9738	4.51	175.392	748.058	74	0.06768	-0.09968	-0.0001	-0.00014	-0.671297	-1.89831	-0.21403	-0.760927	-1.75998
EMSC-20130109_0000093	GR	39.6799	25.6353	LIA	39.8972	25.1806			SS	9.9738	4.51	45.7584	464.17	45	0.04683	-0.0177	-3e-05	-1e-05	0.443704	-1.06996	0.489252	-0.136464	-1.14064
EMSC-20130109_0000093	GR	39.6799	25.6353	PLG	40.3733	23.4444			SS	9.9738	4.51	201.844	493.142	535	-0.05298	-0.01891	-1e-05	-1e-05	-1.12715	-2.35116	-0.843083	-1.13428	-2.2295
EMSC-20130109_0000093	GR	39.6799	25.6353	PRK	39.2456	26.265			SS	9.9738	4.51	72.4821	439.853	104	-0.02311	-0.00716	4e-05	3e-05	0.383642	-0.815664	0.790312	0.0620861	-1.13682
EMSC-20130109_0000093	GR	39.6799	25.6353	PSRA	38.5398	25.562			SS	9.9738	4.51	126.933	600	11	-0.00241	-0.0154	5e-05	-2e-05	0.112716	-1.2453	0.487736	-0.354235	-1.3846
EMSC-20130109_0000093	GR	39.6799	25.6353	SMTH	40.4709	25.5304			SS	9.9738	4.51	88.4109	900	356	-0.27133	-0.01567	-0.00034	0.00014	-0.0204228	-1.36834	0.239523	-0.576639	-1.65724
EMSC-20130109_0000093	GR	39.6799	25.6353	ENZZ	40.607	26.1406			SS	9.9738	4.51	111.678	377.603	9	0.01099	-0.01243	-2e-05	-2e-05	1.32111	0.0779628	1.70414	0.991974	-0.118179
EMSC-20130109_0000093	GR	39.6799	25.6353	FOCM	38.7131	26.7309			SS	9.9738	4.51	143.073	553.331	7	-0.0426	-0.00284	-0.0001	1e-05	0.460562	-0.762215	0.938085	0.246526	-0.826546
EMSC-20130109_0000093	GR	39.6799	25.6353	GOKC	40.1998	25.9183			SS	9.9738	4.51	62.6429	629.889	143	-0.10552	0.02364	-6e-05	-3e-05	1.66114	0.100791	1.71861	0.714335	-0.341029
EMSC-20130109_0000093	GR	39.6799	25.6353	GPNR	39.4552	26.1329			SS	9.9738	4.51	49.4321	664.563	14	-0.00819	-0.06363	-1e-05	-0.0001	1.21085	-0.0867439	1.57014	0.733413	-0.406217
EMSC-20130109_0000093	GR	39.6799	25.6353	KRBN	38.5936	26.5537			SS	9.9738	4.51	144.444	843.228	94	0.08041	0.05121	1e-05	8e-05	0.337221	-0.783241	0.937985	0.46135	-0.703199
EMSC-20130111_0000003	GR	39.6679	25.5202	ALNA	39.148	23.8667			SS	14.6228	4.3	153.367	604.69	8	0.03835	-0.03635	-5e-05	-6e-05	-0.543758	-1.58012	-0.122421	-0.539197	-1.5947
EMSC-20130111_0000003	GR	39.6679	25.5202	EFSA	39.5401	24.9886			SS	14.6228	4.3	47.7039	477.937	20	-0.02705	0.04364	-2e-05	-7e-05	0.801889	-0.671412	0.912677	-0.0366271	-1.01075
EMSC-20130111_0000003	GR	39.6679	25.5202	KVLA	40.937	24.3859			SS	14.6228	4.3	170.782	748.058	74	0.06768	-0.09968	-0.0001	-0.00014	-0.538149	-1.88055	0.044146	-1.0932	-2.00813
EMSC-20130111_0000003	GR	39.6679	25.5202	LIA	39.8972	25.1806			SS	14.6228	4.3	38.6359	464.17	45	0.04683	-0.0177	-3e-05	-1e-05	0.510559	-0.938847	0.870553	-0.229909	-1.20787
EMSC-20130111_0000003	GR	39.6679	25.5202	PLG	40.3733	23.4444			SS	14.6228	4.3	193.375	493.142	535	-0.05298	-0.01891	-1e-05	-1e-05	-1.12383	-2.38416	-0.528902	-1.47709	-2.42941
EMSC-20130111_0000003	GR	39.6679	25.5202	PRK	39.2456	26.265			SS	14.6228	4.3	79.3294	439.853	104	-0.02311	-0.00716	4e-05	3e-05	0.0145513	-1.20934	0.413076	-0.243317	-1.49445
EMSC-20130111_0000003	GR	39.6679	25.5202	PSRA	38.5398	25.562			SS	14.6228	4.3	125.493	600	11	-0.00241	-0.0154	5e-05	-2e-05	0.119819	-1.31303	0.601686	-0.660706	-1.49066
EMSC-20130111_0000003	GR	39.6679	25.5202	SMTH	40.4709	25.5304			SS	14.6228	4.3	89.2982	900	356	-0.27133	-0.01567	-0.00034	0.00014	-0.305056	-1.6681	-0.0554226	-0.70623	-1.71982
EMSC-20130111_0000003	GR	39.6679	25.5202	FOCM	38.7131	26.7309			SS	14.6228	4.3	148.855	553.331	7	-0.0426	-0.00284	-0.0001	1e-05	0.132271	-1.13504	0.653093	-0.0950374	-1.27082
EMSC-20130111_0000003	GR	39.6679	25.5202	GOKC	40.1998	25.9183			SS	14.6228	4.3	68.1923	629.889	143	-0.10552	0.02364	-6e-05	-3e-05	0.760542	-0.565013	0.965776	0.58398	-0.807474
EMSC-20130111_0000003	GR	39.6679	25.5202	GPNR	39.4552	26.1329			SS	14.6228	4.3	57.6028	664.563	14	-0.00819	-0.06363	-1e-05	-0.0001	0.762801	-0.602228	1.2284	0.19915	-0.894973
EMSC-20130111_0000003	GR	39.6679	25.5202	KRBN	38.5936	26.5537			SS	14.6228	4.3	149.05	843.228	94	0.08041	0.05121	1e-05	8e-05	0.131125	-0.920238	0.504691	0.252558	-1.03618
EMSC-20130113_0000030	GR	39.6705	25.5511	ALNA	39.148	23.8667			SS	15.384	4.5	155.934	604.69	8	0.03835	-0.03635	-5e-05	-6e-05	-0.325898	-1.31273	-0.0959015	-0.0865466	-1.24795
EMSC-20130113_0000030	GR	39.6705	25.5511	EFSA	39.5401	24.9886			SS	15.384	4.5	50.3189	477.937	20	-0.02705	0.04364	-2e-05	-7e-05	0.880777	-0.441484	1.08966	0.353808	-0.66037
EMSC-20130113_0000030	GR	39.6705	25.5511	KVLA	40.937	24.3859			SS	15.384	4.5	172.034	748.058	74	0.06768	-0.09968	-0.0001	-0.00014	-0.485432	-1.74666	-0.0685136	-0.960584	-1.70723
EMSC-20130113_0000030	GR	39.6705	25.5511	LIA	39.8972	25.1806			SS	15.384	4.5	40.4756	464.17	45	0.04683	-0.0177	-3e-05	-1e-05	0.622058	-0.890349	0.825035	0.0975793	-1.10944
EMSC-20130113_0000030	GR	39.6705	25.5511	PLG	40.3733	23.4444			SS	15.384	4.5	195.664	493.142	535	-0.05298	-0.01891	-1e-05	-1e-05	-0.97288	-2.1562	-0.371331	-1.15577	-2.19714
EMSC-20130113_0000030	GR	39.6705	25.5511	PRK	39.2456	26.265			SS	15.384	4.5	77.3823	439.853	104	-0.02311	-0.00716	4e-05	3e-05	0.346307	-0.940162	0.657537	-0.00312803	-1.1942
EMSC-20130113_0000030	GR	39.6705	25.5511	PSRA	38.5398	25.562			SS	15.384	4.5	125.734	600	11	-0.00241	-0.0154	5e-05	-2e-05	0.19376	-1.12968	0.574392	-0.320797	-1.25794
EMSC-20130113_0000030	GR	39.6705	25.5511	SMTH	40.4709	25.5304			SS	15.384	4.5	89.0222	900	356	-0.27133	-0.01567	-0.00034	0.00014	0.0267245	-1.21013	0.25167	-0.267749	-1.32911
EMSC-20130113_0000030	GR	39.6705	25.5511	ENZZ	40.607	26.1406			SS	15.384	4.5	115.563	377.603	9	0.01099	-0.01243	-2e-05	-2e-05	1.0811	0.0424131	1.53333	1.18536	-0.0760082
EMSC-20130113_0000030	GR	39.6705	25.5511	FOCM	38.7131	26.7309			SS	15.384	4.5	147.208	553.331	7	-0.0426	-0.00284	-0.0001	1e-05	0.26006	-0.962708	0.764857	0.207324	-0.884838
EMSC-20130113_0000030	GR	39.6705	25.5511	GMLD	38.0764	26.8747			SS	15.384	4.5	211.06	506.73	140	-0.02582	-0.03851	2e-05	1e-05	0.301922	-0.798095	0.635513	0.161501	-0.991995
EMSC-20130113_0000030	GR	39.6705	25.5511	GOKC	40.1998	25.9183			SS	15.384	4.5	66.6643	629.889	143	-0.10552	0.02364	-6e-05	-3e-05	1.05561	-0.34389	1.27875	0.829045	-0.456005
EMSC-20130113_0000030	GR	39.6705	25.5511	GONE	40.0466	27.686			SS	15.384	4.5	186.96	440.139	144	-0.03639	0.04445	-0.00014	-2e-05	0.238128	-0.80686	0.507219	0.384516	-0.559167
EMSC-20130113_0000030	GR	39.6705	25.5511	GPNR	39.4552	26.1329			SS	15.384	4.5	55.3218	664.563	14	-0.00819	-0.06363	-1e-05	-0.0001	1.16762	-0.287564	1.36004	0.377201	-0.579689
EMSC-20130113_0000030	GR	39.6705	25.5511	KRBN	38.5936	26.5537			SS	15.384	4.5	147.705	843.228	94	0.08041	0.05121	1e-05	8e-05	0.437866	-0.628588	0.86896	0.58336	-0.648015
EMSC-20130125_0000039	IT	44.1643	10.4458	ASOL	45.8003	11.9023			SS	19.8	4.8	214.97	440.904	176.474	0.11058	-0.14179	0.00258	0.00239	-0.321019	-1.45773	0.211956	-0.19514	-1.29619
EMSC-20130125_0000039	IT	44.1643	10.4458	ATLO	43.3152	12.4073			SS	19.8	4.8	183.693	454.898	607.391	0.02033	-0.14725	0.00216	-0.00041	-0.77398	-1.67661	-0.428137	-0.468063	-1.02659
EMSC-20130125_0000039	IT	44.1643	10.4458	BAG8	45.8228	10.4664			SS	19.8	4.8	184.424	522.233	789.394	-0.26316	-0.18155	-0.00017	0.00155	-0.450578	-1.61915	-0.0358255	-0.403011	-1.69589
EMSC-20130125_0000039	IT	44.1643	10.4458	BDI	44.0624	10.597			SS	19.8	4.8	16.5557	504.646	821.694	-0.21538	-0.18448	-0.00098	-0.00084	2.01089	0.4787	1.9282	1.19246	0.108786
EMSC-20130125_0000039	IT	44.1643	10.4458	BOB	44.7679	9.4478			SS	19.8	4.8	103.811	557.922	929.946	0.26158	-0.16552	-0.00149	-0.00382	-0.00409021	-1.16095	0.391718	0.0520682	-1.17364
EMSC-20130125_0000039	IT	44.1643	10.4458	CAFI	43.3292	11.9663			SS	19.8	4.8	153.424	475.706	540.082	-0.14887	0.01784	-0.00076	0.00226	-0.728944	-1.66568	-0.377605	-0.506043	-1.05338
EMSC-20130125_0000039	IT	44.1643	10.4458	CDCA	43.4584	12.2336	277	P	SS	19.8	4.8	163.519	277	268.952	0.02704	-0.0057	-0.00087	-0.00099	-0.179022	-1.06859	0.145468	0.103915	-0.665004
EMSC-20130125_0000039	IT	44.1643	10.4458	CNCS	45.606	10.217			SS	19.8	4.8	161.32	393.024	213.925	-0.01103	-0.035	-0.0011	0	0.187225	-0.952828	0.634378	0.101062	-1.10653
EMSC-20130125_0000039	IT	44.1643	10.4458	CPGN	43.8011	12.3205			SS	19.8	4.8	155.333	424.463	1400.91	-0.01805	0.0233	0.0011	-0.00113	-0.661567	-1.49754	-0.341189	-0.313024	-0.98501
EMSC-20130125_0000039	IT	44.1643	10.4458	CRMI	43.7956	10.9795			SS	19.8	4.8	59.1976	431.603	537.856	0.11787	0.09594	0.00208	0.00043	0.608815	-0.769435	0.785484	0.119739	-0.78838
EMSC-20130125_0000039	IT	44.1643	10.4458	FAEN	44.2895	11.877			SS	19.8	4.8	114.884	316.705	36.187	0.02338	-0.01464	-0.00099	-0.00094	0.0484757	-0.902827	0.379157	0.362174	-0.430771
EMSC-20130125_0000039	IT	44.1643	10.4458	FIR	43.7744	11.2551			SS	19.8	4.8	77.9378	334.035	70.107	0.06345	-0.03827	-0.00116	0.0017	0.764592	-0.363326	1.08843	0.49706	-0.471307
EMSC-20130125_0000039	IT	44.1643	10.4458	MERA	45.7054	9.4291			SS	19.8	4.8	189.125	372.412	331.717	-0.02502	-0.03108	0.00182	-0.00089	-0.0579961	-1.25215	0.3597	-0.468327	-1.49769
EMSC-20130125_0000039	IT	44.1643	10.4458	MGAB	42.9126	12.1121			SS	19.8	4.8	193.414	411.579	483.14	-0.16097	-0.11163	0.00053	0.00103	-0.829243	-1.74493	-0.462156	-0.62143	-1.13345
EMSC-20130125_0000039	IT	44.1643	10.4458	MILN	45.4803	9.2321			SS	19.8	4.8	174.856	412.077	131.554	-0.08849	0.03263	0.0001	0.00234	-0.384227	-1.5876	0.111182	-0.473736	-1.336
EMSC-20130125_0000039	IT	44.1643	10.4458	MMUR	43.4418	12.9973			SS	19.8	4.8	219.946	458.406	771.879	0.07685	-0.01564	-0.0002	0.00147	-0.606743	-1.80809	-0.122816	-0.649993	-1.31086
EMSC-20130125_0000039	IT	44.1643	10.4458	MNTV	45.1495	10.7897	237	P	SS	19.8	4.8	112.875	237	30.014	-0.07567	0.00607	0.00108	0.00154	-0.0708891	-1.08134	0.410674	0.172846	-0.779181
EMSC-20130125_0000039	IT	44.1643	10.4458	MODE	44.6297	10.9492			SS	19.8	4.8	65.4037	240.038	33.828	0.05655	0.04132	-0.00057	-0.00068	0.924622	-0.181837	1.33448	0.8813	0.103944
EMSC-20130125_0000039	IT	44.1643	10.4458	MPAG	43.6292	12.7595			SS	19.8	4.8	194.694	415.891	935.536	0.02284	0.04706	0.00165	-0.00018	-0.917797	-1.81515	-0.537697	-0.597089	-1.27369
EMSC-20130125_0000039	IT	44.1643	10.4458	MTRZ	44.3128	11.4248			SS	19.8	4.8	79.72	427.492	578.567	0.01429	0.05451	0.00485	0.00268	0.110271	-0.864246	0.442471	0.506316	-0.594213
EMSC-20130125_0000039	IT	44.1643	10.4458	MURB	43.263	12.5246			SS	19.8	4.8	194.821	454.824	825.704	0.03862	-0.02426	0.00294	-0.00013	-0.17793	-1.35803	0.436671	-0.219221	-0.871096
EMSC-20130125_0000039	IT	44.1643	10.4458	NEVI	44.5834	10.3163			SS	19.8	4.8	47.7249	411.579	523.335	-0.00747	0.11108	0.00073	0.00348	0.840896	-0.308265	1.35579	0.681987	-0.283508
EMSC-20130125_0000039	IT	44.1643	10.4458	OPPE	45.3082	11.1724	264	P	SS	19.8	4.8	139.543	264	22.79	-0.03814	-0.02095	-9e-05	0.00067	-0.119239	-1.11799	0.274213	0.0895079	-0.861767
EMSC-20130125_0000039	IT	44.1643	10.4458	ORZI	45.4056	9.9307			SS	19.8	4.8	143.887	251.796	79.687	-0.00735	-0.00213	0.00169	0.00054	-0.260068	-1.11235	0.277396	0.0170608	-0.634393
EMSC-20130125_0000039	IT	44.1643	10.4458	SACS	42.8491	11.9097			SS	19.8	4.8	187.947	411.579	773.995	-0.0431	-0.11795	0.00187	0.00123	-1.07681	-1.80643	-0.716037	-0.835089	-1.2227
EMSC-20130125_0000039	IT	44.1643	10.4458	SANR	45.64	11.61	321	P-MASW	SS	19.8	4.8	187.963	321	39.486	-0.03085	0.09512	-0.00038	-0.00046	-0.239017	-1.24436	0.167234	-0.0432072	-1.14758
EMSC-20130125_0000039	IT	44.1643	10.4458	SBPO	45.0511	10.9199			SS	19.8	4.8	105.508	244.382	21.883	0.01604	-0.04663	-0.00097	0.00235	0.345019	-0.846321	0.747325	0.0720056	-0.838258
EMSC-20130125_0000039	IT	44.1643	10.4458	SFI	43.9048	11.847			SS	19.8	4.8	115.668	495.868	540.654	-0.2643	0.11011	0.00058	-0.00174	-0.237112	-1.22075	0.195066	0.102014	-0.974476
EMSC-20130125_0000039	IT	44.1643	10.4458	SSFR	43.4363	12.7822			SS	19.8	4.8	204.227	465.494	753.172	-0.04884	-0.06173	0.00075	0.00157	-0.533708	-1.81558	-0.16041	-0.789626	-1.19536
EMSC-20130125_0000039	IT	44.1643	10.4458	T0813	44.8778	11.1992			SS	19.8	4.8	99.3075	191.087	6.682	-0.03671	-0.03493	0.00037	0.00196	0.140974	-0.879029	0.555382	0.31067	-0.583084
EMSC-20130125_0000039	IT	44.1643	10.4458	T0819	44.8873	10.8987	208	ESAC	SS	19.8	4.8	88.0464	208	18	0.04882	0.01048	-0.00124	-0.00031	-0.0330337	-0.950725	0.426165	0.0280328	-0.82568
EMSC-20130125_0000039	IT	44.1643	10.4458	VOBA	45.6429	10.504			SS	19.8	4.8	164.477	390.88	235.565	-0.02126	0.17851	0.0004	0.00016	0.172118	-0.950811	0.667828	0.123049	-1.1437
EMSC-20130125_0000039	IT	44.1643	10.4458	ZCCA	44.3509	10.9765			SS	19.8	4.8	47.0803	442.879	707.609	-0.07196	-0.05112	-0.00136	0.00678	0.61676	-0.347196	1.05193	0.858013	-0.141597
EMSC-20130125_0000039	IT	44.1643	10.4458	ZEN8	45.6378	10.7319			SS	19.8	4.8	165.388	492.599	598.335	0.01707	-0.15042	0.00168	-0.00048	-0.496412	-1.60518	-0.247716	-0.628598	-1.5987
EMSC-20130125_0000039	IT	44.1643	10.4458	ZOVE	45.4536	11.4876			SS	19.8	4.8	165.247	498.245	373.619	0.16646	0.01113	0.00037	0.00079	-0.364874	-1.51157	0.115098	-0.398896	-1.46477
EMSC-20130125_0000039	IT	44.1643	10.4458	VLC	44.1594	10.3864			SS	19.8	4.8	4.76947	457.239	511.88	0.09003	0.10514	-0.00221	-0.00028	1.36859	0.119839	1.39755	1.36077	0.203735
EMSC-20130215_0000048	GR	40.3588	23.9444	ALNA	39.148	23.8667			SS	8.7268	4.5	134.794	604.69	8	0.03835	-0.03635	-5e-05	-6e-05	-0.328223	-1.28996	-0.0320191	-0.0182668	-1.16973
EMSC-20130215_0000048	GR	40.3588	23.9444	EFSA	39.5401	24.9886			SS	8.7268	4.5	127.316	477.937	20	-0.02705	0.04364	-2e-05	-7e-05	-0.552486	-1.64655	-0.200129	-0.551774	-1.32737
EMSC-20130215_0000048	GR	40.3588	23.9444	KVLA	40.937	24.3859			SS	8.7268	4.5	74.3073	748.058	74	0.06768	-0.09968	-0.0001	-0.00014	0.587566	-1.03705	0.650776	-0.53591	-1.44854
EMSC-20130215_0000048	GR	40.3588	23.9444	LIA	39.8972	25.1806			SS	8.7268	4.5	116.958	464.17	45	0.04683	-0.0177	-3e-05	-1e-05	-0.185641	-1.34615	0.202748	-0.182827	-1.36246
EMSC-20130215_0000048	GR	40.3588	23.9444	PLG	40.3733	23.4444			SS	8.7268	4.5	42.3889	493.142	535	-0.05298	-0.01891	-1e-05	-1e-05	0.971174	-0.559038	1.12682	0.119112	-0.783442
EMSC-20130215_0000048	GR	40.3588	23.9444	SMTH	40.4709	25.5304			SS	8.7268	4.5	134.852	900	356	-0.27133	-0.01567	-0.00034	0.00014	-0.119175	-1.41559	0.3079	-0.591606	-1.66768
EMSC-20130215_0000048	GR	40.3588	23.9444	ENZZ	40.607	26.1406			SS	8.7268	4.5	187.777	377.603	9	0.01099	-0.01243	-2e-05	-2e-05	0.676585	-0.352847	1.08126	0.720156	-0.329167
EMSC-20130217_0000022	GR	36.655	21.6092	ANKY	35.867	23.3012			TF	33.5684	5.09	175.182	619.572	100	-0.0098	0.05556	-0.00012	-3e-05	-0.434787	-1.31634	0.00818531	0.105917	-1.02918
EMSC-20130217_0000022	GR	36.655	21.6092	ITM	37.1787	21.9252			TF	33.5684	5.09	64.6576	844.349	512	-0.01976	-0.08096	0.00025	3e-05	0.198589	-1.02819	0.572212	0.106286	-0.790066
EMSC-20130217_0000022	GR	36.655	21.6092	MNVA	36.6871	23.0373			TF	33.5684	5.09	127.42	883.644	11	0.09264	0.03325	-0.00021	-4e-05	-0.359537	-1.36586	0.017803	-0.14959	-1.01597
EMSC-20130217_0000022	GR	36.655	21.6092	YDRA	37.3495	23.4653			TF	33.5684	5.09	182.012	693.523	86	-0.04435	0.15921	8e-05	-0.0002	-0.524078	-1.46666	-0.15981	-0.226293	-1.03228
EMSC-20130217_0000067	GR	40.7756	21.394	JAN	39.6562	20.8487			NF	8.1679	4.1	132.807	435.911	515	0.01206	-0.02499	3e-05	1e-05	-1.19626	-2.37236	-0.729573	-1.41028	-2.1909
EMSC-20130217_0000067	GR	40.7756	21.394	KASA	39.7463	19.9354			NF	8.1679	4.1	168.572	900	41	0.09573	-0.04553	-0.00012	1e-05	-1.25307	-2.26894	-0.591368	-1.06831	-2.02252
EMSC-20130221_0000039	GR	37.3694	26.9293	AMGA	36.8316	25.8938			SS	6.9583	4.5	109.588	625.424	282	-0.01177	-0.0446	0.00022	3e-05	-0.355057	-1.48808	-0.0144991	-0.366967	-1.15887
EMSC-20130221_0000039	GR	37.3694	26.9293	PRK	39.2456	26.265			SS	6.9583	4.5	216.53	439.853	104	-0.02311	-0.00716	4e-05	3e-05	-0.881774	-1.86831	-0.488517	-0.533975	-1.74924
EMSC-20130221_0000039	GR	37.3694	26.9293	PSRA	38.5398	25.562			SS	6.9583	4.5	176.935	600	11	-0.00241	-0.0154	5e-05	-2e-05	-0.65416	-2.01409	-0.320166	-1.2545	-1.87248
EMSC-20130221_0000039	GR	37.3694	26.9293	TNSA	37.5394	25.1631			SS	6.9583	4.5	157.043	498.109	10	-0.00543	-0.03838	0	-6e-05	-0.379933	-1.89544	-0.199855	-1.04658	-1.86079
EMSC-20130221_0000039	GR	37.3694	26.9293	AKS	38.8785	27.8129			SS	6.9583	4.5	184.747	541.408	331	0.04978	0.04567	0.00012	0.00025	-0.135515	-1.09468	0.42082	0.00935742	-0.899839
EMSC-20130221_0000039	GR	37.3694	26.9293	DENT	37.7539	29.0331			SS	6.9583	4.5	190.298	900	656	0.06213	0.12068	2e-05	-6e-05	-0.242968	-1.36477	0.179456	-0.221882	-1.10043
EMSC-20130221_0000039	GR	37.3694	26.9293	DIDI	37.3767	27.2398			SS	6.9583	4.5	27.4498	315.946	47	-0.01473	0.00554	0	3e-05	2.02466	0.565208	2.31569	1.46566	0.41941
EMSC-20130221_0000039	GR	37.3694	26.9293	FOCM	38.7131	26.7309			SS	6.9583	4.5	150.419	553.331	7	-0.0426	-0.00284	-0.0001	1e-05	-0.0519355	-1.31288	0.174502	-0.0605389	-1.07488
EMSC-20130221_0000039	GR	37.3694	26.9293	GMLD	38.0764	26.8747			SS	6.9583	4.5	78.7613	506.73	140	-0.02582	-0.03851	2e-05	1e-05	1.16749	-0.17459	1.39065	0.965172	-0.245107
EMSC-20130221_0000039	GR	37.3694	26.9293	GOMA	38.7077	27.9175			SS	6.9583	4.5	172.145	636.467	132	0.07518	0.04702	-7e-05	-4e-05	0.0424037	-1.05957	0.553561	0.101246	-0.951933
EMSC-20130221_0000039	GR	37.3694	26.9293	KRBN	38.5936	26.5537			SS	6.9583	4.5	140.048	843.228	94	0.08041	0.05121	1e-05	8e-05	0.274636	-0.977056	0.62258	0.227176	-0.902112
EMSC-20130221_0000039	GR	37.3694	26.9293	MRSB	36.7161	28.1969			SS	6.9583	4.5	133.917	732.254	433	0.02065	0.05366	0.00022	-0.00037	0.46274	-0.608007	0.883776	0.462862	-0.597842
EMSC-20130221_0000039	GR	37.3694	26.9293	YKAV	37.1246	27.2801			SS	6.9583	4.5	41.2931	461.977	23	0.02211	-0.02852	1e-05	-1e-05	1.42795	0.15233	1.77493	0.904812	-0.0996642
EMSC-20130311_0000091	GR	38.6291	21.0512	DLFA	38.4784	22.4956			NF	13.2568	4.11	126.715	900	511	-0.01822	-0.37187	0.00018	-0.00012	-1.41575	-2.45987	-0.96123	-1.12377	-2.0829
EMSC-20130311_0000091	GR	38.6291	21.0512	ITM	37.1787	21.9252			NF	13.2568	4.11	178.575	844.349	512	-0.01976	-0.08096	0.00025	3e-05	-1.48769	-2.38047	-1.06349	-1.31678	-2.06552
EMSC-20130311_0000091	GR	38.6291	21.0512	JAN	39.6562	20.8487			NF	13.2568	4.11	115.531	435.911	515	0.01206	-0.02499	3e-05	1e-05	-0.84967	-1.99985	-0.345742	-0.82525	-1.96807
EMSC-20130311_0000091	GR	38.6291	21.0512	KASA	39.7463	19.9354			NF	13.2568	4.11	157.093	900	41	0.09573	-0.04553	-0.00012	1e-05	-1.20463	-2.42743	-0.668752	-1.26543	-2.12459
EMSC-20130311_0000091	GR	38.6291	21.0512	MGNA	38.6561	20.7912			NF	13.2568	4.11	22.7824	411.497	65	0.03929	0.00081	-1e-05	8e-05	0.444488	-1.09606	0.479369	-0.131725	-1.33767
EMSC-20130324_0000133	IT	37.8729	16.4612	CELI	39.4027	16.5088			SS	32.231	4.56	170.156	494.642	1243.76	-0.0776	0.12593	0.00083	0.00178	-1.51342	-2.69023	-0.962907	-1.54664	-2.34473
EMSC-20130324_0000133	IT	37.8729	16.4612	PIPA	39.4851	16.8158			SS	32.231	4.56	181.891	465.276	416.482	0.14304	-0.1633	0.00539	-0.00247	-0.913003	-2.40074	-0.625197	-1.52678	-2.10692
EMSC-20130324_0000133	IT	37.8729	16.4612	SALB	39.8772	16.3459			SS	32.231	4.56	223.091	502.345	1132.22	-0.06429	-0.23787	0.00504	0.00431	-1.51569	-2.79143	-0.976066	-1.90831	-2.5546
EMSC-20130324_0000133	IT	37.8729	16.4612	CEL	38.2603	15.8939			SS	32.231	4.56	65.7421	533.959	639.022	0.13038	-0.416	0.00255	-0.00228	-0.446811	-1.78426	-0.0288126	-0.822421	-1.76238
EMSC-20130324_0000133	IT	37.8729	16.4612	TIP	39.1794	16.7583			SS	32.231	4.56	147.557	533.388	776.877	0.22392	0.14522	-0.00153	-0.00412	-1.73978	-2.83447	-1.3041	-1.70154	-2.40555
EMSC-20130406_0000089	GR	34.8226	24.1079	IMMV	35.4599	23.9802			TF	32.0687	5.2	71.8094	795.072	188	-0.02677	0.13844	6e-05	-0.00015	0.680929	-0.601608	1.15446	0.460799	-0.597971
EMSC-20130406_0000089	GR	34.8226	24.1079	ANKY	35.867	23.3012			TF	32.0687	5.2	137.263	619.572	100	-0.0098	0.05556	-0.00012	-3e-05	-0.282554	-1.25412	0.173074	0.0230064	-0.742115
EMSC-20130406_0000089	GR	34.8226	24.1079	GVD	34.8391	24.0874			TF	32.0687	5.2	2.62496	669.155	186	0.07511	0.04868	-4e-05	1e-05	2.18237	0.748827	2.45865	1.36985	0.507684
EMSC-20130406_0000089	GR	34.8226	24.1079	IACM	35.3058	25.0709			TF	32.0687	5.2	102.804	395.328	66	-0.00016	0.02528	-0.00012	-1e-05	0.852694	-0.0830294	1.31183	1.0796	-0.131131
EMSC-20130406_0000089	GR	34.8226	24.1079	IMMV	35.4599	23.9802			TF	32.0687	5.2	71.8094	795.072	188	-0.02677	0.13844	6e-05	-0.00015	0.680928	-0.601608	1.15446	0.460799	-0.597971
EMSC-20130406_0000089	GR	34.8226	24.1079	ITM	37.1787	21.9252			TF	32.0687	5.2	327.376	844.349	512	-0.01976	-0.08096	0.00025	3e-05	-1.23019	-1.96797	-0.989039	-1.12993	-1.1666
EMSC-20130406_0000089	GR	34.8226	24.1079	MNVA	36.6871	23.0373			TF	32.0687	5.2	228.719	883.644	11	0.09264	0.03325	-0.00021	-4e-05	-1.10614	-1.9837	-0.63456	-0.800355	-1.25719
EMSC-20130406_0000089	GR	34.8226	24.1079	TNSA	37.5394	25.1631			TF	32.0687	5.2	316.587	498.109	10	-0.00543	-0.03838	0	-6e-05	-1.29212	-2.24536	-0.828928	-0.933923	-1.71116
EMSC-20130406_0000089	GR	34.8226	24.1079	YDRA	37.3495	23.4653			TF	32.0687	5.2	286.845	693.523	86	-0.04435	0.15921	8e-05	-0.0002	-0.936184	-1.86364	-0.549277	-0.800155	-1.20757
EMSC-20130406_0000089	GR	34.8226	24.1079	ZKR	35.1147	26.217			TF	32.0687	5.2	194.903	745.462	201	0.10514	-0.01014	-0.00019	-4e-05	-0.449973	-1.31631	-0.0243742	-0.0761178	-0.872522
EMSC-20130409_0000010	GR	36.5011	23.0159	IMMV	35.4599	23.9802			NF	17.9908	4.74	144.681	795.072	188	-0.02677	0.13844	6e-05	-0.00015	-0.0757052	-1.2231	0.474991	-0.124079	-1.36242
EMSC-20130409_0000010	GR	36.5011	23.0159	ANKY	35.867	23.3012			NF	17.9908	4.74	75.0088	619.572	100	-0.0098	0.05556	-0.00012	-3e-05	0.400366	-0.775659	0.838436	0.349076	-1.00245
EMSC-20130409_0000010	GR	36.5011	23.0159	DION	38.0779	23.9331			NF	17.9908	4.74	193.196	688.95	411	0.01094	0.09892	-3e-05	-0.00012	-0.641874	-1.79341	-0.190175	-0.578766	-1.62187
EMSC-20130409_0000010	GR	36.5011	23.0159	GVD	34.8391	24.0874			NF	17.9908	4.74	208.61	669.155	186	0.07511	0.04868	-4e-05	1e-05	-0.46854	-1.61811	0.0719936	-0.583141	-1.70178
EMSC-20130409_0000010	GR	36.5011	23.0159	IMMV	35.4599	23.9802			NF	17.9908	4.74	144.681	795.072	188	-0.02677	0.13844	6e-05	-0.00015	-0.0757052	-1.2231	0.474991	-0.124079	-1.36242
EMSC-20130409_0000010	GR	36.5011	23.0159	ITM	37.1787	21.9252			NF	17.9908	4.74	122.873	844.349	512	-0.01976	-0.08096	0.00025	3e-05	-0.0399236	-1.27791	0.349267	-0.30385	-1.33143
EMSC-20130409_0000010	GR	36.5011	23.0159	MNVA	36.6871	23.0373			NF	17.9908	4.74	20.7695	883.644	11	0.09264	0.03325	-0.00021	-4e-05	1.10338	-0.263717	1.1171	0.737383	-0.323313
EMSC-20130409_0000010	GR	36.5011	23.0159	NOAC	37.9738	23.7177			NF	17.9908	4.74	175.148	434.005	96	-0.02322	0.00027	5e-05	6e-05	-0.376652	-1.57148	0.0812314	-0.41661	-1.49041
EMSC-20130409_0000010	GR	36.5011	23.0159	YDRA	37.3495	23.4653			NF	17.9908	4.74	102.443	693.523	86	-0.04435	0.15921	8e-05	-0.0002	0.410304	-0.864069	0.752264	-0.163672	-1.1999
EMSC-20130423_0000005	GR	38.3446	20.5062	DLFA	38.4784	22.4956			SS	11.6346	4.54	173.97	900	511	-0.01822	-0.37187	0.00018	-0.00012	-1.34556	-2.3612	-0.923943	-0.941774	-2.08246
EMSC-20130423_0000005	GR	38.3446	20.5062	ITM	37.1787	21.9252			SS	11.6346	4.54	179.903	844.349	512	-0.01976	-0.08096	0.00025	3e-05	-1.11445	-2.27551	-0.648732	-1.19182	-1.9641
EMSC-20130423_0000005	GR	38.3446	20.5062	JAN	39.6562	20.8487			SS	11.6346	4.54	148.812	435.911	515	0.01206	-0.02499	3e-05	1e-05	-0.918216	-2.07485	-0.593818	-0.868698	-1.71705
EMSC-20130423_0000005	GR	38.3446	20.5062	KASA	39.7463	19.9354			SS	11.6346	4.54	163.467	900	41	0.09573	-0.04553	-0.00012	1e-05	-1.01512	-2.36033	-0.640166	-1.29792	-2.03472
EMSC-20130423_0000005	GR	38.3446	20.5062	MGNA	38.6561	20.7912			SS	11.6346	4.54	42.5952	411.497	65	0.03929	0.00081	-1e-05	8e-05	0.627076	-0.943927	0.675807	-0.303516	-1.16149
EMSC-20130424_0000072	GR	36.7385	22.9545	IMMV	35.4599	23.9802			SS	16.8151	4.33	169.425	795.072	188	-0.02677	0.13844	6e-05	-0.00015	-0.800598	-2.0271	-0.395381	-0.934435	-2.09095
EMSC-20130424_0000072	GR	36.7385	22.9545	ANKY	35.867	23.3012			SS	16.8151	4.33	101.76	619.572	100	-0.0098	0.05556	-0.00012	-3e-05	-0.359787	-1.75732	0.0162816	-0.873219	-2.00099
EMSC-20130424_0000072	GR	36.7385	22.9545	DION	38.0779	23.9331			SS	16.8151	4.33	172.198	688.95	411	0.01094	0.09892	-3e-05	-0.00012	-1.09288	-2.39373	-0.617797	-1.32888	-2.55294
EMSC-20130424_0000072	GR	36.7385	22.9545	DLFA	38.4784	22.4956			SS	16.8151	4.33	197.642	900	511	-0.01822	-0.37187	0.00018	-0.00012	-1.26851	-2.50573	-0.959815	-1.3786	-2.48522
EMSC-20130424_0000072	GR	36.7385	22.9545	ITM	37.1787	21.9252			SS	16.8151	4.33	103.729	844.349	512	-0.01976	-0.08096	0.00025	3e-05	-0.774553	-2.21744	-0.394149	-1.17062	-2.01411
EMSC-20130424_0000072	GR	36.7385	22.9545	MNVA	36.6871	23.0373			SS	16.8151	4.33	9.3384	883.644	11	0.09264	0.03325	-0.00021	-4e-05	1.02618	-0.449845	1.14023	0.217903	-0.702985
EMSC-20130424_0000072	GR	36.7385	22.9545	NOAC	37.9738	23.7177			SS	16.8151	4.33	153.03	434.005	96	-0.02322	0.00027	5e-05	6e-05	-0.828707	-2.16998	-0.298422	-1.28528	-2.23762
EMSC-20130424_0000072	GR	36.7385	22.9545	TNSA	37.5394	25.1631			SS	16.8151	4.33	215.071	498.109	10	-0.00543	-0.03838	0	-6e-05	-1.14733	-2.66121	-0.964505	-1.793	-2.62347
EMSC-20130424_0000072	GR	36.7385	22.9545	YDRA	37.3495	23.4653			SS	16.8151	4.33	81.6733	693.523	86	-0.04435	0.15921	8e-05	-0.0002	0.0400836	-1.44774	0.434876	-0.897533	-1.86547
EMSC-20130516_0000002	TR	36.9935	28.4128	AMGA	36.8316	25.8938			NF	16.6167	5	224.669	625.424	282	-0.01177	-0.0446	0.00022	3e-05	-1.31117	-2.04626	-1.04228	-1.12327	-1.30414
EMSC-20130516_0000002	TR	36.9935	28.4128	KSL	36.1503	29.5856			NF	16.6167	5	140.567	557.733	102	0.0315	0.04718	0.00018	-5e-05	-0.352025	-1.28961	0.0295636	-0.179719	-0.855635
EMSC-20130516_0000002	TR	36.9935	28.4128	PRK	39.2456	26.265			NF	16.6167	5	313.053	439.853	104	-0.02311	-0.00716	4e-05	3e-05	-1.18802	-1.97065	-0.902184	-0.643724	-1.35157
EMSC-20130516_0000002	TR	36.9935	28.4128	PSRA	38.5398	25.562			NF	16.6167	5	303.876	600	11	-0.00241	-0.0154	5e-05	-2e-05	-1.64031	-2.41407	-1.21264	-1.43922	-1.47815
EMSC-20130516_0000002	TR	36.9935	28.4128	TNSA	37.5394	25.1631			NF	16.6167	5	293.893	498.109	10	-0.00543	-0.03838	0	-6e-05	-1.37875	-2.33571	-0.963085	-1.01099	-1.70978
EMSC-20130516_0000002	TR	36.9935	28.4128	ZKR	35.1147	26.217			NF	16.6167	5	287.4	745.462	201	0.10514	-0.01014	-0.00019	-4e-05	-1.31281	-2.16778	-0.968085	-1.0351	-1.58186
EMSC-20130516_0000002	TR	36.9935	28.4128	AKS	38.8785	27.8129			NF	16.6167	5	216.103	541.408	331	0.04978	0.04567	0.00012	0.00025	-0.262724	-1.07019	0.230943	0.0144	-0.567779
EMSC-20130516_0000002	TR	36.9935	28.4128	BBRN	36.6797	28.0587			NF	16.6167	5	47.0168	511.8	46	0.00436	-0.04569	-3e-05	-2e-05	1.23464	-0.241989	1.50664	0.502066	0.230919
EMSC-20130516_0000002	TR	36.9935	28.4128	DATC	36.7584	27.6602			NF	16.6167	5	71.866	436.096	82	0.02251	-0.00919	3e-05	4e-05	1.1942	0.0910809	1.55803	1.20547	0.656308
EMSC-20130516_0000002	TR	36.9935	28.4128	DENT	37.7539	29.0331			NF	16.6167	5	100.765	900	656	0.06213	0.12068	2e-05	-6e-05	0.711022	-0.319303	1.0838	0.834665	0.198256
EMSC-20130516_0000002	TR	36.9935	28.4128	DIDI	37.3767	27.2398			NF	16.6167	5	112.309	315.946	47	-0.01473	0.00554	0	3e-05	0.625836	-0.199365	1.16321	0.797943	0.578271
EMSC-20130516_0000002	TR	36.9935	28.4128	FOCM	38.7131	26.7309			NF	16.6167	5	241.582	553.331	7	-0.0426	-0.00284	-0.0001	1e-05	-0.579994	-1.28911	-0.205331	-0.056631	-0.654325
EMSC-20130516_0000002	TR	36.9935	28.4128	GOMA	38.7077	27.9175			NF	16.6167	5	195.507	636.467	132	0.07518	0.04702	-7e-05	-4e-05	-0.201339	-1.11864	0.155836	0.262662	-0.730802
EMSC-20130516_0000002	TR	36.9935	28.4128	KEMT	36.6037	30.5559			NF	16.6167	5	195.675	453.978	14	0.03202	0.01149	-5e-05	-3e-05	0.237234	-0.890361	0.720572	0.0269897	-0.472828
EMSC-20130516_0000002	TR	36.9935	28.4128	KHL	38.3232	29.5286			NF	16.6167	5	177.505	448.27	952	0.03568	0.02216	4e-05	2e-05	-0.221805	-1.0477	0.109062	0.0108443	-0.2592
EMSC-20130516_0000002	TR	36.9935	28.4128	KRBN	38.5936	26.5537			NF	16.6167	5	241.529	843.228	94	0.08041	0.05121	1e-05	8e-05	-0.185877	-0.950008	0.116937	0.243525	-0.456307
EMSC-20130516_0000002	TR	36.9935	28.4128	MRSB	36.7161	28.1969			NF	16.6167	5	36.3379	732.254	433	0.02065	0.05366	0.00022	-0.00037	1.37256	0.0580605	1.83017	0.937802	0.294142
EMSC-20130516_0000002	TR	36.9935	28.4128	SHAP	39.0231	29.222			NF	16.6167	5	236.552	495.541	1009	-0.00572	-0.03743	-0.00018	0	-0.285349	-1.06749	-0.0182145	-0.03764	-0.438082
EMSC-20130516_0000002	TR	36.9935	28.4128	SMAA	39.1005	28.9805			NF	16.6167	5	239.502	274.72	799	-0.00364	0.00311	0	0	0.216543	-0.466455	0.281833	0.701329	0.129943
EMSC-20130523_0000048	GR	38.6528	20.6111	DLFA	38.4784	22.4956			TF	11.4797	4.73	164.987	900	511	-0.01822	-0.37187	0.00018	-0.00012	-0.741516	-1.60754	-0.464871	-0.335958	-1.17795
EMSC-20130523_0000048	GR	38.6528	20.6111	ITM	37.1787	21.9252			TF	11.4797	4.73	200.383	844.349	512	-0.01976	-0.08096	0.00025	3e-05	-1.04468	-1.78519	-0.753498	-0.641286	-1.18248
EMSC-20130523_0000048	GR	38.6528	20.6111	JAN	39.6562	20.8487			TF	11.4797	4.73	113.434	435.911	515	0.01206	-0.02499	3e-05	1e-05	-0.400807	-1.48364	-0.0400876	-0.395232	-1.12634
EMSC-20130523_0000048	GR	38.6528	20.6111	KASA	39.7463	19.9354			TF	11.4797	4.73	134.81	900	41	0.09573	-0.04553	-0.00012	1e-05	-0.418175	-1.51905	0.0470369	-0.534945	-1.11041
EMSC-20130523_0000048	GR	38.6528	20.6111	MGNA	38.6561	20.7912			TF	11.4797	4.73	15.6397	411.497	65	0.03929	0.00081	-1e-05	8e-05	1.06214	-0.241714	1.41131	0.715166	-0.0356922
EMSC-20130604_0000003	GR	37.9613	23.9675	ALNA	39.148	23.8667			NF	14.3984	4	132.25	604.69	8	0.03835	-0.03635	-5e-05	-6e-05	-0.652223	-1.89279	-0.265473	-0.80242	-1.97862
EMSC-20130604_0000003	GR	37.9613	23.9675	AMGA	36.8316	25.8938			NF	14.3984	4	211.505	625.424	282	-0.01177	-0.0446	0.00022	3e-05	-1.19339	-2.47944	-0.782236	-1.61294	-2.66322
EMSC-20130604_0000003	GR	37.9613	23.9675	DION	38.0779	23.9331			NF	14.3984	4	13.316	688.95	411	0.01094	0.09892	-3e-05	-0.00012	1.0649	-0.281078	1.453	0.379851	-0.57468
EMSC-20130604_0000003	GR	37.9613	23.9675	DLFA	38.4784	22.4956			NF	14.3984	4	140.849	900	511	-0.01822	-0.37187	0.00018	-0.00012	-0.864168	-2.20964	-0.491961	-1.27824	-2.39277
EMSC-20130604_0000003	GR	37.9613	23.9675	ITM	37.1787	21.9252			NF	14.3984	4	199.919	844.349	512	-0.01976	-0.08096	0.00025	3e-05	-1.47248	-2.65398	-1.04499	-1.62612	-2.53269
EMSC-20130604_0000003	GR	37.9613	23.9675	MNVA	36.6871	23.0373			NF	14.3984	4	163.826	883.644	11	0.09264	0.03325	-0.00021	-4e-05	-0.963516	-2.1285	-0.52644	-0.819337	-2.20068
EMSC-20130604_0000003	GR	37.9613	23.9675	NOAC	37.9738	23.7177			NF	14.3984	4	21.9448	434.005	96	-0.02322	0.00027	5e-05	6e-05	0.950647	-0.471535	1.22652	0.0692409	-0.909192
EMSC-20130604_0000003	GR	37.9613	23.9675	PSRA	38.5398	25.562			NF	14.3984	4	153.375	600	11	-0.00241	-0.0154	5e-05	-2e-05	-0.708703	-2.03924	-0.249893	-1.23447	-2.26276
EMSC-20130604_0000003	GR	37.9613	23.9675	TNSA	37.5394	25.1631			NF	14.3984	4	115.109	498.109	10	-0.00543	-0.03838	0	-6e-05	-0.448413	-2.01893	-0.187231	-1.3104	-2.31337
EMSC-20130604_0000003	GR	37.9613	23.9675	YDRA	37.3495	23.4653			NF	14.3984	4	81.1355	693.523	86	-0.04435	0.15921	8e-05	-0.0002	0.552795	-0.82656	1.14331	-0.214229	-1.25332
EMSC-20130618_0000061	GR	36.9015	22.1028	ITM	37.1787	21.9252			NF	15.6342	4.26	34.6213	844.349	512	-0.01976	-0.08096	0.00025	3e-05	0.418156	-1.19797	0.470484	-0.475967	-1.61438
EMSC-20130618_0000061	GR	36.9015	22.1028	MNVA	36.6871	23.0373			NF	15.6342	4.26	86.5626	883.644	11	0.09264	0.03325	-0.00021	-4e-05	-0.975057	-2.13241	-0.32973	-1.03584	-2.07897
EMSC-20130618_0000061	GR	36.9015	22.1028	NOAC	37.9738	23.7177			NF	15.6342	4.26	185.86	434.005	96	-0.02322	0.00027	5e-05	6e-05	-1.38026	-2.4018	-0.926668	-1.27741	-2.12376
EMSC-20130618_0000061	GR	36.9015	22.1028	YDRA	37.3495	23.4653			NF	15.6342	4.26	130.661	693.523	86	-0.04435	0.15921	8e-05	-0.0002	-0.843569	-1.95766	-0.45525	-0.876122	-1.86124
EMSC-20130702_0000043	GR	40.124	21.85	ALNA	39.148	23.8667			NF	22.2	4.8	203.953	604.69	8	0.03835	-0.03635	-5e-05	-6e-05	-0.685135	-1.62612	-0.232345	-0.29886	-1.37044
EMSC-20130702_0000043	GR	40.124	21.85	DLFA	38.4784	22.4956			NF	22.2	4.8	191.23	900	511	-0.01822	-0.37187	0.00018	-0.00012	-0.876386	-1.88553	-0.613592	-0.635638	-1.31275
EMSC-20130702_0000043	GR	40.124	21.85	JAN	39.6562	20.8487			NF	22.2	4.8	100.017	435.911	515	0.01206	-0.02499	3e-05	1e-05	-0.493546	-1.75581	-0.0937388	-0.70504	-1.46941
EMSC-20130702_0000043	GR	40.124	21.85	KASA	39.7463	19.9354			NF	22.2	4.8	168.552	900	41	0.09573	-0.04553	-0.00012	1e-05	-0.815591	-1.82432	-0.346035	-0.789206	-1.3603
EMSC-20130702_0000043	GR	40.124	21.85	MGNA	38.6561	20.7912			NF	22.2	4.8	186.873	411.497	65	0.03929	0.00081	-1e-05	8e-05	-1.04311	-2.12392	-0.656482	-1.13514	-1.49046
EMSC-20130703_0000045	GR	40.1045	21.8529	ALNA	39.148	23.8667			NF	15.6943	4.1	202.617	604.69	8	0.03835	-0.03635	-5e-05	-6e-05	-1.63428	-2.46116	-1.27026	-1.25874	-2.24534
EMSC-20130703_0000045	GR	40.1045	21.8529	DLFA	38.4784	22.4956			NF	15.6943	4.1	189.085	900	511	-0.01822	-0.37187	0.00018	-0.00012	-1.37074	-2.52059	-1.08873	-1.30586	-2.21445
EMSC-20130703_0000045	GR	40.1045	21.8529	JAN	39.6562	20.8487			NF	15.6943	4.1	99.1309	435.911	515	0.01206	-0.02499	3e-05	1e-05	-0.729822	-2.26637	-0.47105	-1.21602	-2.38285
EMSC-20130703_0000045	GR	40.1045	21.8529	KASA	39.7463	19.9354			NF	15.6943	4.1	168.288	900	41	0.09573	-0.04553	-0.00012	1e-05	-1.16564	-2.27857	-0.687718	-1.36574	-2.15745
EMSC-20130703_0000045	GR	40.1045	21.8529	MGNA	38.6561	20.7912			NF	15.6943	4.1	185.111	411.497	65	0.03929	0.00081	-1e-05	8e-05	-1.4524	-2.71095	-1.14832	-1.56954	-2.46269
EMSC-20130703_0000047	GR	40.147	21.826	TIR1	41.3357	19.8078	311	MASW	NF	18.5	4.8	215.352	311	96	-0.01093	0.00203	0	0	-0.566891	-1.30684	-0.334092	-0.126333	-0.935266
EMSC-20130703_0000047	GR	40.147	21.826	ALNA	39.148	23.8667			NF	18.5	4.8	207.032	604.69	8	0.03835	-0.03635	-5e-05	-6e-05	-0.753224	-1.60107	-0.494891	-0.294021	-1.21676
EMSC-20130703_0000047	GR	40.147	21.826	DLFA	38.4784	22.4956			NF	18.5	4.8	194.278	900	511	-0.01822	-0.37187	0.00018	-0.00012	-1.01303	-1.70745	-0.63038	-0.673023	-1.07127
EMSC-20130703_0000047	GR	40.147	21.826	JAN	39.6562	20.8487			NF	18.5	4.8	99.6397	435.911	515	0.01206	-0.02499	3e-05	1e-05	-0.540343	-1.6722	-0.0448139	-0.687644	-1.27138
EMSC-20130703_0000047	GR	40.147	21.826	KASA	39.7463	19.9354			NF	18.5	4.8	167.208	900	41	0.09573	-0.04553	-0.00012	1e-05	-0.887173	-1.81955	-0.372547	-0.740977	-1.23574
EMSC-20130703_0000047	GR	40.147	21.826	MGNA	38.6561	20.7912			NF	18.5	4.8	188.12	411.497	65	0.03929	0.00081	-1e-05	8e-05	-1.12037	-1.97152	-0.759431	-1.04939	-1.39628
EMSC-20130726_0000002	TR	35.9586	35.7887	KRTD	36.5934	35.4157			U	14.9261	4.3	78.1053	362.858	24	-0.00117	-0.00581	1e-05	2e-05	-0.00352605	-1.37226	0.365659	-0.316376	-1.01096
EMSC-20130726_0000002	TR	35.9586	35.7887	SLFK	36.3926	33.9465			U	14.9261	4.3	172.247	469.727	38	-0.02307	-0.0657	-1e-05	-9e-05	-0.0840868	-1.6699	-0.0693729	-0.646564	-1.79185
EMSC-20130728_0000053	TR	41.0553	34.3331	SAFT	41.2398	32.6872			SS	6.6604	4.47	139.33	461.068	415	0.00751	-0.04052	-9e-05	-1e-05	-0.331497	-1.47662	0.0122544	-0.572368	-1.10303
EMSC-20130730_0000029	TR	40.3122	25.8299	ALNA	39.148	23.8667			NF	4.6343	5.03	211.987	604.69	8	0.03835	-0.03635	-5e-05	-6e-05	-1.03164	-1.87669	-0.678007	-0.603926	-1.60406
EMSC-20130730_0000029	TR	40.3122	25.8299	EFSA	39.5401	24.9886			NF	4.6343	5.03	111.874	477.937	20	-0.02705	0.04364	-2e-05	-7e-05	-0.194103	-1.25308	0.217664	-0.354742	-1.03132
EMSC-20130730_0000029	TR	40.3122	25.8299	KVLA	40.937	24.3859			NF	4.6343	5.03	140.279	748.058	74	0.06768	-0.09968	-0.0001	-0.00014	-0.480184	-1.75837	-0.0821088	-0.696912	-1.29069
EMSC-20130730_0000029	TR	40.3122	25.8299	LIA	39.8972	25.1806			NF	4.6343	5.03	71.9645	464.17	45	0.04683	-0.0177	-3e-05	-1e-05	0.261911	-1.16877	0.399343	-0.175272	-1.2722
EMSC-20130730_0000029	TR	40.3122	25.8299	PRK	39.2456	26.265			NF	4.6343	5.03	124.286	439.853	104	-0.02311	-0.00716	4e-05	3e-05	0.412148	-0.785198	0.801996	0.186626	-0.729271
EMSC-20130730_0000029	TR	40.3122	25.8299	PSRA	38.5398	25.562			NF	4.6343	5.03	198.422	600	11	-0.00241	-0.0154	5e-05	-2e-05	-0.341506	-1.60084	0.061759	-0.662965	-1.46468
EMSC-20130730_0000029	TR	40.3122	25.8299	SMTH	40.4709	25.5304			NF	4.6343	5.03	30.8983	900	356	-0.27133	-0.01567	-0.00034	0.00014	1.05261	-0.582799	0.631041	-0.0706881	-0.571201
EMSC-20130730_0000029	TR	40.3122	25.8299	FOCM	38.7131	26.7309			NF	4.6343	5.03	193.881	553.331	7	-0.0426	-0.00284	-0.0001	1e-05	0.579	-0.583352	1.09665	0.316087	-0.302347
EMSC-20130730_0000029	TR	40.3122	25.8299	GONE	40.0466	27.686			NF	4.6343	5.03	160.425	440.139	144	-0.03639	0.04445	-0.00014	-2e-05	1.04605	-0.0737915	1.45544	1.09948	-0.0981177
EMSC-20130730_0000029	TR	40.3122	25.8299	GPNR	39.4552	26.1329			NF	4.6343	5.03	98.7387	664.563	14	-0.00819	-0.06363	-1e-05	-0.0001	0.938325	-0.252623	1.34454	0.597118	-0.336665
EMSC-20130730_0000029	TR	40.3122	25.8299	KRBN	38.5936	26.5537			NF	4.6343	5.03	200.948	843.228	94	0.08041	0.05121	1e-05	8e-05	0.505705	-0.603987	1.04329	0.311081	-0.401467
EMSC-20130730_0000029	TR	40.3122	25.8299	TKR	40.9902	27.5357			NF	4.6343	5.03	162.453	448.765	131	0.0082	-0.04592	0.0001	9e-05	0.965376	-0.304406	1.49461	0.754101	-0.260686
EMSC-20130807_0000017	TR	39.2125	29.4036	AKS	38.8785	27.8129			NF	12.645	4.27	142.301	541.408	331	0.04978	0.04567	0.00012	0.00025	-0.109418	-1.42011	0.19681	-0.398568	-1.23228
EMSC-20130807_0000017	TR	39.2125	29.4036	DENT	37.7539	29.0331			NF	12.645	4.27	165.364	900	656	0.06213	0.12068	2e-05	-6e-05	-0.612029	-1.7016	-0.162436	-0.571514	-1.64146
EMSC-20130807_0000017	TR	39.2125	29.4036	ESKT	39.5212	30.8492			NF	12.645	4.27	128.923	649.232	1204	-0.07431	0.07917	0.0004	0.00011	0.604097	-0.801969	0.865204	-0.274785	-1.08927
EMSC-20130807_0000017	TR	39.2125	29.4036	GOMA	38.7077	27.9175			NF	12.645	4.27	140.216	636.467	132	0.07518	0.04702	-7e-05	-4e-05	-0.0242107	-1.18456	0.411854	-0.307607	-1.28668
EMSC-20130807_0000017	TR	39.2125	29.4036	GONE	40.0466	27.686			NF	12.645	4.27	173.89	440.139	144	-0.03639	0.04445	-0.00014	-2e-05	-0.0960831	-1.23544	0.208521	-0.081317	-1.22484
EMSC-20130807_0000017	TR	39.2125	29.4036	IZI	40.3368	29.4728			NF	12.645	4.27	125.156	838.565	836	-0.02542	-0.07619	0.00022	0.00011	0.184466	-1.07275	0.737134	-0.0572427	-1.03539
EMSC-20130807_0000017	TR	39.2125	29.4036	ORLT	40.0452	28.8914			NF	12.645	4.27	102.457	610.21	717	0.06117	-0.07403	0.00015	1e-05	0.708706	-0.453037	1.13287	0.509695	-0.647229
EMSC-20130807_0000017	TR	39.2125	29.4036	SHAP	39.0231	29.222			NF	12.645	4.27	26.2485	495.541	1009	-0.00572	-0.03743	-0.00018	0	1.73117	0.10134	1.79881	0.82532	-0.245874
EMSC-20130807_0000017	TR	39.2125	29.4036	SMAA	39.1005	28.9805			NF	12.645	4.27	38.5482	274.72	799	-0.00364	0.00311	0	0	1.44274	0.0859874	1.62796	1.37931	-0.0520044
EMSC-20130807_0000037	GR	38.6995	22.6719	ALNA	39.148	23.8667			U	12.1583	4.3	114.762	604.69	8	0.03835	-0.03635	-5e-05	-6e-05	-0.87709	-1.98978	-0.452655	-0.751675	-1.89256
EMSC-20130807_0000037	GR	38.6995	22.6719	DLFA	38.4784	22.4956			U	12.1583	4.3	28.9699	900	511	-0.01822	-0.37187	0.00018	-0.00012	0.625943	-0.70339	0.90548	0.197814	-0.877346
EMSC-20130807_0000037	GR	38.6995	22.6719	EFSA	39.5401	24.9886			U	12.1583	4.3	220.631	477.937	20	-0.02705	0.04364	-2e-05	-7e-05	-1.79316	-2.63094	-1.39831	-1.46866	-2.14088
EMSC-20130807_0000037	GR	38.6995	22.6719	ITM	37.1787	21.9252			U	12.1583	4.3	181.336	844.349	512	-0.01976	-0.08096	0.00025	3e-05	-1.44293	-2.35609	-1.0133	-1.19069	-1.80107
EMSC-20130807_0000037	GR	38.6995	22.6719	JAN	39.6562	20.8487			U	12.1583	4.3	189.762	435.911	515	0.01206	-0.02499	3e-05	1e-05	-1.29609	-2.4354	-1.00537	-1.25452	-1.98643
EMSC-20130807_0000037	GR	38.6995	22.6719	MGNA	38.6561	20.7912			U	12.1583	4.3	163.33	411.497	65	0.03929	0.00081	-1e-05	8e-05	-1.51264	-2.40095	-1.16097	-1.17839	-1.95614
EMSC-20130807_0000037	GR	38.6995	22.6719	NOAC	37.9738	23.7177			U	12.1583	4.3	121.778	434.005	96	-0.02322	0.00027	5e-05	6e-05	-0.357009	-1.58961	0.246566	-0.335844	-1.43054
EMSC-20130807_0000037	GR	38.6995	22.6719	YDRA	37.3495	23.4653			U	12.1583	4.3	165.421	693.523	86	-0.04435	0.15921	8e-05	-0.0002	-1.00387	-2.19497	-0.590447	-0.901089	-1.99921
EMSC-20130807_0000038	GR	38.71	22.67	KTHA	36.2566	23.0621			U	16	5.4	274.99	516.09	273	0.05157	-0.0442	0.00023	0.00014	-0.739537	-1.55836	-0.348292	-0.464468	-1.13858
EMSC-20130807_0000038	GR	38.71	22.67	ALNA	39.148	23.8667			U	16	5.4	114.401	604.69	8	0.03835	-0.03635	-5e-05	-6e-05	0.212295	-0.833109	0.546674	0.292363	-0.837113
EMSC-20130807_0000038	GR	38.71	22.67	DLFA	38.4784	22.4956			U	16	5.4	29.8825	900	511	-0.01822	-0.37187	0.00018	-0.00012	1.52078	0.327185	1.87453	1.14537	0.231188
EMSC-20130807_0000038	GR	38.71	22.67	EFSA	39.5401	24.9886			U	16	5.4	220.274	477.937	20	-0.02705	0.04364	-2e-05	-7e-05	-0.737165	-1.50666	-0.375551	-0.287444	-1.14119
EMSC-20130807_0000038	GR	38.71	22.67	ITM	37.1787	21.9252			U	16	5.4	182.364	844.349	512	-0.01976	-0.08096	0.00025	3e-05	-0.587729	-1.16629	-0.247276	-0.218829	-0.666326
EMSC-20130807_0000038	GR	38.71	22.67	JAN	39.6562	20.8487			U	16	5.4	188.965	435.911	515	0.01206	-0.02499	3e-05	1e-05	-0.277616	-1.16217	0.104389	-0.104561	-0.749227
EMSC-20130807_0000038	GR	38.71	22.67	KTHA	36.2566	23.0621			U	16	5.4	274.99	516.09	273	0.05157	-0.0442	0.00023	0.00014	-0.748515	-1.5528	-0.357181	-0.473284	-1.14576
EMSC-20130807_0000038	GR	38.71	22.67	MGNA	38.6561	20.7912			U	16	5.4	163.192	411.497	65	0.03929	0.00081	-1e-05	8e-05	-0.329637	-1.13875	0.0887702	-0.179784	-0.673482
EMSC-20130807_0000038	GR	38.71	22.67	MNVA	36.6871	23.0373			U	16	5.4	227.247	883.644	11	0.09264	0.03325	-0.00021	-4e-05	-0.996418	-1.54467	-0.55531	-0.515379	-1.09024
EMSC-20130807_0000038	GR	38.71	22.67	NOAC	37.9738	23.7177			U	16	5.4	122.673	434.005	96	-0.02322	0.00027	5e-05	6e-05	0.560883	-0.603742	1.12605	0.631002	-0.483451
EMSC-20130807_0000038	GR	38.71	22.67	PRK	39.2456	26.265			U	16	5.4	316.391	439.853	104	-0.02311	-0.00716	4e-05	3e-05	-1.11577	-1.90621	-0.838781	-0.515337	-1.57011
EMSC-20130807_0000038	GR	38.71	22.67	PSRA	38.5398	25.562			U	16	5.4	251.934	600	11	-0.00241	-0.0154	5e-05	-2e-05	-0.847929	-1.73306	-0.491151	-0.702719	-1.30683
EMSC-20130807_0000038	GR	38.71	22.67	TNSA	37.5394	25.1631			U	16	5.4	253.956	498.109	10	-0.00543	-0.03838	0	-6e-05	-0.610482	-1.53447	-0.128155	-0.343992	-1.02624
EMSC-20130807_0000038	GR	38.71	22.67	YDRA	37.3495	23.4653			U	16	5.4	166.548	693.523	86	-0.04435	0.15921	8e-05	-0.0002	-0.247561	-1.10066	0.202241	0.0644824	-0.868464
EMSC-20130807_0000038	GR	38.71	22.67	GPNR	39.4552	26.1329			U	16	5.4	310.146	664.563	14	-0.00819	-0.06363	-1e-05	-0.0001	-0.542625	-1.34163	-0.248199	-0.151635	-0.716096
EMSC-20130807_0000063	GR	38.6882	22.6605	TRIZ	38.3654	22.0727			NF	0.1	4.67	62.4696	600	16	-0.00292	-0.015	3e-05	0	0.461238	-0.727627	0.938469	0.249829	-0.766787
EMSC-20130807_0000063	GR	38.6882	22.6605	ALNA	39.148	23.8667			NF	0.1	4.67	116.205	604.69	8	0.03835	-0.03635	-5e-05	-6e-05	-0.715176	-1.63423	-0.361732	-0.333556	-1.43839
EMSC-20130807_0000063	GR	38.6882	22.6605	DLFA	38.4784	22.4956			NF	0.1	4.67	27.3807	900	511	-0.01822	-0.37187	0.00018	-0.00012	1.02006	-0.325972	1.24177	0.59871	-0.34721
EMSC-20130807_0000063	GR	38.6882	22.6605	EFSA	39.5401	24.9886			NF	0.1	4.67	222.069	477.937	20	-0.02705	0.04364	-2e-05	-7e-05	-1.43731	-2.17154	-1.23684	-1.0709	-1.54566
EMSC-20130807_0000063	GR	38.6882	22.6605	ITM	37.1787	21.9252			NF	0.1	4.67	179.806	844.349	512	-0.01976	-0.08096	0.00025	3e-05	-1.03229	-1.80343	-0.66305	-0.668329	-1.23975
EMSC-20130807_0000063	GR	38.6882	22.6605	JAN	39.6562	20.8487			NF	0.1	4.67	189.67	435.911	515	0.01206	-0.02499	3e-05	1e-05	-0.916795	-1.80363	-0.461494	-0.652015	-1.45412
EMSC-20130807_0000063	GR	38.6882	22.6605	MGNA	38.6561	20.7912			NF	0.1	4.67	162.321	411.497	65	0.03929	0.00081	-1e-05	8e-05	-0.950511	-1.77256	-0.60614	-0.607535	-1.33521
EMSC-20130807_0000063	GR	38.6882	22.6605	NOAC	37.9738	23.7177			NF	0.1	4.67	121.706	434.005	96	-0.02322	0.00027	5e-05	6e-05	-0.102779	-1.24009	0.319918	-0.13264	-0.934551
EMSC-20130807_0000063	GR	38.6882	22.6605	YDRA	37.3495	23.4653			NF	0.1	4.67	164.708	693.523	86	-0.04435	0.15921	8e-05	-0.0002	-0.8667	-1.84607	-0.423998	-0.434731	-1.52533
EMSC-20130809_0000034	GR	38.7017	22.6914	ALNA	39.148	23.8667			NF	13.2122	4.8	113.136	604.69	8	0.03835	-0.03635	-5e-05	-6e-05	-0.450757	-1.59273	-0.0906655	-0.439936	-1.24704
EMSC-20130809_0000034	GR	38.7017	22.6914	DLFA	38.4784	22.4956			NF	13.2122	4.8	30.1022	900	511	-0.01822	-0.37187	0.00018	-0.00012	1.05141	-0.14975	1.27872	0.865034	-0.156533
EMSC-20130809_0000034	GR	38.7017	22.6914	EFSA	39.5401	24.9886			NF	13.2122	4.8	219.001	477.937	20	-0.02705	0.04364	-2e-05	-7e-05	-1.34659	-2.09735	-1.02955	-1.07486	-1.39819
EMSC-20130809_0000034	GR	38.7017	22.6914	ITM	37.1787	21.9252			NF	13.2122	4.8	182.187	844.349	512	-0.01976	-0.08096	0.00025	3e-05	-0.952184	-1.62487	-0.610803	-0.459758	-1.0565
EMSC-20130809_0000034	GR	38.7017	22.6914	JAN	39.6562	20.8487			NF	13.2122	4.8	191.018	435.911	515	0.01206	-0.02499	3e-05	1e-05	-0.792701	-1.69913	-0.394343	-0.620548	-1.1993
EMSC-20130809_0000034	GR	38.7017	22.6914	MGNA	38.6561	20.7912			NF	13.2122	4.8	165.026	411.497	65	0.03929	0.00081	-1e-05	8e-05	-0.779138	-1.62308	-0.390689	-0.432016	-1.05935
EMSC-20130809_0000034	GR	38.7017	22.6914	NOAC	37.9738	23.7177			NF	13.2122	4.8	120.672	434.005	96	-0.02322	0.00027	5e-05	6e-05	-0.0111578	-1.17029	0.535201	-0.15787	-0.817016
EMSC-20130809_0000034	GR	38.7017	22.6914	YDRA	37.3495	23.4653			NF	13.2122	4.8	164.933	693.523	86	-0.04435	0.15921	8e-05	-0.0002	-0.731418	-1.67744	-0.287418	-0.48927	-1.24919
EMSC-20130809_0000039	GR	38.6852	22.659	ALNA	39.148	23.8667			NF	15.6426	4.92	116.471	604.69	8	0.03835	-0.03635	-5e-05	-6e-05	-0.478638	-1.50064	-0.122169	-0.237623	-1.45391
EMSC-20130809_0000039	GR	38.6852	22.659	DLFA	38.4784	22.4956			NF	15.6426	4.92	27.0284	900	511	-0.01822	-0.37187	0.00018	-0.00012	1.18024	-0.0572207	1.37708	0.742324	-0.255551
EMSC-20130809_0000039	GR	38.6852	22.659	EFSA	39.5401	24.9886			NF	15.6426	4.92	222.333	477.937	20	-0.02705	0.04364	-2e-05	-7e-05	-1.32021	-2.11969	-0.99478	-0.928947	-1.71589
EMSC-20130809_0000039	GR	38.6852	22.659	ITM	37.1787	21.9252			NF	15.6426	4.92	179.448	844.349	512	-0.01976	-0.08096	0.00025	3e-05	-1.07365	-1.83197	-0.62508	-0.689219	-1.26404
EMSC-20130809_0000039	GR	38.6852	22.659	JAN	39.6562	20.8487			NF	15.6426	4.92	189.756	435.911	515	0.01206	-0.02499	3e-05	1e-05	-0.668361	-1.74423	-0.276816	-0.520982	-1.34793
EMSC-20130809_0000039	GR	38.6852	22.659	MGNA	38.6561	20.7912			NF	15.6426	4.92	162.187	411.497	65	0.03929	0.00081	-1e-05	8e-05	-0.693847	-1.73874	-0.375596	-0.597731	-1.32696
EMSC-20130809_0000039	GR	38.6852	22.659	NOAC	37.9738	23.7177			NF	15.6426	4.92	121.589	434.005	96	-0.02322	0.00027	5e-05	6e-05	-0.0997804	-1.28351	0.320276	-0.286593	-1.11741
EMSC-20130809_0000039	GR	38.6852	22.659	YDRA	37.3495	23.4653			NF	15.6426	4.92	164.464	693.523	86	-0.04435	0.15921	8e-05	-0.0002	-0.768247	-1.82844	-0.375589	-0.54083	-1.56992
EMSC-20130815_0000084	IT	38.099	14.919	CELI	39.4027	16.5088			TF	18.52	4.4	200.046	494.642	1243.76	-0.0776	0.12593	0.00083	0.00178	-1.52679	-2.52104	-1.23857	-1.23009	-2.12866
EMSC-20130815_0000084	IT	38.099	14.919	ECHR	37.6863	14.9129			TF	18.52	4.4	45.8933	421.45	1115.37	-0.10069	-0.07386	-0.0018	-0.00138	0.630591	-0.381803	0.981863	0.737532	-0.0286713
EMSC-20130815_0000084	IT	38.099	14.919	ILLI	38.4457	14.9483			TF	18.52	4.4	38.636	402.117	219.117	-0.04865	-0.0134	0.00507	0.01347	0.971	-0.273974	1.37925	0.88473	-0.358168
EMSC-20130815_0000084	IT	38.099	14.919	JOPP	38.6068	15.8856			TF	18.52	4.4	101.451	488.391	504.213	0.12262	-0.20414	0.0001	0.00077	-0.541127	-2.03694	-0.529155	-1.12545	-1.62331
EMSC-20130815_0000084	IT	38.099	14.919	PLAC	38.4494	16.4383			TF	18.52	4.4	138.229	404.99	529.022	0.08808	0.12285	0.00468	0.00079	-1.16309	-2.15179	-0.775854	-1.01828	-1.72949
EMSC-20130815_0000084	IT	38.099	14.919	CUC	39.9938	15.8155			TF	18.52	4.4	224.462	698.631	610.928	-0.41867	-0.12326	0.00455	-0.00275	-1.48649	-2.79124	-1.09988	-1.55932	-2.67107
EMSC-20130815_0000084	IT	38.099	14.919	TIP	39.1794	16.7583			TF	18.52	4.4	199.873	533.388	776.877	0.22392	0.14522	-0.00153	-0.00412	-1.81383	-2.63829	-1.54208	-1.42248	-2.27597
EMSC-20130829_0000020	TR	40.347	27.4571	LIA	39.8972	25.1806			SS	17.3508	4.13	199.919	464.17	45	0.04683	-0.0177	-3e-05	-1e-05	-0.840361	-2.12679	-0.380661	-1.1123	-2.18328
EMSC-20130829_0000020	TR	40.347	27.4571	PRK	39.2456	26.265			SS	17.3508	4.13	159.277	439.853	104	-0.02311	-0.00716	4e-05	3e-05	-0.577543	-1.94392	-0.352954	-0.971699	-2.00784
EMSC-20130829_0000020	TR	40.347	27.4571	SMTH	40.4709	25.5304			SS	17.3508	4.13	163.703	900	356	-0.27133	-0.01567	-0.00034	0.00014	-0.560895	-2.11345	-0.579675	-1.36968	-2.33344
EMSC-20130829_0000020	TR	40.347	27.4571	GONE	40.0466	27.686			SS	17.3508	4.13	38.6487	440.139	144	-0.03639	0.04445	-0.00014	-2e-05	0.480555	-0.820541	0.748361	0.14308	-0.825813
EMSC-20130829_0000020	TR	40.347	27.4571	GPNR	39.4552	26.1329			SS	17.3508	4.13	150.307	664.563	14	-0.00819	-0.06363	-1e-05	-0.0001	0.401656	-1.10577	0.696404	-0.209562	-1.24728
EMSC-20130829_0000020	TR	40.347	27.4571	KRBN	38.5936	26.5537			SS	17.3508	4.13	209.821	843.228	94	0.08041	0.05121	1e-05	8e-05	-0.420201	-1.82324	-0.0149993	-0.793737	-1.67596
EMSC-20130829_0000020	TR	40.347	27.4571	ORLT	40.0452	28.8914			SS	17.3508	4.13	126.358	610.21	717	0.06117	-0.07403	0.00015	1e-05	0.236678	-1.20792	0.546237	-0.431129	-1.4963
EMSC-20130829_0000020	TR	40.347	27.4571	SHAP	39.0231	29.222			SS	17.3508	4.13	210.893	495.541	1009	-0.00572	-0.03743	-0.00018	0	-0.0428323	-1.44954	0.168319	-0.483778	-1.6954
EMSC-20130829_0000020	TR	40.347	27.4571	SMAA	39.1005	28.9805			SS	17.3508	4.13	190.219	274.72	799	-0.00364	0.00311	0	0	0.025453	-1.1026	0.571226	0.160902	-1.0183
EMSC-20130908_0000021	GR	34.79	25.03	IMMV	35.4599	23.9802			SS	5	4.92	121.094	795.072	188	-0.02677	0.13844	6e-05	-0.00015	-0.165522	-1.33278	0.349023	0.0104895	-1.09979
EMSC-20130908_0000021	GR	34.79	25.03	KARP	35.5472	27.1612			SS	5	4.92	211.22	883.296	416	0.15252	-0.10626	5e-05	0.0001	-1.01213	-1.91771	-0.635827	-0.598365	-1.59184
EMSC-20130908_0000021	GR	34.79	25.03	ANKY	35.867	23.3012			SS	5	4.92	197.327	619.572	100	-0.0098	0.05556	-0.00012	-3e-05	-0.857003	-1.69022	-0.388706	-0.434783	-1.41916
EMSC-20130908_0000021	GR	34.79	25.03	GVD	34.8391	24.0874			SS	5	4.92	86.2262	669.155	186	0.07511	0.04868	-4e-05	1e-05	0.284731	-0.909819	0.784737	-0.10714	-0.970384
EMSC-20130908_0000021	GR	34.79	25.03	IACM	35.3058	25.0709			SS	5	4.92	57.4751	395.328	66	-0.00016	0.02528	-0.00012	-1e-05	1.13002	0.0433281	1.62088	1.0433	-0.109499
EMSC-20130908_0000021	GR	34.79	25.03	IMMV	35.4599	23.9802			SS	5	4.92	121.094	795.072	188	-0.02677	0.13844	6e-05	-0.00015	-0.165609	-1.33497	0.348972	0.0104803	-1.1032
EMSC-20130908_0000021	GR	34.79	25.03	KARP	35.5471	27.1611			SS	5	4.92	211.204	883.296	416	0.15252	-0.10626	5e-05	0.0001	-1.01413	-1.92653	-0.64461	-0.607296	-1.60097
EMSC-20130908_0000021	GR	34.79	25.03	ZKR	35.1147	26.217			SS	5	4.92	114.046	745.462	201	0.10514	-0.01014	-0.00019	-4e-05	-0.473439	-1.56915	0.118752	-0.424092	-1.15544
EMSC-20130909_0000059	GR	38.0024	20.7433	TRIZ	38.3654	22.0727			SS	15.2242	4.64	123.006	600	16	-0.00292	-0.015	3e-05	0	-0.514629	-1.75253	-0.0507641	-0.803931	-1.52879
EMSC-20130909_0000059	GR	38.0024	20.7433	DLFA	38.4784	22.4956			SS	15.2242	4.64	161.93	900	511	-0.01822	-0.37187	0.00018	-0.00012	-1.21262	-2.2261	-0.808503	-1.06343	-1.81521
EMSC-20130909_0000059	GR	38.0024	20.7433	ITM	37.1787	21.9252			SS	15.2242	4.64	138.682	844.349	512	-0.01976	-0.08096	0.00025	3e-05	-0.735971	-1.83763	-0.24182	-0.720646	-1.43713
EMSC-20130909_0000059	GR	38.0024	20.7433	JAN	39.6562	20.8487			SS	15.2242	4.64	184.116	435.911	515	0.01206	-0.02499	3e-05	1e-05	-0.9103	-1.98818	-0.511879	-0.957232	-1.60396
EMSC-20130909_0000059	GR	38.0024	20.7433	KASA	39.7463	19.9354			SS	15.2242	4.64	206.134	900	41	0.09573	-0.04553	-0.00012	1e-05	-0.932981	-2.18396	-0.479269	-1.06552	-1.80868
EMSC-20130909_0000059	GR	38.0024	20.7433	MGNA	38.6561	20.7912			SS	15.2242	4.64	72.8035	411.497	65	0.03929	0.00081	-1e-05	8e-05	0.393559	-1.31364	0.201911	-0.52301	-1.48129
EMSC-20130916_0000061	GR	38.723	22.739	TRIZ	38.3654	22.0727			NF	18	4.79	70.2743	600	16	-0.00292	-0.015	3e-05	0	0.738265	-0.520743	1.22761	0.35252	-0.755687
EMSC-20130916_0000061	GR	38.723	22.739	ALNA	39.148	23.8667			NF	18	4.79	108.384	604.69	8	0.03835	-0.03635	-5e-05	-6e-05	-0.755218	-1.68597	-0.237687	-0.478431	-1.51596
EMSC-20130916_0000061	GR	38.723	22.739	DLFA	38.4784	22.4956			NF	18	4.79	34.4549	900	511	-0.01822	-0.37187	0.00018	-0.00012	1.04794	-0.36902	1.35794	0.507516	-0.507815
EMSC-20130916_0000061	GR	38.723	22.739	EFSA	39.5401	24.9886			NF	18	4.79	214.252	477.937	20	-0.02705	0.04364	-2e-05	-7e-05	-1.39035	-2.22445	-1.19653	-1.15777	-1.72597
EMSC-20130916_0000061	GR	38.723	22.739	ITM	37.1787	21.9252			NF	18	4.79	185.948	844.349	512	-0.01976	-0.08096	0.00025	3e-05	-1.09095	-1.98975	-0.715209	-0.755431	-1.49963
EMSC-20130916_0000061	GR	38.723	22.739	JAN	39.6562	20.8487			NF	18	4.79	193.14	435.911	515	0.01206	-0.02499	3e-05	1e-05	-0.830591	-1.98559	-0.399964	-0.955342	-1.68323
EMSC-20130916_0000061	GR	38.723	22.739	MGNA	38.6561	20.7912			NF	18	4.79	169.219	411.497	65	0.03929	0.00081	-1e-05	8e-05	-0.891015	-1.90854	-0.509913	-0.907376	-1.56184
EMSC-20130916_0000061	GR	38.723	22.739	NOAC	37.9738	23.7177			NF	18	4.79	119.259	434.005	96	-0.02322	0.00027	5e-05	6e-05	-0.127944	-1.29477	0.285107	-0.168332	-1.09252
EMSC-20130916_0000061	GR	38.723	22.739	YDRA	37.3495	23.4653			NF	18	4.79	165.444	693.523	86	-0.04435	0.15921	8e-05	-0.0002	-0.803793	-1.77474	-0.294285	-0.502687	-1.54445
EMSC-20130916_0000088	GR	38.735	22.743	TRIZ	38.3654	22.0727			NF	20	5.39	71.3179	600	16	-0.00292	-0.015	3e-05	0	0.601419	-0.578824	1.13256	0.41242	-0.246667
EMSC-20130916_0000088	GR	38.735	22.743	KTHA	36.2566	23.0621			NF	20	5.39	277.019	516.09	273	0.05157	-0.0442	0.00023	0.00014	-1.06718	-1.8895	-0.737825	-0.64736	-1.25817
EMSC-20130916_0000088	GR	38.735	22.743	ALNA	39.148	23.8667			NF	20	5.39	107.488	604.69	8	0.03835	-0.03635	-5e-05	-6e-05	0.156817	-0.719533	0.503462	0.502626	-0.494933
EMSC-20130916_0000088	GR	38.735	22.743	ANKY	35.867	23.3012			NF	20	5.39	322.699	619.572	100	-0.0098	0.05556	-0.00012	-3e-05	-1.35672	-2.04648	-0.933539	-0.883563	-1.39238
EMSC-20130916_0000088	GR	38.735	22.743	DLFA	38.4784	22.4956			NF	20	5.39	35.7248	900	511	-0.01822	-0.37187	0.00018	-0.00012	0.980825	-0.417804	1.24742	0.570221	-0.108259
EMSC-20130916_0000088	GR	38.735	22.743	EFSA	39.5401	24.9886			NF	20	5.39	213.361	477.937	20	-0.02705	0.04364	-2e-05	-7e-05	-0.589345	-1.40341	-0.311869	-0.262316	-0.835872
EMSC-20130916_0000088	GR	38.735	22.743	ITM	37.1787	21.9252			NF	20	5.39	187.313	844.349	512	-0.01976	-0.08096	0.00025	3e-05	-0.912692	-1.5216	-0.556251	-0.698226	-1.00844
EMSC-20130916_0000088	GR	38.735	22.743	JAN	39.6562	20.8487			NF	20	5.39	192.706	435.911	515	0.01206	-0.02499	3e-05	1e-05	-0.627807	-1.58631	-0.0133491	-0.431001	-0.899134
EMSC-20130916_0000088	GR	38.735	22.743	KASA	39.7463	19.9354			NF	20	5.39	266.641	900	41	0.09573	-0.04553	-0.00012	1e-05	-1.12875	-2.01761	-0.635664	-1.05566	-1.27076
EMSC-20130916_0000088	GR	38.735	22.743	KTHA	36.2566	23.0621			NF	20	5.39	277.019	516.09	273	0.05157	-0.0442	0.00023	0.00014	-1.07608	-1.89838	-0.746729	-0.656264	-1.26708
EMSC-20130916_0000088	GR	38.735	22.743	KVLA	40.937	24.3859			NF	20	5.39	282.178	748.058	74	0.06768	-0.09968	-0.0001	-0.00014	-1.44328	-2.18597	-1.22429	-1.22654	-1.46105
EMSC-20130916_0000088	GR	38.735	22.743	MGNA	38.6561	20.7912			NF	20	5.39	169.615	411.497	65	0.03929	0.00081	-1e-05	8e-05	-0.693919	-1.62419	-0.326219	-0.647209	-1.05714
EMSC-20130916_0000088	GR	38.735	22.743	NOAC	37.9738	23.7177			NF	20	5.39	119.942	434.005	96	-0.02322	0.00027	5e-05	6e-05	0.251746	-0.781919	0.68221	0.359705	-0.373002
EMSC-20130916_0000088	GR	38.735	22.743	PRK	39.2456	26.265			NF	20	5.39	309.622	439.853	104	-0.02311	-0.00716	4e-05	3e-05	-1.15476	-1.90366	-0.948581	-0.599609	-1.5943
EMSC-20130916_0000088	GR	38.735	22.743	PSRA	38.5398	25.562			NF	20	5.39	245.799	600	11	-0.00241	-0.0154	5e-05	-2e-05	-1.0058	-1.95931	-0.745552	-0.85349	-1.35702
EMSC-20130916_0000088	GR	38.735	22.743	TNSA	37.5394	25.1631			NF	20	5.39	249.932	498.109	10	-0.00543	-0.03838	0	-6e-05	-0.830721	-1.62695	-0.411662	-0.780412	-1.01604
EMSC-20130916_0000088	GR	38.735	22.743	YDRA	37.3495	23.4653			NF	20	5.39	166.541	693.523	86	-0.04435	0.15921	8e-05	-0.0002	-0.504815	-1.37992	-0.150333	-0.148849	-0.949931
EMSC-20130916_0000088	GR	38.735	22.743	KRBN	38.5936	26.5537			NF	20	5.39	331.207	843.228	94	0.08041	0.05121	1e-05	8e-05	-0.700735	-1.44525	-0.487816	-0.127191	-0.791768
EMSC-20130917_0000023	GR	38.6482	22.7726	ALNA	39.148	23.8667			U	15.3329	4.1	109.788	604.69	8	0.03835	-0.03635	-5e-05	-6e-05	-0.805389	-2.04486	-0.533185	-0.732141	-2.02517
EMSC-20130917_0000023	GR	38.6482	22.7726	DLFA	38.4784	22.4956			U	15.3329	4.1	30.602	900	511	-0.01822	-0.37187	0.00018	-0.00012	0.483496	-1.09165	0.338036	-0.0821694	-1.17894
EMSC-20130917_0000023	GR	38.6482	22.7726	ITM	37.1787	21.9252			U	15.3329	4.1	179.511	844.349	512	-0.01976	-0.08096	0.00025	3e-05	-1.6704	-2.54517	-1.36675	-1.39763	-2.12058
EMSC-20130917_0000023	GR	38.6482	22.7726	NOAC	37.9738	23.7177			U	15.3329	4.1	111.453	434.005	96	-0.02322	0.00027	5e-05	6e-05	-0.348996	-1.54998	0.135339	-0.672628	-1.57449
EMSC-20130917_0000076	TR	39.0296	41.4275	CHAY	41.0918	40.7253			SS	9.671	4.9	236.963	600	4	-0.04339	0.03012	-9e-05	-3e-05	0.0453848	-1.06913	0.449216	0.103777	-0.654632
EMSC-20130917_0000076	TR	39.0296	41.4275	ERCV	39.0198	43.3381			SS	9.671	4.9	165.047	343.689	1668	-0.01091	-0.00365	-2e-05	1e-05	0.673913	-0.0892166	1.05572	0.834007	0.572186
EMSC-20130918_0000105	GR	34.2507	25.1097	IMMV	35.4599	23.9802			TF	30.7025	4.41	169.409	795.072	188	-0.02677	0.13844	6e-05	-0.00015	-1.09656	-2.14297	-0.717307	-0.935004	-1.86339
EMSC-20130918_0000105	GR	34.2507	25.1097	KARP	35.5472	27.1612			TF	30.7025	4.41	236.182	883.296	416	0.15252	-0.10626	5e-05	0.0001	-1.37173	-2.64326	-1.3445	-1.41815	-2.18939
EMSC-20130918_0000105	GR	34.2507	25.1097	GVD	34.8391	24.0874			TF	30.7025	4.41	114.229	669.155	186	0.07511	0.04868	-4e-05	1e-05	-0.45897	-1.71346	0.0329992	-0.714105	-1.76659
EMSC-20130918_0000105	GR	34.2507	25.1097	IACM	35.3058	25.0709			TF	30.7025	4.41	117.375	395.328	66	-0.00016	0.02528	-0.00012	-1e-05	-0.266275	-1.3225	0.201055	-0.120513	-1.40184
EMSC-20130918_0000105	GR	34.2507	25.1097	IMMV	35.4599	23.9802			TF	30.7025	4.41	169.409	795.072	188	-0.02677	0.13844	6e-05	-0.00015	-1.09656	-2.14297	-0.717307	-0.935004	-1.86339
EMSC-20130918_0000105	GR	34.2507	25.1097	ZKR	35.1147	26.217			TF	30.7025	4.41	139.573	745.462	201	0.10514	-0.01014	-0.00019	-4e-05	-1.16692	-2.18767	-0.663009	-0.970823	-1.96818
EMSC-20130920_0000006	GR	38.1694	23.1321	KTHA	36.2566	23.0621			NF	14.8926	4.53	212.784	516.09	273	0.05157	-0.0442	0.00023	0.00014	-1.2373	-2.49461	-0.844546	-1.55579	-2.09137
EMSC-20130920_0000006	GR	38.1694	23.1321	ALNA	39.148	23.8667			NF	14.8926	4.53	126.134	604.69	8	0.03835	-0.03635	-5e-05	-6e-05	-0.37924	-1.57322	0.184064	-0.578288	-1.5944
EMSC-20130920_0000006	GR	38.1694	23.1321	DLFA	38.4784	22.4956			NF	14.8926	4.53	65.2922	900	511	-0.01822	-0.37187	0.00018	-0.00012	-0.0693984	-1.3255	0.356403	-0.719791	-1.46545
EMSC-20130920_0000006	GR	38.1694	23.1321	EFSA	39.5401	24.9886			NF	14.8926	4.53	221.521	477.937	20	-0.02705	0.04364	-2e-05	-7e-05	-1.22513	-2.3754	-0.720402	-1.25095	-2.225
EMSC-20130920_0000006	GR	38.1694	23.1321	ITM	37.1787	21.9252			NF	14.8926	4.53	153.024	844.349	512	-0.01976	-0.08096	0.00025	3e-05	-1.31827	-2.51506	-1.02107	-1.47323	-2.13782
EMSC-20130920_0000006	GR	38.1694	23.1321	KTHA	36.2566	23.0621			NF	14.8926	4.53	212.784	516.09	273	0.05157	-0.0442	0.00023	0.00014	-1.24619	-2.50362	-0.853452	-1.56467	-2.1003
EMSC-20130920_0000006	GR	38.1694	23.1321	MGNA	38.6561	20.7912			NF	14.8926	4.53	211.01	411.497	65	0.03929	0.00081	-1e-05	8e-05	-1.67549	-2.54605	-1.37345	-1.51656	-1.94831
EMSC-20130920_0000006	GR	38.1694	23.1321	MNVA	36.6871	23.0373			NF	14.8926	4.53	165.038	883.644	11	0.09264	0.03325	-0.00021	-4e-05	-1.33507	-2.37593	-0.916822	-1.36959	-1.93743
EMSC-20130920_0000006	GR	38.1694	23.1321	NOAC	37.9738	23.7177			NF	14.8926	4.53	55.6807	434.005	96	-0.02322	0.00027	5e-05	6e-05	0.212493	-1.12241	0.648822	-0.030431	-1.26311
EMSC-20130920_0000006	GR	38.1694	23.1321	PSRA	38.5398	25.562			NF	14.8926	4.53	215.841	600	11	-0.00241	-0.0154	5e-05	-2e-05	-0.659848	-1.96854	-0.319154	-0.972803	-2.07136
EMSC-20130920_0000006	GR	38.1694	23.1321	TNSA	37.5394	25.1631			NF	14.8926	4.53	191.575	498.109	10	-0.00543	-0.03838	0	-6e-05	-0.394791	-1.87806	0.00436094	-1.02137	-1.83844
EMSC-20130920_0000006	GR	38.1694	23.1321	YDRA	37.3495	23.4653			NF	14.8926	4.53	95.7614	693.523	86	-0.04435	0.15921	8e-05	-0.0002	-0.197044	-1.48444	0.331259	-0.577554	-1.4522
EMSC-20131011_0000017	GR	40.6878	23.3938	KBN	40.6232	20.7874	742	MASW	NF	18.9	4.3	219.977	742	904	-0.0647	0.02283	-6e-05	6e-05	-1.5881	-2.57724	-1.00258	-1.28143	-2.32848
EMSC-20131011_0000017	GR	40.6878	23.3938	ALNA	39.148	23.8667			NF	18.9	4.3	175.898	604.69	8	0.03835	-0.03635	-5e-05	-6e-05	-1.3115	-2.28458	-0.870672	-1.00341	-2.06904
EMSC-20131011_0000017	GR	40.6878	23.3938	KVLA	40.937	24.3859			NF	18.9	4.3	87.9731	748.058	74	0.06768	-0.09968	-0.0001	-0.00014	0.399202	-0.984587	0.788026	-0.325614	-1.34724
EMSC-20131011_0000017	GR	40.6878	23.3938	LIA	39.8972	25.1806			NF	18.9	4.3	175.187	464.17	45	0.04683	-0.0177	-3e-05	-1e-05	-1.10118	-2.2935	-0.567184	-1.19919	-2.32459
EMSC-20131011_0000017	GR	40.6878	23.3938	SMTH	40.4709	25.5304			NF	18.9	4.3	182.046	900	356	-0.27133	-0.01567	-0.00034	0.00014	-1.12499	-2.61936	-0.842142	-1.80446	-2.74562
EMSC-20131019_0000063	GR	34.7074	25.1194	IMMV	35.4599	23.9802			SS	7.7075	4.46	133.213	795.072	188	-0.02677	0.13844	6e-05	-0.00015	-0.811226	-2.01897	-0.183092	-0.824269	-1.82614
EMSC-20131019_0000063	GR	34.7074	25.1194	KARP	35.5472	27.1612			SS	7.7075	4.46	207.84	883.296	416	0.15252	-0.10626	5e-05	0.0001	-1.51681	-2.36837	-1.1494	-0.991304	-2.20645
EMSC-20131019_0000063	GR	34.7074	25.1194	ANKY	35.867	23.3012			SS	7.7075	4.46	209.426	619.572	100	-0.0098	0.05556	-0.00012	-3e-05	-1.46067	-2.48446	-0.88983	-1.2844	-2.0615
EMSC-20131019_0000063	GR	34.7074	25.1194	GVD	34.8391	24.0874			SS	7.7075	4.46	95.3928	669.155	186	0.07511	0.04868	-4e-05	1e-05	-0.316225	-1.62565	0.200122	-0.667866	-1.65314
EMSC-20131019_0000063	GR	34.7074	25.1194	IACM	35.3058	25.0709			SS	7.7075	4.46	66.6855	395.328	66	-0.00016	0.02528	-0.00012	-1e-05	0.302462	-0.886964	0.853012	0.144604	-0.980757
EMSC-20131019_0000063	GR	34.7074	25.1194	IMMV	35.4599	23.9802			SS	7.7075	4.46	133.213	795.072	188	-0.02677	0.13844	6e-05	-0.00015	-0.82013	-2.02792	-0.191995	-0.833172	-1.83505
EMSC-20131019_0000063	GR	34.7074	25.1194	ZKR	35.1147	26.217			SS	7.7075	4.46	109.853	745.462	201	0.10514	-0.01014	-0.00019	-4e-05	-0.801067	-1.98655	-0.373646	-0.803537	-1.84037
EMSC-20131105_0000087	GR	34.6157	24.974	IMMV	35.4599	23.9802			U	11.5732	4.1	130.375	795.072	188	-0.02677	0.13844	6e-05	-0.00015	-1.20365	-2.39059	-0.680361	-1.14553	-2.30293
EMSC-20131105_0000087	GR	34.6157	24.974	GVD	34.8391	24.0874			U	11.5732	4.1	84.7497	669.155	186	0.07511	0.04868	-4e-05	1e-05	-0.551523	-1.83541	-0.0245949	-0.912597	-2.04809
EMSC-20131105_0000087	GR	34.6157	24.974	IACM	35.3058	25.0709			U	11.5732	4.1	77.242	395.328	66	-0.00016	0.02528	-0.00012	-1e-05	0.0401107	-1.12899	0.439506	0.034692	-1.28412
EMSC-20131105_0000087	GR	34.6157	24.974	IMMV	35.4599	23.9802			U	11.5732	4.1	130.375	795.072	188	-0.02677	0.13844	6e-05	-0.00015	-1.20365	-2.39059	-0.680362	-1.14553	-2.30293
EMSC-20131105_0000087	GR	34.6157	24.974	ZKR	35.1147	26.217			U	11.5732	4.1	126.25	745.462	201	0.10514	-0.01014	-0.00019	-4e-05	-0.779791	-2.09523	-0.261704	-1.20464	-2.34812
EMSC-20131107_0000014	TR	37.3894	36.1771	NIG	38.108	34.6142			U	10.8926	4.1	158.953	665.455	2155	0.08773	-0.06392	3e-05	0.00021	-0.45038	-1.37225	-0.140957	-0.282896	-1.40021
EMSC-20131112_0000077	GR	38.921	23.099	KBN	40.6232	20.7874	742	MASW	SS	1.8	4.9	273.576	742	904	-0.0647	0.02283	-6e-05	6e-05	-1.17517	-1.95698	-1.13619	-0.947009	-1.58076
EMSC-20131112_0000077	GR	38.921	23.099	ALNA	39.148	23.8667			SS	1.8	4.9	70.9504	604.69	8	0.03835	-0.03635	-5e-05	-6e-05	0.410506	-0.809131	0.705243	0.326474	-0.766934
EMSC-20131112_0000077	GR	38.921	23.099	DLFA	38.4784	22.4956			SS	1.8	4.9	71.8603	900	511	-0.01822	-0.37187	0.00018	-0.00012	0.354121	-0.829707	0.673373	0.383484	-0.66962
EMSC-20131112_0000077	GR	38.921	23.099	EFSA	39.5401	24.9886			SS	1.8	4.9	176.716	477.937	20	-0.02705	0.04364	-2e-05	-7e-05	-0.497103	-1.39181	-0.129987	-0.213074	-0.914034
EMSC-20131112_0000077	GR	38.921	23.099	ITM	37.1787	21.9252			SS	1.8	4.9	219.303	844.349	512	-0.01976	-0.08096	0.00025	3e-05	-1.06318	-1.9104	-0.656536	-0.656282	-1.54086
EMSC-20131112_0000077	GR	38.921	23.099	JAN	39.6562	20.8487			SS	1.8	4.9	210.198	435.911	515	0.01206	-0.02499	3e-05	1e-05	-1.08254	-1.85623	-0.54592	-0.923845	-1.26904
EMSC-20131112_0000077	GR	38.921	23.099	LIA	39.8972	25.1806			SS	1.8	4.9	209.191	464.17	45	0.04683	-0.0177	-3e-05	-1e-05	-1.00945	-1.96079	-0.543056	-0.840213	-1.47047
EMSC-20131112_0000077	GR	38.921	23.099	MGNA	38.6561	20.7912			SS	1.8	4.9	202.178	411.497	65	0.03929	0.00081	-1e-05	8e-05	-1.31415	-2.02984	-1.04776	-1.06102	-1.52413
EMSC-20131112_0000077	GR	38.921	23.099	NOAC	37.9738	23.7177			SS	1.8	4.9	118.299	434.005	96	-0.02322	0.00027	5e-05	6e-05	0.358373	-0.900508	0.997638	-0.0526427	-0.950047
EMSC-20131112_0000077	GR	38.921	23.099	PLG	40.3733	23.4444			SS	1.8	4.9	164.172	493.142	535	-0.05298	-0.01891	-1e-05	-1e-05	-0.842915	-1.98639	-0.34224	-1.01296	-1.56268
EMSC-20131112_0000077	GR	38.921	23.099	PSRA	38.5398	25.562			SS	1.8	4.9	217.807	600	11	-0.00241	-0.0154	5e-05	-2e-05	-0.868086	-1.97773	-0.482029	-0.919655	-1.48674
EMSC-20131112_0000077	GR	38.921	23.099	YDRA	37.3495	23.4653			SS	1.8	4.9	177.658	693.523	86	-0.04435	0.15921	8e-05	-0.0002	-0.517907	-1.5321	0.0567523	-0.48123	-1.33884
EMSC-20131124_0000070	TR	40.8228	31.8538	ANTO	39.868	32.7934			TF	10.1039	4.82	132.711	612.65	1055	-0.02595	0.06809	3e-05	-4e-05	0.121408	-1.02962	0.383663	0.171137	-1.01645
EMSC-20131124_0000070	TR	40.8228	31.8538	ESKT	39.5212	30.8492			TF	10.1039	4.82	168.023	649.232	1204	-0.07431	0.07917	0.0004	0.00011	0.148163	-0.95614	0.645103	0.0837096	-0.659677
EMSC-20131124_0000070	TR	40.8228	31.8538	GRDE	40.7995	32.2116			TF	10.1039	4.82	30.2236	551.992	1327	-0.00835	-0.04363	4e-05	3e-05	1.68253	0.49238	1.88302	1.47365	0.423759
EMSC-20131124_0000070	TR	40.8228	31.8538	SAFT	41.2398	32.6872			TF	10.1039	4.82	83.8851	461.068	415	0.00751	-0.04052	-9e-05	-1e-05	0.838847	-0.643761	0.901421	0.168088	-0.611501
EMSC-20131124_0000070	TR	40.8228	31.8538	TOS	41.0362	34.0225			TF	10.1039	4.82	183.725	666.676	1098	0.06654	-0.12845	-3e-05	3e-05	-0.356051	-1.23229	0.11147	-0.0701478	-0.724957
EMSC-20131124_0000070	TR	40.8228	31.8538	YUVA	40.391	31.6872			TF	10.1039	4.82	50.0314	629.043	1131	-0.04558	-0.07565	0.00018	2e-05	1.28209	0.00542195	1.66681	1.0741	0.409567
EMSC-20131127_0000013	TR	40.8739	27.911	SMTH	40.4709	25.5304			NF	2.5191	4.5	205.697	900	356	-0.27133	-0.01567	-0.00034	0.00014	-0.490286	-1.7854	-0.0795112	-0.809856	-1.46993
EMSC-20131127_0000013	TR	40.8739	27.911	AKS	38.8785	27.8129			NF	2.5191	4.5	222.036	541.408	331	0.04978	0.04567	0.00012	0.00025	-0.0546319	-1.27706	0.409691	-0.139913	-1.09464
EMSC-20131127_0000013	TR	40.8739	27.911	ENZZ	40.607	26.1406			NF	2.5191	4.5	152.076	377.603	9	0.01099	-0.01243	-2e-05	-2e-05	1.0379	-0.0217026	1.52629	1.03374	0.215401
EMSC-20131127_0000013	TR	40.8739	27.911	GOKC	40.1998	25.9183			NF	2.5191	4.5	184.32	629.889	143	-0.10552	0.02364	-6e-05	-3e-05	0.504362	-0.787503	0.980112	0.337306	-0.48171
EMSC-20131127_0000013	TR	40.8739	27.911	GPNR	39.4552	26.1329			NF	2.5191	4.5	218.427	664.563	14	-0.00819	-0.06363	-1e-05	-0.0001	0.45987	-0.734543	1.11656	0.391433	-0.48056
EMSC-20131127_0000013	TR	40.8739	27.911	IZI	40.3368	29.4728			NF	2.5191	4.5	144.74	838.565	836	-0.02542	-0.07619	0.00022	0.00011	-0.0665405	-1.07788	0.402467	0.0510254	-0.579986
EMSC-20131127_0000013	TR	40.8739	27.911	SMAA	39.1005	28.9805			NF	2.5191	4.5	217.222	274.72	799	-0.00364	0.00311	0	0	-0.00503984	-0.977376	0.47688	0.33585	-0.711997
EMSC-20131127_0000013	TR	40.8739	27.911	UKOP	41.1288	26.6322			NF	2.5191	4.5	110.993	342.022	67	0.00357	-0.01594	0	0	1.13117	-0.106125	1.67389	0.750742	-0.2625
EMSC-20131127_0000014	TR	40.8295	27.9113	GONE	40.0466	27.686			U	14.9266	4	89.1181	440.139	144	-0.03639	0.04445	-0.00014	-2e-05	-0.205175	-1.52649	0.143325	-0.623245	-1.77415
EMSC-20131127_0000014	TR	40.8295	27.9113	SMAA	39.1005	28.9805			U	14.9266	4	212.752	274.72	799	-0.00364	0.00311	0	0	-0.445371	-1.76618	0.126393	-0.541398	-1.74305
EMSC-20131127_0000014	TR	40.8295	27.9113	UKOP	41.1288	26.6322			U	14.9266	4	112.414	342.022	67	0.00357	-0.01594	0	0	-0.0417736	-1.26625	0.391001	-0.531266	-1.40127
EMSC-20131127_0000052	GR	37.3348	23.0233	KTHA	36.2566	23.0621			NF	12.6	4.5	119.94	516.09	273	0.05157	-0.0442	0.00023	0.00014	-0.420691	-1.77448	0.0183629	-0.938921	-1.92891
EMSC-20131127_0000052	GR	37.3348	23.0233	ALNA	39.148	23.8667			NF	12.6	4.5	214.653	604.69	8	0.03835	-0.03635	-5e-05	-6e-05	-1.05903	-2.07051	-0.713333	-0.831036	-1.88553
EMSC-20131127_0000052	GR	37.3348	23.0233	ANKY	35.867	23.3012			NF	12.6	4.5	165.081	619.572	100	-0.0098	0.05556	-0.00012	-3e-05	-0.92085	-2.13724	-0.362564	-1.10544	-2.08309
EMSC-20131127_0000052	GR	37.3348	23.0233	DLFA	38.4784	22.4956			NF	12.6	4.5	135.325	900	511	-0.01822	-0.37187	0.00018	-0.00012	-0.470678	-1.82255	-0.0434626	-0.894081	-2.03286
EMSC-20131127_0000052	GR	37.3348	23.0233	ITM	37.1787	21.9252			NF	12.6	4.5	98.7208	844.349	512	-0.01976	-0.08096	0.00025	3e-05	-0.363563	-1.64203	0.0733574	-0.819101	-1.87212
EMSC-20131127_0000052	GR	37.3348	23.0233	KTHA	36.2566	23.0621			NF	12.6	4.5	119.94	516.09	273	0.05157	-0.0442	0.00023	0.00014	-0.429508	-1.78431	0.00942592	-0.948227	-1.96111
EMSC-20131127_0000052	GR	37.3348	23.0233	MNVA	36.6871	23.0373			NF	12.6	4.5	72.0329	883.644	11	0.09264	0.03325	-0.00021	-4e-05	-0.505715	-1.77296	-0.0321966	-0.912874	-1.8885
EMSC-20131127_0000052	GR	37.3348	23.0233	NOAC	37.9738	23.7177			NF	12.6	4.5	93.7325	434.005	96	-0.02322	0.00027	5e-05	6e-05	-0.137981	-1.46433	0.218356	-0.475458	-1.4179
EMSC-20131127_0000052	GR	37.3348	23.0233	TNSA	37.5394	25.1631			NF	12.6	4.5	190.286	498.109	10	-0.00543	-0.03838	0	-6e-05	-0.74188	-2.16868	-0.560894	-1.28613	-2.26775
EMSC-20131127_0000052	GR	37.3348	23.0233	YDRA	37.3495	23.4653			NF	12.6	4.5	39.1073	693.523	86	-0.04435	0.15921	8e-05	-0.0002	0.592136	-0.977746	0.808201	-0.19421	-1.36988
EMSC-20131211_0000038	GR	39.0428	22.3491	KBN	40.6232	20.7874	742	MASW	U	17.16	4.3	220.591	742	904	-0.0647	0.02283	-6e-05	6e-05	-1.66701	-2.66543	-1.13468	-1.48777	-2.31798
EMSC-20131211_0000038	GR	39.0428	22.3491	SRN	39.8789	20.0061	1512	MASW	U	17.16	4.3	221.581	1512	78	-0.00912	-0.13807	-0.00012	-0.00011	-1.51269	-2.54466	-1.10922	-1.31243	-2.12447
EMSC-20131211_0000038	GR	39.0428	22.3491	ALNA	39.148	23.8667			U	17.16	4.3	131.485	604.69	8	0.03835	-0.03635	-5e-05	-6e-05	-1.07443	-2.18634	-0.82105	-0.892515	-2.1045
EMSC-20131211_0000038	GR	39.0428	22.3491	DLFA	38.4784	22.4956			U	17.16	4.3	64.0337	900	511	-0.01822	-0.37187	0.00018	-0.00012	0.276104	-1.17628	0.577947	-0.406176	-1.55697
EMSC-20131211_0000038	GR	39.0428	22.3491	ITM	37.1787	21.9252			U	17.16	4.3	210.567	844.349	512	-0.01976	-0.08096	0.00025	3e-05	-1.17847	-2.30937	-0.702785	-1.40402	-2.17034
EMSC-20131211_0000038	GR	39.0428	22.3491	JAN	39.6562	20.8487			U	17.16	4.3	145.926	435.911	515	0.01206	-0.02499	3e-05	1e-05	-0.779951	-1.95655	-0.263793	-0.8222	-1.93188
EMSC-20131211_0000038	GR	39.0428	22.3491	KASA	39.7463	19.9354			U	17.16	4.3	221.66	900	41	0.09573	-0.04553	-0.00012	1e-05	-1.39733	-2.4376	-0.806282	-1.3576	-2.07283
EMSC-20131211_0000038	GR	39.0428	22.3491	MGNA	38.6561	20.7912			U	17.16	4.3	141.6	411.497	65	0.03929	0.00081	-1e-05	8e-05	-0.749764	-1.85471	-0.256647	-0.860742	-1.89893
EMSC-20131211_0000038	GR	39.0428	22.3491	NOAC	37.9738	23.7177			U	17.16	4.3	168.248	434.005	96	-0.02322	0.00027	5e-05	6e-05	-0.834639	-2.12548	-0.257135	-1.1387	-2.02249
EMSC-20131211_0000038	GR	39.0428	22.3491	PLG	40.3733	23.4444			U	17.16	4.3	175.114	493.142	535	-0.05298	-0.01891	-1e-05	-1e-05	-1.66517	-2.80313	-1.34612	-1.5556	-2.46361
EMSC-20131211_0000038	GR	39.0428	22.3491	YDRA	37.3495	23.4653			U	17.16	4.3	212.05	693.523	86	-0.04435	0.15921	8e-05	-0.0002	-1.22676	-2.41807	-0.775671	-1.21255	-2.11863
EMSC-20131215_0000075	GR	34.9346	25.6859	IMMV	35.4599	23.9802			U	11.209	4.2	165.627	795.072	188	-0.02677	0.13844	6e-05	-0.00015	-1.37462	-2.4466	-0.904593	-1.12973	-2.19913
EMSC-20131215_0000075	GR	34.9346	25.6859	KARP	35.5472	27.1612			U	11.209	4.2	150.301	883.296	416	0.15252	-0.10626	5e-05	0.0001	-1.14065	-2.27931	-0.674264	-1.15022	-2.27545
EMSC-20131215_0000075	GR	34.9346	25.6859	GVD	34.8391	24.0874			U	11.209	4.2	146.187	669.155	186	0.07511	0.04868	-4e-05	1e-05	-1.28277	-2.37393	-0.837521	-1.22321	-2.21337
EMSC-20131215_0000075	GR	34.9346	25.6859	IACM	35.3058	25.0709			U	11.209	4.2	69.5153	395.328	66	-0.00016	0.02528	-0.00012	-1e-05	-0.196528	-1.35785	0.256304	-0.208482	-1.28381
EMSC-20131215_0000075	GR	34.9346	25.6859	IMMV	35.4599	23.9802			U	11.209	4.2	165.627	795.072	188	-0.02677	0.13844	6e-05	-0.00015	-1.49252	-2.58845	-1.00528	-1.35942	-2.40425
EMSC-20131215_0000075	GR	34.9346	25.6859	KARP	35.5471	27.1611			U	11.209	4.2	150.285	883.296	416	0.15252	-0.10626	5e-05	0.0001	-1.14977	-2.28613	-0.683137	-1.15935	-2.29772
EMSC-20131215_0000075	GR	34.9346	25.6859	ZKR	35.1147	26.217			U	11.209	4.2	52.3433	745.462	201	0.10514	-0.01014	-0.00019	-4e-05	0.33039	-1.10166	0.588527	-0.553264	-1.58589
EMSC-20131218_0000088	GR	39.8293	25.4162	ALNA	39.148	23.8667			SS	6.2	4.1	153.031	604.69	8	0.03835	-0.03635	-5e-05	-6e-05	-0.80168	-1.86425	-0.521655	-0.645114	-1.95251
EMSC-20131218_0000088	GR	39.8293	25.4162	EFSA	39.5401	24.9886			SS	6.2	4.1	48.707	477.937	20	-0.02705	0.04364	-2e-05	-7e-05	0.473982	-1.04853	0.716012	-0.218047	-1.29858
EMSC-20131218_0000088	GR	39.8293	25.4162	KVLA	40.937	24.3859			SS	6.2	4.1	150.952	748.058	74	0.06768	-0.09968	-0.0001	-0.00014	-0.490451	-1.85404	-0.0427817	-1.13911	-2.09934
EMSC-20131218_0000088	GR	39.8293	25.4162	LIA	39.8972	25.1806			SS	6.2	4.1	21.4852	464.17	45	0.04683	-0.0177	-3e-05	-1e-05	1.15582	-0.351612	1.21379	0.273839	-0.724569
EMSC-20131218_0000088	GR	39.8293	25.4162	PLG	40.3733	23.4444			SS	6.2	4.1	178.276	493.142	535	-0.05298	-0.01891	-1e-05	-1e-05	-0.721954	-2.08713	-0.209594	-1.47026	-2.24925
EMSC-20131218_0000088	GR	39.8293	25.4162	PRK	39.2456	26.265			SS	6.2	4.1	97.5178	439.853	104	-0.02311	-0.00716	4e-05	3e-05	-0.438918	-1.67292	-0.024117	-0.458234	-1.65789
EMSC-20131218_0000088	GR	39.8293	25.4162	PSRA	38.5398	25.562			SS	6.2	4.1	143.938	600	11	-0.00241	-0.0154	5e-05	-2e-05	-0.594804	-1.98433	-0.252986	-1.14669	-2.3127
EMSC-20131218_0000088	GR	39.8293	25.4162	SMTH	40.4709	25.5304			SS	6.2	4.1	72.0049	900	356	-0.27133	-0.01567	-0.00034	0.00014	-0.340981	-1.92696	-0.452366	-1.06224	-2.09726
EMSC-20131218_0000088	GR	39.8293	25.4162	ENZZ	40.607	26.1406			SS	6.2	4.1	106.118	377.603	9	0.01099	-0.01243	-2e-05	-2e-05	1.0112	-0.281937	1.26596	0.637823	-0.496794
EMSC-20131218_0000088	GR	39.8293	25.4162	FOCM	38.7131	26.7309			SS	6.2	4.1	167.962	553.331	7	-0.0426	-0.00284	-0.0001	1e-05	-0.394313	-1.57444	0.0185056	-0.392588	-1.42356
EMSC-20131218_0000088	GR	39.8293	25.4162	GOKC	40.1998	25.9183			SS	6.2	4.1	59.3771	629.889	143	-0.10552	0.02364	-6e-05	-3e-05	0.766994	-0.710292	1.11045	0.332014	-0.828738
EMSC-20131218_0000088	GR	39.8293	25.4162	GONE	40.0466	27.686			SS	6.2	4.1	195.015	440.139	144	-0.03639	0.04445	-0.00014	-2e-05	-0.445069	-1.64321	-0.0211566	-0.474623	-1.44933
EMSC-20131218_0000088	GR	39.8293	25.4162	UKOP	41.1288	26.6322			SS	6.2	4.1	177.358	342.022	67	0.00357	-0.01594	0	0	0.00563791	-1.03327	0.34364	0.0190554	-1.04972
EMSC-20131224_0000017	GR	34.8385	26.2489	IMMV	35.4599	23.9802			NF	20.8646	4.3	217.526	795.072	188	-0.02677	0.13844	6e-05	-0.00015	-0.998572	-2.05527	-0.502825	-0.783979	-1.88356
EMSC-20131224_0000017	GR	34.8385	26.2489	KARP	35.5472	27.1612			NF	20.8646	4.3	114.378	883.296	416	0.15252	-0.10626	5e-05	0.0001	-0.395697	-1.43145	-0.100642	-0.273513	-1.53616
EMSC-20131224_0000017	GR	34.8385	26.2489	AMGA	36.8316	25.8938			NF	20.8646	4.3	223.918	625.424	282	-0.01177	-0.0446	0.00022	3e-05	-1.25695	-2.46721	-0.846208	-1.52563	-2.27505
EMSC-20131224_0000017	GR	34.8385	26.2489	GVD	34.8391	24.0874			NF	20.8646	4.3	197.266	669.155	186	0.07511	0.04868	-4e-05	1e-05	-1.16058	-2.2156	-0.62258	-0.996221	-1.83261
EMSC-20131224_0000017	GR	34.8385	26.2489	IACM	35.3058	25.0709			NF	20.8646	4.3	119.132	395.328	66	-0.00016	0.02528	-0.00012	-1e-05	0.21863	-0.908093	0.739395	0.22152	-1.05227
EMSC-20131224_0000017	GR	34.8385	26.2489	IMMV	35.4599	23.9802			NF	20.8646	4.3	217.526	795.072	188	-0.02677	0.13844	6e-05	-0.00015	-1.00748	-2.0642	-0.511728	-0.79288	-1.89244
EMSC-20131224_0000017	GR	34.8385	26.2489	KARP	35.5471	27.1611			NF	20.8646	4.3	114.361	883.296	416	0.15252	-0.10626	5e-05	0.0001	-0.404727	-1.44173	-0.109589	-0.282483	-1.54815
EMSC-20131224_0000017	GR	34.8385	26.2489	ZKR	35.1147	26.217			NF	20.8646	4.3	30.8493	745.462	201	0.10514	-0.01014	-0.00019	-4e-05	1.09043	-0.371101	1.26098	0.379014	-0.616426
EMSC-20140106_0000064	GR	34.8689	24.018	IMMV	35.4599	23.9802			U	32.4198	4	65.8059	795.072	188	-0.02677	0.13844	6e-05	-0.00015	-0.759585	-2.08589	-0.10981	-1.11924	-2.39273
EMSC-20140106_0000064	GR	34.8689	24.018	GVD	34.8391	24.0874			U	32.4198	4	7.14347	669.155	186	0.07511	0.04868	-4e-05	1e-05	0.686169	-0.881283	0.801863	-0.595262	-1.48507
EMSC-20140107_0000078	TR	39.7813	26.1043	EFSA	39.5401	24.9886			U	11.7773	4	99.1949	477.937	20	-0.02705	0.04364	-2e-05	-7e-05	-0.716487	-2.00915	-0.503042	-0.995743	-2.01694
EMSC-20140107_0000078	TR	39.7813	26.1043	LIA	39.8972	25.1806			U	11.7773	4	79.9167	464.17	45	0.04683	-0.0177	-3e-05	-1e-05	-0.624653	-2.08451	-0.460537	-1.26165	-2.27716
EMSC-20140107_0000078	TR	39.7813	26.1043	PRK	39.2456	26.265			U	11.7773	4	61.1358	439.853	104	-0.02311	-0.00716	4e-05	3e-05	-0.453991	-1.75374	-0.138069	-0.617943	-1.95008
EMSC-20140107_0000078	TR	39.7813	26.1043	PSRA	38.5398	25.562			U	11.7773	4	145.752	600	11	-0.00241	-0.0154	5e-05	-2e-05	-0.669672	-2.13914	-0.422365	-1.53793	-2.60758
EMSC-20140107_0000078	TR	39.7813	26.1043	SMTH	40.4709	25.5304			U	11.7773	4	90.8895	900	356	-0.27133	-0.01567	-0.00034	0.00014	-0.267766	-1.86067	-0.136471	-1.24051	-2.34117
EMSC-20140107_0000078	TR	39.7813	26.1043	ENZZ	40.607	26.1406			U	11.7773	4	91.8654	377.603	9	0.01099	-0.01243	-2e-05	-2e-05	0.530919	-0.794241	0.997701	0.0665322	-1.13771
EMSC-20140107_0000078	TR	39.7813	26.1043	GMLD	38.0764	26.8747			U	11.7773	4	200.946	506.73	140	-0.02582	-0.03851	2e-05	1e-05	-0.486266	-1.69234	-0.0621872	-0.840059	-1.74117
EMSC-20140107_0000078	TR	39.7813	26.1043	GONE	40.0466	27.686			U	11.7773	4	138.085	440.139	144	-0.03639	0.04445	-0.00014	-2e-05	-0.263031	-1.49452	0.0454487	-0.274813	-1.58669
EMSC-20140107_0000078	TR	39.7813	26.1043	GPNR	39.4552	26.1329			U	11.7773	4	36.3433	664.563	14	-0.00819	-0.06363	-1e-05	-0.0001	0.650263	-0.823226	0.993326	-0.035168	-1.15182
EMSC-20140107_0000078	TR	39.7813	26.1043	KRBN	38.5936	26.5537			U	11.7773	4	137.628	843.228	94	0.08041	0.05121	1e-05	8e-05	-0.181422	-1.39723	0.0449326	-0.207279	-1.4754
EMSC-20140110_0000027	TR	39.4444	27.9638	PRK	39.2456	26.265			U	15.9397	4	147.743	439.853	104	-0.02311	-0.00716	4e-05	3e-05	-0.896734	-2.08956	-0.514722	-0.957119	-2.12608
EMSC-20140110_0000027	TR	39.4444	27.9638	AKS	38.8785	27.8129			U	15.9397	4	64.2561	541.408	331	0.04978	0.04567	0.00012	0.00025	0.399742	-1.09722	0.786301	-0.433967	-1.39723
EMSC-20140110_0000027	TR	39.4444	27.9638	ENZZ	40.607	26.1406			U	15.9397	4	202.012	377.603	9	0.01099	-0.01243	-2e-05	-2e-05	-0.351644	-1.49784	-0.0994171	-0.506931	-1.66985
EMSC-20140110_0000027	TR	39.4444	27.9638	FOCM	38.7131	26.7309			U	15.9397	4	133.931	553.331	7	-0.0426	-0.00284	-0.0001	1e-05	-0.389344	-1.91019	-0.124026	-0.997672	-1.71836
EMSC-20140110_0000027	TR	39.4444	27.9638	GOMA	38.7077	27.9175			U	15.9397	4	82.0147	636.467	132	0.07518	0.04702	-7e-05	-4e-05	0.452126	-0.990694	0.732156	-0.399412	-1.28661
EMSC-20140110_0000027	TR	39.4444	27.9638	GONE	40.0466	27.686			U	15.9397	4	71.0489	440.139	144	-0.03639	0.04445	-0.00014	-2e-05	0.217488	-1.11267	0.688943	-0.468627	-1.42752
EMSC-20140110_0000027	TR	39.4444	27.9638	SHAP	39.0231	29.222			U	15.9397	4	118.058	495.541	1009	-0.00572	-0.03743	-0.00018	0	0.490026	-0.984658	0.908775	-0.53527	-1.49491
EMSC-20140110_0000027	TR	39.4444	27.9638	SMAA	39.1005	28.9805			U	15.9397	4	95.5072	274.72	799	-0.00364	0.00311	0	0	0.375216	-0.845276	0.923977	-0.0294794	-1.12101
EMSC-20140110_0000051	TR	37.2899	36.2178	CMRD	37.6623	34.9902			U	5.4518	4	115.976	425.899	1273	0.04896	-0.03541	-4e-05	-9e-05	-0.750869	-1.91093	-0.362947	-0.99935	-2.12949
EMSC-20140110_0000051	TR	37.2899	36.2178	KHMN	37.3916	37.1574			U	5.4518	4	83.8309	272.353	599	-0.0127	0.00068	-1e-05	0	0.93595	-0.757277	0.805393	-0.169653	-1.22219
EMSC-20140124_0000078	GR	38.33	22.0004	DLFA	38.4784	22.4956			NF	7.1866	4.25	46.1997	900	511	-0.01822	-0.37187	0.00018	-0.00012	-0.497251	-1.92626	-0.222166	-0.679864	-1.78584
EMSC-20140124_0000078	GR	38.33	22.0004	ITM	37.1787	21.9252			NF	7.1866	4.25	128.187	844.349	512	-0.01976	-0.08096	0.00025	3e-05	-1.53146	-2.53447	-1.02153	-1.47659	-2.16675
EMSC-20140124_0000078	GR	38.33	22.0004	JAN	39.6562	20.8487			NF	7.1866	4.25	177.904	435.911	515	0.01206	-0.02499	3e-05	1e-05	-1.6063	-2.67024	-1.13765	-1.44054	-2.4244
EMSC-20140124_0000078	GR	38.33	22.0004	MGNA	38.6561	20.7912			NF	7.1866	4.25	111.31	411.497	65	0.03929	0.00081	-1e-05	8e-05	-1.03086	-2.46802	-0.765321	-1.47674	-2.32357
EMSC-20140124_0000078	GR	38.33	22.0004	NOAC	37.9738	23.7177			NF	7.1866	4.25	155.292	434.005	96	-0.02322	0.00027	5e-05	6e-05	-1.55216	-2.72783	-1.06858	-1.44019	-2.20293
EMSC-20140124_0000078	GR	38.33	22.0004	VLMS	37.8766	20.6628			NF	7.1866	4.25	127.431	533.941	435	-0.06411	-0.00189	-3e-05	5e-05	-0.47403	-1.8854	-0.0274588	-1.17705	-2.22037
EMSC-20140126_0000046	GR	38.1522	20.3912	BERA1	40.7082	19.9455	1007	MASW	SS	15	6.19	286.775	1007	126	-0.03639	0.04255	0.0003	-0.00019	0.180286	-0.605366	0.546785	0.455706	-0.0732914
EMSC-20140126_0000046	GR	38.1522	20.3912	KBN	40.6232	20.7874	742	MASW	SS	15	6.19	276.863	742	904	-0.0647	0.02283	-6e-05	6e-05	-0.0413093	-0.498265	0.120214	0.347719	-0.0636951
EMSC-20140126_0000046	GR	38.1522	20.3912	KKS	42.0756	20.4113	745	MASW	SS	15	6.19	436.266	745	319	-0.02773	0.00257	-3e-05	3e-05	-0.460703	-0.892736	-0.21374	-0.125256	-0.241869
EMSC-20140126_0000046	GR	38.1522	20.3912	LSK	40.1499	20.5987	818	MASW	SS	15	6.19	222.853	818	914	0.02412	-0.04688	-0.00031	0.00017	0.508502	-0.191522	0.635807	1.06891	0.303151
EMSC-20140126_0000046	GR	38.1522	20.3912	VLO	40.4704	19.4965	375	MASW	SS	15	6.19	269.015	375	39	-0.04404	-0.00932	1e-05	1e-05	0.354945	-0.441878	0.804381	0.525653	0.167854
EMSC-20140126_0000046	GR	38.1522	20.3912	IMMV	35.4599	23.9802			SS	15	6.19	437.79	795.072	188	-0.02677	0.13844	6e-05	-0.00015	-0.755697	-1.31399	-0.240727	-0.293881	-0.740588
EMSC-20140126_0000046	GR	38.1522	20.3912	KTHA	36.2566	23.0621			SS	15	6.19	316.806	516.09	273	0.05157	-0.0442	0.00023	0.00014	-0.466276	-1.04175	-0.130126	-0.0444031	-0.303596
EMSC-20140126_0000046	GR	38.1522	20.3912	ALNA	39.148	23.8667			SS	15	6.19	321.458	604.69	8	0.03835	-0.03635	-5e-05	-6e-05	-0.440948	-0.87626	-0.277537	-0.0354323	-0.287813
EMSC-20140126_0000046	GR	38.1522	20.3912	ANKY	35.867	23.3012			SS	15	6.19	362.353	619.572	100	-0.0098	0.05556	-0.00012	-3e-05	-0.664631	-1.05822	-0.32037	-0.149602	-0.593619
EMSC-20140126_0000046	GR	38.1522	20.3912	DLFA	38.4784	22.4956			SS	15	6.19	187.144	900	511	-0.01822	-0.37187	0.00018	-0.00012	0.16327	-0.549784	0.434187	0.601366	-0.0675242
EMSC-20140126_0000046	GR	38.1522	20.3912	EFSA	39.5401	24.9886			SS	15	6.19	426.948	477.937	20	-0.02705	0.04364	-2e-05	-7e-05	-0.863426	-1.22918	-0.812298	-0.414127	-0.478507
EMSC-20140126_0000046	GR	38.1522	20.3912	IMMV	35.4599	23.9802			SS	15	6.19	437.79	795.072	188	-0.02677	0.13844	6e-05	-0.00015	-0.7646	-1.3229	-0.249629	-0.302784	-0.74949
EMSC-20140126_0000046	GR	38.1522	20.3912	ITM	37.1787	21.9252			SS	15	6.19	173.054	844.349	512	-0.01976	-0.08096	0.00025	3e-05	0.241311	-0.617282	0.699374	0.32942	-0.0550637
EMSC-20140126_0000046	GR	38.1522	20.3912	JAN	39.6562	20.8487			SS	15	6.19	171.855	435.911	515	0.01206	-0.02499	3e-05	1e-05	0.647341	-0.157987	0.944139	0.7823	0.407708
EMSC-20140126_0000046	GR	38.1522	20.3912	KASA	39.7463	19.9354			SS	15	6.19	181.582	900	41	0.09573	-0.04553	-0.00012	1e-05	0.538414	-0.454833	1.00012	0.696779	0.246749
EMSC-20140126_0000046	GR	38.1522	20.3912	KTHA	36.2566	23.0621			SS	15	6.19	316.806	516.09	273	0.05157	-0.0442	0.00023	0.00014	-0.475179	-1.05066	-0.139028	-0.0533055	-0.312498
EMSC-20140126_0000046	GR	38.1522	20.3912	MGNA	38.6561	20.7912			SS	15	6.19	65.9818	411.497	65	0.03929	0.00081	-1e-05	8e-05	1.59166	0.411168	1.91605	1.46452	0.720075
EMSC-20140126_0000046	GR	38.1522	20.3912	MNVA	36.6871	23.0373			SS	15	6.19	284.847	883.644	11	0.09264	0.03325	-0.00021	-4e-05	-0.464677	-0.84109	-0.31104	0.0118307	-0.290999
EMSC-20140126_0000046	GR	38.1522	20.3912	NOAC	37.9738	23.7177			SS	15	6.19	291.883	434.005	96	-0.02322	0.00027	5e-05	6e-05	-0.19362	-0.897807	0.350776	0.241935	-0.175324
EMSC-20140126_0000046	GR	38.1522	20.3912	PLG	40.3733	23.4444			SS	15	6.19	360.637	493.142	535	-0.05298	-0.01891	-1e-05	-1e-05	-0.685828	-1.02991	-0.270491	-0.265727	-0.536581
EMSC-20140126_0000046	GR	38.1522	20.3912	TNSA	37.5394	25.1631			SS	15	6.19	424.458	498.109	10	-0.00543	-0.03838	0	-6e-05	-0.962841	-1.24377	-0.502623	-0.673781	-0.742088
EMSC-20140126_0000046	GR	38.1522	20.3912	VLMS	37.8766	20.6628			SS	15	6.19	38.8009	533.941	435	-0.06411	-0.00189	-3e-05	5e-05	2.08428	0.849587	2.52547	1.71241	0.751107
EMSC-20140126_0000046	GR	38.1522	20.3912	YDRA	37.3495	23.4653			SS	15	6.19	284.613	693.523	86	-0.04435	0.15921	8e-05	-0.0002	-0.0516304	-0.639172	0.163013	0.410334	-0.0717453
EMSC-20140126_0000046	GR	38.1522	20.3912	CAR1	39.2534	16.2114			SS	15	6.19	382.774	419.207	628.92	0.02635	-0.18406	0.00291	0.00193	-0.21481	-1.18032	0.329307	0.118094	-0.788858
EMSC-20140126_0000046	GR	38.1522	20.3912	CELI	39.4027	16.5088			SS	15	6.19	364.101	494.642	1243.76	-0.0776	0.12593	0.00083	0.00178	-0.783762	-1.10432	-0.421401	-0.285218	-0.603766
EMSC-20140126_0000046	GR	38.1522	20.3912	JOPP	38.6068	15.8856			SS	15	6.19	395.94	488.391	504.213	0.12262	-0.20414	0.0001	0.00077	-0.468568	-1.43174	0.117768	-0.400466	-0.925594
EMSC-20140126_0000046	GR	38.1522	20.3912	PIPA	39.4851	16.8158			SS	15	6.19	343.353	465.276	416.482	0.14304	-0.1633	0.00539	-0.00247	-0.32459	-1.0997	0.0803607	-0.192261	-0.642606
EMSC-20140126_0000046	GR	38.1522	20.3912	PLAC	38.4494	16.4383			SS	15	6.19	346.491	404.99	529.022	0.08808	0.12285	0.00468	0.00079	-0.539391	-1.51963	-0.146766	-0.358988	-1.0007
EMSC-20140126_0000046	GR	38.1522	20.3912	SALB	39.8772	16.3459			SS	15	6.19	398.616	502.345	1132.22	-0.06429	-0.23787	0.00504	0.00431	-0.439151	-1.29079	0.239094	-0.442935	-0.653031
EMSC-20140126_0000046	GR	38.1522	20.3912	SERS	39.0359	16.6886			SS	15	6.19	336.426	502.336	1175.69	-0.14596	0.00591	0.00236	0.00399	-0.49186	-1.48749	0.0334704	-0.302634	-0.959738
EMSC-20140126_0000046	GR	38.1522	20.3912	T0701	39.9862	16.1161			SS	15	6.19	421.593	484.567	897.812	-0.35231	-0.39783	0.00368	0.00639	-0.675755	-1.27145	-0.213921	-0.451973	-0.721406
EMSC-20140126_0000046	GR	38.1522	20.3912	T0721	39.9369	15.9769			SS	15	6.19	429.706	431.513	539.68	0.05859	-0.0076	0.00042	0.00084	-0.3954	-0.981802	-0.0114931	0.0719744	-0.568829
EMSC-20140126_0000046	GR	38.1522	20.3912	CEL	38.2603	15.8939			SS	15	6.19	393.1	533.959	639.022	0.13038	-0.416	0.00255	-0.00228	-0.350314	-1.45195	0.0750728	-0.30538	-1.15824
EMSC-20140126_0000046	GR	38.1522	20.3912	CUC	39.9938	15.8155			SS	15	6.19	444.843	698.631	610.928	-0.41867	-0.12326	0.00455	-0.00275	-0.772921	-1.2817	-0.206846	-0.254025	-0.816783
EMSC-20140126_0000046	GR	38.1522	20.3912	TIP	39.1794	16.7583			SS	15	6.19	335.426	533.388	776.877	0.22392	0.14522	-0.00153	-0.00412	-0.882575	-1.38015	-0.502415	-0.535164	-0.698109
EMSC-20140126_0000056	GR	38.38	20.302	KBN	40.6232	20.7874	742	MASW	NF	10.16	4.64	252.884	742	904	-0.0647	0.02283	-6e-05	6e-05	-1.36127	-2.49657	-0.897949	-1.38127	-2.26376
EMSC-20140126_0000056	GR	38.38	20.302	LSK	40.1499	20.5987	818	MASW	NF	10.16	4.64	198.454	818	914	0.02412	-0.04688	-0.00031	0.00017	-0.821849	-1.8354	-0.396732	-0.661656	-1.95843
EMSC-20140126_0000056	GR	38.38	20.302	SRN	39.8789	20.0061	1512	MASW	NF	10.16	4.64	168.613	1512	78	-0.00912	-0.13807	-0.00012	-0.00011	-1.08716	-2.23123	-0.659507	-1.07625	-2.2911
EMSC-20140126_0000056	GR	38.38	20.302	DLFA	38.4784	22.4956			NF	10.16	4.64	191.39	900	511	-0.01822	-0.37187	0.00018	-0.00012	-1.2075	-2.21261	-0.726622	-1.04468	-2.17808
EMSC-20140126_0000056	GR	38.38	20.302	ITM	37.1787	21.9252			NF	10.16	4.64	195.426	844.349	512	-0.01976	-0.08096	0.00025	3e-05	-1.19069	-2.10299	-0.760929	-1.02327	-1.67801
EMSC-20140126_0000056	GR	38.38	20.302	JAN	39.6562	20.8487			NF	10.16	4.64	149.556	435.911	515	0.01206	-0.02499	3e-05	1e-05	-0.412405	-1.71793	-0.0691825	-0.776027	-1.74373
EMSC-20140126_0000056	GR	38.38	20.302	KASA	39.7463	19.9354			NF	10.16	4.64	155.185	900	41	0.09573	-0.04553	-0.00012	1e-05	-0.583838	-1.85226	-0.232987	-0.880612	-2.10974
EMSC-20140126_0000056	GR	38.38	20.302	MGNA	38.6561	20.7912			NF	10.16	4.64	52.4725	411.497	65	0.03929	0.00081	-1e-05	8e-05	0.765013	-0.703577	0.874059	-0.0712281	-1.03682
EMSC-20140126_0000056	GR	38.38	20.302	VLMS	37.8766	20.6628			NF	10.16	4.64	64.2616	533.941	435	-0.06411	-0.00189	-3e-05	5e-05	0.627972	-0.988082	0.612798	-0.113635	-1.28361
EMSC-20140126_0000085	GR	38.2385	20.4178	BERA1	40.7082	19.9455	1007	MASW	TF	21.7	5.4	277.589	1007	126	-0.03639	0.04255	0.0003	-0.00019	-0.347276	-1.48711	0.150095	-0.39129	-1.17903
EMSC-20140126_0000085	GR	38.2385	20.4178	KBN	40.6232	20.7874	742	MASW	TF	21.7	5.4	267.059	742	904	-0.0647	0.02283	-6e-05	6e-05	-0.864481	-1.69227	-0.382483	-0.54159	-1.31177
EMSC-20140126_0000085	GR	38.2385	20.4178	LSK	40.1499	20.5987	818	MASW	TF	21.7	5.4	213.109	818	914	0.02412	-0.04688	-0.00031	0.00017	-0.24978	-1.17826	0.212342	-0.0925523	-0.915483
EMSC-20140126_0000085	GR	38.2385	20.4178	SRN	39.8789	20.0061	1512	MASW	TF	21.7	5.4	185.835	1512	78	-0.00912	-0.13807	-0.00012	-0.00011	-0.35389	-1.36286	0.0807115	-0.342347	-0.983414
EMSC-20140126_0000085	GR	38.2385	20.4178	KTHA	36.2566	23.0621			TF	21.7	5.4	321.451	516.09	273	0.05157	-0.0442	0.00023	0.00014	-1.17964	-1.8066	-0.736017	-0.717905	-1.25225
EMSC-20140126_0000085	GR	38.2385	20.4178	ALNA	39.148	23.8667			TF	21.7	5.4	315.922	604.69	8	0.03835	-0.03635	-5e-05	-6e-05	-1.10838	-1.77742	-0.897255	-0.730974	-1.19982
EMSC-20140126_0000085	GR	38.2385	20.4178	DLFA	38.4784	22.4956			TF	21.7	5.4	183.121	900	511	-0.01822	-0.37187	0.00018	-0.00012	-0.64567	-1.42474	-0.270218	-0.316157	-0.891394
EMSC-20140126_0000085	GR	38.2385	20.4178	ITM	37.1787	21.9252			TF	21.7	5.4	177.397	844.349	512	-0.01976	-0.08096	0.00025	3e-05	-0.469844	-1.29725	-0.109691	-0.285595	-0.76665
EMSC-20140126_0000085	GR	38.2385	20.4178	JAN	39.6562	20.8487			TF	21.7	5.4	161.981	435.911	515	0.01206	-0.02499	3e-05	1e-05	0.00851163	-1.10268	0.623744	-0.0436693	-0.772842
EMSC-20140126_0000085	GR	38.2385	20.4178	KASA	39.7463	19.9354			TF	21.7	5.4	172.762	900	41	0.09573	-0.04553	-0.00012	1e-05	0.0956624	-1.19323	0.668237	-0.0427372	-1.01153
EMSC-20140126_0000085	GR	38.2385	20.4178	KTHA	36.2566	23.0621			TF	21.7	5.4	321.451	516.09	273	0.05157	-0.0442	0.00023	0.00014	-1.18855	-1.81551	-0.744918	-0.72681	-1.26116
EMSC-20140126_0000085	GR	38.2385	20.4178	MGNA	38.6561	20.7912			TF	21.7	5.4	56.683	411.497	65	0.03929	0.00081	-1e-05	8e-05	1.00692	-0.562422	1.16219	0.303139	-0.280166
EMSC-20140126_0000085	GR	38.2385	20.4178	NOAC	37.9738	23.7177			TF	21.7	5.4	290.205	434.005	96	-0.02322	0.00027	5e-05	6e-05	-0.843312	-1.52678	-0.452101	-0.442585	-0.997569
EMSC-20140126_0000085	GR	38.2385	20.4178	VLMS	37.8766	20.6628			TF	21.7	5.4	45.6042	533.941	435	-0.06411	-0.00189	-3e-05	5e-05	1.59314	0.0862054	1.77809	0.778371	-0.226023
EMSC-20140126_0000085	GR	38.2385	20.4178	YDRA	37.3495	23.4653			TF	21.7	5.4	285.424	693.523	86	-0.04435	0.15921	8e-05	-0.0002	-0.785616	-1.39033	-0.481891	-0.453561	-0.842133
EMSC-20140126_0000085	GR	38.2385	20.4178	PIPA	39.4851	16.8158			TF	21.7	5.4	341.255	465.276	416.482	0.14304	-0.1633	0.00539	-0.00247	-0.851941	-1.81785	-0.457454	-0.747402	-1.37245
EMSC-20140126_0000085	GR	38.2385	20.4178	SERS	39.0359	16.6886			TF	21.7	5.4	335.792	502.336	1175.69	-0.14596	0.00591	0.00236	0.00399	-1.05171	-1.95433	-0.64216	-0.806865	-1.67761
EMSC-20140126_0000085	GR	38.2385	20.4178	TIP	39.1794	16.7583			TF	21.7	5.4	334.293	533.388	776.877	0.22392	0.14522	-0.00153	-0.00412	-1.41038	-2.15951	-0.976695	-1.02779	-1.45796
EMSC-20140126_0000087	GR	38.19	20.42	BERA1	40.7082	19.9455	1007	MASW	SS	17	4.39	282.954	1007	126	-0.03639	0.04255	0.0003	-0.00019	-1.2714	-2.41041	-0.973946	-1.37949	-2.08562
EMSC-20140126_0000087	GR	38.19	20.42	DLFA	38.4784	22.4956			SS	17	4.39	183.854	900	511	-0.01822	-0.37187	0.00018	-0.00012	-1.46702	-2.4298	-1.09026	-1.09545	-2.2399
EMSC-20140126_0000087	GR	38.19	20.42	ITM	37.1787	21.9252			SS	17	4.39	173.747	844.349	512	-0.01976	-0.08096	0.00025	3e-05	-1.26766	-2.26214	-0.806655	-1.17514	-1.90114
EMSC-20140126_0000087	GR	38.19	20.42	JAN	39.6562	20.8487			SS	17	4.39	167.195	435.911	515	0.01206	-0.02499	3e-05	1e-05	-0.882566	-1.91117	-0.40954	-0.973052	-1.60979
EMSC-20140126_0000087	GR	38.19	20.42	KASA	39.7463	19.9354			SS	17	4.39	178.048	900	41	0.09573	-0.04553	-0.00012	1e-05	-0.988243	-2.24313	-0.559015	-1.12107	-1.93724
EMSC-20140126_0000087	GR	38.19	20.42	MGNA	38.6561	20.7912			SS	17	4.39	61.0829	411.497	65	0.03929	0.00081	-1e-05	8e-05	0.257096	-1.46757	0.0697999	-0.750956	-1.39861
EMSC-20140126_0000087	GR	38.19	20.42	VLMS	37.8766	20.6628			SS	17	4.39	40.827	533.941	435	-0.06411	-0.00189	-3e-05	5e-05	0.685968	-0.891715	0.775555	-0.132236	-1.27247
EMSC-20140126_0000089	GR	38.24	20.4	KBN	40.6232	20.7874	742	MASW	TF	18	4.3	267.079	742	904	-0.0647	0.02283	-6e-05	6e-05	-1.79919	-2.63537	-1.52831	-1.48069	-2.15637
EMSC-20140126_0000089	GR	38.24	20.4	DLFA	38.4784	22.4956			TF	18	4.3	184.63	900	511	-0.01822	-0.37187	0.00018	-0.00012	-1.18644	-2.05998	-0.886925	-0.836649	-1.9191
EMSC-20140126_0000089	GR	38.24	20.4	ITM	37.1787	21.9252			TF	18	4.3	178.68	844.349	512	-0.01976	-0.08096	0.00025	3e-05	-1.10217	-2.09528	-0.544902	-0.821477	-1.78332
EMSC-20140126_0000089	GR	38.24	20.4	JAN	39.6562	20.8487			TF	18	4.3	162.18	435.911	515	0.01206	-0.02499	3e-05	1e-05	-1.03436	-2.16854	-0.604245	-0.951357	-1.69827
EMSC-20140126_0000089	GR	38.24	20.4	KASA	39.7463	19.9354			TF	18	4.3	172.235	900	41	0.09573	-0.04553	-0.00012	1e-05	-1.09946	-2.17587	-0.584583	-1.08097	-1.97729
EMSC-20140126_0000089	GR	38.24	20.4	MGNA	38.6561	20.7912			TF	18	4.3	57.4516	411.497	65	0.03929	0.00081	-1e-05	8e-05	0.325443	-1.32279	0.108675	-0.459586	-1.19437
EMSC-20140126_0000089	GR	38.24	20.4	VLMS	37.8766	20.6628			TF	18	4.3	46.5025	533.941	435	-0.06411	-0.00189	-3e-05	5e-05	0.55738	-0.830556	0.754798	0.108282	-1.11487
EMSC-20140126_0000106	GR	38.13	20.3	KBN	40.6232	20.7874	742	MASW	TF	10	4.72	280.377	742	904	-0.0647	0.02283	-6e-05	6e-05	-1.45202	-2.37734	-1.11784	-1.27134	-1.89072
EMSC-20140126_0000106	GR	38.13	20.3	SRN	39.8789	20.0061	1512	MASW	TF	10	4.72	196.12	1512	78	-0.00912	-0.13807	-0.00012	-0.00011	-1.03615	-2.21446	-0.82565	-1.13089	-1.76881
EMSC-20140126_0000106	GR	38.13	20.3	DLFA	38.4784	22.4956			TF	10	4.72	195.458	900	511	-0.01822	-0.37187	0.00018	-0.00012	-1.20861	-2.05247	-0.826071	-0.840638	-1.67763
EMSC-20140126_0000106	GR	38.13	20.3	ITM	37.1787	21.9252			TF	10	4.72	177.926	844.349	512	-0.01976	-0.08096	0.00025	3e-05	-0.89501	-1.97893	-0.475833	-0.78026	-1.50985
EMSC-20140126_0000106	GR	38.13	20.3	JAN	39.6562	20.8487			TF	10	4.72	176.22	435.911	515	0.01206	-0.02499	3e-05	1e-05	-0.558589	-1.67825	-0.183055	-0.641713	-1.40033
EMSC-20140126_0000106	GR	38.13	20.3	KASA	39.7463	19.9354			TF	10	4.72	182.467	900	41	0.09573	-0.04553	-0.00012	1e-05	-0.759065	-1.95432	-0.311477	-0.90103	-1.6332
EMSC-20140126_0000106	GR	38.13	20.3	MGNA	38.6561	20.7912			TF	10	4.72	72.484	411.497	65	0.03929	0.00081	-1e-05	8e-05	0.799453	-0.729502	0.90653	-0.0706996	-0.899082
EMSC-20140126_0000106	GR	38.13	20.3	VLMS	37.8766	20.6628			TF	10	4.72	42.4817	533.941	435	-0.06411	-0.00189	-3e-05	5e-05	1.0122	-0.532027	1.08654	0.234849	-0.779799
EMSC-20140126_0000115	GR	38.2178	20.3412	BERA1	40.7082	19.9455	1007	MASW	TF	10.7	4.41	278.991	1007	126	-0.03639	0.04255	0.0003	-0.00019	-1.16337	-2.44627	-0.888404	-1.37025	-2.27119
EMSC-20140126_0000115	GR	38.2178	20.3412	SRN	39.8789	20.0061	1512	MASW	TF	10.7	4.41	186.959	1512	78	-0.00912	-0.13807	-0.00012	-0.00011	-1.29022	-2.40492	-0.847588	-1.46943	-2.2272
EMSC-20140126_0000115	GR	38.2178	20.3412	DLFA	38.4784	22.4956			TF	10.7	4.41	190.094	900	511	-0.01822	-0.37187	0.00018	-0.00012	-1.57767	-2.40679	-1.12496	-1.04654	-2.03249
EMSC-20140126_0000115	GR	38.2178	20.3412	ITM	37.1787	21.9252			TF	10.7	4.41	181.026	844.349	512	-0.01976	-0.08096	0.00025	3e-05	-1.2116	-2.43842	-0.837881	-1.33381	-2.11882
EMSC-20140126_0000115	GR	38.2178	20.3412	JAN	39.6562	20.8487			TF	10.7	4.41	165.852	435.911	515	0.01206	-0.02499	3e-05	1e-05	-0.842244	-2.05592	-0.477633	-1.11112	-2.13194
EMSC-20140126_0000115	GR	38.2178	20.3412	KASA	39.7463	19.9354			TF	10.7	4.41	173.54	900	41	0.09573	-0.04553	-0.00012	1e-05	-0.814499	-2.03309	-0.368032	-1.04927	-2.19615
EMSC-20140126_0000115	GR	38.2178	20.3412	MGNA	38.6561	20.7912			TF	10.7	4.41	62.5358	411.497	65	0.03929	0.00081	-1e-05	8e-05	0.582527	-1.10206	0.353985	-0.442348	-1.46155
EMSC-20140126_0000115	GR	38.2178	20.3412	VLMS	37.8766	20.6628			TF	10.7	4.41	47.2521	533.941	435	-0.06411	-0.00189	-3e-05	5e-05	1.02893	-0.602607	1.06314	-0.200673	-1.15988
EMSC-20140127_0000050	GR	38.1937	20.4803	LSK	40.1499	20.5987	818	MASW	TF	10	4.39	217.759	818	914	0.02412	-0.04688	-0.00031	0.00017	-1.28518	-2.33393	-0.838851	-1.04249	-2.05906
EMSC-20140127_0000050	GR	38.1937	20.4803	DLFA	38.4784	22.4956			TF	10	4.39	178.6	900	511	-0.01822	-0.37187	0.00018	-0.00012	-1.49803	-2.51043	-1.11367	-1.30052	-2.24016
EMSC-20140127_0000050	GR	38.1937	20.4803	ITM	37.1787	21.9252			TF	10	4.39	170.008	844.349	512	-0.01976	-0.08096	0.00025	3e-05	-1.30646	-2.41342	-0.752536	-1.31617	-1.98383
EMSC-20140127_0000050	GR	38.1937	20.4803	JAN	39.6562	20.8487			TF	10	4.39	165.712	435.911	515	0.01206	-0.02499	3e-05	1e-05	-0.855433	-2.19681	-0.525785	-1.20758	-1.9527
EMSC-20140127_0000050	GR	38.1937	20.4803	KASA	39.7463	19.9354			TF	10	4.39	178.949	900	41	0.09573	-0.04553	-0.00012	1e-05	-0.898786	-2.23255	-0.424984	-1.38665	-2.20434
EMSC-20140127_0000050	GR	38.1937	20.4803	MGNA	38.6561	20.7912			TF	10	4.39	58.1077	411.497	65	0.03929	0.00081	-1e-05	8e-05	0.513528	-1.10433	0.462007	-0.385624	-1.4307
EMSC-20140127_0000050	GR	38.1937	20.4803	VLMS	37.8766	20.6628			TF	10	4.39	38.7159	533.941	435	-0.06411	-0.00189	-3e-05	5e-05	0.740619	-0.773923	0.856253	-0.349746	-1.23633
EMSC-20140127_0000080	GR	38.2541	20.369	SRN	39.8789	20.0061	1512	MASW	SS	12.15	4.57	183.365	1512	78	-0.00912	-0.13807	-0.00012	-0.00011	-1.53418	-2.37654	-1.08224	-1.4269	-1.6633
EMSC-20140127_0000080	GR	38.2541	20.369	DLFA	38.4784	22.4956			SS	12.15	4.57	187.072	900	511	-0.01822	-0.37187	0.00018	-0.00012	-1.40981	-2.36257	-1.0076	-1.07154	-2.01291
EMSC-20140127_0000080	GR	38.2541	20.369	ITM	37.1787	21.9252			SS	12.15	4.57	181.754	844.349	512	-0.01976	-0.08096	0.00025	3e-05	-1.49222	-2.27298	-1.08164	-1.28839	-1.67425
EMSC-20140127_0000080	GR	38.2541	20.369	JAN	39.6562	20.8487			SS	12.15	4.57	161.326	435.911	515	0.01206	-0.02499	3e-05	1e-05	-1.00173	-2.04536	-0.611832	-0.848426	-1.50524
EMSC-20140127_0000080	GR	38.2541	20.369	KASA	39.7463	19.9354			SS	12.15	4.57	170.1	900	41	0.09573	-0.04553	-0.00012	1e-05	-1.03466	-2.16039	-0.520808	-1.06157	-1.71027
EMSC-20140127_0000080	GR	38.2541	20.369	MGNA	38.6561	20.7912			SS	12.15	4.57	57.8707	411.497	65	0.03929	0.00081	-1e-05	8e-05	0.388745	-1.19379	0.382737	-0.300196	-1.13415
EMSC-20140127_0000080	GR	38.2541	20.369	VLMS	37.8766	20.6628			SS	12.15	4.57	49.2322	533.941	435	-0.06411	-0.00189	-3e-05	5e-05	0.428013	-1.14954	0.406799	-0.283297	-0.573232
EMSC-20140127_0000097	GR	38.4237	20.4042	SRN	39.8789	20.0061	1512	MASW	SS	16.83	4.45	165.412	1512	78	-0.00912	-0.13807	-0.00012	-0.00011	-1.35079	-2.43745	-1.02764	-1.18541	-2.14325
EMSC-20140127_0000097	GR	38.4237	20.4042	DLFA	38.4784	22.4956			SS	16.83	4.45	182.222	900	511	-0.01822	-0.37187	0.00018	-0.00012	-1.53271	-2.42605	-1.36742	-1.26405	-2.09521
EMSC-20140127_0000097	GR	38.4237	20.4042	ITM	37.1787	21.9252			SS	16.83	4.45	192.408	844.349	512	-0.01976	-0.08096	0.00025	3e-05	-1.42544	-2.29026	-0.961851	-1.2818	-1.78
EMSC-20140127_0000097	GR	38.4237	20.4042	JAN	39.6562	20.8487			SS	16.83	4.45	142.319	435.911	515	0.01206	-0.02499	3e-05	1e-05	-0.887369	-1.98939	-0.453997	-0.852678	-1.68988
EMSC-20140127_0000097	GR	38.4237	20.4042	KASA	39.7463	19.9354			SS	16.83	4.45	152.528	900	41	0.09573	-0.04553	-0.00012	1e-05	-0.933355	-2.1387	-0.419106	-1.10594	-2.01235
EMSC-20140127_0000097	GR	38.4237	20.4042	MGNA	38.6561	20.7912			SS	16.83	4.45	42.4293	411.497	65	0.03929	0.00081	-1e-05	8e-05	0.489959	-1.01996	0.656191	-0.355014	-1.3372
EMSC-20140127_0000097	GR	38.4237	20.4042	VLMS	37.8766	20.6628			SS	16.83	4.45	64.9037	533.941	435	-0.06411	-0.00189	-3e-05	5e-05	0.5172	-1.03713	0.623382	-0.322483	-1.35416
EMSC-20140128_0000013	GR	38.2213	20.3842	BERA1	40.7082	19.9455	1007	MASW	TF	10	4.28	279.078	1007	126	-0.03639	0.04255	0.0003	-0.00019	-1.10286	-2.27152	-0.760422	-1.35823	-2.23744
EMSC-20140128_0000013	GR	38.2213	20.3842	KBN	40.6232	20.7874	742	MASW	TF	10	4.28	269.314	742	904	-0.0647	0.02283	-6e-05	6e-05	-1.50997	-2.56943	-1.20896	-1.38153	-2.24104
EMSC-20140128_0000013	GR	38.2213	20.3842	LSK	40.1499	20.5987	818	MASW	TF	10	4.28	215.246	818	914	0.02412	-0.04688	-0.00031	0.00017	-1.04452	-2.10496	-0.601438	-0.85399	-1.97323
EMSC-20140128_0000013	GR	38.2213	20.3842	SRN	39.8789	20.0061	1512	MASW	TF	10	4.28	187.186	1512	78	-0.00912	-0.13807	-0.00012	-0.00011	-1.31301	-2.45955	-0.887591	-1.4257	-2.35948
EMSC-20140128_0000013	GR	38.2213	20.3842	VLO	40.4704	19.4965	375	MASW	TF	10	4.28	261.474	375	39	-0.04404	-0.00932	1e-05	1e-05	-0.898112	-2.20637	-0.553775	-1.08171	-2.03764
EMSC-20140128_0000013	GR	38.2213	20.3842	DLFA	38.4784	22.4956			TF	10	4.28	186.325	900	511	-0.01822	-0.37187	0.00018	-0.00012	-1.36516	-2.38132	-0.961406	-1.16833	-2.19011
EMSC-20140128_0000013	GR	38.2213	20.3842	ITM	37.1787	21.9252			TF	10	4.28	178.38	844.349	512	-0.01976	-0.08096	0.00025	3e-05	-1.13756	-2.32999	-0.702484	-1.26667	-2.03212
EMSC-20140128_0000013	GR	38.2213	20.3842	JAN	39.6562	20.8487			TF	10	4.28	164.529	435.911	515	0.01206	-0.02499	3e-05	1e-05	-0.578947	-1.83606	-0.151394	-0.925875	-1.89538
EMSC-20140128_0000013	GR	38.2213	20.3842	KASA	39.7463	19.9354			TF	10	4.28	173.949	900	41	0.09573	-0.04553	-0.00012	1e-05	-0.845621	-2.12614	-0.352773	-1.05004	-2.06396
EMSC-20140128_0000013	GR	38.2213	20.3842	MGNA	38.6561	20.7912			TF	10	4.28	59.9446	411.497	65	0.03929	0.00081	-1e-05	8e-05	0.122779	-1.36863	0.243693	-0.773753	-1.63689
EMSC-20140128_0000013	GR	38.2213	20.3842	VLMS	37.8766	20.6628			TF	10	4.28	45.4367	533.941	435	-0.06411	-0.00189	-3e-05	5e-05	0.828495	-0.518911	1.16505	0.232569	-0.9468
EMSC-20140128_0000062	GR	38.2518	20.44	SRN	39.8789	20.0061	1512	MASW	SS	10	3.9	184.762	1512	78	-0.00912	-0.13807	-0.00012	-0.00011	-1.41285	-2.63715	-1.12744	-1.7411	-2.59856
EMSC-20140128_0000062	GR	38.2518	20.44	DLFA	38.4784	22.4956			SS	10	3.9	180.978	900	511	-0.01822	-0.37187	0.00018	-0.00012	-1.52968	-2.69323	-1.13256	-1.54736	-2.7242
EMSC-20140128_0000062	GR	38.2518	20.44	ITM	37.1787	21.9252			SS	10	3.9	176.927	844.349	512	-0.01976	-0.08096	0.00025	3e-05	-1.24437	-2.60979	-1.02074	-1.53259	-2.35401
EMSC-20140128_0000062	GR	38.2518	20.44	JAN	39.6562	20.8487			SS	10	3.9	160.107	435.911	515	0.01206	-0.02499	3e-05	1e-05	-1.05574	-2.34307	-0.639976	-1.3919	-2.47162
EMSC-20140128_0000062	GR	38.2518	20.44	KASA	39.7463	19.9354			SS	10	3.9	171.803	900	41	0.09573	-0.04553	-0.00012	1e-05	-0.925355	-2.31684	-0.339296	-1.43424	-2.49651
EMSC-20140128_0000062	GR	38.2518	20.44	MGNA	38.6561	20.7912			SS	10	3.9	54.366	411.497	65	0.03929	0.00081	-1e-05	8e-05	0.326045	-1.38038	0.231203	-0.873866	-1.839
EMSC-20140128_0000062	GR	38.2518	20.44	VLMS	37.8766	20.6628			SS	10	3.9	46.0572	533.941	435	-0.06411	-0.00189	-3e-05	5e-05	0.485412	-1.05043	0.644601	-0.355946	-1.4619
EMSC-20140128_0000087	GR	38.4092	20.4908	LSK	40.1499	20.5987	818	MASW	NF	5.7	4.4	193.78	818	914	0.02412	-0.04688	-0.00031	0.00017	-1.09389	-2.03734	-0.761496	-0.769824	-1.80471
EMSC-20140128_0000087	GR	38.4092	20.4908	SRN	39.8789	20.0061	1512	MASW	NF	5.7	4.4	168.683	1512	78	-0.00912	-0.13807	-0.00012	-0.00011	-1.33203	-2.34933	-0.813948	-1.31492	-2.10861
EMSC-20140128_0000087	GR	38.4092	20.4908	DLFA	38.4784	22.4956			NF	5.7	4.4	174.766	900	511	-0.01822	-0.37187	0.00018	-0.00012	-1.39855	-2.4237	-1.0277	-1.2414	-2.05096
EMSC-20140128_0000087	GR	38.4092	20.4908	ITM	37.1787	21.9252			NF	5.7	4.4	186.023	844.349	512	-0.01976	-0.08096	0.00025	3e-05	-1.25228	-2.21829	-0.859206	-1.12119	-1.71258
EMSC-20140128_0000087	GR	38.4092	20.4908	JAN	39.6562	20.8487			NF	5.7	4.4	142.06	435.911	515	0.01206	-0.02499	3e-05	1e-05	-0.772389	-1.95353	-0.199134	-0.744565	-1.7771
EMSC-20140128_0000087	GR	38.4092	20.4908	KASA	39.7463	19.9354			NF	5.7	4.4	156.213	900	41	0.09573	-0.04553	-0.00012	1e-05	-0.900528	-2.12734	-0.411594	-1.10899	-1.9838
EMSC-20140128_0000087	GR	38.4092	20.4908	MGNA	38.6561	20.7912			NF	5.7	4.4	37.8952	411.497	65	0.03929	0.00081	-1e-05	8e-05	0.599552	-1.0094	0.506159	-0.325744	-0.957127
EMSC-20140128_0000087	GR	38.4092	20.4908	VLMS	37.8766	20.6628			NF	5.7	4.4	61.1047	533.941	435	-0.06411	-0.00189	-3e-05	5e-05	0.403273	-1.11973	0.681436	-0.245279	-1.1162
EMSC-20140128_0000097	GR	38.4281	20.4578	KASA	39.7463	19.9354			NF	12.4501	4	153.351	900	41	0.09573	-0.04553	-0.00012	1e-05	-1.42812	-2.39511	-1.06346	-1.26463	-2.10855
EMSC-20140128_0000097	GR	38.4281	20.4578	MGNA	38.6561	20.7912			NF	12.4501	4	38.511	411.497	65	0.03929	0.00081	-1e-05	8e-05	0.00377714	-1.47803	0.00352275	-0.757132	-1.16385
EMSC-20140128_0000097	GR	38.4281	20.4578	VLMS	37.8766	20.6628			NF	12.4501	4	63.8921	533.941	435	-0.06411	-0.00189	-3e-05	5e-05	-0.0124065	-1.48465	0.267599	-0.632559	-1.2744
EMSC-20140128_0000115	GR	38.4226	20.3458	KBN	40.6232	20.7874	742	MASW	SS	5	4.51	247.609	742	904	-0.0647	0.02283	-6e-05	6e-05	-1.73986	-2.58997	-1.3901	-1.31804	-2.14209
EMSC-20140128_0000115	GR	38.4226	20.3458	LSK	40.1499	20.5987	818	MASW	SS	5	4.51	193.296	818	914	0.02412	-0.04688	-0.00031	0.00017	-1.23393	-2.29369	-0.903295	-1.03589	-2.22258
EMSC-20140128_0000115	GR	38.4226	20.3458	SRN	39.8789	20.0061	1512	MASW	SS	5	4.51	164.561	1512	78	-0.00912	-0.13807	-0.00012	-0.00011	-1.55719	-2.57697	-1.09334	-1.50933	-2.18448
EMSC-20140128_0000115	GR	38.4226	20.3458	DLFA	38.4784	22.4956			SS	5	4.51	187.31	900	511	-0.01822	-0.37187	0.00018	-0.00012	-1.32236	-2.27453	-0.958268	-1.31395	-2.04956
EMSC-20140128_0000115	GR	38.4226	20.3458	ITM	37.1787	21.9252			SS	5	4.51	195.92	844.349	512	-0.01976	-0.08096	0.00025	3e-05	-1.18468	-2.15475	-0.668225	-1.04767	-1.62077
EMSC-20140128_0000115	GR	38.4226	20.3458	JAN	39.6562	20.8487			SS	5	4.51	143.878	435.911	515	0.01206	-0.02499	3e-05	1e-05	-0.904669	-1.98876	-0.41328	-1.18605	-1.93086
EMSC-20140128_0000115	GR	38.4226	20.3458	KASA	39.7463	19.9354			SS	5	4.51	151.388	900	41	0.09573	-0.04553	-0.00012	1e-05	-1.01294	-2.22594	-0.444249	-1.36572	-1.97437
EMSC-20140128_0000115	GR	38.4226	20.3458	MGNA	38.6561	20.7912			SS	5	4.51	46.6293	411.497	65	0.03929	0.00081	-1e-05	8e-05	0.658806	-0.914481	0.618279	-0.331034	-0.911605
EMSC-20140128_0000115	GR	38.4226	20.3458	VLMS	37.8766	20.6628			SS	5	4.51	66.7435	533.941	435	-0.06411	-0.00189	-3e-05	5e-05	0.525691	-0.997032	0.735068	-0.280776	-1.06062
EMSC-20140130_0000037	GR	38.3812	20.4949	KBN	40.6232	20.7874	742	MASW	SS	5	4.73	250.559	742	904	-0.0647	0.02283	-6e-05	6e-05	-1.64196	-2.37189	-1.38447	-1.29275	-1.85668
EMSC-20140130_0000037	GR	38.3812	20.4949	LSK	40.1499	20.5987	818	MASW	SS	5	4.73	196.873	818	914	0.02412	-0.04688	-0.00031	0.00017	-1.05918	-1.89203	-0.751789	-0.632114	-1.40316
EMSC-20140130_0000037	GR	38.3812	20.4949	DLFA	38.4784	22.4956			SS	5	4.73	174.608	900	511	-0.01822	-0.37187	0.00018	-0.00012	-1.15251	-2.05913	-0.742012	-0.861845	-1.76904
EMSC-20140130_0000037	GR	38.3812	20.4949	ITM	37.1787	21.9252			SS	5	4.73	183.515	844.349	512	-0.01976	-0.08096	0.00025	3e-05	-0.953787	-1.77851	-0.604733	-0.604175	-1.36026
EMSC-20140130_0000037	GR	38.3812	20.4949	JAN	39.6562	20.8487			SS	5	4.73	145.027	435.911	515	0.01206	-0.02499	3e-05	1e-05	-0.726549	-1.77175	-0.310369	-0.610908	-1.49838
EMSC-20140130_0000037	GR	38.3812	20.4949	KASA	39.7463	19.9354			SS	5	4.73	159.289	900	41	0.09573	-0.04553	-0.00012	1e-05	-0.897627	-2.00056	-0.423969	-1.00662	-1.57559
EMSC-20140130_0000037	GR	38.3812	20.4949	MGNA	38.6561	20.7912			SS	5	4.73	39.9802	411.497	65	0.03929	0.00081	-1e-05	8e-05	0.731999	-0.716405	0.728894	-0.0187617	-0.578251
EMSC-20140130_0000037	GR	38.3812	20.4949	VLMS	37.8766	20.6628			SS	5	4.73	58.001	533.941	435	-0.06411	-0.00189	-3e-05	5e-05	0.560943	-0.937197	0.56929	0.23256	-0.654845
EMSC-20140131_0000005	GR	38.421	20.4843	KBN	40.6232	20.7874	742	MASW	SS	12.4	4.44	246.249	742	904	-0.0647	0.02283	-6e-05	6e-05	-1.65529	-2.45914	-1.33666	-1.3604	-2.05397
EMSC-20140131_0000005	GR	38.421	20.4843	DLFA	38.4784	22.4956			SS	12.4	4.44	175.265	900	511	-0.01822	-0.37187	0.00018	-0.00012	-1.19034	-2.17812	-0.836255	-0.943998	-1.9378
EMSC-20140131_0000005	GR	38.421	20.4843	ITM	37.1787	21.9252			SS	12.4	4.44	187.369	844.349	512	-0.01976	-0.08096	0.00025	3e-05	-1.08684	-2.0233	-0.605069	-1.01212	-1.57639
EMSC-20140131_0000005	GR	38.421	20.4843	JAN	39.6562	20.8487			SS	12.4	4.44	140.904	435.911	515	0.01206	-0.02499	3e-05	1e-05	-0.846891	-1.85271	-0.509493	-0.73648	-1.58191
EMSC-20140131_0000005	GR	38.421	20.4843	KASA	39.7463	19.9354			SS	12.4	4.44	154.791	900	41	0.09573	-0.04553	-0.00012	1e-05	-0.856169	-2.1445	-0.455381	-1.19665	-1.91187
EMSC-20140131_0000005	GR	38.421	20.4843	MGNA	38.6561	20.7912			SS	12.4	4.44	37.3562	411.497	65	0.03929	0.00081	-1e-05	8e-05	0.948089	-0.702659	0.623167	0.0230822	-1.04631
EMSC-20140131_0000005	GR	38.421	20.4843	VLMS	37.8766	20.6628			SS	12.4	4.44	62.5164	533.941	435	-0.06411	-0.00189	-3e-05	5e-05	0.509781	-0.932322	0.628121	0.0339222	-1.08092
EMSC-20140131_0000021	GR	38.424	20.455	KBN	40.6232	20.7874	742	MASW	SS	7.3	4.55	246.196	742	904	-0.0647	0.02283	-6e-05	6e-05	-1.54462	-2.36871	-1.19379	-1.245	-1.99111
EMSC-20140131_0000021	GR	38.424	20.455	SRN	39.8789	20.0061	1512	MASW	SS	7.3	4.55	166.343	1512	78	-0.00912	-0.13807	-0.00012	-0.00011	-1.16373	-2.16491	-0.840621	-1.02378	-1.84541
EMSC-20140131_0000021	GR	38.424	20.455	DLFA	38.4784	22.4956			SS	7.3	4.55	177.799	900	511	-0.01822	-0.37187	0.00018	-0.00012	-1.33448	-2.27087	-0.916182	-1.01011	-1.97337
EMSC-20140131_0000021	GR	38.424	20.455	ITM	37.1787	21.9252			SS	7.3	4.55	189.36	844.349	512	-0.01976	-0.08096	0.00025	3e-05	-1.17685	-2.29708	-0.723101	-1.22252	-1.71247
EMSC-20140131_0000021	GR	38.424	20.455	JAN	39.6562	20.8487			SS	7.3	4.55	141.166	435.911	515	0.01206	-0.02499	3e-05	1e-05	-0.630751	-1.79892	-0.162454	-0.702295	-1.4877
EMSC-20140131_0000021	GR	38.424	20.455	KASA	39.7463	19.9354			SS	7.3	4.55	153.717	900	41	0.09573	-0.04553	-0.00012	1e-05	-0.843236	-2.04972	-0.319536	-0.928075	-1.75345
EMSC-20140131_0000021	GR	38.424	20.455	MGNA	38.6561	20.7912			SS	7.3	4.55	38.9954	411.497	65	0.03929	0.00081	-1e-05	8e-05	0.745786	-0.830986	0.74747	-0.370465	-1.0687
EMSC-20140131_0000021	GR	38.424	20.455	VLMS	37.8766	20.6628			SS	7.3	4.55	63.5244	533.941	435	-0.06411	-0.00189	-3e-05	5e-05	0.479389	-1.03699	0.687415	-0.264697	-1.26665
EMSC-20140201_0000036	GR	38.7073	22.756	ALNA	39.148	23.8667			NF	0.7	4.81	107.854	604.69	8	0.03835	-0.03635	-5e-05	-6e-05	-0.475966	-1.46083	-0.215063	-0.221747	-1.21941
EMSC-20140201_0000036	GR	38.7073	22.756	DLFA	38.4784	22.4956			NF	0.7	4.81	34.0588	900	511	-0.01822	-0.37187	0.00018	-0.00012	0.936237	-0.355594	1.34035	0.505818	-0.479301
EMSC-20140201_0000036	GR	38.7073	22.756	ITM	37.1787	21.9252			NF	0.7	4.81	184.923	844.349	512	-0.01976	-0.08096	0.00025	3e-05	-1.14768	-1.91645	-0.783673	-0.88904	-1.43073
EMSC-20140201_0000036	GR	38.7073	22.756	JAN	39.6562	20.8487			NF	0.7	4.81	195.33	435.911	515	0.01206	-0.02499	3e-05	1e-05	-1.17383	-2.10924	-0.723844	-0.838489	-1.65625
EMSC-20140201_0000036	GR	38.7073	22.756	MGNA	38.6561	20.7912			NF	0.7	4.81	170.644	411.497	65	0.03929	0.00081	-1e-05	8e-05	-1.16497	-2.07816	-0.693473	-0.980114	-1.64713
EMSC-20140201_0000036	GR	38.7073	22.756	NOAC	37.9738	23.7177			NF	0.7	4.81	116.986	434.005	96	-0.02322	0.00027	5e-05	6e-05	-0.0856719	-1.21424	0.420558	-0.182678	-0.837463
EMSC-20140201_0000036	GR	38.7073	22.756	PLG	40.3733	23.4444			NF	0.7	4.81	194.425	493.142	535	-0.05298	-0.01891	-1e-05	-1e-05	-1.3778	-2.41246	-0.996176	-1.39636	-1.86508
EMSC-20140201_0000036	GR	38.7073	22.756	VLMS	37.8766	20.6628			NF	0.7	4.81	204.694	533.941	435	-0.06411	-0.00189	-3e-05	5e-05	-0.909751	-1.97451	-0.336917	-0.724921	-1.73808
EMSC-20140201_0000036	GR	38.7073	22.756	YDRA	37.3495	23.4653			NF	0.7	4.81	163.264	693.523	86	-0.04435	0.15921	8e-05	-0.0002	-0.759654	-1.72689	-0.396244	-0.501223	-1.37906
EMSC-20140201_0000085	GR	38.17	20.37	DLFA	38.4784	22.4956			SS	11	4.96	188.567	900	511	-0.01822	-0.37187	0.00018	-0.00012	-1.22556	-2.04324	-0.894842	-1.06973	-1.49404
EMSC-20140201_0000085	GR	38.17	20.37	ITM	37.1787	21.9252			SS	11	4.96	175.735	844.349	512	-0.01976	-0.08096	0.00025	3e-05	-0.92521	-1.82211	-0.537923	-0.742014	-1.21179
EMSC-20140201_0000085	GR	38.17	20.37	JAN	39.6562	20.8487			SS	11	4.96	170.365	435.911	515	0.01206	-0.02499	3e-05	1e-05	-0.890383	-1.88636	-0.342694	-0.79687	-1.29493
EMSC-20140201_0000085	GR	38.17	20.37	KASA	39.7463	19.9354			SS	11	4.96	179.256	900	41	0.09573	-0.04553	-0.00012	1e-05	-0.876759	-1.9548	-0.400804	-1.00362	-1.45925
EMSC-20140201_0000085	GR	38.17	20.37	MGNA	38.6561	20.7912			SS	11	4.96	65.3267	411.497	65	0.03929	0.00081	-1e-05	8e-05	0.503433	-0.932201	0.879233	-0.353312	-0.792438
EMSC-20140201_0000085	GR	38.17	20.37	VLMS	37.8766	20.6628			SS	11	4.96	41.5021	533.941	435	-0.06411	-0.00189	-3e-05	5e-05	0.818244	-0.672249	0.953823	0.208633	-0.208174
EMSC-20140203_0000008	GR	38.2637	20.3897	BERA1	40.7082	19.9455	1007	MASW	TF	5	6	274.471	1007	126	-0.03639	0.04255	0.0003	-0.00019	-0.138095	-0.840274	0.113095	0.132946	-0.273386
EMSC-20140203_0000008	GR	38.2637	20.3897	KBN	40.6232	20.7874	742	MASW	TF	5	6	264.577	742	904	-0.0647	0.02283	-6e-05	6e-05	-0.477308	-0.726405	-0.166358	-0.036984	-0.346669
EMSC-20140203_0000008	GR	38.2637	20.3897	KKS	42.0756	20.4113	745	MASW	TF	5	6	423.868	745	319	-0.02773	0.00257	-3e-05	3e-05	-0.771809	-1.09194	-0.413957	-0.476108	-0.575586
EMSC-20140203_0000008	GR	38.2637	20.3897	LSK	40.1499	20.5987	818	MASW	TF	5	6	210.507	818	914	0.02412	-0.04688	-0.00031	0.00017	0.0363116	-0.567885	0.286749	0.399161	-0.114766
EMSC-20140203_0000008	GR	38.2637	20.3897	SDA	42.0505	19.5022	1118	MASW	TF	5	6	427.767	1118	35	-0.0029	0.00567	5e-05	4e-05	-0.913356	-1.26972	-0.489191	-0.678672	-0.75355
EMSC-20140203_0000008	GR	38.2637	20.3897	SRN	39.8789	20.0061	1512	MASW	TF	5	6	182.629	1512	78	-0.00912	-0.13807	-0.00012	-0.00011	-0.184294	-0.835196	0.105223	0.127054	-0.206907
EMSC-20140203_0000008	GR	38.2637	20.3897	VLO	40.4704	19.4965	375	MASW	TF	5	6	257.103	375	39	-0.04404	-0.00932	1e-05	1e-05	-0.0096395	-0.466141	0.302451	0.301314	0.169767
EMSC-20140203_0000008	GR	38.2637	20.3897	KTHA	36.2566	23.0621			TF	5	6	325.153	516.09	273	0.05157	-0.0442	0.00023	0.00014	-0.322246	-0.58238	-0.0905257	0.139619	-0.0807723
EMSC-20140203_0000008	GR	38.2637	20.3897	ALNA	39.148	23.8667			TF	5	6	317.303	604.69	8	0.03835	-0.03635	-5e-05	-6e-05	-0.515135	-0.816474	-0.321244	-0.106812	-0.290846
EMSC-20140203_0000008	GR	38.2637	20.3897	ANKY	35.867	23.3012			TF	5	6	371.11	619.572	100	-0.0098	0.05556	-0.00012	-3e-05	-0.50628	-0.670539	-0.310018	-0.0832103	-0.32252
EMSC-20140203_0000008	GR	38.2637	20.3897	DLFA	38.4784	22.4956			TF	5	6	185.131	900	511	-0.01822	-0.37187	0.00018	-0.00012	0.0919134	-0.506023	0.367414	0.33816	0.0439885
EMSC-20140203_0000008	GR	38.2637	20.3897	ITM	37.1787	21.9252			TF	5	6	181.089	844.349	512	-0.01976	-0.08096	0.00025	3e-05	0.194728	-0.402338	0.551393	0.462782	0.135376
EMSC-20140203_0000008	GR	38.2637	20.3897	JAN	39.6562	20.8487			TF	5	6	159.84	435.911	515	0.01206	-0.02499	3e-05	1e-05	0.340179	-0.510728	0.723104	0.45722	-0.074817
EMSC-20140203_0000008	GR	38.2637	20.3897	KASA	39.7463	19.9354			TF	5	6	169.464	900	41	0.09573	-0.04553	-0.00012	1e-05	0.234	-0.697447	0.727241	0.202401	-0.135343
EMSC-20140203_0000008	GR	38.2637	20.3897	KTHA	36.2566	23.0621			TF	5	6	325.153	516.09	273	0.05157	-0.0442	0.00023	0.00014	-0.330962	-0.592134	-0.0993865	0.130797	-0.0897531
EMSC-20140203_0000008	GR	38.2637	20.3897	MGNA	38.6561	20.7912			TF	5	6	55.9044	411.497	65	0.03929	0.00081	-1e-05	8e-05	1.42163	0.0879148	1.682	0.954534	0.398824
EMSC-20140203_0000008	GR	38.2637	20.3897	MNVA	36.6871	23.0373			TF	5	6	292.079	883.644	11	0.09264	0.03325	-0.00021	-4e-05	-0.402291	-0.598764	-0.358643	-0.0441949	-0.0908208
EMSC-20140203_0000008	GR	38.2637	20.3897	NOAC	37.9738	23.7177			TF	5	6	292.895	434.005	96	-0.02322	0.00027	5e-05	6e-05	-0.207094	-0.517653	0.0633122	0.193601	-0.00896067
EMSC-20140203_0000008	GR	38.2637	20.3897	PLG	40.3733	23.4444			TF	5	6	352.206	493.142	535	-0.05298	-0.01891	-1e-05	-1e-05	-0.87954	-1.23554	-0.460385	-0.619644	-0.805166
EMSC-20140203_0000008	GR	38.2637	20.3897	TNSA	37.5394	25.1631			TF	5	6	426.44	498.109	10	-0.00543	-0.03838	0	-6e-05	-0.812337	-0.994002	-0.631021	-0.665658	-0.375123
EMSC-20140203_0000008	GR	38.2637	20.3897	VLMS	37.8766	20.6628			TF	5	6	49.2397	533.941	435	-0.06411	-0.00189	-3e-05	5e-05	1.71902	0.439752	2.09589	1.32809	1.06809
EMSC-20140203_0000008	GR	38.2637	20.3897	YDRA	37.3495	23.4653			TF	5	6	288.673	693.523	86	-0.04435	0.15921	8e-05	-0.0002	0.0339368	-0.302584	0.175741	0.338444	0.293729
EMSC-20140203_0000008	GR	38.2637	20.3897	CAR1	39.2534	16.2114			TF	5	6	378.598	419.207	628.92	0.02635	-0.18406	0.00291	0.00193	-0.321908	-1.23172	-0.0274665	0.133852	-0.890531
EMSC-20140203_0000008	GR	38.2637	20.3897	JOPP	38.6068	15.8856			TF	5	6	394.118	488.391	504.213	0.12262	-0.20414	0.0001	0.00077	-0.600376	-1.37832	-0.35689	-0.1361	-0.688517
EMSC-20140203_0000008	GR	38.2637	20.3897	PIPA	39.4851	16.8158			TF	5	6	337.848	465.276	416.482	0.14304	-0.1633	0.00539	-0.00247	-0.570426	-1.11881	-0.187292	-0.356316	-0.647448
EMSC-20140203_0000008	GR	38.2637	20.3897	PLAC	38.4494	16.4383			TF	5	6	345.134	404.99	529.022	0.08808	0.12285	0.00468	0.00079	-0.70549	-1.57322	-0.357072	-0.476357	-0.815471
EMSC-20140203_0000008	GR	38.2637	20.3897	SALB	39.8772	16.3459			TF	5	6	392.444	502.345	1132.22	-0.06429	-0.23787	0.00504	0.00431	-0.765364	-1.19732	-0.203401	-0.59518	-0.679072
EMSC-20140203_0000008	GR	38.2637	20.3897	SIRI	40.1821	15.8675			TF	5	6	444.049	429.4	1082.68	0.08837	0.02868	-0.00097	0.00514	-0.822532	-1.17899	-0.249895	-0.557461	-0.697822
EMSC-20140203_0000008	GR	38.2637	20.3897	T0701	39.9862	16.1161			TF	5	6	415.369	484.567	897.812	-0.35231	-0.39783	0.00368	0.00639	-0.883916	-1.22388	-0.466028	-0.589536	-0.812296
EMSC-20140203_0000008	GR	38.2637	20.3897	T0721	39.9369	15.9769			TF	5	6	423.741	431.513	539.68	0.05859	-0.0076	0.00042	0.00084	-0.723207	-1.28504	-0.240042	-0.194305	-0.844935
EMSC-20140203_0000008	GR	38.2637	20.3897	CEL	38.2603	15.8939			TF	5	6	392.485	533.959	639.022	0.13038	-0.416	0.00255	-0.00228	-0.623367	-1.39145	-0.168717	-0.188645	-0.814547
EMSC-20140203_0000008	GR	38.2637	20.3897	CUC	39.9938	15.8155			TF	5	6	438.882	698.631	610.928	-0.41867	-0.12326	0.00455	-0.00275	-0.99202	-1.32357	-0.564232	-0.613879	-0.891085
EMSC-20140203_0000008	GR	38.2637	20.3897	TIP	39.1794	16.7583			TF	5	6	331.054	533.388	776.877	0.22392	0.14522	-0.00153	-0.00412	-1.05799	-1.35108	-0.633933	-0.698363	-0.94085
EMSC-20140204_0000103	GR	38.3113	20.3728	DLFA	38.4784	22.4956			TF	15.8072	4.37	185.929	900	511	-0.01822	-0.37187	0.00018	-0.00012	-1.59442	-2.52541	-1.28444	-1.15932	-2.1716
EMSC-20140204_0000103	GR	38.3113	20.3728	ITM	37.1787	21.9252			TF	15.8072	4.37	185.715	844.349	512	-0.01976	-0.08096	0.00025	3e-05	-1.36644	-2.45181	-1.03038	-1.14837	-1.939
EMSC-20140204_0000103	GR	38.3113	20.3728	JAN	39.6562	20.8487			TF	15.8072	4.37	155.096	435.911	515	0.01206	-0.02499	3e-05	1e-05	-1.10105	-2.16109	-0.851429	-1.1461	-1.98186
EMSC-20140204_0000103	GR	38.3113	20.3728	KASA	39.7463	19.9354			TF	15.8072	4.37	163.974	900	41	0.09573	-0.04553	-0.00012	1e-05	-1.05734	-2.21562	-0.603408	-0.995142	-2.05893
EMSC-20140204_0000103	GR	38.3113	20.3728	MGNA	38.6561	20.7912			TF	15.8072	4.37	52.8738	411.497	65	0.03929	0.00081	-1e-05	8e-05	0.298122	-1.46135	-0.248675	-0.76862	-1.60891
EMSC-20140204_0000103	GR	38.3113	20.3728	VLMS	37.8766	20.6628			TF	15.8072	4.37	54.5961	533.941	435	-0.06411	-0.00189	-3e-05	5e-05	0.713998	-0.876562	0.672581	-0.139746	-1.26485
EMSC-20140204_0000103	GR	38.3113	20.3728	AC01	38.1662	20.5104			TF	15.8072	4.37	20.1181	600	27	-0.0344	-0.03932	2e-05	-6e-05	1.57559	-0.0549342	1.27329	0.435384	-0.434967
EMSC-20140204_0000103	GR	38.3113	20.3728	AC02	38.1632	20.5055			TF	15.8072	4.37	20.1375	600	6	0.00616	0.00973	-0.00012	-3e-05	1.6857	0.208612	1.83539	0.803932	-0.263641
EMSC-20140204_0000103	GR	38.3113	20.3728	AC03	38.1641	20.5062			TF	15.8072	4.37	20.0911	600	6	0.00616	0.00973	-0.00012	-3e-05	1.7747	0.400833	2.22505	1.12682	-0.0483815
EMSC-20140204_0000113	GR	38.3318	21.9728	DLFA	38.4784	22.4956			NF	10.4502	4.28	48.3854	900	511	-0.01822	-0.37187	0.00018	-0.00012	-0.468045	-1.76661	-0.0449355	-0.750808	-1.60479
EMSC-20140204_0000113	GR	38.3318	21.9728	ITM	37.1787	21.9252			NF	10.4502	4.28	128.285	844.349	512	-0.01976	-0.08096	0.00025	3e-05	-1.3739	-2.5053	-0.899081	-1.37424	-2.00493
EMSC-20140204_0000113	GR	38.3318	21.9728	JAN	39.6562	20.8487			NF	10.4502	4.28	176.413	435.911	515	0.01206	-0.02499	3e-05	1e-05	-1.70271	-2.68673	-1.24303	-1.43088	-2.22315
EMSC-20140204_0000113	GR	38.3318	21.9728	MGNA	38.6561	20.7912			NF	10.4502	4.28	108.974	411.497	65	0.03929	0.00081	-1e-05	8e-05	-1.2519	-2.4986	-0.83895	-1.27544	-2.3234
EMSC-20140204_0000113	GR	38.3318	21.9728	NOAC	37.9738	23.7177			NF	10.4502	4.28	157.675	434.005	96	-0.02322	0.00027	5e-05	6e-05	-1.39952	-2.50724	-0.807109	-1.26785	-2.21889
EMSC-20140204_0000113	GR	38.3318	21.9728	VLMS	37.8766	20.6628			NF	10.4502	4.28	125.296	533.941	435	-0.06411	-0.00189	-3e-05	5e-05	-0.49783	-1.85554	0.0114192	-1.00414	-2.1837
EMSC-20140204_0000113	GR	38.3318	21.9728	AC01	38.1662	20.5104			NF	10.4502	4.28	129.023	600	27	-0.0344	-0.03932	2e-05	-6e-05	-0.950666	-2.29876	-0.4824	-1.2699	-2.35965
EMSC-20140204_0000113	GR	38.3318	21.9728	AC03	38.1641	20.5062			NF	10.4502	4.28	129.421	600	6	0.00616	0.00973	-0.00012	-3e-05	-0.16611	-1.38904	0.399528	-0.64481	-1.78719
EMSC-20140206_0000023	GR	38.7033	22.7618	ALNA	39.148	23.8667			NF	12.622	4.62	107.614	604.69	8	0.03835	-0.03635	-5e-05	-6e-05	-0.2538	-1.42494	0.125882	-0.152333	-1.40301
EMSC-20140206_0000023	GR	38.7033	22.7618	DLFA	38.4784	22.4956			NF	12.622	4.62	34.0683	900	511	-0.01822	-0.37187	0.00018	-0.00012	0.51819	-0.981881	0.794032	0.0039149	-1.05593
EMSC-20140206_0000023	GR	38.7033	22.7618	ITM	37.1787	21.9252			NF	12.622	4.62	184.716	844.349	512	-0.01976	-0.08096	0.00025	3e-05	-1.49114	-2.33288	-1.01517	-1.32047	-1.88869
EMSC-20140206_0000023	GR	38.7033	22.7618	MGNA	38.6561	20.7912			NF	12.622	4.62	171.138	411.497	65	0.03929	0.00081	-1e-05	8e-05	-1.63452	-2.64502	-1.2468	-1.39162	-2.23784
EMSC-20140206_0000023	GR	38.7033	22.7618	NOAC	37.9738	23.7177			NF	12.622	4.62	116.315	434.005	96	-0.02322	0.00027	5e-05	6e-05	0.0695222	-1.32167	0.312703	-0.253087	-1.15987
EMSC-20140206_0000023	GR	38.7033	22.7618	PLG	40.3733	23.4444			NF	12.622	4.62	194.7	493.142	535	-0.05298	-0.01891	-1e-05	-1e-05	-1.6144	-2.7645	-1.18499	-1.66806	-2.31514
EMSC-20140206_0000023	GR	38.7033	22.7618	VLMS	37.8766	20.6628			NF	12.622	4.62	204.951	533.941	435	-0.06411	-0.00189	-3e-05	5e-05	-1.25413	-2.46958	-0.768283	-1.33852	-1.91607
EMSC-20140206_0000023	GR	38.7033	22.7618	AC01	38.1662	20.5104			NF	12.622	4.62	204.985	600	27	-0.0344	-0.03932	2e-05	-6e-05	-1.2619	-2.66753	-1.17112	-1.37635	-2.3479
EMSC-20140206_0000050	GR	37.8252	21.1252	DLFA	38.4784	22.4956			SS	12.4557	4.29	140.122	900	511	-0.01822	-0.37187	0.00018	-0.00012	-1.26408	-2.38875	-0.824802	-1.11821	-2.25982
EMSC-20140206_0000050	GR	37.8252	21.1252	ITM	37.1787	21.9252			SS	12.4557	4.29	100.737	844.349	512	-0.01976	-0.08096	0.00025	3e-05	-0.398956	-1.52176	0.026419	-0.342508	-1.49308
EMSC-20140206_0000050	GR	37.8252	21.1252	JAN	39.6562	20.8487			SS	12.4557	4.29	205	435.911	515	0.01206	-0.02499	3e-05	1e-05	-1.5444	-2.51402	-1.159	-1.55512	-1.91428
EMSC-20140206_0000050	GR	37.8252	21.1252	MGNA	38.6561	20.7912			SS	12.4557	4.29	96.8838	411.497	65	0.03929	0.00081	-1e-05	8e-05	-0.0713765	-1.70119	-0.222323	-1.08342	-1.94215
EMSC-20140206_0000050	GR	37.8252	21.1252	VLMS	37.8766	20.6628			SS	12.4557	4.29	40.9957	533.941	435	-0.06411	-0.00189	-3e-05	5e-05	0.991022	-0.556314	1.21575	-0.0154015	-1.0288
EMSC-20140206_0000050	GR	37.8252	21.1252	AC01	38.1662	20.5104			SS	12.4557	4.29	65.8792	600	27	-0.0344	-0.03932	2e-05	-6e-05	-0.238957	-1.66833	0.0631571	-0.69384	-1.80944
EMSC-20140206_0000050	GR	37.8252	21.1252	AC03	38.1641	20.5062			SS	12.4557	4.29	66.0476	600	6	0.00616	0.00973	-0.00012	-3e-05	0.484154	-0.841821	1.03543	-0.0122295	-1.23862
EMSC-20140206_0000050	GR	37.8252	21.1252	AC04	38.1836	20.4874			SS	12.4557	4.29	68.6368	374.579	2	-0.00599	-0.00527	-9e-05	-1e-05	0.10155	-1.13397	0.499683	-0.264061	-1.47121
EMSC-20140206_0000050	GR	37.8252	21.1252	AC05	38.1682	20.496			SS	12.4557	4.29	67.0407	415.132	7	0.02311	0.01365	-7e-05	-4e-05	0.3166	-1.31657	0.379454	-0.484905	-1.61742
EMSC-20140206_0000072	GR	38.2	20.293	DLFA	38.4784	22.4956			TF	22	4.66	194.577	900	511	-0.01822	-0.37187	0.00018	-0.00012	-1.40894	-2.26218	-0.854618	-1.06689	-1.78459
EMSC-20140206_0000072	GR	38.2	20.293	ITM	37.1787	21.9252			TF	22	4.66	183.09	844.349	512	-0.01976	-0.08096	0.00025	3e-05	-0.998499	-2.09443	-0.516786	-1.06881	-1.5386
EMSC-20140206_0000072	GR	38.2	20.293	JAN	39.6562	20.8487			TF	22	4.66	168.902	435.911	515	0.01206	-0.02499	3e-05	1e-05	-0.925708	-2.10483	-0.597048	-1.0972	-1.75577
EMSC-20140206_0000072	GR	38.2	20.293	KASA	39.7463	19.9354			TF	22	4.66	174.695	900	41	0.09573	-0.04553	-0.00012	1e-05	-0.820855	-2.06623	-0.306867	-1.17107	-2.0064
EMSC-20140206_0000072	GR	38.2	20.293	MGNA	38.6561	20.7912			TF	22	4.66	66.7434	411.497	65	0.03929	0.00081	-1e-05	8e-05	0.610887	-1.13234	0.344907	-0.258069	-1.1219
EMSC-20140206_0000072	GR	38.2	20.293	VLMS	37.8766	20.6628			TF	22	4.66	48.3973	533.941	435	-0.06411	-0.00189	-3e-05	5e-05	1.34061	-0.146581	1.33565	0.219854	-0.704608
EMSC-20140206_0000072	GR	38.2	20.293	AC01	38.1662	20.5104			TF	22	4.66	19.3697	600	27	-0.0344	-0.03932	2e-05	-6e-05	1.85461	0.158384	1.50507	0.597748	-0.26088
EMSC-20140206_0000072	GR	38.2	20.293	AC03	38.1641	20.5062			TF	22	4.66	19.0575	600	6	0.00616	0.00973	-0.00012	-3e-05	2.18552	0.610171	2.529	1.2379	0.200889
EMSC-20140206_0000072	GR	38.2	20.293	AC04	38.1836	20.4874			TF	22	4.66	17.0868	374.579	2	-0.00599	-0.00527	-9e-05	-1e-05	1.68809	0.242923	1.84102	1.04605	-0.142428
EMSC-20140206_0000072	GR	38.2	20.293	AC05	38.1682	20.496			TF	22	4.66	18.0916	415.132	7	0.02311	0.01365	-7e-05	-4e-05	2.29857	0.746296	2.17558	1.02609	0.233004
EMSC-20140207_0000002	GR	38.3	21.71	KBN	40.6232	20.7874	742	MASW	SS	10	4.2	270.192	742	904	-0.0647	0.02283	-6e-05	6e-05	-1.75662	-2.55553	-1.2257	-1.35427	-2.10756
EMSC-20140207_0000002	GR	38.3	21.71	LSK	40.1499	20.5987	818	MASW	SS	10	4.2	226.877	818	914	0.02412	-0.04688	-0.00031	0.00017	-1.17572	-2.03451	-0.992671	-0.717985	-1.731
EMSC-20140207_0000002	GR	38.3	21.71	SRN	39.8789	20.0061	1512	MASW	SS	10	4.2	229.006	1512	78	-0.00912	-0.13807	-0.00012	-0.00011	-1.71338	-2.554	-1.34393	-1.41479	-2.07617
EMSC-20140207_0000002	GR	38.3	21.71	ALNA	39.148	23.8667			SS	10	4.2	209.506	604.69	8	0.03835	-0.03635	-5e-05	-6e-05	-1.52799	-2.4827	-1.24923	-1.29357	-2.30526
EMSC-20140207_0000002	GR	38.3	21.71	DLFA	38.4784	22.4956			SS	10	4.2	71.2869	900	511	-0.01822	-0.37187	0.00018	-0.00012	-0.527674	-1.70808	-0.192482	-0.515201	-1.80132
EMSC-20140207_0000002	GR	38.3	21.71	ITM	37.1787	21.9252			SS	10	4.2	126.109	844.349	512	-0.01976	-0.08096	0.00025	3e-05	-1.02976	-2.16138	-0.543252	-0.980984	-1.9444
EMSC-20140207_0000002	GR	38.3	21.71	JAN	39.6562	20.8487			SS	10	4.2	168.172	435.911	515	0.01206	-0.02499	3e-05	1e-05	-1.00788	-2.00099	-0.583515	-0.662121	-1.50003
EMSC-20140207_0000002	GR	38.3	21.71	KASA	39.7463	19.9354			SS	10	4.2	222.169	900	41	0.09573	-0.04553	-0.00012	1e-05	-1.39459	-2.45135	-0.915441	-1.29131	-2.01219
EMSC-20140207_0000002	GR	38.3	21.71	MGNA	38.6561	20.7912			SS	10	4.2	89.2458	411.497	65	0.03929	0.00081	-1e-05	8e-05	-0.371865	-1.7155	0.0706202	-0.608998	-1.56712
EMSC-20140207_0000002	GR	38.3	21.71	MNVA	36.6871	23.0373			SS	10	4.2	214.187	883.644	11	0.09264	0.03325	-0.00021	-4e-05	-1.75536	-2.52534	-1.38266	-1.48781	-2.07101
EMSC-20140207_0000002	GR	38.3	21.71	NOAC	37.9738	23.7177			SS	10	4.2	179.291	434.005	96	-0.02322	0.00027	5e-05	6e-05	-1.20968	-2.34825	-0.530377	-1.08376	-2.07654
EMSC-20140207_0000002	GR	38.3	21.71	VLMS	37.8766	20.6628			SS	10	4.2	103.03	533.941	435	-0.06411	-0.00189	-3e-05	5e-05	-0.0901415	-1.50194	0.207285	-0.433872	-1.47374
EMSC-20140207_0000002	GR	38.3	21.71	YDRA	37.3495	23.4653			SS	10	4.2	186.916	693.523	86	-0.04435	0.15921	8e-05	-0.0002	-1.25606	-2.23973	-0.818801	-1.07553	-2.06566
EMSC-20140207_0000002	GR	38.3	21.71	AC01	38.1662	20.5104			SS	10	4.2	105.828	600	27	-0.0344	-0.03932	2e-05	-6e-05	0.161688	-1.07648	0.751228	-0.349189	-1.47884
EMSC-20140207_0000002	GR	38.3	21.71	AC03	38.1641	20.5062			SS	10	4.2	106.225	600	6	0.00616	0.00973	-0.00012	-3e-05	0.830826	-0.346562	1.43527	0.345184	-0.768375
EMSC-20140207_0000002	GR	38.3	21.71	AC04	38.1836	20.4874			SS	10	4.2	107.554	374.579	2	-0.00599	-0.00527	-9e-05	-1e-05	0.570225	-0.5371	1.05742	0.162116	-0.926059
EMSC-20140207_0000002	GR	38.3	21.71	AC05	38.1682	20.496			SS	10	4.2	107.041	415.132	7	0.02311	0.01365	-7e-05	-4e-05	0.552007	-0.77531	1.01372	-0.0687738	-1.1466
EMSC-20140207_0000006	GR	38.3301	20.3553	LSK	40.1499	20.5987	818	MASW	TF	10.35	4.08	203.435	818	914	0.02412	-0.04688	-0.00031	0.00017	-1.4054	-2.46566	-0.903326	-1.33146	-2.34137
EMSC-20140207_0000006	GR	38.3301	20.3553	SRN	39.8789	20.0061	1512	MASW	TF	10.35	4.08	174.834	1512	78	-0.00912	-0.13807	-0.00012	-0.00011	-1.40459	-2.63776	-1.03057	-1.59167	-2.40586
EMSC-20140207_0000006	GR	38.3301	20.3553	DLFA	38.4784	22.4956			TF	10.35	4.08	187.226	900	511	-0.01822	-0.37187	0.00018	-0.00012	-1.41999	-2.56092	-1.07689	-1.35798	-2.55434
EMSC-20140207_0000006	GR	38.3301	20.3553	ITM	37.1787	21.9252			TF	10.35	4.08	188.251	844.349	512	-0.01976	-0.08096	0.00025	3e-05	-1.49965	-2.5101	-1.10939	-1.38826	-2.10419
EMSC-20140207_0000006	GR	38.3301	20.3553	JAN	39.6562	20.8487			TF	10.35	4.08	153.493	435.911	515	0.01206	-0.02499	3e-05	1e-05	-0.88564	-2.26222	-0.472978	-1.29963	-2.31778
EMSC-20140207_0000006	GR	38.3301	20.3553	KASA	39.7463	19.9354			TF	10.35	4.08	161.593	900	41	0.09573	-0.04553	-0.00012	1e-05	-0.869902	-2.24138	-0.540559	-1.35698	-2.41136
EMSC-20140207_0000006	GR	38.3301	20.3553	MGNA	38.6561	20.7912			TF	10.35	4.08	52.4653	411.497	65	0.03929	0.00081	-1e-05	8e-05	0.510426	-1.23262	0.154959	-0.795639	-1.71955
EMSC-20140207_0000006	GR	38.3301	20.3553	VLMS	37.8766	20.6628			TF	10.35	4.08	57.1585	533.941	435	-0.06411	-0.00189	-3e-05	5e-05	0.0868383	-1.39593	0.211893	-0.566997	-1.66707
EMSC-20140207_0000006	GR	38.3301	20.3553	AC01	38.1662	20.5104			TF	10.35	4.08	22.7066	600	27	-0.0344	-0.03932	2e-05	-6e-05	0.781045	-0.966105	0.469521	-0.0971462	-1.14745
EMSC-20140207_0000006	GR	38.3301	20.3553	AC03	38.1641	20.5062			TF	10.35	4.08	22.6795	600	6	0.00616	0.00973	-0.00012	-3e-05	1.01764	-0.296229	1.30035	0.559695	-0.633
EMSC-20140207_0000006	GR	38.3301	20.3553	AC04	38.1836	20.4874			TF	10.35	4.08	19.9601	374.579	2	-0.00599	-0.00527	-9e-05	-1e-05	1.03526	-0.378136	1.11129	0.25429	-0.764092
EMSC-20140207_0000006	GR	38.3301	20.3553	AC05	38.1682	20.496			TF	10.35	4.08	21.7956	415.132	7	0.02311	0.01365	-7e-05	-4e-05	1.23021	-0.467995	0.845278	0.0279129	-0.898294
EMSC-20140208_0000055	GR	38.2509	20.4197	DLFA	38.4784	22.4956			TF	13.7893	4.08	182.746	900	511	-0.01822	-0.37187	0.00018	-0.00012	-1.47445	-2.55212	-1.09619	-1.40864	-2.53727
EMSC-20140208_0000055	GR	38.2509	20.4197	ITM	37.1787	21.9252			TF	13.7893	4.08	178.183	844.349	512	-0.01976	-0.08096	0.00025	3e-05	-1.38171	-2.77323	-1.09345	-1.61544	-2.51363
EMSC-20140208_0000055	GR	38.2509	20.4197	JAN	39.6562	20.8487			TF	13.7893	4.08	160.601	435.911	515	0.01206	-0.02499	3e-05	1e-05	-1.16439	-2.36088	-0.652396	-1.18941	-2.31673
EMSC-20140208_0000055	GR	38.2509	20.4197	KASA	39.7463	19.9354			TF	13.7893	4.08	171.463	900	41	0.09573	-0.04553	-0.00012	1e-05	-1.38378	-2.61786	-0.821121	-1.66426	-2.5802
EMSC-20140208_0000055	GR	38.2509	20.4197	MGNA	38.6561	20.7912			TF	13.7893	4.08	55.4609	411.497	65	0.03929	0.00081	-1e-05	8e-05	0.368046	-1.19361	0.609773	-0.698887	-1.66642
EMSC-20140208_0000055	GR	38.2509	20.4197	VLMS	37.8766	20.6628			TF	13.7893	4.08	46.7486	533.941	435	-0.06411	-0.00189	-3e-05	5e-05	0.768369	-0.690924	1.06785	-0.147832	-1.26013
EMSC-20140208_0000055	GR	38.2509	20.4197	AC01	38.1662	20.5104			TF	13.7893	4.08	12.3087	600	27	-0.0344	-0.03932	2e-05	-6e-05	1.30891	-0.544327	0.875235	-0.214282	-0.972838
EMSC-20140208_0000055	GR	38.2509	20.4197	AC02	38.1632	20.5055			TF	13.7893	4.08	12.3004	600	6	0.00616	0.00973	-0.00012	-3e-05	1.64706	-0.0568708	1.63282	0.201258	-0.608441
EMSC-20140208_0000055	GR	38.2509	20.4197	AC03	38.1641	20.5062			TF	13.7893	4.08	12.2588	600	6	0.00616	0.00973	-0.00012	-3e-05	1.76677	0.0988793	1.94294	0.508578	-0.404738
EMSC-20140208_0000055	GR	38.2509	20.4197	AC04	38.1836	20.4874			TF	13.7893	4.08	9.53846	374.579	2	-0.00599	-0.00527	-9e-05	-1e-05	1.53418	-0.0245172	1.60256	0.557075	-0.487292
EMSC-20140208_0000055	GR	38.2509	20.4197	AC05	38.1682	20.496			TF	13.7893	4.08	11.358	415.132	7	0.02311	0.01365	-7e-05	-4e-05	2.0384	0.197973	1.46256	0.291283	-0.510799
EMSC-20140209_0000039	GR	38.1862	20.3495	KBN	40.6232	20.7874	742	MASW	TF	9	4.79	273.58	742	904	-0.0647	0.02283	-6e-05	6e-05	-1.9109	-2.52056	-1.54233	-1.62266	-1.98442
EMSC-20140209_0000039	GR	38.1862	20.3495	DLFA	38.4784	22.4956			TF	9	4.79	189.988	900	511	-0.01822	-0.37187	0.00018	-0.00012	-1.34979	-2.20215	-0.905385	-1.08958	-1.77321
EMSC-20140209_0000039	GR	38.1862	20.3495	ITM	37.1787	21.9252			TF	9	4.79	178.258	844.349	512	-0.01976	-0.08096	0.00025	3e-05	-1.00135	-1.86835	-0.552264	-0.720521	-1.24266
EMSC-20140209_0000039	GR	38.1862	20.3495	JAN	39.6562	20.8487			TF	9	4.79	169.061	435.911	515	0.01206	-0.02499	3e-05	1e-05	-1.01252	-2.14679	-0.567241	-1.13821	-1.55149
EMSC-20140209_0000039	GR	38.1862	20.3495	KASA	39.7463	19.9354			TF	9	4.79	177.128	900	41	0.09573	-0.04553	-0.00012	1e-05	-1.09959	-2.21979	-0.509289	-1.25274	-1.89944
EMSC-20140209_0000039	GR	38.1862	20.3495	MGNA	38.6561	20.7912			TF	9	4.79	64.8848	411.497	65	0.03929	0.00081	-1e-05	8e-05	0.453757	-1.14215	0.486027	-0.69224	-1.17332
EMSC-20140209_0000039	GR	38.1862	20.3495	VLMS	37.8766	20.6628			TF	9	4.79	44.0271	533.941	435	-0.06411	-0.00189	-3e-05	5e-05	0.771493	-0.496328	1.0025	0.504524	-0.49849
EMSC-20140209_0000039	GR	38.1862	20.3495	AC01	38.1662	20.5104			TF	9	4.79	14.2393	600	27	-0.0344	-0.03932	2e-05	-6e-05	1.4849	-0.0618096	1.39771	0.97563	-0.000188897
EMSC-20140209_0000039	GR	38.1862	20.3495	AC02	38.1632	20.5055			TF	9	4.79	13.8743	600	6	0.00616	0.00973	-0.00012	-3e-05	1.90895	0.46265	2.09398	1.35445	0.28552
EMSC-20140209_0000039	GR	38.1862	20.3495	AC03	38.1641	20.5062			TF	9	4.79	13.9163	600	6	0.00616	0.00973	-0.00012	-3e-05	2.07922	0.592659	2.37088	1.62646	0.405702
EMSC-20140209_0000039	GR	38.1862	20.3495	AC04	38.1836	20.4874			TF	9	4.79	12.0561	374.579	2	-0.00599	-0.00527	-9e-05	-1e-05	1.49951	0.107318	1.76019	1.1507	0.240465
EMSC-20140209_0000039	GR	38.1862	20.3495	AC05	38.1682	20.496			TF	9	4.79	12.9611	415.132	7	0.02311	0.01365	-7e-05	-4e-05	2.18008	0.485316	1.94815	1.16582	0.241632
EMSC-20140214_0000001	TR	36.702	36.0052	KHMN	37.3916	37.1574			NF	11.1679	4.5	127.812	272.353	599	-0.0127	0.00068	-1e-05	0	0.511124	-0.775422	0.895547	0.182875	-0.581722
EMSC-20140214_0000001	TR	36.702	36.0052	KRTD	36.5934	35.4157			NF	11.1679	4.5	53.9601	362.858	24	-0.00117	-0.00581	1e-05	2e-05	0.503754	-0.662821	0.905838	0.552575	-0.243135
EMSC-20140214_0000001	TR	36.702	36.0052	NIG	38.108	34.6142			NF	11.1679	4.5	198.836	665.455	2155	0.08773	-0.06392	3e-05	0.00021	-0.354117	-1.24501	-0.0070825	-0.119684	-0.961102
EMSC-20140214_0000009	GR	38.19	20.4	BERA1	40.7082	19.9455	1007	MASW	SS	10	4.83	282.712	1007	126	-0.03639	0.04255	0.0003	-0.00019	-0.813704	-1.97948	-0.477602	-0.918292	-1.7538
EMSC-20140214_0000009	GR	38.19	20.4	FIER	40.7174	19.5669	374	MASW	SS	10	4.83	289.989	374	14	0.00976	0.00824	0	-2e-05	-0.859691	-1.66694	-0.470284	-0.395156	-1.19564
EMSC-20140214_0000009	GR	38.19	20.4	KBN	40.6232	20.7874	742	MASW	SS	10	4.83	272.598	742	904	-0.0647	0.02283	-6e-05	6e-05	-1.45339	-2.13628	-1.10458	-1.10404	-1.66749
EMSC-20140214_0000009	GR	38.19	20.4	LSK	40.1499	20.5987	818	MASW	SS	10	4.83	218.603	818	914	0.02412	-0.04688	-0.00031	0.00017	-0.827056	-1.73577	-0.536607	-0.445914	-1.20465
EMSC-20140214_0000009	GR	38.19	20.4	SRN	39.8789	20.0061	1512	MASW	SS	10	4.83	190.853	1512	78	-0.00912	-0.13807	-0.00012	-0.00011	-1.0273	-2.00009	-0.6439	-0.87661	-1.48569
EMSC-20140214_0000009	GR	38.19	20.4	VLO	40.4704	19.4965	375	MASW	SS	10	4.83	265.205	375	39	-0.04404	-0.00932	1e-05	1e-05	-0.754705	-1.7962	-0.369043	-0.748028	-1.1537
EMSC-20140214_0000009	GR	38.19	20.4	DLFA	38.4784	22.4956			SS	10	4.83	185.572	900	511	-0.01822	-0.37187	0.00018	-0.00012	-1.08612	-1.94498	-0.799974	-0.596539	-1.4258
EMSC-20140214_0000009	GR	38.19	20.4	ITM	37.1787	21.9252			SS	10	4.83	175.093	844.349	512	-0.01976	-0.08096	0.00025	3e-05	-0.994339	-1.95251	-0.704828	-0.983079	-1.41794
EMSC-20140214_0000009	GR	38.19	20.4	JAN	39.6562	20.8487			SS	10	4.83	167.587	435.911	515	0.01206	-0.02499	3e-05	1e-05	-0.599117	-1.6873	-0.128044	-0.565071	-1.20878
EMSC-20140214_0000009	GR	38.19	20.4	KASA	39.7463	19.9354			SS	10	4.83	177.65	900	41	0.09573	-0.04553	-0.00012	1e-05	-0.624326	-1.77158	-0.149257	-0.656528	-1.39897
EMSC-20140214_0000009	GR	38.19	20.4	MGNA	38.6561	20.7912			SS	10	4.83	62.0228	411.497	65	0.03929	0.00081	-1e-05	8e-05	0.660127	-0.943227	0.61612	0.0113076	-0.856093
EMSC-20140214_0000009	GR	38.19	20.4	VLMS	37.8766	20.6628			SS	10	4.83	41.7663	533.941	435	-0.06411	-0.00189	-3e-05	5e-05	0.778762	-0.720664	0.792656	0.164146	-0.664832
EMSC-20140214_0000009	GR	38.19	20.4	AC01	38.1662	20.5104			SS	10	4.83	10.0063	600	27	-0.0344	-0.03932	2e-05	-6e-05	1.32401	-0.135296	1.49452	0.592285	-0.055649
EMSC-20140214_0000009	GR	38.19	20.4	AC03	38.1641	20.5062			SS	10	4.83	9.7195	600	6	0.00616	0.00973	-0.00012	-3e-05	2.13825	0.772939	2.58024	1.44619	0.369119
EMSC-20140214_0000009	GR	38.19	20.4	AC04	38.1836	20.4874			SS	10	4.83	7.67176	374.579	2	-0.00599	-0.00527	-9e-05	-1e-05	1.50884	0.261758	1.70692	1.14389	0.231178
EMSC-20140214_0000009	GR	38.19	20.4	AC05	38.1682	20.496			SS	10	4.83	8.73432	415.132	7	0.02311	0.01365	-7e-05	-4e-05	1.90033	0.341195	1.8223	0.87256	0.0972849
EMSC-20140215_0000011	GR	38.3001	20.3902	FIER	40.7174	19.5669	374	MASW	TF	25.28	4.94	277.912	374	14	0.00976	0.00824	0	-2e-05	-0.613194	-1.6088	-0.125967	-0.329482	-1.11049
EMSC-20140215_0000011	GR	38.3001	20.3902	KBN	40.6232	20.7874	742	MASW	TF	25.28	4.94	260.557	742	904	-0.0647	0.02283	-6e-05	6e-05	-1.17537	-2.07682	-0.776162	-0.748622	-1.65863
EMSC-20140215_0000011	GR	38.3001	20.3902	SRN	39.8789	20.0061	1512	MASW	TF	25.28	4.94	178.656	1512	78	-0.00912	-0.13807	-0.00012	-0.00011	-0.643747	-1.77146	-0.269328	-0.678894	-1.51667
EMSC-20140215_0000011	GR	38.3001	20.3902	DLFA	38.4784	22.4956			TF	25.28	4.94	184.564	900	511	-0.01822	-0.37187	0.00018	-0.00012	-1.10254	-1.89593	-0.816827	-0.647617	-1.32699
EMSC-20140215_0000011	GR	38.3001	20.3902	ITM	37.1787	21.9252			TF	25.28	4.94	183.754	844.349	512	-0.01976	-0.08096	0.00025	3e-05	-1.00107	-1.90669	-0.621146	-0.852868	-1.25412
EMSC-20140215_0000011	GR	38.3001	20.3902	JAN	39.6562	20.8487			TF	25.28	4.94	155.909	435.911	515	0.01206	-0.02499	3e-05	1e-05	-0.366392	-1.47734	0.0452801	-0.316951	-1.23466
EMSC-20140215_0000011	GR	38.3001	20.3902	KASA	39.7463	19.9354			TF	25.28	4.94	165.537	900	41	0.09573	-0.04553	-0.00012	1e-05	-0.173238	-1.41347	0.475562	-0.440622	-1.39384
EMSC-20140215_0000011	GR	38.3001	20.3902	MGNA	38.6561	20.7912			TF	25.28	4.94	52.7717	411.497	65	0.03929	0.00081	-1e-05	8e-05	0.593334	-0.935871	0.556872	-0.0325026	-0.732367
EMSC-20140215_0000011	GR	38.3001	20.3902	VLMS	37.8766	20.6628			TF	25.28	4.94	52.792	533.941	435	-0.06411	-0.00189	-3e-05	5e-05	1.06688	-0.354454	1.37265	0.148204	-0.734314
EMSC-20140215_0000011	GR	38.3001	20.3902	AC01	38.1662	20.5104			TF	25.28	4.94	18.2183	600	27	-0.0344	-0.03932	2e-05	-6e-05	1.81053	0.00114804	1.50011	0.700368	-0.0804485
EMSC-20140215_0000011	GR	38.3001	20.3902	AC03	38.1641	20.5062			TF	25.28	4.94	18.203	600	6	0.00616	0.00973	-0.00012	-3e-05	2.05385	0.734173	2.48573	1.42715	0.342969
EMSC-20140215_0000011	GR	38.3001	20.3902	AC04	38.1836	20.4874			TF	25.28	4.94	15.4878	374.579	2	-0.00599	-0.00527	-9e-05	-1e-05	1.73775	0.357185	1.7821	1.1994	0.241301
EMSC-20140215_0000011	GR	38.3001	20.3902	AC05	38.1682	20.496			TF	25.28	4.94	17.335	415.132	7	0.02311	0.01365	-7e-05	-4e-05	2.25004	0.441736	1.91465	1.00568	0.0882608
EMSC-20140218_0000073	TR	38.608	43.602	GNI	40.148	44.741			U	11	4.6	197.245	733.137	1556	0.00299	-0.09929	-6e-05	-7e-05	-0.958748	-1.70119	-0.842929	-0.465751	-1.43432
EMSC-20140218_0000073	TR	38.608	43.602	ERCV	39.0198	43.3381			U	11	4.6	51.1812	343.689	1668	-0.01091	-0.00365	-2e-05	1e-05	1.90631	0.642653	2.31674	1.63776	0.749674
EMSC-20140221_0000054	GR	38.1934	20.4157	DLFA	38.4784	22.4956			NF	15.9214	4.1	184.154	900	511	-0.01822	-0.37187	0.00018	-0.00012	-1.50999	-2.58162	-1.00898	-1.28584	-2.25083
EMSC-20140221_0000054	GR	38.1934	20.4157	ITM	37.1787	21.9252			NF	15.9214	4.1	174.278	844.349	512	-0.01976	-0.08096	0.00025	3e-05	-1.3402	-2.49598	-0.955388	-1.38659	-2.13039
EMSC-20140221_0000054	GR	38.1934	20.4157	JAN	39.6562	20.8487			NF	15.9214	4.1	166.909	435.911	515	0.01206	-0.02499	3e-05	1e-05	-0.955559	-2.13715	-0.469112	-1.1287	-2.0852
EMSC-20140221_0000054	GR	38.1934	20.4157	KASA	39.7463	19.9354			NF	15.9214	4.1	177.593	900	41	0.09573	-0.04553	-0.00012	1e-05	-1.10511	-2.36543	-0.57676	-1.33732	-2.33429
EMSC-20140221_0000054	GR	38.1934	20.4157	MGNA	38.6561	20.7912			NF	15.9214	4.1	60.9622	411.497	65	0.03929	0.00081	-1e-05	8e-05	0.357834	-1.38543	0.0574118	-0.712759	-1.68356
EMSC-20140221_0000054	GR	38.1934	20.4157	VLMS	37.8766	20.6628			NF	15.9214	4.1	41.3459	533.941	435	-0.06411	-0.00189	-3e-05	5e-05	0.790269	-0.500308	1.16849	0.192397	-0.960939
EMSC-20140221_0000054	GR	38.1934	20.4157	AC01	38.1662	20.5104			NF	15.9214	4.1	8.81275	600	27	-0.0344	-0.03932	2e-05	-6e-05	1.96932	0.337109	1.91865	0.725538	-0.136624
EMSC-20140221_0000054	GR	38.1934	20.4157	AC03	38.1641	20.5062			NF	15.9214	4.1	8.55515	600	6	0.00616	0.00973	-0.00012	-3e-05	2.19702	0.787215	2.63311	1.38438	0.330982
EMSC-20140221_0000054	GR	38.1934	20.4157	AC04	38.1836	20.4874			NF	15.9214	4.1	6.36042	374.579	2	-0.00599	-0.00527	-9e-05	-1e-05	2.02734	0.610488	2.04891	1.40784	0.304784
EMSC-20140221_0000054	GR	38.1934	20.4157	AC05	38.1682	20.496			NF	15.9214	4.1	7.55741	415.132	7	0.02311	0.01365	-7e-05	-4e-05	2.08744	0.63463	2.12872	0.951599	0.0717027
EMSC-20140222_0000051	TR	37.4046	36.3641	KHMN	37.3916	37.1574			NF	9.8965	4.39	70.0925	272.353	599	-0.0127	0.00068	-1e-05	0	1.02711	-0.530839	1.05164	0.138011	-0.933629
EMSC-20140222_0000051	TR	37.4046	36.3641	KRTD	36.5934	35.4157			NF	9.8965	4.39	123.408	362.858	24	-0.00117	-0.00581	1e-05	2e-05	-0.0610334	-0.998558	0.444991	0.0037174	-0.732025
EMSC-20140222_0000051	TR	37.4046	36.3641	NIG	38.108	34.6142			NF	9.8965	4.39	172.576	665.455	2155	0.08773	-0.06392	3e-05	0.00021	-0.029547	-1.07372	0.379024	0.128098	-1.03393
EMSC-20140223_0000077	GR	35.5431	27.1659	KARP	35.5472	27.1612			U	13.2123	3.9	0.62343	883.296	416	0.15252	-0.10626	5e-05	0.0001	2.1341	0.393098	1.835	0.658032	-0.225434
EMSC-20140223_0000077	GR	35.5431	27.1659	KARP	35.5471	27.1611			U	13.2123	3.9	0.624166	883.296	416	0.15252	-0.10626	5e-05	0.0001	2.12563	0.384511	1.82619	0.649089	-0.233842
EMSC-20140223_0000077	GR	35.5431	27.1659	ZKR	35.1147	26.217			U	13.2123	3.9	98.3829	745.462	201	0.10514	-0.01014	-0.00019	-4e-05	-0.831207	-2.18008	-0.385735	-1.11324	-2.35354
EMSC-20140223_0000077	GR	35.5431	27.1659	DATC	36.7584	27.6602			U	13.2123	3.9	142.236	436.096	82	0.02251	-0.00919	3e-05	4e-05	-0.201989	-1.45555	0.192563	-0.604632	-1.66771
EMSC-20140224_0000010	GR	34.8132	24.2108	IMMV	35.4599	23.9802			U	28.5712	4	74.9044	795.072	188	-0.02677	0.13844	6e-05	-0.00015	0.00487801	-1.46456	0.356279	-0.467645	-1.72284
EMSC-20140224_0000010	GR	34.8132	24.2108	KTHA	36.2566	23.0621			U	28.5712	4	191.212	516.09	273	0.05157	-0.0442	0.00023	0.00014	-1.24556	-2.42538	-0.788564	-1.4355	-2.5347
EMSC-20140224_0000010	GR	34.8132	24.2108	GVD	34.8391	24.0874			U	28.5712	4	11.629	669.155	186	0.07511	0.04868	-4e-05	1e-05	1.36598	-0.339958	1.2209	0.113181	-0.868139
EMSC-20140224_0000010	GR	34.8132	24.2108	IACM	35.3058	25.0709			U	28.5712	4	95.5446	395.328	66	-0.00016	0.02528	-0.00012	-1e-05	-0.256	-1.38426	0.176796	-0.201339	-1.568
EMSC-20140224_0000010	GR	34.8132	24.2108	IMMV	35.4599	23.9802			U	28.5712	4	74.9044	795.072	188	-0.02677	0.13844	6e-05	-0.00015	-0.00400719	-1.47254	0.347398	-0.476573	-1.73174
EMSC-20140224_0000010	GR	34.8132	24.2108	KTHA	36.2566	23.0621			U	28.5712	4	191.212	516.09	273	0.05157	-0.0442	0.00023	0.00014	-1.25446	-2.43423	-0.797466	-1.44441	-2.54362
EMSC-20140224_0000010	GR	34.8132	24.2108	ZKR	35.1147	26.217			U	28.5712	4	185.861	745.462	201	0.10514	-0.01014	-0.00019	-4e-05	-1.72979	-2.74084	-1.30402	-1.55373	-2.52104
EMSC-20140226_0000007	GR	40.23	21.64	BERA1	40.7082	19.9455	1007	MASW	NF	25	4.1	152.884	1007	126	-0.03639	0.04255	0.0003	-0.00019	-0.599222	-1.80593	-0.280072	-0.81823	-1.71395
EMSC-20140226_0000007	GR	40.23	21.64	FIER	40.7174	19.5669	374	MASW	NF	25	4.1	183.535	374	14	0.00976	0.00824	0	-2e-05	-0.865117	-2.01259	-0.440436	-0.797644	-1.82081
EMSC-20140226_0000007	GR	40.23	21.64	KBN	40.6232	20.7874	742	MASW	NF	25	4.1	84.3792	742	904	-0.0647	0.02283	-6e-05	6e-05	-0.122882	-1.42484	0.328023	-0.672015	-1.64121
EMSC-20140226_0000007	GR	40.23	21.64	KKS	42.0756	20.4113	745	MASW	NF	25	4.1	229.555	745	319	-0.02773	0.00257	-3e-05	3e-05	-1.4328	-2.53986	-1.09484	-1.38914	-2.17754
EMSC-20140226_0000007	GR	40.23	21.64	LSK	40.1499	20.5987	818	MASW	NF	25	4.1	88.8978	818	914	0.02412	-0.04688	-0.00031	0.00017	-0.200872	-1.49898	-0.00831352	-0.499319	-1.74337
EMSC-20140226_0000007	GR	40.23	21.64	SDA	42.0505	19.5022	1118	MASW	NF	25	4.1	270.215	1118	35	-0.0029	0.00567	5e-05	4e-05	-1.88056	-2.85893	-1.40223	-1.7254	-2.23817
EMSC-20140226_0000007	GR	40.23	21.64	SRN	39.8789	20.0061	1512	MASW	NF	25	4.1	144.439	1512	78	-0.00912	-0.13807	-0.00012	-0.00011	-0.812885	-2.02322	-0.377641	-0.992929	-2.02402
EMSC-20140226_0000007	GR	40.23	21.64	VLO	40.4704	19.4965	375	MASW	NF	25	4.1	183.596	375	39	-0.04404	-0.00932	1e-05	1e-05	-0.887679	-1.93231	-0.406104	-0.710915	-1.73868
EMSC-20140226_0000007	GR	40.23	21.64	DLFA	38.4784	22.4956			NF	25	4.1	208.199	900	511	-0.01822	-0.37187	0.00018	-0.00012	-1.27288	-2.42332	-0.83224	-1.31689	-2.18836
EMSC-20140226_0000007	GR	40.23	21.64	JAN	39.6562	20.8487			NF	25	4.1	92.8527	435.911	515	0.01206	-0.02499	3e-05	1e-05	-0.211353	-1.69495	0.134793	-0.812957	-1.98338
EMSC-20140226_0000007	GR	40.23	21.64	KASA	39.7463	19.9354			NF	25	4.1	154.859	900	41	0.09573	-0.04553	-0.00012	1e-05	-0.980239	-2.2037	-0.427379	-1.13687	-2.16928
EMSC-20140226_0000007	GR	40.23	21.64	MGNA	38.6561	20.7912			NF	25	4.1	189.584	411.497	65	0.03929	0.00081	-1e-05	8e-05	-1.15648	-2.52804	-0.7703	-1.59144	-2.35582
EMSC-20140226_0000007	GR	40.23	21.64	PLG	40.3733	23.4444			NF	25	4.1	153.845	493.142	535	-0.05298	-0.01891	-1e-05	-1e-05	-1.51409	-2.67061	-0.983798	-1.74309	-2.76541
EMSC-20140302_0000014	TR	36.7292	35.1583	KRTD	36.5934	35.4157			TF	5.6495	4.18	27.4802	362.858	24	-0.00117	-0.00581	1e-05	2e-05	0.703876	-0.435546	1.1938	0.704942	-0.367714
EMSC-20140302_0000014	TR	36.7292	35.1583	NIG	38.108	34.6142			TF	5.6495	4.18	160.668	665.455	2155	0.08773	-0.06392	3e-05	0.00021	-0.176908	-1.09363	0.0943447	0.0364753	-1.13781
EMSC-20140305_0000048	GR	38.1095	20.3518	KBN	40.6232	20.7874	742	MASW	SS	11.6	4.9	282.007	742	904	-0.0647	0.02283	-6e-05	6e-05	-1.3215	-2.15784	-1.00996	-0.831421	-1.51768
EMSC-20140305_0000048	GR	38.1095	20.3518	SRN	39.8789	20.0061	1512	MASW	SS	11.6	4.9	199.003	1512	78	-0.00912	-0.13807	-0.00012	-0.00011	-0.992998	-2.02291	-0.540591	-0.777167	-2.07841
EMSC-20140305_0000048	GR	38.1095	20.3518	DLFA	38.4784	22.4956			SS	11.6	4.9	191.531	900	511	-0.01822	-0.37187	0.00018	-0.00012	-1.21018	-2.04699	-0.736428	-0.860927	-1.45207
EMSC-20140305_0000048	GR	38.1095	20.3518	ITM	37.1787	21.9252			SS	11.6	4.9	172.921	844.349	512	-0.01976	-0.08096	0.00025	3e-05	-0.824516	-1.77789	-0.352084	-0.82456	-1.17036
EMSC-20140305_0000048	GR	38.1095	20.3518	JAN	39.6562	20.8487			SS	11.6	4.9	177.277	435.911	515	0.01206	-0.02499	3e-05	1e-05	-0.676451	-1.61693	-0.269976	-0.47166	-1.08202
EMSC-20140305_0000048	GR	38.1095	20.3518	KASA	39.7463	19.9354			SS	11.6	4.9	185.531	900	41	0.09573	-0.04553	-0.00012	1e-05	-0.632516	-1.74187	-0.0487412	-0.58738	-1.31596
EMSC-20140305_0000048	GR	38.1095	20.3518	MGNA	38.6561	20.7912			SS	11.6	4.9	71.834	411.497	65	0.03929	0.00081	-1e-05	8e-05	0.467234	-0.854779	0.497332	0.253696	-0.825246
EMSC-20140305_0000048	GR	38.1095	20.3518	VLMS	37.8766	20.6628			SS	11.6	4.9	37.5986	533.941	435	-0.06411	-0.00189	-3e-05	5e-05	1.11497	-0.367634	1.24839	0.393313	-0.463453
EMSC-20140305_0000048	GR	38.1095	20.3518	AC01	38.1662	20.5104			SS	11.6	4.9	15.2364	600	27	-0.0344	-0.03932	2e-05	-6e-05	1.63643	0.111727	1.6534	0.958161	-0.0351285
EMSC-20140305_0000048	GR	38.1095	20.3518	AC02	38.1632	20.5055			SS	11.6	4.9	14.7091	600	6	0.00616	0.00973	-0.00012	-3e-05	1.81373	0.317285	1.95646	1.18767	-0.0129943
EMSC-20140305_0000048	GR	38.1095	20.3518	AC03	38.1641	20.5062			SS	11.6	4.9	14.8057	600	6	0.00616	0.00973	-0.00012	-3e-05	2.08433	0.697921	2.30492	1.54578	0.366617
EMSC-20140305_0000048	GR	38.1095	20.3518	AC04	38.1836	20.4874			SS	11.6	4.9	14.4395	374.579	2	-0.00599	-0.00527	-9e-05	-1e-05	2.04793	0.625131	2.03764	1.61294	0.396931
EMSC-20140305_0000054	GR	38.0583	20.3492	DLFA	38.4784	22.4956			SS	19.5858	4.22	193.115	900	511	-0.01822	-0.37187	0.00018	-0.00012	-1.70621	-2.92068	-1.36361	-1.70772	-2.67398
EMSC-20140305_0000054	GR	38.0583	20.3492	ITM	37.1787	21.9252			SS	19.5858	4.22	169.802	844.349	512	-0.01976	-0.08096	0.00025	3e-05	-1.31791	-2.66058	-0.959747	-1.60266	-2.43127
EMSC-20140305_0000054	GR	38.0583	20.3492	JAN	39.6562	20.8487			SS	19.5858	4.22	182.862	435.911	515	0.01206	-0.02499	3e-05	1e-05	-1.29114	-2.47714	-0.907107	-1.33944	-2.24085
EMSC-20140305_0000054	GR	38.0583	20.3492	KASA	39.7463	19.9354			SS	19.5858	4.22	191.079	900	41	0.09573	-0.04553	-0.00012	1e-05	-1.34896	-2.60291	-0.774917	-1.48073	-2.42658
EMSC-20140305_0000054	GR	38.0583	20.3492	MGNA	38.6561	20.7912			SS	19.5858	4.22	76.8309	411.497	65	0.03929	0.00081	-1e-05	8e-05	-0.17765	-1.69025	-0.133096	-0.693156	-1.91044
EMSC-20140305_0000054	GR	38.0583	20.3492	VLMS	37.8766	20.6628			SS	19.5858	4.22	34.1201	533.941	435	-0.06411	-0.00189	-3e-05	5e-05	0.508043	-1.0588	0.603657	-0.466219	-1.40766
EMSC-20140305_0000054	GR	38.0583	20.3492	AC01	38.1662	20.5104			SS	19.5858	4.22	18.5162	600	27	-0.0344	-0.03932	2e-05	-6e-05	1.27002	-0.507355	1.01098	0.0274322	-0.993999
EMSC-20140305_0000054	GR	38.0583	20.3492	AC02	38.1632	20.5055			SS	19.5858	4.22	17.9737	600	6	0.00616	0.00973	-0.00012	-3e-05	1.33325	-0.345103	1.25162	0.262554	-0.779171
EMSC-20140305_0000054	GR	38.0583	20.3492	AC03	38.1641	20.5062			SS	19.5858	4.22	18.0852	600	6	0.00616	0.00973	-0.00012	-3e-05	1.70424	0.116517	1.88553	0.649246	-0.450914
EMSC-20140305_0000054	GR	38.0583	20.3492	AC04	38.1836	20.4874			SS	19.5858	4.22	18.4466	374.579	2	-0.00599	-0.00527	-9e-05	-1e-05	1.31415	-0.28948	1.27268	0.360048	-0.658917
EMSC-20140308_0000091	IT	37.938	14.886	CAR1	39.2534	16.2114			NF	32.38	3.8	186.171	419.207	628.92	0.02635	-0.18406	0.00291	0.00193	-1.23128	-2.54973	-0.774627	-1.46742	-2.65249
EMSC-20140308_0000091	IT	37.938	14.886	CELI	39.4027	16.5088			NF	32.38	3.8	215.338	494.642	1243.76	-0.0776	0.12593	0.00083	0.00178	-2.14827	-3.23433	-1.58724	-2.04657	-2.96414
EMSC-20140308_0000091	IT	37.938	14.886	EPOZ	37.6719	15.1885			NF	32.38	3.8	39.7718	460.817	53.815	0.01757	0.03045	0.00011	0.00025	0.0423505	-1.30574	0.461142	-0.356442	-1.46691
EMSC-20140308_0000091	IT	37.938	14.886	EVRN	37.6892	15.1356			NF	32.38	3.8	35.3004	460.817	351.521	0.00709	0.11715	-0.00103	-0.00024	0.422824	-1.0937	0.726242	-0.361526	-1.50053
EMSC-20140308_0000091	IT	37.938	14.886	JOPP	38.6068	15.8856			NF	32.38	3.8	114.65	488.391	504.213	0.12262	-0.20414	0.0001	0.00077	-1.15048	-2.60241	-0.752164	-1.71534	-2.80034
EMSC-20140308_0000091	IT	37.938	14.886	PLAC	38.4494	16.4383			NF	32.38	3.8	147.091	404.99	529.022	0.08808	0.12285	0.00468	0.00079	-1.41951	-2.53196	-1.06875	-1.5175	-2.55197
EMSC-20140308_0000091	IT	37.938	14.886	CEL	38.2603	15.8939			NF	32.38	3.8	95.1981	533.959	639.022	0.13038	-0.416	0.00255	-0.00228	-1.19053	-2.5085	-0.900573	-1.50287	-2.66799
EMSC-20140308_0000091	IT	37.938	14.886	TIP	39.1794	16.7583			NF	32.38	3.8	213.433	533.388	776.877	0.22392	0.14522	-0.00153	-0.00412	-2.40583	-3.32892	-1.99352	-2.1177	-3.13489
EMSC-20140310_0000116	GR	38.2239	20.3118	DLFA	38.4784	22.4956			TF	15.6308	4.31	192.52	900	511	-0.01822	-0.37187	0.00018	-0.00012	-1.67055	-2.68716	-1.27964	-1.43318	-2.38551
EMSC-20140310_0000116	GR	38.2239	20.3118	ITM	37.1787	21.9252			TF	15.6308	4.31	183.449	844.349	512	-0.01976	-0.08096	0.00025	3e-05	-1.25777	-2.53549	-0.948025	-1.27502	-2.30626
EMSC-20140310_0000116	GR	38.2239	20.3118	JAN	39.6562	20.8487			TF	15.6308	4.31	165.891	435.911	515	0.01206	-0.02499	3e-05	1e-05	-1.27585	-2.504	-0.8329	-1.35115	-2.17823
EMSC-20140310_0000116	GR	38.2239	20.3118	KASA	39.7463	19.9354			TF	15.6308	4.31	172.378	900	41	0.09573	-0.04553	-0.00012	1e-05	-1.42255	-2.6536	-0.779922	-1.42199	-2.30669
EMSC-20140310_0000116	GR	38.2239	20.3118	MGNA	38.6561	20.7912			TF	15.6308	4.31	63.6568	411.497	65	0.03929	0.00081	-1e-05	8e-05	-0.321092	-1.96434	-0.311972	-0.941584	-1.85589
EMSC-20140310_0000116	GR	38.2239	20.3118	AC01	38.1662	20.5104			TF	15.6308	4.31	18.5035	600	27	-0.0344	-0.03932	2e-05	-6e-05	1.27157	-0.214888	1.34466	0.359868	-0.596935
EMSC-20140310_0000116	GR	38.2239	20.3118	AC02	38.1632	20.5055			TF	15.6308	4.31	18.2236	600	6	0.00616	0.00973	-0.00012	-3e-05	1.66561	0.294438	2.18782	0.812037	-0.169845
EMSC-20140310_0000116	GR	38.2239	20.3118	AC03	38.1641	20.5062			TF	15.6308	4.31	18.2437	600	6	0.00616	0.00973	-0.00012	-3e-05	1.91915	0.560816	2.43265	1.20602	0.152681
EMSC-20140315_0000025	GR	37.5583	25.6503	AMGA	36.8316	25.8938			NF	16.7859	4.1	83.6379	625.424	282	-0.01177	-0.0446	0.00022	3e-05	-0.5675	-1.9196	-0.229428	-0.988916	-1.97937
EMSC-20140315_0000025	GR	37.5583	25.6503	NOAC	37.9738	23.7177			NF	16.7859	4.1	176.049	434.005	96	-0.02322	0.00027	5e-05	6e-05	-0.922416	-2.27023	-0.395379	-1.32486	-2.28815
EMSC-20140315_0000025	GR	37.5583	25.6503	PRK	39.2456	26.265			NF	16.7859	4.1	195.119	439.853	104	-0.02311	-0.00716	4e-05	3e-05	-0.916563	-1.96913	-0.533741	-0.68722	-1.91275
EMSC-20140315_0000025	GR	37.5583	25.6503	PSRA	38.5398	25.562			NF	16.7859	4.1	109.409	600	11	-0.00241	-0.0154	5e-05	-2e-05	0.0567943	-1.35446	0.217534	-0.627106	-1.70161
EMSC-20140315_0000025	GR	37.5583	25.6503	TNSA	37.5394	25.1631			NF	16.7859	4.1	43.0023	498.109	10	-0.00543	-0.03838	0	-6e-05	0.202971	-1.54077	-0.0249965	-1.08096	-1.87877
EMSC-20140315_0000025	GR	37.5583	25.6503	DATC	36.7584	27.6602			NF	16.7859	4.1	199.082	436.096	82	0.02251	-0.00919	3e-05	4e-05	-0.673677	-1.79839	-0.182757	-0.569512	-1.59757
EMSC-20140315_0000025	GR	37.5583	25.6503	DIDI	37.3767	27.2398			NF	16.7859	4.1	141.726	315.946	47	-0.01473	0.00554	0	3e-05	0.139421	-1.07928	0.513086	-0.0507013	-1.1843
EMSC-20140315_0000025	GR	37.5583	25.6503	FOCM	38.7131	26.7309			NF	16.7859	4.1	159.436	553.331	7	-0.0426	-0.00284	-0.0001	1e-05	-0.260205	-1.49088	0.160474	-0.295995	-1.49607
EMSC-20140315_0000025	GR	37.5583	25.6503	GMLD	38.0764	26.8747			NF	16.7859	4.1	122.008	506.73	140	-0.02582	-0.03851	2e-05	1e-05	0.476177	-0.718733	0.996505	-0.0158964	-1.11439
EMSC-20140315_0000025	GR	37.5583	25.6503	KRBN	38.5936	26.5537			NF	16.7859	4.1	139.661	843.228	94	0.08041	0.05121	1e-05	8e-05	0.0426604	-1.27383	0.578743	-0.0667608	-1.34975
EMSC-20140326_0000054	GR	34.8992	26.0022	IMMV	35.4599	23.9802			U	10.7545	4.2	194.053	795.072	188	-0.02677	0.13844	6e-05	-0.00015	-1.30515	-2.4274	-0.738565	-1.04805	-2.26451
EMSC-20140326_0000054	GR	34.8992	26.0022	KARP	35.5472	27.1612			U	10.7545	4.2	127.574	883.296	416	0.15252	-0.10626	5e-05	0.0001	-0.949024	-2.32863	-0.627102	-1.03179	-2.21184
EMSC-20140326_0000054	GR	34.8992	26.0022	GVD	34.8391	24.0874			U	10.7545	4.2	174.816	669.155	186	0.07511	0.04868	-4e-05	1e-05	-1.27081	-2.36785	-0.784864	-1.20119	-2.26737
EMSC-20140326_0000054	GR	34.8992	26.0022	IACM	35.3058	25.0709			U	10.7545	4.2	96.0298	395.328	66	-0.00016	0.02528	-0.00012	-1e-05	-0.295201	-1.40254	0.228187	-0.0235331	-1.41569
EMSC-20140326_0000054	GR	34.8992	26.0022	IMMV	35.4599	23.9802			U	10.7545	4.2	194.053	795.072	188	-0.02677	0.13844	6e-05	-0.00015	-1.31394	-2.44733	-0.747401	-1.05655	-2.29135
EMSC-20140326_0000054	GR	34.8992	26.0022	KARP	35.5471	27.1611			U	10.7545	4.2	127.557	883.296	416	0.15252	-0.10626	5e-05	0.0001	-0.957577	-2.3497	-0.636241	-1.04058	-2.2312
EMSC-20140326_0000054	GR	34.8992	26.0022	ZKR	35.1147	26.217			U	10.7545	4.2	30.9343	745.462	201	0.10514	-0.01014	-0.00019	-4e-05	0.703997	-0.741734	0.8715	-0.121692	-1.125
EMSC-20140326_0000065	TR	38.133	38.5835	ARPR	39.0929	38.3356			U	6.1841	4	108.887	773.272	1604	-0.00676	-0.13417	0.00027	3e-05	0.32585	-0.96165	0.725613	0.0667812	-1.18149
EMSC-20140419_0000134	TR	37.0353	28.8854	KSL	36.1503	29.5856			U	17.1134	4	116.582	557.733	102	0.0315	0.04718	0.00018	-5e-05	-1.00295	-1.98451	-0.570008	-0.935024	-1.97021
EMSC-20140419_0000134	TR	37.0353	28.8854	BASM	37.9194	30.035			U	17.1134	4	141.255	394.599	907	-0.02337	-0.02095	2e-05	-2e-05	-0.568801	-1.60387	-0.139815	-0.186101	-1.35737
EMSC-20140419_0000134	TR	37.0353	28.8854	DATC	36.7584	27.6602			U	17.1134	4	113.216	436.096	82	0.02251	-0.00919	3e-05	4e-05	0.295621	-0.851088	0.732951	0.407494	-0.936717
EMSC-20140419_0000134	TR	37.0353	28.8854	DENT	37.7539	29.0331			U	17.1134	4	80.963	900	656	0.06213	0.12068	2e-05	-6e-05	-0.0071816	-1.25811	0.37155	-0.145284	-1.27474
EMSC-20140419_0000134	TR	37.0353	28.8854	MRSB	36.7161	28.1969			U	17.1134	4	70.7832	732.254	433	0.02065	0.05366	0.00022	-0.00037	0.42829	-0.924243	0.842785	-0.326293	-1.32235
EMSC-20140419_0000134	TR	37.0353	28.8854	SHAP	39.0231	29.222			U	17.1134	4	222.99	495.541	1009	-0.00572	-0.03743	-0.00018	0	-1.24969	-2.2742	-0.77851	-1.16265	-1.83675
EMSC-20140430_0000008	GR	38.22	25.2	ALNA	39.148	23.8667			SS	10	4.93	155.053	604.69	8	0.03835	-0.03635	-5e-05	-6e-05	-0.26318	-1.17903	-0.0729054	0.199485	-0.911487
EMSC-20140430_0000008	GR	38.22	25.2	AMGA	36.8316	25.8938			SS	10	4.93	166.067	625.424	282	-0.01177	-0.0446	0.00022	3e-05	-0.593571	-1.80524	-0.166396	-0.833145	-1.32029
EMSC-20140430_0000008	GR	38.22	25.2	KYMI	38.6331	24.1001			SS	10	4.93	106.253	703.927	266	0.09836	0.01122	5e-05	4e-05	-0.314714	-1.34381	0.123524	-0.22371	-1.06437
EMSC-20140430_0000008	GR	38.22	25.2	LIA	39.8972	25.1806			SS	10	4.93	186.509	464.17	45	0.04683	-0.0177	-3e-05	-1e-05	-0.86754	-1.84583	-0.419601	-0.713703	-1.35875
EMSC-20140430_0000008	GR	38.22	25.2	NOAC	37.9738	23.7177			SS	10	4.93	132.569	434.005	96	-0.02322	0.00027	5e-05	6e-05	0.172042	-1.0355	0.612576	0.15427	-0.653406
EMSC-20140430_0000008	GR	38.22	25.2	PRK	39.2456	26.265			SS	10	4.93	146.764	439.853	104	-0.02311	-0.00716	4e-05	3e-05	-0.46002	-1.43246	-0.107658	-0.0746428	-0.987278
EMSC-20140430_0000008	GR	38.22	25.2	PSRA	38.5398	25.562			SS	10	4.93	47.541	600	11	-0.00241	-0.0154	5e-05	-2e-05	1.01397	-0.470861	1.15038	0.375671	-0.697451
EMSC-20140430_0000008	GR	38.22	25.2	TNSA	37.5394	25.1631			SS	10	4.93	75.7463	498.109	10	-0.00543	-0.03838	0	-6e-05	0.451878	-0.882768	0.831241	-0.142881	-0.861171
EMSC-20140430_0000008	GR	38.22	25.2	YDRA	37.3495	23.4653			SS	10	4.93	180.576	693.523	86	-0.04435	0.15921	8e-05	-0.0002	-0.237381	-1.18101	0.191937	0.0198891	-1.04708
EMSC-20140430_0000008	GR	38.22	25.2	KRBN	38.5936	26.5537			SS	10	4.93	125.054	843.228	94	0.08041	0.05121	1e-05	8e-05	0.501757	-0.382583	0.925198	0.838262	-0.0362499
EMSC-20140501_0000045	TR	38.0246	27.0368	AMGA	36.8316	25.8938			U	9.6042	4.1	166.684	625.424	282	-0.01177	-0.0446	0.00022	3e-05	-0.947717	-2.35626	-0.588276	-1.49958	-2.40998
EMSC-20140501_0000045	TR	38.0246	27.0368	PRK	39.2456	26.265			U	9.6042	4.1	151.421	439.853	104	-0.02311	-0.00716	4e-05	3e-05	-0.791886	-1.79635	-0.322854	-0.62788	-1.89952
EMSC-20140501_0000045	TR	38.0246	27.0368	PSRA	38.5398	25.562			U	9.6042	4.1	140.894	600	11	-0.00241	-0.0154	5e-05	-2e-05	-0.426029	-1.88402	-0.0602641	-1.32407	-2.3759
EMSC-20140501_0000045	TR	38.0246	27.0368	TNSA	37.5394	25.1631			U	9.6042	4.1	173.274	498.109	10	-0.00543	-0.03838	0	-6e-05	-1.22561	-2.72465	-0.874437	-1.91022	-2.9395
EMSC-20140501_0000045	TR	38.0246	27.0368	AKS	38.8785	27.8129			U	9.6042	4.1	116.544	541.408	331	0.04978	0.04567	0.00012	0.00025	-0.170876	-1.46921	0.251243	-0.641958	-1.46963
EMSC-20140501_0000045	TR	38.0246	27.0368	DATC	36.7584	27.6602			U	9.6042	4.1	151.182	436.096	82	0.02251	-0.00919	3e-05	4e-05	-0.215848	-1.3381	0.100389	-0.211284	-1.18445
EMSC-20140501_0000045	TR	38.0246	27.0368	GOMA	38.7077	27.9175			U	9.6042	4.1	108.004	636.467	132	0.07518	0.04702	-7e-05	-4e-05	-0.0638659	-1.31291	0.451094	-0.374845	-1.53151
EMSC-20140501_0000045	TR	38.0246	27.0368	GONE	40.0466	27.686			U	9.6042	4.1	231.721	440.139	144	-0.03639	0.04445	-0.00014	-2e-05	-1.00572	-1.9641	-0.624456	-0.69483	-1.73424
EMSC-20140501_0000045	TR	38.0246	27.0368	KRBN	38.5936	26.5537			U	9.6042	4.1	76.0249	843.228	94	0.08041	0.05121	1e-05	8e-05	0.543333	-0.817277	1.00552	0.029964	-1.13274
EMSC-20140501_0000045	TR	38.0246	27.0368	SHAP	39.0231	29.222			U	9.6042	4.1	220.136	495.541	1009	-0.00572	-0.03743	-0.00018	0	-1.0611	-2.28109	-0.701388	-1.05471	-2.0647
EMSC-20140501_0000045	TR	38.0246	27.0368	SMAA	39.1005	28.9805			U	9.6042	4.1	207.049	274.72	799	-0.00364	0.00311	0	0	-0.594637	-1.46117	-0.228151	-0.217856	-1.36074
EMSC-20140501_0000057	TR	37.0062	27.4809	KARP	35.5472	27.1612			U	8.933	4.1	164.745	883.296	416	0.15252	-0.10626	5e-05	0.0001	-1.54626	-2.926	-1.17412	-1.77792	-2.72243
EMSC-20140501_0000057	TR	37.0062	27.4809	AMGA	36.8316	25.8938			U	8.933	4.1	142.418	625.424	282	-0.01177	-0.0446	0.00022	3e-05	-1.33979	-2.61018	-1.14321	-1.91831	-2.19869
EMSC-20140501_0000057	TR	37.0062	27.4809	KARP	35.5471	27.1611			U	8.933	4.1	164.758	883.296	416	0.15252	-0.10626	5e-05	0.0001	-1.55516	-2.93463	-1.18302	-1.78682	-2.73136
EMSC-20140501_0000057	TR	37.0062	27.4809	DATC	36.7584	27.6602			U	8.933	4.1	31.8362	436.096	82	0.02251	-0.00919	3e-05	4e-05	0.810687	-0.61373	1.08612	0.19673	-0.728537
EMSC-20140501_0000057	TR	37.0062	27.4809	DENT	37.7539	29.0331			U	8.933	4.1	160.379	900	656	0.06213	0.12068	2e-05	-6e-05	-0.467566	-1.55921	-0.010151	-0.579982	-1.50972
EMSC-20140506_0000009	GR	39.3589	23.8722	ALNA	39.148	23.8667			U	15.877	4.1	23.4514	604.69	8	0.03835	-0.03635	-5e-05	-6e-05	0.786974	-0.663915	0.777638	0.464017	-0.806179
EMSC-20140506_0000009	GR	39.3589	23.8722	DLFA	38.4784	22.4956			U	15.877	4.1	154.169	900	511	-0.01822	-0.37187	0.00018	-0.00012	-0.962493	-2.0409	-0.565437	-0.794404	-1.80415
EMSC-20140506_0000009	GR	39.3589	23.8722	KVLA	40.937	24.3859			U	15.877	4.1	180.831	748.058	74	0.06768	-0.09968	-0.0001	-0.00014	-1.18358	-2.4503	-0.702593	-1.44827	-2.10776
EMSC-20140506_0000009	GR	39.3589	23.8722	KYMI	38.6331	24.1001			U	15.877	4.1	83.0693	703.927	266	0.09836	0.01122	5e-05	4e-05	-0.400255	-1.6096	0.0626355	-0.611872	-1.67061
EMSC-20140506_0000009	GR	39.3589	23.8722	LIA	39.8972	25.1806			U	15.877	4.1	127.036	464.17	45	0.04683	-0.0177	-3e-05	-1e-05	-0.318107	-1.64733	0.141288	-0.761486	-1.59791
EMSC-20140506_0000009	GR	39.3589	23.8722	NOAC	37.9738	23.7177			U	15.877	4.1	154.595	434.005	96	-0.02322	0.00027	5e-05	6e-05	-0.827514	-1.9922	-0.480015	-0.951035	-1.83464
EMSC-20140506_0000009	GR	39.3589	23.8722	PLG	40.3733	23.4444			U	15.877	4.1	118.555	493.142	535	-0.05298	-0.01891	-1e-05	-1e-05	-0.513417	-1.81353	-0.427727	-0.681086	-1.83358
EMSC-20140506_0000009	GR	39.3589	23.8722	PRK	39.2456	26.265			U	15.877	4.1	206.265	439.853	104	-0.02311	-0.00716	4e-05	3e-05	-1.31765	-2.25764	-0.892856	-0.990389	-2.05867
EMSC-20140506_0000009	GR	39.3589	23.8722	PSRA	38.5398	25.562			U	15.877	4.1	172.186	600	11	-0.00241	-0.0154	5e-05	-2e-05	-0.787891	-2.13464	-0.418898	-1.35492	-2.11717
EMSC-20140506_0000009	GR	39.3589	23.8722	SMTH	40.4709	25.5304			U	15.877	4.1	187.853	900	356	-0.27133	-0.01567	-0.00034	0.00014	-1.07381	-2.53358	-0.643471	-1.73094	-2.57784
EMSC-20140518_0000036	GR	34.9191	26.1399	IMMV	35.4599	23.9802			U	19.4528	4.3	205.26	795.072	188	-0.02677	0.13844	6e-05	-0.00015	-1.12011	-2.31845	-0.58488	-1.07442	-2.17503
EMSC-20140518_0000036	GR	34.9191	26.1399	KARP	35.5472	27.1612			U	19.4528	4.3	116.112	883.296	416	0.15252	-0.10626	5e-05	0.0001	-0.618729	-1.88276	-0.266124	-0.856576	-2.09131
EMSC-20140518_0000036	GR	34.9191	26.1399	GVD	34.8391	24.0874			U	19.4528	4.3	187.438	669.155	186	0.07511	0.04868	-4e-05	1e-05	-1.10934	-2.24146	-0.49321	-1.20239	-2.27262
EMSC-20140518_0000036	GR	34.9191	26.1399	IACM	35.3058	25.0709			U	19.4528	4.3	106.319	395.328	66	-0.00016	0.02528	-0.00012	-1e-05	0.0741692	-1.10631	0.635013	-0.0562752	-1.39195
EMSC-20140518_0000036	GR	34.9191	26.1399	IMMV	35.4599	23.9802			U	19.4528	4.3	205.26	795.072	188	-0.02677	0.13844	6e-05	-0.00015	-1.12905	-2.32718	-0.593817	-1.08346	-2.18786
EMSC-20140518_0000036	GR	34.9191	26.1399	KARP	35.5471	27.1611			U	19.4528	4.3	116.095	883.296	416	0.15252	-0.10626	5e-05	0.0001	-0.627535	-1.89222	-0.275034	-0.865579	-2.10221
EMSC-20140518_0000036	GR	34.9191	26.1399	ZKR	35.1147	26.217			U	19.4528	4.3	22.8549	745.462	201	0.10514	-0.01014	-0.00019	-4e-05	1.00927	-0.529689	1.08748	0.140168	-0.883827
EMSC-20140520_0000062	GR	39.5389	24.1761	ALNA	39.148	23.8667			U	17.4326	4.3	50.9593	604.69	8	0.03835	-0.03635	-5e-05	-6e-05	0.417947	-0.920357	0.773002	0.477236	-0.984118
EMSC-20140520_0000062	GR	39.5389	24.1761	DION	38.0779	23.9331			U	17.4326	4.3	163.81	688.95	411	0.01094	0.09892	-3e-05	-0.00012	-0.4945	-1.79465	-0.23534	-0.628222	-1.6799
EMSC-20140520_0000062	GR	39.5389	24.1761	DLFA	38.4784	22.4956			U	17.4326	4.3	187.047	900	511	-0.01822	-0.37187	0.00018	-0.00012	-1.25925	-2.3496	-0.848868	-1.09643	-2.16234
EMSC-20140520_0000062	GR	39.5389	24.1761	KVLA	40.937	24.3859			U	17.4326	4.3	156.483	748.058	74	0.06768	-0.09968	-0.0001	-0.00014	-0.671529	-1.93077	-0.0860955	-1.25746	-1.79417
EMSC-20140520_0000062	GR	39.5389	24.1761	KYMI	38.6331	24.1001			U	17.4326	4.3	100.928	703.927	266	0.09836	0.01122	5e-05	4e-05	-0.16821	-1.43766	-0.122809	-0.341379	-1.24353
EMSC-20140520_0000062	GR	39.5389	24.1761	LIA	39.8972	25.1806			U	17.4326	4.3	94.7016	464.17	45	0.04683	-0.0177	-3e-05	-1e-05	-0.323109	-1.6261	0.0237202	-0.670753	-1.59328
EMSC-20140520_0000062	GR	39.5389	24.1761	NOAC	37.9738	23.7177			U	17.4326	4.3	178.508	434.005	96	-0.02322	0.00027	5e-05	6e-05	-0.466718	-1.69746	-0.0498893	-0.554227	-1.45857
EMSC-20140520_0000062	GR	39.5389	24.1761	PLG	40.3733	23.4444			U	17.4326	4.3	111.79	493.142	535	-0.05298	-0.01891	-1e-05	-1e-05	-0.858688	-2.06958	-0.503487	-1.18783	-1.87572
EMSC-20140520_0000062	GR	39.5389	24.1761	PRK	39.2456	26.265			U	17.4326	4.3	182.439	439.853	104	-0.02311	-0.00716	4e-05	3e-05	-0.920887	-1.96529	-0.476509	-0.683054	-1.62987
EMSC-20140520_0000062	GR	39.5389	24.1761	PSRA	38.5398	25.562			U	17.4326	4.3	163.305	600	11	-0.00241	-0.0154	5e-05	-2e-05	-0.469622	-1.83799	-0.129568	-1.05315	-1.58731
EMSC-20140520_0000062	GR	39.5389	24.1761	SMTH	40.4709	25.5304			U	17.4326	4.3	155.07	900	356	-0.27133	-0.01567	-0.00034	0.00014	-0.808217	-2.19024	-0.283919	-1.59089	-2.28687
EMSC-20140524_0000026	GR	40.2893	25.3889	KBN	40.6232	20.7874	742	MASW	SS	6.43	6.5	391.046	742	904	-0.0647	0.02283	-6e-05	6e-05	-0.199137	-0.357267	-0.146026	0.279385	-0.0188483
EMSC-20140524_0000026	GR	40.2893	25.3889	KKS	42.0756	20.4113	745	MASW	SS	6.43	6.5	461.392	745	319	-0.02773	0.00257	-3e-05	3e-05	-0.418043	-0.702752	-0.326731	-0.0804242	-0.0791518
EMSC-20140524_0000026	GR	40.2893	25.3889	LSK	40.1499	20.5987	818	MASW	SS	6.43	6.5	406.961	818	914	0.02412	-0.04688	-0.00031	0.00017	-0.0593766	-0.39796	-0.0414812	0.480737	0.195308
EMSC-20140524_0000026	GR	40.2893	25.3889	ALNA	39.148	23.8667			SS	6.43	6.5	181.804	604.69	8	0.03835	-0.03635	-5e-05	-6e-05	1.05311	0.296919	1.19729	1.60331	0.641189
EMSC-20140524_0000026	GR	40.2893	25.3889	DION	38.0779	23.9331			SS	6.43	6.5	276.046	688.95	411	0.01094	0.09892	-3e-05	-0.00012	0.266109	-0.436057	0.566354	0.58457	0.113957
EMSC-20140524_0000026	GR	40.2893	25.3889	DLFA	38.4784	22.4956			SS	6.43	6.5	319.935	900	511	-0.01822	-0.37187	0.00018	-0.00012	-0.0398292	-0.314447	0.0972779	0.353811	0.15889
EMSC-20140524_0000026	GR	40.2893	25.3889	EFSA	39.5401	24.9886			SS	6.43	6.5	90.0246	477.937	20	-0.02705	0.04364	-2e-05	-7e-05	1.78118	0.833159	2.19414	1.8644	1.09023
EMSC-20140524_0000026	GR	40.2893	25.3889	JAN	39.6562	20.8487			SS	6.43	6.5	393.193	435.911	515	0.01206	-0.02499	3e-05	1e-05	-0.167797	-0.229539	0.0850168	0.0913134	0.0707737
EMSC-20140524_0000026	GR	40.2893	25.3889	KVLA	40.937	24.3859			SS	6.43	6.5	111.154	748.058	74	0.06768	-0.09968	-0.0001	-0.00014	1.19685	0.156017	1.63578	1.11901	0.610212
EMSC-20140524_0000026	GR	40.2893	25.3889	KYMI	38.6331	24.1001			SS	6.43	6.5	214.829	703.927	266	0.09836	0.01122	5e-05	4e-05	0.507059	-0.0843777	0.812925	0.891962	0.47247
EMSC-20140524_0000026	GR	40.2893	25.3889	LIA	39.8972	25.1806			SS	6.43	6.5	47.0589	464.17	45	0.04683	-0.0177	-3e-05	-1e-05	1.9849	0.85482	2.25684	1.88425	1.00066
EMSC-20140524_0000026	GR	40.2893	25.3889	MGNA	38.6561	20.7912			SS	6.43	6.5	434.35	411.497	65	0.03929	0.00081	-1e-05	8e-05	-0.383046	-0.409734	-0.352492	-0.205322	-0.0279113
EMSC-20140524_0000026	GR	40.2893	25.3889	PLG	40.3733	23.4444			SS	6.43	6.5	165.085	493.142	535	-0.05298	-0.01891	-1e-05	-1e-05	0.970435	0.0823529	1.32774	1.09775	0.523677
EMSC-20140524_0000026	GR	40.2893	25.3889	PRK	39.2456	26.265			SS	6.43	6.5	138.107	439.853	104	-0.02311	-0.00716	4e-05	3e-05	1.41655	0.644058	1.71134	1.79626	1.09685
EMSC-20140524_0000026	GR	40.2893	25.3889	PSRA	38.5398	25.562			SS	6.43	6.5	195.105	600	11	-0.00241	-0.0154	5e-05	-2e-05	0.803302	0.00321591	1.19364	0.844641	0.400607
EMSC-20140524_0000026	GR	40.2893	25.3889	SMTH	40.4709	25.5304			SS	6.43	6.5	23.4882	900	356	-0.27133	-0.01567	-0.00034	0.00014	2.00207	0.568111	1.92127	1.18952	1.00254
EMSC-20140524_0000026	GR	40.2893	25.3889	TNSA	37.5394	25.1631			SS	6.43	6.5	306.396	498.109	10	-0.00543	-0.03838	0	-6e-05	-0.0857017	-0.548354	0.231912	0.124013	-0.0510753
EMSC-20140524_0000026	GR	40.2893	25.3889	YDRA	37.3495	23.4653			SS	6.43	6.5	366.897	693.523	86	-0.04435	0.15921	8e-05	-0.0002	0.135274	-0.500651	0.256019	0.700023	0.095508
EMSC-20140524_0000026	GR	40.2893	25.3889	OSMT	40.601	29.7			SS	6.43	6.5	366.421	875.613	779	-0.00248	-0.17182	-0.00014	-0.0001	1.12075	0.720236	1.46676	1.32602	1.14118
EMSC-20140524_0000034	TR	40.42	26.06	EFSA	39.5401	24.9886			U	10	4.6	133.806	477.937	20	-0.02705	0.04364	-2e-05	-7e-05	-0.721687	-1.83724	-0.157426	-0.927755	-1.83885
EMSC-20140524_0000034	TR	40.42	26.06	KVLA	40.937	24.3859			U	10	4.6	152.427	748.058	74	0.06768	-0.09968	-0.0001	-0.00014	-1.03992	-2.38041	-0.692849	-1.53755	-2.58299
EMSC-20140524_0000034	TR	40.42	26.06	LIA	39.8972	25.1806			U	10	4.6	94.6799	464.17	45	0.04683	-0.0177	-3e-05	-1e-05	-0.278586	-1.54981	0.118141	-0.711951	-1.82045
EMSC-20140524_0000034	TR	40.42	26.06	PRK	39.2456	26.265			U	10	4.6	131.75	439.853	104	-0.02311	-0.00716	4e-05	3e-05	-0.276763	-1.30483	0.159797	-0.134225	-1.38936
EMSC-20140524_0000034	TR	40.42	26.06	PSRA	38.5398	25.562			U	10	4.6	213.394	600	11	-0.00241	-0.0154	5e-05	-2e-05	-0.970576	-2.35618	-0.601234	-1.60446	-2.73662
EMSC-20140524_0000034	TR	40.42	26.06	SMTH	40.4709	25.5304			U	10	4.6	45.1681	900	356	-0.27133	-0.01567	-0.00034	0.00014	0.409201	-1.32445	0.19307	-0.990796	-1.80437
EMSC-20140524_0000034	TR	40.42	26.06	UKOP	41.1288	26.6322			U	10	4.6	92.3758	342.022	67	0.00357	-0.01594	0	0	0.651325	-0.696391	0.966335	0.162317	-0.956013
EMSC-20140524_0000039	TR	40.4135	26.1019	EFSA	39.5401	24.9886			U	13.7202	4.3	135.752	477.937	20	-0.02705	0.04364	-2e-05	-7e-05	-0.80416	-2.17843	-0.457701	-1.11701	-2.17044
EMSC-20140524_0000039	TR	40.4135	26.1019	KVLA	40.937	24.3859			U	13.7202	4.3	155.98	748.058	74	0.06768	-0.09968	-0.0001	-0.00014	-1.26389	-2.5869	-0.75483	-1.85115	-2.86733
EMSC-20140524_0000039	TR	40.4135	26.1019	LIA	39.8972	25.1806			U	13.7202	4.3	97.089	464.17	45	0.04683	-0.0177	-3e-05	-1e-05	-0.464828	-1.92226	-0.244388	-1.00256	-2.25162
EMSC-20140524_0000039	TR	40.4135	26.1019	PRK	39.2456	26.265			U	13.7202	4.3	130.604	439.853	104	-0.02311	-0.00716	4e-05	3e-05	-0.317165	-1.57914	-0.187212	-0.398727	-1.6114
EMSC-20140524_0000039	TR	40.4135	26.1019	PSRA	38.5398	25.562			U	13.7202	4.3	213.437	600	11	-0.00241	-0.0154	5e-05	-2e-05	-1.11506	-2.57312	-0.786758	-1.81194	-2.80575
EMSC-20140524_0000039	TR	40.4135	26.1019	SMTH	40.4709	25.5304			U	13.7202	4.3	48.7794	900	356	-0.27133	-0.01567	-0.00034	0.00014	0.362306	-1.29383	0.249796	-0.857715	-1.72055
EMSC-20140524_0000039	TR	40.4135	26.1019	UKOP	41.1288	26.6322			U	13.7202	4.3	91.2162	342.022	67	0.00357	-0.01594	0	0	0.41404	-1.08931	0.628112	-0.384182	-1.43313
EMSC-20140524_0000054	GR	40.2944	25.6596	ALNA	39.148	23.8667			U	11.9586	4.5	199.397	604.69	8	0.03835	-0.03635	-5e-05	-6e-05	-1.28101	-2.07133	-1.09383	-0.642655	-1.90538
EMSC-20140524_0000054	GR	40.2944	25.6596	EFSA	39.5401	24.9886			U	11.9586	4.5	101.529	477.937	20	-0.02705	0.04364	-2e-05	-7e-05	-0.402828	-1.58027	-0.110318	-0.481497	-1.43575
EMSC-20140524_0000054	GR	40.2944	25.6596	KVLA	40.937	24.3859			U	11.9586	4.5	129.088	748.058	74	0.06768	-0.09968	-0.0001	-0.00014	-0.670123	-2.03573	-0.222401	-1.19052	-1.82796
EMSC-20140524_0000054	GR	40.2944	25.6596	LIA	39.8972	25.1806			U	11.9586	4.5	60.0882	464.17	45	0.04683	-0.0177	-3e-05	-1e-05	0.0209094	-1.71186	-0.12616	-0.775092	-1.72494
EMSC-20140524_0000054	GR	40.2944	25.6596	PLG	40.3733	23.4444			U	11.9586	4.5	187.963	493.142	535	-0.05298	-0.01891	-1e-05	-1e-05	-1.53789	-2.61135	-1.03076	-1.36902	-2.23226
EMSC-20140524_0000054	GR	40.2944	25.6596	PRK	39.2456	26.265			U	11.9586	4.5	127.578	439.853	104	-0.02311	-0.00716	4e-05	3e-05	-0.589521	-1.72341	-0.293694	-0.521079	-1.57656
EMSC-20140524_0000054	GR	40.2944	25.6596	PSRA	38.5398	25.562			U	11.9586	4.5	195.285	600	11	-0.00241	-0.0154	5e-05	-2e-05	-0.998002	-2.29998	-0.655804	-1.21877	-2.1561
EMSC-20140524_0000054	GR	40.2944	25.6596	SMTH	40.4709	25.5304			U	11.9586	4.5	22.4725	900	356	-0.27133	-0.01567	-0.00034	0.00014	0.870177	-0.848487	0.554985	-0.342685	-1.05064
EMSC-20140524_0000054	GR	40.2944	25.6596	GONE	40.0466	27.686			U	11.9586	4.5	174.364	440.139	144	-0.03639	0.04445	-0.00014	-2e-05	0.138684	-1.00116	0.582817	0.246882	-0.84612
EMSC-20140524_0000054	GR	40.2944	25.6596	UKOP	41.1288	26.6322			U	11.9586	4.5	123.806	342.022	67	0.00357	-0.01594	0	0	0.799717	-0.412979	1.30435	0.496834	-0.424512
EMSC-20140524_0000068	GR	40.247	25.1835	ALNA	39.148	23.8667			U	7.1142	4.2	166.204	604.69	8	0.03835	-0.03635	-5e-05	-6e-05	-1.75273	-2.73506	-1.34684	-1.28173	-2.51601
EMSC-20140524_0000068	GR	40.247	25.1835	EFSA	39.5401	24.9886			U	7.1142	4.2	80.3369	477.937	20	-0.02705	0.04364	-2e-05	-7e-05	-0.837465	-1.92747	-0.475362	-0.778255	-1.88947
EMSC-20140524_0000068	GR	40.247	25.1835	KVLA	40.937	24.3859			U	7.1142	4.2	102.091	748.058	74	0.06768	-0.09968	-0.0001	-0.00014	-0.776535	-1.94767	-0.54686	-1.03795	-1.92707
EMSC-20140524_0000068	GR	40.247	25.1835	KYMI	38.6331	24.1001			U	7.1142	4.2	202.13	703.927	266	0.09836	0.01122	5e-05	4e-05	-2.08383	-2.99594	-1.6196	-1.88224	-2.59758
EMSC-20140524_0000068	GR	40.247	25.1835	LIA	39.8972	25.1806			U	7.1142	4.2	38.8912	464.17	45	0.04683	-0.0177	-3e-05	-1e-05	-0.243051	-1.7141	-0.195478	-0.717156	-1.75119
EMSC-20140524_0000068	GR	40.247	25.1835	PRK	39.2456	26.265			U	7.1142	4.2	144.728	439.853	104	-0.02311	-0.00716	4e-05	3e-05	-0.881519	-2.06109	-0.383249	-0.996543	-2.07534
EMSC-20140524_0000068	GR	40.247	25.1835	SMTH	40.4709	25.5304			U	7.1142	4.2	38.5261	900	356	-0.27133	-0.01567	-0.00034	0.00014	0.248445	-1.55399	-0.108207	-1.21059	-2.10751
EMSC-20140524_0000068	GR	40.247	25.1835	GONE	40.0466	27.686			U	7.1142	4.2	213.861	440.139	144	-0.03639	0.04445	-0.00014	-2e-05	-0.516842	-1.68751	-0.179001	-0.434502	-1.61294
EMSC-20140524_0000068	GR	40.247	25.1835	UKOP	41.1288	26.6322			U	7.1142	4.2	156.631	342.022	67	0.00357	-0.01594	0	0	0.00563451	-1.32303	0.457295	-0.358768	-1.38333
EMSC-20140524_0000106	TR	40.45	25.96	EFSA	39.5401	24.9886			SS	10	4.5	130.698	477.937	20	-0.02705	0.04364	-2e-05	-7e-05	-0.345296	-1.46649	0.0494699	-0.373176	-1.16985
EMSC-20140524_0000106	TR	40.45	25.96	KVLA	40.937	24.3859			SS	10	4.5	143.332	748.058	74	0.06768	-0.09968	-0.0001	-0.00014	-0.722054	-1.86513	-0.299079	-0.964875	-1.68674
EMSC-20140524_0000106	TR	40.45	25.96	LIA	39.8972	25.1806			SS	10	4.5	90.3508	464.17	45	0.04683	-0.0177	-3e-05	-1e-05	-0.117771	-1.31099	0.288494	-0.393125	-1.352
EMSC-20140524_0000106	TR	40.45	25.96	PLG	40.3733	23.4444			SS	10	4.5	213.143	493.142	535	-0.05298	-0.01891	-1e-05	-1e-05	-1.00832	-2.04184	-0.445798	-0.885574	-1.83028
EMSC-20140524_0000106	TR	40.45	25.96	PRK	39.2456	26.265			SS	10	4.5	136.425	439.853	104	-0.02311	-0.00716	4e-05	3e-05	-0.472144	-1.59867	-0.0983965	-0.379962	-1.30437
EMSC-20140524_0000106	TR	40.45	25.96	PSRA	38.5398	25.562			SS	10	4.5	215.134	600	11	-0.00241	-0.0154	5e-05	-2e-05	-0.945634	-2.25114	-0.625624	-1.24766	-2.0608
EMSC-20140524_0000106	TR	40.45	25.96	SMTH	40.4709	25.5304			SS	10	4.5	36.4157	900	356	-0.27133	-0.01567	-0.00034	0.00014	0.161104	-1.24821	0.390879	-0.591875	-1.12558
EMSC-20140524_0000106	TR	40.45	25.96	GONE	40.0466	27.686			SS	10	4.5	153.196	440.139	144	-0.03639	0.04445	-0.00014	-2e-05	-0.065845	-0.985147	0.233103	0.12606	-0.475295
EMSC-20140524_0000106	TR	40.45	25.96	UKOP	41.1288	26.6322			SS	10	4.5	94.3371	342.022	67	0.00357	-0.01594	0	0	0.355509	-0.587852	0.757588	0.621256	-0.306584
EMSC-20140524_0000108	TR	40.3816	26.1081	EFSA	39.5401	24.9886			U	13.9883	4	133.63	477.937	20	-0.02705	0.04364	-2e-05	-7e-05	-0.811688	-2.20261	-0.613213	-1.15017	-2.26948
EMSC-20140524_0000108	TR	40.3816	26.1081	LIA	39.8972	25.1806			U	13.9883	4	95.4848	464.17	45	0.04683	-0.0177	-3e-05	-1e-05	-0.422077	-2.01041	-0.530591	-1.17823	-2.32602
EMSC-20140524_0000108	TR	40.3816	26.1081	PRK	39.2456	26.265			U	13.9883	4	127.021	439.853	104	-0.02311	-0.00716	4e-05	3e-05	-0.407082	-1.54212	0.109716	-0.493777	-1.76127
EMSC-20140524_0000108	TR	40.3816	26.1081	SMTH	40.4709	25.5304			U	13.9883	4	49.8947	900	356	-0.27133	-0.01567	-0.00034	0.00014	0.463464	-1.42672	-0.292913	-1.30963	-2.07898
EMSC-20140524_0000108	TR	40.3816	26.1081	GONE	40.0466	27.686			U	13.9883	4	139.063	440.139	144	-0.03639	0.04445	-0.00014	-2e-05	-0.185733	-1.52186	0.249564	-0.636545	-1.75823
EMSC-20140524_0000108	TR	40.3816	26.1081	UKOP	41.1288	26.6322			U	13.9883	4	94.0841	342.022	67	0.00357	-0.01594	0	0	0.276744	-1.05174	0.549511	-0.211421	-1.35068
EMSC-20140524_0000132	GR	40.0243	24.354	ALNA	39.148	23.8667			SS	4.1998	4.5	106.007	604.69	8	0.03835	-0.03635	-5e-05	-6e-05	-0.487672	-1.57104	-0.136608	-0.19236	-1.46551
EMSC-20140524_0000132	GR	40.0243	24.354	DION	38.0779	23.9331			SS	4.1998	4.5	219.456	688.95	411	0.01094	0.09892	-3e-05	-0.00012	-1.1907	-2.20518	-0.78931	-1.16627	-1.86172
EMSC-20140524_0000132	GR	40.0243	24.354	EFSA	39.5401	24.9886			SS	4.1998	4.5	76.4142	477.937	20	-0.02705	0.04364	-2e-05	-7e-05	-0.100143	-1.31453	0.163696	-0.29021	-1.50049
EMSC-20140524_0000132	GR	40.0243	24.354	KVLA	40.937	24.3859			SS	4.1998	4.5	101.528	748.058	74	0.06768	-0.09968	-0.0001	-0.00014	0.122666	-1.06496	0.453652	-0.163585	-1.17155
EMSC-20140524_0000132	GR	40.0243	24.354	KYMI	38.6331	24.1001			SS	4.1998	4.5	156.222	703.927	266	0.09836	0.01122	5e-05	4e-05	-0.985792	-2.12683	-0.62661	-0.963961	-1.843
EMSC-20140524_0000132	GR	40.0243	24.354	LIA	39.8972	25.1806			SS	4.1998	4.5	71.8485	464.17	45	0.04683	-0.0177	-3e-05	-1e-05	0.351262	-1.05008	0.762534	-0.212268	-1.37364
EMSC-20140524_0000132	GR	40.0243	24.354	PLG	40.3733	23.4444			SS	4.1998	4.5	86.4493	493.142	535	-0.05298	-0.01891	-1e-05	-1e-05	-0.467381	-1.65081	-0.100668	-0.597482	-1.57455
EMSC-20140524_0000132	GR	40.0243	24.354	PRK	39.2456	26.265			SS	4.1998	4.5	185.132	439.853	104	-0.02311	-0.00716	4e-05	3e-05	-0.841588	-1.84171	-0.361768	-0.678565	-1.79875
EMSC-20140524_0000132	GR	40.0243	24.354	PSRA	38.5398	25.562			SS	4.1998	4.5	195.082	600	11	-0.00241	-0.0154	5e-05	-2e-05	-1.19654	-2.39541	-0.700286	-1.24204	-2.25152
EMSC-20140524_0000132	GR	40.0243	24.354	SMTH	40.4709	25.5304			SS	4.1998	4.5	111.514	900	356	-0.27133	-0.01567	-0.00034	0.00014	-0.147496	-1.55045	0.156981	-0.720807	-1.7245
EMSC-20140524_0000132	GR	40.0243	24.354	UKOP	41.1288	26.6322			SS	4.1998	4.5	228.252	342.022	67	0.00357	-0.01594	0	0	-0.476062	-1.62131	0.0163379	-0.656998	-1.6432
EMSC-20140524_0000138	GR	40.0204	24.3603	ALNA	39.148	23.8667			U	6.0843	4.1	105.824	604.69	8	0.03835	-0.03635	-5e-05	-6e-05	-1.02078	-2.20228	-0.544705	-1.0843	-2.22867
EMSC-20140524_0000138	GR	40.0204	24.3603	DION	38.0779	23.9331			U	6.0843	4.1	219.119	688.95	411	0.01094	0.09892	-3e-05	-0.00012	-1.70464	-2.86337	-1.20009	-1.88257	-2.81985
EMSC-20140524_0000138	GR	40.0204	24.3603	EFSA	39.5401	24.9886			U	6.0843	4.1	75.7277	477.937	20	-0.02705	0.04364	-2e-05	-7e-05	-0.60957	-1.726	-0.218727	-0.854027	-1.94773
EMSC-20140524_0000138	GR	40.0204	24.3603	KVLA	40.937	24.3859			U	6.0843	4.1	101.949	748.058	74	0.06768	-0.09968	-0.0001	-0.00014	-0.29697	-1.60736	0.216164	-0.774003	-1.82996
EMSC-20140524_0000138	GR	40.0204	24.3603	KYMI	38.6331	24.1001			U	6.0843	4.1	155.87	703.927	266	0.09836	0.01122	5e-05	4e-05	-1.43254	-2.68905	-0.955111	-1.73692	-2.75958
EMSC-20140524_0000138	GR	40.0204	24.3603	PLG	40.3733	23.4444			U	6.0843	4.1	87.1242	493.142	535	-0.05298	-0.01891	-1e-05	-1e-05	-0.679247	-2.08535	-0.493719	-1.16666	-2.3038
EMSC-20140524_0000138	GR	40.0204	24.3603	PRK	39.2456	26.265			U	6.0843	4.1	184.457	439.853	104	-0.02311	-0.00716	4e-05	3e-05	-1.35065	-2.51964	-0.739721	-1.38469	-2.4819
EMSC-20140524_0000180	GR	40.0115	24.3718	ALNA	39.148	23.8667			U	7.7324	4	105.32	604.69	8	0.03835	-0.03635	-5e-05	-6e-05	-1.0637	-2.16586	-0.556554	-0.882372	-2.11552
EMSC-20140524_0000180	GR	40.0115	24.3718	DION	38.0779	23.9331			U	7.7324	4	218.314	688.95	411	0.01094	0.09892	-3e-05	-0.00012	-1.83156	-2.86981	-1.18466	-1.71839	-2.64048
EMSC-20140524_0000180	GR	40.0115	24.3718	EFSA	39.5401	24.9886			U	7.7324	4	74.3355	477.937	20	-0.02705	0.04364	-2e-05	-7e-05	-1.03336	-2.201	-0.707645	-1.13369	-2.17715
EMSC-20140524_0000180	GR	40.0115	24.3718	KVLA	40.937	24.3859			U	7.7324	4	102.922	748.058	74	0.06768	-0.09968	-0.0001	-0.00014	-0.394092	-1.53814	-0.0419559	-0.656694	-1.71396
EMSC-20140524_0000180	GR	40.0115	24.3718	KYMI	38.6331	24.1001			U	7.7324	4	155.037	703.927	266	0.09836	0.01122	5e-05	4e-05	-1.56293	-2.70973	-1.05142	-1.64708	-2.43535
EMSC-20140524_0000180	GR	40.0115	24.3718	LIA	39.8972	25.1806			U	7.7324	4	70.0961	464.17	45	0.04683	-0.0177	-3e-05	-1e-05	-0.354146	-1.93045	-0.294418	-1.0388	-2.16972
EMSC-20140524_0000180	GR	40.0115	24.3718	PLG	40.3733	23.4444			U	7.7324	4	88.4476	493.142	535	-0.05298	-0.01891	-1e-05	-1e-05	-0.602067	-1.90127	-0.167806	-0.959439	-1.99948
EMSC-20140524_0000187	TR	40.3996	25.9374	EFSA	39.5401	24.9886			U	11.4846	4.2	125.178	477.937	20	-0.02705	0.04364	-2e-05	-7e-05	-0.915013	-1.97539	-0.762427	-0.875967	-1.74486
EMSC-20140524_0000187	TR	40.3996	25.9374	LIA	39.8972	25.1806			U	11.4846	4.2	85.1952	464.17	45	0.04683	-0.0177	-3e-05	-1e-05	-0.563937	-2.02082	-0.726353	-0.925104	-2.00192
EMSC-20140524_0000187	TR	40.3996	25.9374	PRK	39.2456	26.265			U	11.4846	4.2	131.328	439.853	104	-0.02311	-0.00716	4e-05	3e-05	-0.78601	-1.92651	-0.289395	-0.626166	-1.89271
EMSC-20140524_0000187	TR	40.3996	25.9374	SMTH	40.4709	25.5304			U	11.4846	4.2	35.3438	900	356	-0.27133	-0.01567	-0.00034	0.00014	0.184207	-1.64695	-0.402524	-1.1607	-1.86288
EMSC-20140524_0000187	TR	40.3996	25.9374	GONE	40.0466	27.686			U	11.4846	4.2	153.557	440.139	144	-0.03639	0.04445	-0.00014	-2e-05	-0.00592162	-1.17907	0.546371	-0.128152	-1.35771
EMSC-20140525_0000001	GR	40.0294	24.3285	ALNA	39.148	23.8667			SS	7.5382	4.3	105.69	604.69	8	0.03835	-0.03635	-5e-05	-6e-05	-0.435627	-1.5333	-0.0341066	-0.149137	-1.3726
EMSC-20140525_0000001	GR	40.0294	24.3285	DION	38.0779	23.9331			SS	7.5382	4.3	219.662	688.95	411	0.01094	0.09892	-3e-05	-0.00012	-1.22162	-2.21413	-0.794229	-1.07293	-1.84413
EMSC-20140525_0000001	GR	40.0294	24.3285	EFSA	39.5401	24.9886			SS	7.5382	4.3	78.3668	477.937	20	-0.02705	0.04364	-2e-05	-7e-05	-0.230184	-1.38045	0.146036	-0.286583	-1.45253
EMSC-20140525_0000001	GR	40.0294	24.3285	KVLA	40.937	24.3859			SS	7.5382	4.3	101.042	748.058	74	0.06768	-0.09968	-0.0001	-0.00014	0.149092	-1.06724	0.736659	-0.201215	-1.20124
EMSC-20140525_0000001	GR	40.0294	24.3285	LIA	39.8972	25.1806			SS	7.5382	4.3	74.0883	464.17	45	0.04683	-0.0177	-3e-05	-1e-05	0.21473	-1.0398	0.447765	-0.20338	-1.34867
EMSC-20140525_0000001	GR	40.0294	24.3285	PLG	40.3733	23.4444			SS	7.5382	4.3	84.2582	493.142	535	-0.05298	-0.01891	-1e-05	-1e-05	-0.0511858	-1.41503	0.201673	-0.451661	-1.51258
EMSC-20140525_0000001	GR	40.0294	24.3285	PRK	39.2456	26.265			SS	7.5382	4.3	187.323	439.853	104	-0.02311	-0.00716	4e-05	3e-05	-1.08828	-2.05068	-0.64064	-0.771772	-1.73055
EMSC-20140525_0000001	GR	40.0294	24.3285	PSRA	38.5398	25.562			SS	7.5382	4.3	196.735	600	11	-0.00241	-0.0154	5e-05	-2e-05	-1.12409	-2.40497	-0.535258	-1.26072	-2.13344
EMSC-20140525_0000001	GR	40.0294	24.3285	SMTH	40.4709	25.5304			SS	7.5382	4.3	113.206	900	356	-0.27133	-0.01567	-0.00034	0.00014	-0.404094	-1.81204	-0.275663	-0.945771	-1.77495
EMSC-20140525_0000068	TR	40.4169	26.15	EFSA	39.5401	24.9886			SS	11.2097	4.8	138.91	477.937	20	-0.02705	0.04364	-2e-05	-7e-05	-0.364172	-1.60156	0.161599	-0.49081	-1.26988
EMSC-20140525_0000068	TR	40.4169	26.15	KVLA	40.937	24.3859			SS	11.2097	4.8	159.609	748.058	74	0.06768	-0.09968	-0.0001	-0.00014	-0.631422	-2.00924	-0.241268	-1.14713	-1.9417
EMSC-20140525_0000068	TR	40.4169	26.15	LIA	39.8972	25.1806			SS	11.2097	4.8	100.63	464.17	45	0.04683	-0.0177	-3e-05	-1e-05	0.0489104	-1.34584	0.387004	-0.29231	-1.47086
EMSC-20140525_0000068	TR	40.4169	26.15	PRK	39.2456	26.265			SS	11.2097	4.8	130.607	439.853	104	-0.02311	-0.00716	4e-05	3e-05	0.253634	-0.740753	0.431511	0.461921	-0.713079
EMSC-20140525_0000068	TR	40.4169	26.15	PSRA	38.5398	25.562			SS	11.2097	4.8	214.739	600	11	-0.00241	-0.0154	5e-05	-2e-05	-0.383371	-1.78769	-0.143113	-1.01339	-1.93109
EMSC-20140525_0000068	TR	40.4169	26.15	SMTH	40.4709	25.5304			SS	11.2097	4.8	52.7719	900	356	-0.27133	-0.01567	-0.00034	0.00014	0.828249	-0.924943	0.633636	-0.537661	-1.28632
EMSC-20140525_0000068	TR	40.4169	26.15	GONE	40.0466	27.686			SS	11.2097	4.8	136.736	440.139	144	-0.03639	0.04445	-0.00014	-2e-05	0.722469	-0.345137	1.15969	0.871554	-0.132132
EMSC-20140525_0000068	TR	40.4169	26.15	KRBN	38.5936	26.5537			SS	11.2097	4.8	205.678	843.228	94	0.08041	0.05121	1e-05	8e-05	0.343508	-0.779808	0.668359	0.341552	-0.606828
EMSC-20140525_0000068	TR	40.4169	26.15	UKOP	41.1288	26.6322			SS	11.2097	4.8	88.9661	342.022	67	0.00357	-0.01594	0	0	1.12034	-0.164458	1.54337	0.668753	-0.235274
EMSC-20140525_0000070	TR	40.3926	26.1014	EFSA	39.5401	24.9886			U	8.2495	4.5	134.079	477.937	20	-0.02705	0.04364	-2e-05	-7e-05	-0.850356	-2.03366	-0.341243	-0.948699	-1.67882
EMSC-20140525_0000070	TR	40.3926	26.1014	KVLA	40.937	24.3859			U	8.2495	4.5	156.844	748.058	74	0.06768	-0.09968	-0.0001	-0.00014	-1.08265	-2.44626	-0.640591	-1.58105	-2.3574
EMSC-20140525_0000070	TR	40.3926	26.1014	LIA	39.8972	25.1806			U	8.2495	4.5	95.7084	464.17	45	0.04683	-0.0177	-3e-05	-1e-05	-0.548641	-1.7374	-0.129928	-0.858457	-1.79676
EMSC-20140525_0000070	TR	40.3926	26.1014	PRK	39.2456	26.265			U	8.2495	4.5	128.298	439.853	104	-0.02311	-0.00716	4e-05	3e-05	-0.361611	-1.40541	0.0784775	-0.12231	-1.40405
EMSC-20140525_0000070	TR	40.3926	26.1014	PSRA	38.5398	25.562			U	8.2495	4.5	211.162	600	11	-0.00241	-0.0154	5e-05	-2e-05	-1.09998	-2.49865	-0.703281	-1.59111	-2.55479
EMSC-20140525_0000070	TR	40.3926	26.1014	SMTH	40.4709	25.5304			U	8.2495	4.5	49.1035	900	356	-0.27133	-0.01567	-0.00034	0.00014	0.201398	-1.40921	0.249401	-0.987594	-1.66292
EMSC-20140525_0000070	TR	40.3926	26.1014	GONE	40.0466	27.686			U	8.2495	4.5	139.932	440.139	144	-0.03639	0.04445	-0.00014	-2e-05	0.206133	-0.969175	0.708915	0.0881654	-0.917348
EMSC-20140525_0000070	TR	40.3926	26.1014	UKOP	41.1288	26.6322			U	8.2495	4.5	93.2731	342.022	67	0.00357	-0.01594	0	0	0.559131	-0.721938	1.04658	0.189072	-0.909606
EMSC-20140526_0000092	GR	40.2082	25.1743	ALNA	39.148	23.8667			U	8.9697	4.1	162.537	604.69	8	0.03835	-0.03635	-5e-05	-6e-05	-1.73468	-2.66212	-1.32818	-1.21345	-2.44046
EMSC-20140526_0000092	GR	40.2082	25.1743	EFSA	39.5401	24.9886			U	8.9697	4.1	75.9545	477.937	20	-0.02705	0.04364	-2e-05	-7e-05	-0.607971	-1.86404	-0.28776	-0.694281	-1.82916
EMSC-20140526_0000092	GR	40.2082	25.1743	KVLA	40.937	24.3859			U	8.9697	4.1	104.89	748.058	74	0.06768	-0.09968	-0.0001	-0.00014	-0.725051	-1.95256	-0.628086	-1.01105	-1.90684
EMSC-20140526_0000092	GR	40.2082	25.1743	KYMI	38.6331	24.1001			U	8.9697	4.1	197.952	703.927	266	0.09836	0.01122	5e-05	4e-05	-2.02398	-2.94735	-1.58578	-1.79808	-2.55911
EMSC-20140526_0000092	GR	40.2082	25.1743	LIA	39.8972	25.1806			U	8.9697	4.1	34.5802	464.17	45	0.04683	-0.0177	-3e-05	-1e-05	-0.0440676	-1.52855	0.0132588	-0.615049	-1.65085
EMSC-20140526_0000092	GR	40.2082	25.1743	PLG	40.3733	23.4444			U	8.9697	4.1	147.863	493.142	535	-0.05298	-0.01891	-1e-05	-1e-05	-1.62255	-2.81101	-1.27173	-1.6484	-2.34608
EMSC-20140526_0000092	GR	40.2082	25.1743	PRK	39.2456	26.265			U	8.9697	4.1	141.969	439.853	104	-0.02311	-0.00716	4e-05	3e-05	-0.815428	-1.97359	-0.318345	-0.947519	-2.09829
EMSC-20140526_0000092	GR	40.2082	25.1743	SMTH	40.4709	25.5304			U	8.9697	4.1	42.0083	900	356	-0.27133	-0.01567	-0.00034	0.00014	0.184703	-1.66486	-0.0790842	-1.20919	-2.16256
EMSC-20140526_0000092	GR	40.2082	25.1743	GONE	40.0466	27.686			U	8.9697	4.1	214.295	440.139	144	-0.03639	0.04445	-0.00014	-2e-05	-0.520658	-1.66147	-0.223685	-0.390752	-1.46941
EMSC-20140526_0000092	GR	40.2082	25.1743	UKOP	41.1288	26.6322			U	8.9697	4.1	159.989	342.022	67	0.00357	-0.01594	0	0	-0.0475175	-1.35717	0.428016	-0.3166	-1.26355
EMSC-20140527_0000001	TR	38.8612	43.5497	ERCV	39.0198	43.3381			U	13.4679	4.3	25.4151	343.689	1668	-0.01091	-0.00365	-2e-05	1e-05	1.78114	0.42446	2.13911	1.38039	0.565431
EMSC-20140528_0000001	TR	40.4939	42.3534	CHAY	41.0918	40.7253			U	2.9253	4.3	152.329	600	4	-0.04339	0.03012	-9e-05	-3e-05	0.0892083	-1.12727	0.470354	-0.0631804	-0.943347
EMSC-20140528_0000001	TR	40.4939	42.3534	ERCV	39.0198	43.3381			U	2.9253	4.3	184.259	343.689	1668	-0.01091	-0.00365	-2e-05	1e-05	-0.195084	-1.4019	-0.325586	-0.324842	-0.758587
EMSC-20140528_0000001	TR	40.4939	42.3534	HOPA	41.3867	41.4458			U	2.9253	4.3	125.167	588.048	78	0.01148	-0.00162	-1e-05	-0.00024	0.504282	-0.930684	0.691817	-0.174217	-1.27732
EMSC-20140528_0000015	TR	40.42	26.08	EFSA	39.5401	24.9886			NF	10	4.1	134.974	477.937	20	-0.02705	0.04364	-2e-05	-7e-05	-0.498265	-1.62491	-0.184327	-0.545916	-1.49036
EMSC-20140528_0000015	TR	40.42	26.08	KVLA	40.937	24.3859			NF	10	4.1	153.99	748.058	74	0.06768	-0.09968	-0.0001	-0.00014	-1.14677	-2.51173	-0.635869	-1.49961	-2.51894
EMSC-20140528_0000015	TR	40.42	26.08	LIA	39.8972	25.1806			NF	10	4.1	96.0272	464.17	45	0.04683	-0.0177	-3e-05	-1e-05	-0.259021	-1.70653	-0.199208	-0.63828	-1.79011
EMSC-20140528_0000015	TR	40.42	26.08	PRK	39.2456	26.265			NF	10	4.1	131.534	439.853	104	-0.02311	-0.00716	4e-05	3e-05	0.188111	-0.843077	0.545337	0.186559	-1.05625
EMSC-20140528_0000015	TR	40.42	26.08	PSRA	38.5398	25.562			NF	10	4.1	213.744	600	11	-0.00241	-0.0154	5e-05	-2e-05	-0.924936	-2.14044	-0.540921	-1.18857	-2.24897
EMSC-20140528_0000015	TR	40.42	26.08	SMTH	40.4709	25.5304			NF	10	4.1	46.8476	900	356	-0.27133	-0.01567	-0.00034	0.00014	0.3138	-1.46934	0.154872	-1.09933	-1.89163
EMSC-20140528_0000015	TR	40.42	26.08	GONE	40.0466	27.686			NF	10	4.1	142.511	440.139	144	-0.03639	0.04445	-0.00014	-2e-05	0.35605	-0.998584	0.796043	-0.0505067	-1.17298
EMSC-20140528_0000015	TR	40.42	26.08	KRBN	38.5936	26.5537			NF	10	4.1	207.112	843.228	94	0.08041	0.05121	1e-05	8e-05	0.00947628	-1.07663	0.45046	0.067322	-1.16691
EMSC-20140528_0000015	TR	40.42	26.08	UKOP	41.1288	26.6322			NF	10	4.1	91.5087	342.022	67	0.00357	-0.01594	0	0	0.500137	-0.806179	0.961156	0.0962213	-1.03958
EMSC-20140529_0000018	GR	40.0532	24.4259	DION	38.0779	23.9331			U	7.0111	4	223.721	688.95	411	0.01094	0.09892	-3e-05	-0.00012	-1.20992	-2.46731	-0.643157	-1.42082	-2.55789
EMSC-20140529_0000018	GR	40.0532	24.4259	EFSA	39.5401	24.9886			U	7.0111	4	74.6047	477.937	20	-0.02705	0.04364	-2e-05	-7e-05	-0.219385	-1.50905	0.20302	-0.483137	-1.72604
EMSC-20140529_0000018	GR	40.0532	24.4259	KVLA	40.937	24.3859			U	7.0111	4	98.3367	748.058	74	0.06768	-0.09968	-0.0001	-0.00014	-0.188143	-1.49954	0.147268	-0.847036	-1.97819
EMSC-20140529_0000018	GR	40.0532	24.4259	KYMI	38.6331	24.1001			U	7.0111	4	160.368	703.927	266	0.09836	0.01122	5e-05	4e-05	-0.802096	-2.08754	-0.394928	-1.34256	-2.20816
EMSC-20140529_0000018	GR	40.0532	24.4259	LIA	39.8972	25.1806			U	7.0111	4	66.6015	464.17	45	0.04683	-0.0177	-3e-05	-1e-05	-0.361674	-1.73163	0.028366	-0.911123	-2.08433
EMSC-20140529_0000018	GR	40.0532	24.4259	PLG	40.3733	23.4444			U	7.0111	4	90.6212	493.142	535	-0.05298	-0.01891	-1e-05	-1e-05	-0.628226	-2.15498	-0.507018	-1.22523	-2.22918
EMSC-20140529_0000018	GR	40.0532	24.4259	PRK	39.2456	26.265			U	7.0111	4	181.255	439.853	104	-0.02311	-0.00716	4e-05	3e-05	-1.22312	-2.34476	-0.650767	-1.09417	-2.34752
EMSC-20140529_0000018	GR	40.0532	24.4259	SMTH	40.4709	25.5304			U	7.0111	4	104.602	900	356	-0.27133	-0.01567	-0.00034	0.00014	-0.812906	-2.10336	-0.486366	-1.29949	-2.17514
EMSC-20140601_0000050	GR	34.5946	24.6083	IMMV	35.4599	23.9802			NF	24.3475	4.7	111.93	795.072	188	-0.02677	0.13844	6e-05	-0.00015	0.0873761	-0.957738	0.632702	0.309086	-0.826871
EMSC-20140601_0000050	GR	34.5946	24.6083	ANKY	35.867	23.3012			NF	24.3475	4.7	184.697	619.572	100	-0.0098	0.05556	-0.00012	-3e-05	-0.670942	-1.64311	-0.354769	-0.405215	-1.18311
EMSC-20140601_0000050	GR	34.5946	24.6083	GVD	34.8391	24.0874			NF	24.3475	4.7	54.8294	669.155	186	0.07511	0.04868	-4e-05	1e-05	0.673291	-0.599178	1.19968	0.145427	-0.659743
EMSC-20140601_0000050	GR	34.5946	24.6083	IACM	35.3058	25.0709			NF	24.3475	4.7	89.6186	395.328	66	-0.00016	0.02528	-0.00012	-1e-05	0.765709	-0.321696	1.38657	0.984963	-0.475658
EMSC-20140601_0000050	GR	34.5946	24.6083	IMMV	35.4599	23.9802			NF	24.3475	4.7	111.93	795.072	188	-0.02677	0.13844	6e-05	-0.00015	0.0784217	-0.967077	0.623807	0.30018	-0.836668
EMSC-20140601_0000050	GR	34.5946	24.6083	ZKR	35.1147	26.217			NF	24.3475	4.7	157.768	745.462	201	0.10514	-0.01014	-0.00019	-4e-05	-0.535449	-1.52348	-0.0548628	-0.273645	-1.32488
EMSC-20140606_0000044	GR	39.16	23.7004	ALNA	39.148	23.8667			NF	11.4155	4.2	14.4001	604.69	8	0.03835	-0.03635	-5e-05	-6e-05	1.08215	-0.330107	1.35563	0.382119	-0.62935
EMSC-20140606_0000044	GR	39.16	23.7004	DION	38.0779	23.9331			NF	11.4155	4.2	122.005	688.95	411	0.01094	0.09892	-3e-05	-0.00012	-0.118232	-1.40984	0.368789	-0.573617	-1.68258
EMSC-20140606_0000044	GR	39.16	23.7004	DLFA	38.4784	22.4956			NF	11.4155	4.2	128.989	900	511	-0.01822	-0.37187	0.00018	-0.00012	-0.796469	-2.04417	-0.385713	-0.979377	-2.01661
EMSC-20140606_0000044	GR	39.16	23.7004	EFSA	39.5401	24.9886			NF	11.4155	4.2	118.56	477.937	20	-0.02705	0.04364	-2e-05	-7e-05	-0.506668	-1.70963	-0.0061109	-0.605615	-1.60269
EMSC-20140606_0000044	GR	39.16	23.7004	KVLA	40.937	24.3859			NF	11.4155	4.2	206.031	748.058	74	0.06768	-0.09968	-0.0001	-0.00014	-1.30631	-2.4998	-0.755624	-1.43868	-2.40708
EMSC-20140606_0000044	GR	39.16	23.7004	KYMI	38.6331	24.1001			NF	11.4155	4.2	68.0346	703.927	266	0.09836	0.01122	5e-05	4e-05	0.12088	-1.15309	0.545656	-0.38187	-1.44235
EMSC-20140606_0000044	GR	39.16	23.7004	LIA	39.8972	25.1806			NF	11.4155	4.2	151.111	464.17	45	0.04683	-0.0177	-3e-05	-1e-05	-0.608641	-1.84074	-0.0456699	-0.982349	-1.99791
EMSC-20140606_0000044	GR	39.16	23.7004	NOAC	37.9738	23.7177			NF	11.4155	4.2	131.904	434.005	96	-0.02322	0.00027	5e-05	6e-05	-0.152559	-1.45604	0.274586	-0.764701	-1.70631
EMSC-20140606_0000044	GR	39.16	23.7004	PLG	40.3733	23.4444			NF	11.4155	4.2	136.673	493.142	535	-0.05298	-0.01891	-1e-05	-1e-05	-0.712211	-2.08903	-0.299019	-1.23581	-2.34364
EMSC-20140606_0000044	GR	39.16	23.7004	PRK	39.2456	26.265			NF	11.4155	4.2	221.179	439.853	104	-0.02311	-0.00716	4e-05	3e-05	-1.24134	-2.15545	-0.877039	-0.942766	-2.17905
EMSC-20140606_0000044	GR	39.16	23.7004	PSRA	38.5398	25.562			NF	11.4155	4.2	175.339	600	11	-0.00241	-0.0154	5e-05	-2e-05	-1.04862	-2.38022	-0.630217	-1.56296	-2.41275
EMSC-20140606_0000044	GR	39.16	23.7004	SMTH	40.4709	25.5304			NF	11.4155	4.2	213.719	900	356	-0.27133	-0.01567	-0.00034	0.00014	-1.2659	-2.54886	-0.821063	-1.85204	-2.70024
EMSC-20140606_0000044	GR	39.16	23.7004	TNSA	37.5394	25.1631			NF	11.4155	4.2	220.767	498.109	10	-0.00543	-0.03838	0	-6e-05	-1.11329	-2.3839	-0.717341	-1.47965	-2.22615
EMSC-20140606_0000044	GR	39.16	23.7004	YDRA	37.3495	23.4653			NF	11.4155	4.2	202.366	693.523	86	-0.04435	0.15921	8e-05	-0.0002	-0.603583	-1.92897	-0.106114	-0.861026	-2.13605
EMSC-20140606_0000048	IT	39.8997	16.091	PZUN	40.6458	15.807			NF	8.2	4	86.3903	457.664	713.756	0.06628	0.05125	-0.0017	0.00084	-1.16839	-2.26774	-0.771551	-1.25253	-1.56709
EMSC-20140606_0000048	IT	39.8997	16.091	ACER	40.7867	15.9427			NF	8.2	4	99.4274	475.367	683.913	0.15668	0.38234	0.00385	0.00305	-0.887556	-1.97456	-0.689671	-0.938931	-1.88935
EMSC-20140606_0000048	IT	39.8997	16.091	BSSO	41.5461	14.5938			NF	8.2	4	222.33	451.792	951.555	-0.10341	-0.05196	0.0008	-0.00193	-2.22019	-2.9348	-1.92987	-1.90022	-2.29292
EMSC-20140606_0000048	IT	39.8997	16.091	BULG	40.0783	15.3776			NF	8.2	4	63.9395	428.356	848.675	0.0472	0.00361	0.00366	0.00531	-0.439717	-1.82462	-0.0743217	-0.959441	-1.6444
EMSC-20140606_0000048	IT	39.8997	16.091	CAFE	41.028	15.2366			NF	8.2	4	144.791	411.579	1003.42	-0.11824	-0.01699	0.00242	0.00445	-1.57462	-2.47029	-1.191	-1.33605	-1.83059
EMSC-20140606_0000048	IT	39.8997	16.091	CAR1	39.2534	16.2114			NF	8.2	4	72.6023	419.207	628.92	0.02635	-0.18406	0.00291	0.00193	-0.501145	-1.80119	-0.131633	-0.637488	-1.8471
EMSC-20140606_0000048	IT	39.8997	16.091	CELI	39.4027	16.5088			NF	8.2	4	65.8295	494.642	1243.76	-0.0776	0.12593	0.00083	0.00178	-1.01937	-2.06236	-0.655284	-1.01118	-1.81502
EMSC-20140606_0000048	IT	39.8997	16.091	JOPP	38.6068	15.8856			NF	8.2	4	144.848	488.391	504.213	0.12262	-0.20414	0.0001	0.00077	-1.15369	-2.50928	-0.749406	-1.38292	-2.34562
EMSC-20140606_0000048	IT	39.8997	16.091	LTRZ	40.6033	16.8191			NF	8.2	4	99.6897	735.463	341.513	0.08756	0.00398	0.00223	0.00293	-1.08482	-2.44623	-0.76902	-1.21939	-2.23725
EMSC-20140606_0000048	IT	39.8997	16.091	MCEL	40.3249	15.8019			NF	8.2	4	53.29	515.868	981.452	-0.1695	0.04582	0.00339	0.00238	-0.425462	-1.8103	-0.140028	-0.825095	-1.28243
EMSC-20140606_0000048	IT	39.8997	16.091	MGR	40.1376	15.5535			NF	8.2	4	52.8661	437.095	226.831	-0.48361	-0.50782	0.01137	0.00718	-0.323986	-1.68566	0.0109444	-1.0848	-1.77378
EMSC-20140606_0000048	IT	39.8997	16.091	MOCO	41.37	15.158			NF	8.2	4	181.456	462.311	1045.69	0.10377	-0.11592	0.00298	-2e-05	-2.19361	-2.84759	-1.93711	-1.84083	-2.09121
EMSC-20140606_0000048	IT	39.8997	16.091	MRB1	41.1227	14.9681			NF	8.2	4	165.841	489.758	616.632	-0.15684	0.06437	0.00296	0.00382	-1.55062	-2.40894	-1.28082	-1.24966	-1.69635
EMSC-20140606_0000048	IT	39.8997	16.091	MRLC	40.7564	15.4889			NF	8.2	4	108.071	479.543	563.341	-0.27306	-0.12974	0.00565	0.00615	-1.38555	-2.40173	-0.983063	-1.42242	-1.98824
EMSC-20140606_0000048	IT	39.8997	16.091	MSAG	41.712	15.9096			NF	8.2	4	202.096	735.463	830.067	-0.07658	-0.05018	-0.00029	0.00095	-1.46985	-2.75704	-0.961817	-1.68063	-2.36809
EMSC-20140606_0000048	IT	39.8997	16.091	PIPA	39.4851	16.8158			NF	8.2	4	77.2738	465.276	416.482	0.14304	-0.1633	0.00539	-0.00247	-1.1008	-2.32415	-0.696064	-1.26095	-1.94477
EMSC-20140606_0000048	IT	39.8997	16.091	PLAC	38.4494	16.4383			NF	8.2	4	164.021	404.99	529.022	0.08808	0.12285	0.00468	0.00079	-1.57041	-2.49688	-1.08425	-1.27685	-2.04123
EMSC-20140606_0000048	IT	39.8997	16.091	SALB	39.8772	16.3459			NF	8.2	4	21.8913	502.345	1132.22	-0.06429	-0.23787	0.00504	0.00431	0.416879	-0.867297	0.702718	-0.228395	-0.998738
EMSC-20140606_0000048	IT	39.8997	16.091	SERS	39.0359	16.6886			NF	8.2	4	108.89	502.336	1175.69	-0.14596	0.00591	0.00236	0.00399	-1.42258	-2.30695	-0.985821	-1.0676	-1.96601
EMSC-20140606_0000048	IT	39.8997	16.091	SGTA	41.135	15.365			NF	8.2	4	150.444	454.684	654.229	0.04642	-0.09758	0.00243	-0.00081	-1.79641	-2.633	-1.38932	-1.47976	-1.905
EMSC-20140606_0000048	IT	39.8997	16.091	SIRI	40.1821	15.8675			NF	8.2	4	36.7158	429.4	1082.68	0.08837	0.02868	-0.00097	0.00514	0.0281666	-1.323	0.549737	-0.53689	-1.22658
EMSC-20140606_0000048	IT	39.8997	16.091	SNAL	40.9254	15.2091			NF	8.2	4	136.317	464.728	809.454	-0.17796	-0.13541	0.00283	0.00428	-1.35095	-2.18051	-1.15009	-0.938931	-1.75808
EMSC-20140606_0000048	IT	39.8997	16.091	T0701	39.9862	16.1161			NF	8.2	4	9.85351	484.567	897.812	-0.35231	-0.39783	0.00368	0.00639	1.54626	-0.0757954	1.66389	0.355866	-0.50306
EMSC-20140606_0000048	IT	39.8997	16.091	VULT	40.9549	15.6163			NF	8.2	4	124.022	499.014	1013.73	-0.15549	0.06989	-0.00278	0.00565	-1.34781	-2.34098	-0.933493	-1.26522	-1.84866
EMSC-20140606_0000048	IT	39.8997	16.091	CEL	38.2603	15.8939			NF	8.2	4	183.085	533.959	639.022	0.13038	-0.416	0.00255	-0.00228	-1.77924	-2.82555	-1.32634	-1.56971	-2.42833
EMSC-20140606_0000048	IT	39.8997	16.091	CUC	39.9938	15.8155			NF	8.2	4	25.7109	698.631	610.928	-0.41867	-0.12326	0.00455	-0.00275	0.021381	-1.35792	0.348891	-0.599897	-1.06491
EMSC-20140606_0000048	IT	39.8997	16.091	TIP	39.1794	16.7583			NF	8.2	4	98.4339	533.388	776.877	0.22392	0.14522	-0.00153	-0.00412	-1.64998	-2.39613	-1.43199	-1.41633	-1.85783
EMSC-20140606_0000055	GR	39.7644	24.1129	ALNA	39.148	23.8667			SS	6.8653	4.2	71.7218	604.69	8	0.03835	-0.03635	-5e-05	-6e-05	0.256156	-1.06556	0.726737	-0.195444	-1.34479
EMSC-20140606_0000055	GR	39.7644	24.1129	DION	38.0779	23.9331			SS	6.8653	4.2	188.17	688.95	411	0.01094	0.09892	-3e-05	-0.00012	-0.675838	-1.9076	-0.0928047	-0.912231	-1.94641
EMSC-20140606_0000055	GR	39.7644	24.1129	DLFA	38.4784	22.4956			SS	6.8653	4.2	199.776	900	511	-0.01822	-0.37187	0.00018	-0.00012	-1.35456	-2.55117	-0.853678	-1.33742	-2.41239
EMSC-20140606_0000055	GR	39.7644	24.1129	EFSA	39.5401	24.9886			SS	6.8653	4.2	79.0117	477.937	20	-0.02705	0.04364	-2e-05	-7e-05	-0.218284	-1.35289	0.140042	-0.415795	-1.31808
EMSC-20140606_0000055	GR	39.7644	24.1129	KVLA	40.937	24.3859			SS	6.8653	4.2	132.428	748.058	74	0.06768	-0.09968	-0.0001	-0.00014	-0.343131	-1.5624	0.152551	-0.698758	-1.7108
EMSC-20140606_0000055	GR	39.7644	24.1129	KYMI	38.6331	24.1001			SS	6.8653	4.2	125.794	703.927	266	0.09836	0.01122	5e-05	4e-05	-0.396313	-1.65884	0.061674	-0.696579	-1.7804
EMSC-20140606_0000055	GR	39.7644	24.1129	LIA	39.8972	25.1806			SS	6.8653	4.2	92.3561	464.17	45	0.04683	-0.0177	-3e-05	-1e-05	0.0536852	-1.13921	0.37531	-0.361417	-1.23117
EMSC-20140606_0000055	GR	39.7644	24.1129	NOAC	37.9738	23.7177			SS	6.8653	4.2	202.019	434.005	96	-0.02322	0.00027	5e-05	6e-05	-0.741278	-1.96921	-0.284704	-0.917905	-2.15554
EMSC-20140606_0000055	GR	39.7644	24.1129	PLG	40.3733	23.4444			SS	6.8653	4.2	88.4276	493.142	535	-0.05298	-0.01891	-1e-05	-1e-05	-0.332736	-1.7291	0.0508753	-1.16968	-2.14723
EMSC-20140606_0000055	GR	39.7644	24.1129	PRK	39.2456	26.265			SS	6.8653	4.2	193.432	439.853	104	-0.02311	-0.00716	4e-05	3e-05	-0.879133	-1.93013	-0.315333	-0.675521	-1.92459
EMSC-20140606_0000055	GR	39.7644	24.1129	PSRA	38.5398	25.562			SS	6.8653	4.2	184.809	600	11	-0.00241	-0.0154	5e-05	-2e-05	-0.845804	-2.22011	-0.404162	-1.27516	-2.49661
EMSC-20140606_0000055	GR	39.7644	24.1129	SMTH	40.4709	25.5304			SS	6.8653	4.2	143.878	900	356	-0.27133	-0.01567	-0.00034	0.00014	-1.04619	-2.39188	-0.535553	-1.45063	-2.50184
EMSC-20140608_0000042	GR	38.3613	22.1477	ALNA	39.148	23.8667			NF	10	4.41	172.83	604.69	8	0.03835	-0.03635	-5e-05	-6e-05	-1.41258	-2.2248	-1.16358	-0.949258	-2.0344
EMSC-20140608_0000042	GR	38.3613	22.1477	DION	38.0779	23.9331			NF	10	4.41	159.117	688.95	411	0.01094	0.09892	-3e-05	-0.00012	-1.31135	-2.37857	-0.869356	-1.28845	-2.03197
EMSC-20140608_0000042	GR	38.3613	22.1477	DLFA	38.4784	22.4956			NF	10	4.41	32.9887	900	511	-0.01822	-0.37187	0.00018	-0.00012	0.0669576	-1.33214	0.225762	-0.270407	-1.21585
EMSC-20140608_0000042	GR	38.3613	22.1477	ITM	37.1787	21.9252			NF	10	4.41	132.943	844.349	512	-0.01976	-0.08096	0.00025	3e-05	-0.79046	-2.02256	-0.459995	-0.755261	-1.64497
EMSC-20140608_0000042	GR	38.3613	22.1477	JAN	39.6562	20.8487			NF	10	4.41	182.553	435.911	515	0.01206	-0.02499	3e-05	1e-05	-1.2434	-2.21825	-0.905493	-1.06261	-1.80339
EMSC-20140608_0000042	GR	38.3613	22.1477	KYMI	38.6331	24.1001			NF	10	4.41	172.576	703.927	266	0.09836	0.01122	5e-05	4e-05	-1.54692	-2.53469	-1.17569	-1.35645	-2.08945
EMSC-20140608_0000042	GR	38.3613	22.1477	MGNA	38.6561	20.7912			NF	10	4.41	122.499	411.497	65	0.03929	0.00081	-1e-05	8e-05	-0.847807	-2.12452	-0.59925	-0.953207	-1.86282
EMSC-20140608_0000042	GR	38.3613	22.1477	MNVA	36.6871	23.0373			NF	10	4.41	202.017	883.644	11	0.09264	0.03325	-0.00021	-4e-05	-1.68402	-2.6165	-1.4273	-1.2732	-1.94008
EMSC-20140608_0000042	GR	38.3613	22.1477	NOAC	37.9738	23.7177			NF	10	4.41	143.851	434.005	96	-0.02322	0.00027	5e-05	6e-05	-1.13067	-2.16101	-0.623652	-1.01808	-1.81324
EMSC-20140608_0000042	GR	38.3613	22.1477	VLMS	37.8766	20.6628			NF	10	4.41	140.632	533.941	435	-0.06411	-0.00189	-3e-05	5e-05	-0.152685	-1.56302	0.262209	-0.714588	-1.82892
EMSC-20140608_0000042	GR	38.3613	22.1477	AC01	38.1662	20.5104			NF	10	4.41	144.582	600	27	-0.0344	-0.03932	2e-05	-6e-05	-0.744565	-2.0396	-0.394286	-0.859822	-2.08978
EMSC-20140608_0000042	GR	38.3613	22.1477	AC03	38.1641	20.5062			NF	10	4.41	144.982	600	6	0.00616	0.00973	-0.00012	-3e-05	-0.0267559	-1.22768	0.517081	-0.35547	-1.55407
EMSC-20140608_0000042	GR	38.3613	22.1477	AC10	38.1617	20.4966			NF	10	4.41	145.853	589.378	43	0.04382	0.03351	1e-05	-1e-05	-0.410467	-1.81247	-0.139841	-0.82958	-1.93302
EMSC-20140609_0000007	TR	36.6788	36.012	KHMN	37.3916	37.1574			NF	17.5967	4.5	128.912	272.353	599	-0.0127	0.00068	-1e-05	0	0.54517	-0.594369	1.03043	0.430759	-0.589005
EMSC-20140609_0000007	TR	36.6788	36.012	KRTD	36.5934	35.4157			NF	17.5967	4.5	54.047	362.858	24	-0.00117	-0.00581	1e-05	2e-05	0.537404	-0.553202	0.888366	0.770427	-0.138392
EMSC-20140609_0000007	TR	36.6788	36.012	NIG	38.108	34.6142			NF	17.5967	4.5	201.25	665.455	2155	0.08773	-0.06392	3e-05	0.00021	0.0441784	-0.860597	0.293988	0.21795	-0.824464
EMSC-20140609_0000007	TR	36.6788	36.012	SLFK	36.3926	33.9465			NF	17.5967	4.5	187.259	469.727	38	-0.02307	-0.0657	-1e-05	-9e-05	-0.186238	-1.52203	0.177587	-0.49494	-1.45379
EMSC-20140615_0000052	GR	40.2246	25.1665	ALNA	39.148	23.8667			U	12.2243	4.1	163.4	604.69	8	0.03835	-0.03635	-5e-05	-6e-05	-1.87557	-2.78425	-1.48882	-1.42633	-2.49789
EMSC-20140615_0000052	GR	40.2246	25.1665	EFSA	39.5401	24.9886			U	12.2243	4.1	77.6057	477.937	20	-0.02705	0.04364	-2e-05	-7e-05	-0.71196	-2.00563	-0.428555	-0.931396	-1.90621
EMSC-20140615_0000052	GR	40.2246	25.1665	KVLA	40.937	24.3859			U	12.2243	4.1	103.059	748.058	74	0.06768	-0.09968	-0.0001	-0.00014	-0.71476	-2.14911	-0.490844	-1.1955	-2.06335
EMSC-20140615_0000052	GR	40.2246	25.1665	KYMI	38.6331	24.1001			U	12.2243	4.1	199.254	703.927	266	0.09836	0.01122	5e-05	4e-05	-2.17964	-3.06425	-1.73795	-1.97966	-2.66324
EMSC-20140615_0000052	GR	40.2246	25.1665	LIA	39.8972	25.1806			U	12.2243	4.1	36.4193	464.17	45	0.04683	-0.0177	-3e-05	-1e-05	-0.137529	-1.75778	-0.11064	-0.813977	-1.7491
EMSC-20140615_0000052	GR	40.2246	25.1665	PLG	40.3733	23.4444			U	12.2243	4.1	146.973	493.142	535	-0.05298	-0.01891	-1e-05	-1e-05	-1.56643	-2.85693	-1.22182	-1.88193	-2.27554
EMSC-20140615_0000052	GR	40.2246	25.1665	PRK	39.2456	26.265			U	12.2243	4.1	143.776	439.853	104	-0.02311	-0.00716	4e-05	3e-05	-1.1074	-2.18697	-0.613581	-1.02561	-2.13162
EMSC-20140615_0000052	GR	40.2246	25.1665	PSRA	38.5398	25.562			U	12.2243	4.1	190.402	600	11	-0.00241	-0.0154	5e-05	-2e-05	-1.45684	-2.73227	-1.14544	-1.7595	-2.72114
EMSC-20140615_0000052	GR	40.2246	25.1665	SMTH	40.4709	25.5304			U	12.2243	4.1	41.2503	900	356	-0.27133	-0.01567	-0.00034	0.00014	0.0586403	-1.68051	-0.234125	-1.27869	-2.21547
EMSC-20140615_0000052	GR	40.2246	25.1665	UKOP	41.1288	26.6322			U	12.2243	4.1	159.327	342.022	67	0.00357	-0.01594	0	0	-0.0492777	-1.44369	0.310539	-0.36339	-1.29272
EMSC-20140625_0000036	GR	38.413	21.751	ALNA	39.148	23.8667			NF	16	4.22	200.774	604.69	8	0.03835	-0.03635	-5e-05	-6e-05	-1.71523	-2.74137	-1.33767	-1.46797	-2.57765
EMSC-20140625_0000036	GR	38.413	21.751	DION	38.0779	23.9331			NF	16	4.22	194.159	688.95	411	0.01094	0.09892	-3e-05	-0.00012	-1.16796	-2.31943	-0.636208	-1.31555	-2.29476
EMSC-20140625_0000036	GR	38.413	21.751	DLFA	38.4784	22.4956			NF	16	4.22	65.2541	900	511	-0.01822	-0.37187	0.00018	-0.00012	-0.556514	-1.87039	-0.271049	-0.943153	-2.16629
EMSC-20140625_0000036	GR	38.413	21.751	ITM	37.1787	21.9252			NF	16	4.22	138.097	844.349	512	-0.01976	-0.08096	0.00025	3e-05	-0.725816	-2.01143	-0.344771	-1.17839	-2.21069
EMSC-20140625_0000036	GR	38.413	21.751	JAN	39.6562	20.8487			NF	16	4.22	158.685	435.911	515	0.01206	-0.02499	3e-05	1e-05	-1.27483	-2.30394	-0.777952	-1.15709	-2.27259
EMSC-20140625_0000036	GR	38.413	21.751	KYMI	38.6331	24.1001			NF	16	4.22	205.816	703.927	266	0.09836	0.01122	5e-05	4e-05	-1.68392	-2.76603	-1.30813	-1.61141	-2.48952
EMSC-20140625_0000036	GR	38.413	21.751	MGNA	38.6561	20.7912			NF	16	4.22	87.7524	411.497	65	0.03929	0.00081	-1e-05	8e-05	-0.234769	-1.61269	-0.275293	-0.53714	-1.82248
EMSC-20140625_0000036	GR	38.413	21.751	NOAC	37.9738	23.7177			NF	16	4.22	178.668	434.005	96	-0.02322	0.00027	5e-05	6e-05	-0.981788	-2.20426	-0.541829	-0.940594	-2.13705
EMSC-20140625_0000036	GR	38.413	21.751	AC01	38.1662	20.5104			NF	16	4.22	111.697	600	27	-0.0344	-0.03932	2e-05	-6e-05	-0.105341	-1.71043	-0.117542	-1.11506	-2.11783
EMSC-20140625_0000036	GR	38.413	21.751	AC03	38.1641	20.5062			NF	16	4.22	112.111	600	6	0.00616	0.00973	-0.00012	-3e-05	0.412089	-1.0478	0.766761	-0.357739	-1.45936
EMSC-20140625_0000036	GR	38.413	21.751	AC10	38.1617	20.4966			NF	16	4.22	112.991	589.378	43	0.04382	0.03351	1e-05	-1e-05	0.00845302	-1.49618	0.0936039	-0.837709	-1.91327
EMSC-20140625_0000036	GR	38.413	21.751	AC11	38.1581	20.4904			NF	16	4.22	113.617	378.818	72	-0.06007	-0.00797	5e-05	3e-05	-0.0251535	-1.46088	0.225467	-0.889398	-1.91463
EMSC-20140626_0000065	GR	39.677	25.5924	ALNA	39.148	23.8667			U	11.7694	4.1	159.491	604.69	8	0.03835	-0.03635	-5e-05	-6e-05	-1.35885	-2.44272	-0.883023	-1.15844	-2.35665
EMSC-20140626_0000065	GR	39.677	25.5924	EFSA	39.5401	24.9886			U	11.7694	4.1	53.9139	477.937	20	-0.02705	0.04364	-2e-05	-7e-05	0.0774178	-1.4301	0.114928	-0.667955	-1.59868
EMSC-20140626_0000065	GR	39.677	25.5924	KYMI	38.6331	24.1001			U	11.7694	4.1	173.282	703.927	266	0.09836	0.01122	5e-05	4e-05	-1.39183	-2.60383	-0.827556	-1.69234	-2.62899
EMSC-20140626_0000065	GR	39.677	25.5924	LIA	39.8972	25.1806			U	11.7694	4.1	42.8738	464.17	45	0.04683	-0.0177	-3e-05	-1e-05	0.102935	-1.64825	0.154796	-0.744135	-1.89002
EMSC-20140626_0000065	GR	39.677	25.5924	PLG	40.3733	23.4444			U	11.7694	4.1	198.602	493.142	535	-0.05298	-0.01891	-1e-05	-1e-05	-1.56874	-2.90422	-1.10466	-1.66026	-2.78143
EMSC-20140626_0000065	GR	39.677	25.5924	PRK	39.2456	26.265			U	11.7694	4.1	75.0632	439.853	104	-0.02311	-0.00716	4e-05	3e-05	-0.720084	-1.91022	-0.243909	-0.922244	-2.18856
EMSC-20140626_0000065	GR	39.677	25.5924	PSRA	38.5398	25.562			U	11.7694	4.1	126.48	600	11	-0.00241	-0.0154	5e-05	-2e-05	-0.505133	-1.8551	-0.18624	-0.962509	-2.17245
EMSC-20140626_0000065	GR	39.677	25.5924	SMTH	40.4709	25.5304			U	11.7694	4.1	88.4393	900	356	-0.27133	-0.01567	-0.00034	0.00014	-0.677781	-2.08216	-0.463291	-1.22807	-2.29468
EMSC-20140626_0000065	GR	39.677	25.5924	GONE	40.0466	27.686			U	11.7694	4.1	183.354	440.139	144	-0.03639	0.04445	-0.00014	-2e-05	-0.45308	-1.5595	-0.0445094	-0.24077	-1.49116
EMSC-20140626_0000065	GR	39.677	25.5924	UKOP	41.1288	26.6322			U	11.7694	4.1	183.878	342.022	67	0.00357	-0.01594	0	0	-0.480409	-1.52902	-0.0915972	-0.399009	-1.43497
EMSC-20140627_0000056	GR	38.2193	25.117	ALNA	39.148	23.8667			SS	7.1473	4.58	149.807	604.69	8	0.03835	-0.03635	-5e-05	-6e-05	-0.614925	-1.54114	-0.347486	-0.114659	-1.25186
EMSC-20140627_0000056	GR	38.2193	25.117	AMGA	36.8316	25.8938			SS	7.1473	4.58	168.83	625.424	282	-0.01177	-0.0446	0.00022	3e-05	-0.804033	-2.04843	-0.533676	-0.957324	-1.74318
EMSC-20140627_0000056	GR	38.2193	25.117	DION	38.0779	23.9331			SS	7.1473	4.58	104.715	688.95	411	0.01094	0.09892	-3e-05	-0.00012	-0.0837766	-1.39936	0.272276	-0.3705	-1.40231
EMSC-20140627_0000056	GR	38.2193	25.117	EFSA	39.5401	24.9886			SS	7.1473	4.58	147.291	477.937	20	-0.02705	0.04364	-2e-05	-7e-05	-0.74701	-1.67105	-0.41032	-0.405944	-1.38912
EMSC-20140627_0000056	GR	38.2193	25.117	KYMI	38.6331	24.1001			SS	7.1473	4.58	99.8192	703.927	266	0.09836	0.01122	5e-05	4e-05	-0.461548	-1.53394	0.0358355	-0.587694	-1.26621
EMSC-20140627_0000056	GR	38.2193	25.117	LIA	39.8972	25.1806			SS	7.1473	4.58	186.66	464.17	45	0.04683	-0.0177	-3e-05	-1e-05	-1.03122	-1.98499	-0.578633	-0.811332	-1.79316
EMSC-20140627_0000056	GR	38.2193	25.117	NOAC	37.9738	23.7177			SS	7.1473	4.58	125.455	434.005	96	-0.02322	0.00027	5e-05	6e-05	-0.033275	-1.34256	0.273492	-0.316896	-1.27608
EMSC-20140627_0000056	GR	38.2193	25.117	PRK	39.2456	26.265			SS	7.1473	4.58	151.457	439.853	104	-0.02311	-0.00716	4e-05	3e-05	-0.607291	-1.59451	-0.114732	-0.311393	-1.35912
EMSC-20140627_0000056	GR	38.2193	25.117	PSRA	38.5398	25.562			SS	7.1473	4.58	52.675	600	11	-0.00241	-0.0154	5e-05	-2e-05	0.661023	-0.717507	0.944154	-0.0327259	-1.11077
EMSC-20140627_0000056	GR	38.2193	25.117	TNSA	37.5394	25.1631			SS	7.1473	4.58	75.7074	498.109	10	-0.00543	-0.03838	0	-6e-05	0.622982	-0.751717	0.854113	-0.205514	-1.11789
EMSC-20140627_0000056	GR	38.2193	25.117	YDRA	37.3495	23.4653			SS	7.1473	4.58	174.42	693.523	86	-0.04435	0.15921	8e-05	-0.0002	-0.369637	-1.4602	-0.0325208	-0.276733	-1.35566
EMSC-20140627_0000056	GR	38.2193	25.117	KRBN	38.5936	26.5537			SS	7.1473	4.58	131.922	843.228	94	0.08041	0.05121	1e-05	8e-05	0.329183	-0.752183	0.737345	0.617982	-0.566945
EMSC-20140703_0000014	TR	40.213	27.96	PRK	39.2456	26.265			SS	12.6446	4.48	180.497	439.853	104	-0.02311	-0.00716	4e-05	3e-05	-0.430404	-1.52369	-0.0360305	-0.360429	-1.49487
EMSC-20140703_0000014	TR	40.213	27.96	SMTH	40.4709	25.5304			SS	12.6446	4.48	207.891	900	356	-0.27133	-0.01567	-0.00034	0.00014	-0.422076	-1.58479	-0.0858152	-0.799956	-1.81338
EMSC-20140703_0000014	TR	40.213	27.96	AKS	38.8785	27.8129			SS	12.6446	4.48	148.925	541.408	331	0.04978	0.04567	0.00012	0.00025	0.328508	-0.813645	0.810848	0.0218052	-0.857206
EMSC-20140703_0000014	TR	40.213	27.96	DST	39.6041	28.6267			SS	12.6446	4.48	88.4182	480.271	695	0.01607	0.0154	-4e-05	4e-05	0.80531	-0.631075	1.26244	0.137794	-0.924627
EMSC-20140703_0000014	TR	40.213	27.96	GOMA	38.7077	27.9175			SS	12.6446	4.48	167.421	636.467	132	0.07518	0.04702	-7e-05	-4e-05	0.278132	-0.921354	0.653934	-0.0411641	-0.955997
EMSC-20140703_0000014	TR	40.213	27.96	GONE	40.0466	27.686			SS	12.6446	4.48	29.7491	440.139	144	-0.03639	0.04445	-0.00014	-2e-05	1.21937	-0.148898	1.38628	0.782896	-0.133436
EMSC-20140703_0000014	TR	40.213	27.96	KRBN	38.5936	26.5537			SS	12.6446	4.48	216.844	843.228	94	0.08041	0.05121	1e-05	8e-05	-0.183839	-1.31293	0.355708	-0.124681	-1.18567
EMSC-20140703_0000014	TR	40.213	27.96	ORLT	40.0452	28.8914			SS	12.6446	4.48	81.3548	610.21	717	0.06117	-0.07403	0.00015	1e-05	1.12884	-0.145029	1.58113	0.489323	-0.383827
EMSC-20140703_0000014	TR	40.213	27.96	OSMT	40.601	29.7			SS	12.6446	4.48	153.511	875.613	779	-0.00248	-0.17182	-0.00014	-0.0001	0.308976	-0.911729	0.911845	-0.0845318	-1.1154
EMSC-20140703_0000014	TR	40.213	27.96	SHAP	39.0231	29.222			SS	12.6446	4.48	170.849	495.541	1009	-0.00572	-0.03743	-0.00018	0	0.680676	-0.720764	1.20071	0.0613863	-1.09817
EMSC-20140703_0000014	TR	40.213	27.96	SMAA	39.1005	28.9805			SS	12.6446	4.48	151.44	274.72	799	-0.00364	0.00311	0	0	0.765389	-0.443114	1.24006	0.71965	-0.555082
EMSC-20140703_0000014	TR	40.213	27.96	UKOP	41.1288	26.6322			SS	12.6446	4.48	151.357	342.022	67	0.00357	-0.01594	0	0	0.420708	-0.60511	0.820955	0.565721	-0.541808
EMSC-20140708_0000051	GR	35.9333	23.5772	IMMV	35.4599	23.9802			U	14.9449	4.2	63.9951	795.072	188	-0.02677	0.13844	6e-05	-0.00015	0.3749	-1.08262	0.815195	-0.511698	-1.6145
EMSC-20140708_0000051	GR	35.9333	23.5772	KTHA	36.2566	23.0621			U	14.9449	4.2	58.6032	516.09	273	0.05157	-0.0442	0.00023	0.00014	0.245514	-1.2548	0.336314	-0.639926	-1.59817
EMSC-20140708_0000051	GR	35.9333	23.5772	ANKY	35.867	23.3012			U	14.9449	4.2	25.9314	619.572	100	-0.0098	0.05556	-0.00012	-3e-05	0.414674	-1.10986	0.637253	-0.612148	-1.6024
EMSC-20140708_0000051	GR	35.9333	23.5772	GVD	34.8391	24.0874			U	14.9449	4.2	130.159	669.155	186	0.07511	0.04868	-4e-05	1e-05	-0.364747	-1.71032	0.108037	-1.10096	-2.12107
EMSC-20140708_0000051	GR	35.9333	23.5772	IACM	35.3058	25.0709			U	14.9449	4.2	151.977	395.328	66	-0.00016	0.02528	-0.00012	-1e-05	-0.108992	-1.46837	0.317635	-0.181554	-1.56246
EMSC-20140708_0000051	GR	35.9333	23.5772	IMMV	35.4599	23.9802			U	14.9449	4.2	63.9951	795.072	188	-0.02677	0.13844	6e-05	-0.00015	0.366058	-1.09153	0.806307	-0.520677	-1.62392
EMSC-20140708_0000051	GR	35.9333	23.5772	ITM	37.1787	21.9252			U	14.9449	4.2	202.355	844.349	512	-0.01976	-0.08096	0.00025	3e-05	-1.73726	-2.78834	-1.38717	-1.82689	-2.47829
EMSC-20140708_0000051	GR	35.9333	23.5772	KTHA	36.2566	23.0621			U	14.9449	4.2	58.6032	516.09	273	0.05157	-0.0442	0.00023	0.00014	0.229412	-1.26514	0.327371	-0.648909	-1.61162
EMSC-20140708_0000051	GR	35.9333	23.5772	MNVA	36.6871	23.0373			U	14.9449	4.2	96.7744	883.644	11	0.09264	0.03325	-0.00021	-4e-05	-0.851011	-2.38038	-0.626003	-1.66526	-2.56239
EMSC-20140710_0000044	GR	36.4208	27.1345	KARP	35.5472	27.1612			U	12.8843	4.2	97.1696	883.296	416	0.15252	-0.10626	5e-05	0.0001	-0.75321	-2.04272	-0.571209	-0.840562	-2.0394
EMSC-20140710_0000044	GR	36.4208	27.1345	KARP	35.5471	27.1611			U	12.8843	4.2	97.1804	883.296	416	0.15252	-0.10626	5e-05	0.0001	-0.746177	-2.0549	-0.579901	-0.849628	-2.06096
EMSC-20140710_0000044	GR	36.4208	27.1345	DATC	36.7584	27.6602			U	12.8843	4.2	60.1007	436.096	82	0.02251	-0.00919	3e-05	4e-05	0.524447	-0.864046	0.936689	0.0980623	-1.12175
EMSC-20140710_0000044	GR	36.4208	27.1345	MRSB	36.7161	28.1969			U	12.8843	4.2	100.399	732.254	433	0.02065	0.05366	0.00022	-0.00037	0.0801031	-1.17654	0.573523	-0.404998	-1.47907
EMSC-20140711_0000028	GR	38.4475	23.7032	ALNA	39.148	23.8667			NF	14.6106	4.38	79.1745	604.69	8	0.03835	-0.03635	-5e-05	-6e-05	-0.137003	-1.16168	0.231637	-0.0764215	-1.34928
EMSC-20140711_0000028	GR	38.4475	23.7032	DION	38.0779	23.9331			NF	14.6106	4.38	45.7318	688.95	411	0.01094	0.09892	-3e-05	-0.00012	0.289437	-1.33532	0.276698	-0.472388	-1.46448
EMSC-20140711_0000028	GR	38.4475	23.7032	DLFA	38.4784	22.4956			NF	14.6106	4.38	105.195	900	511	-0.01822	-0.37187	0.00018	-0.00012	-0.562299	-1.76056	-0.021312	-0.640519	-1.84501
EMSC-20140711_0000028	GR	38.4475	23.7032	EFSA	39.5401	24.9886			NF	14.6106	4.38	164.625	477.937	20	-0.02705	0.04364	-2e-05	-7e-05	-1.02957	-2.07034	-0.428956	-0.886046	-1.99272
EMSC-20140711_0000028	GR	38.4475	23.7032	ITM	37.1787	21.9252			NF	14.6106	4.38	210.464	844.349	512	-0.01976	-0.08096	0.00025	3e-05	-1.42545	-2.46952	-0.897145	-1.3851	-2.27986
EMSC-20140711_0000028	GR	38.4475	23.7032	KYMI	38.6331	24.1001			NF	14.6106	4.38	40.224	703.927	266	0.09836	0.01122	5e-05	4e-05	0.450716	-1.04314	0.506315	-0.066563	-1.22433
EMSC-20140711_0000028	GR	38.4475	23.7032	LIA	39.8972	25.1806			NF	14.6106	4.38	205.433	464.17	45	0.04683	-0.0177	-3e-05	-1e-05	-1.2025	-2.24371	-0.670984	-1.22573	-2.25129
EMSC-20140711_0000028	GR	38.4475	23.7032	MNVA	36.6871	23.0373			NF	14.6106	4.38	204.355	883.644	11	0.09264	0.03325	-0.00021	-4e-05	-1.46395	-2.46039	-1.15253	-1.25684	-2.34059
EMSC-20140711_0000028	GR	38.4475	23.7032	NOAC	37.9738	23.7177			NF	14.6106	4.38	52.6838	434.005	96	-0.02322	0.00027	5e-05	6e-05	0.414653	-1.04285	0.583985	-0.398053	-1.3929
EMSC-20140711_0000028	GR	38.4475	23.7032	PLG	40.3733	23.4444			NF	14.6106	4.38	215.288	493.142	535	-0.05298	-0.01891	-1e-05	-1e-05	-1.38594	-2.51558	-0.920799	-1.41334	-2.5638
EMSC-20140711_0000028	GR	38.4475	23.7032	PSRA	38.5398	25.562			NF	14.6106	4.38	162.095	600	11	-0.00241	-0.0154	5e-05	-2e-05	-1.15442	-2.41398	-0.749065	-1.39467	-2.2839
EMSC-20140711_0000028	GR	38.4475	23.7032	TNSA	37.5394	25.1631			NF	14.6106	4.38	162.975	498.109	10	-0.00543	-0.03838	0	-6e-05	-0.837121	-2.28627	-0.800646	-1.27857	-2.30683
EMSC-20140711_0000028	GR	38.4475	23.7032	YDRA	37.3495	23.4653			NF	14.6106	4.38	123.867	693.523	86	-0.04435	0.15921	8e-05	-0.0002	-0.306871	-1.58897	0.0511093	-0.39729	-1.61684
EMSC-20140713_0000034	GR	40.9	21.2343	JAN	39.6562	20.8487			NF	7	4.1	142.123	435.911	515	0.01206	-0.02499	3e-05	1e-05	-1.25453	-2.49169	-0.809281	-1.4557	-2.24034
EMSC-20140713_0000034	GR	40.9	21.2343	KASA	39.7463	19.9354			NF	7	4.1	169.06	900	41	0.09573	-0.04553	-0.00012	1e-05	-1.54544	-2.66125	-1.00255	-1.48059	-2.42425
EMSC-20140713_0000034	GR	40.9	21.2343	PLG	40.3733	23.4444			NF	7	4.1	195.466	493.142	535	-0.05298	-0.01891	-1e-05	-1e-05	-1.83516	-2.97439	-1.36561	-1.80842	-2.75432
EMSC-20140715_0000041	TR	39.1513	29.0293	AKS	38.8785	27.8129			U	9.2593	4.1	109.382	541.408	331	0.04978	0.04567	0.00012	0.00025	0.0353353	-1.48882	0.26563	-0.37787	-1.39886
EMSC-20140715_0000041	TR	39.1513	29.0293	BASM	37.9194	30.035			U	9.2593	4.1	162.527	394.599	907	-0.02337	-0.02095	2e-05	-2e-05	-0.222945	-1.19266	0.249198	-0.0038235	-1.26993
EMSC-20140715_0000041	TR	39.1513	29.0293	DST	39.6041	28.6267			U	9.2593	4.1	61.0938	480.271	695	0.01607	0.0154	-4e-05	4e-05	0.299197	-1.00837	0.417878	0.0494285	-1.23585
EMSC-20140715_0000041	TR	39.1513	29.0293	ESKT	39.5212	30.8492			U	9.2593	4.1	161.827	649.232	1204	-0.07431	0.07917	0.0004	0.00011	-0.00287988	-1.2801	0.440774	-0.495232	-1.56097
EMSC-20140715_0000041	TR	39.1513	29.0293	GOMA	38.7077	27.9175			U	9.2593	4.1	108.082	636.467	132	0.07518	0.04702	-7e-05	-4e-05	0.112374	-1.14975	0.460275	-0.231208	-1.41755
EMSC-20140715_0000041	TR	39.1513	29.0293	GONE	40.0466	27.686			U	9.2593	4.1	152.17	440.139	144	-0.03639	0.04445	-0.00014	-2e-05	-0.0443491	-1.26179	0.260578	0.00324194	-1.20431
EMSC-20140715_0000041	TR	39.1513	29.0293	GPA	40.285	30.3167			U	9.2593	4.1	167.376	571.337	581	0.00917	-0.10213	-9e-05	-8e-05	-0.023526	-1.23549	0.353855	-0.233621	-1.3141
EMSC-20140715_0000041	TR	39.1513	29.0293	ORLT	40.0452	28.8914			U	9.2593	4.1	100.097	610.21	717	0.06117	-0.07403	0.00015	1e-05	0.283653	-1.01002	0.615145	0.0644454	-1.15347
EMSC-20140715_0000041	TR	39.1513	29.0293	OSMT	40.601	29.7			U	9.2593	4.1	171.057	875.613	779	-0.00248	-0.17182	-0.00014	-0.0001	-0.239152	-1.38009	0.243272	-0.299546	-1.52344
EMSC-20140715_0000041	TR	39.1513	29.0293	SHAP	39.0231	29.222			U	9.2593	4.1	21.9048	495.541	1009	-0.00572	-0.03743	-0.00018	0	2.19461	0.705187	2.31162	0.993885	0.0856469
EMSC-20140715_0000041	TR	39.1513	29.0293	SMAA	39.1005	28.9805			U	9.2593	4.1	7.04471	274.72	799	-0.00364	0.00311	0	0	2.25032	0.948162	2.55481	1.76708	0.659187
EMSC-20140716_0000035	TR	40.2611	26.2324	EFSA	39.5401	24.9886			U	13.5035	4	132.976	477.937	20	-0.02705	0.04364	-2e-05	-7e-05	-0.775603	-2.17191	-0.547482	-1.24087	-2.3155
EMSC-20140716_0000035	TR	40.2611	26.2324	PRK	39.2456	26.265			U	13.5035	4	112.947	439.853	104	-0.02311	-0.00716	4e-05	3e-05	-0.20885	-1.6061	0.146729	-0.648931	-1.88092
EMSC-20140716_0000035	TR	40.2611	26.2324	SMTH	40.4709	25.5304			U	13.5035	4	63.8839	900	356	-0.27133	-0.01567	-0.00034	0.00014	0.0698936	-1.68875	-0.296165	-1.49348	-2.29413
EMSC-20140716_0000035	TR	40.2611	26.2324	UKOP	41.1288	26.6322			U	13.5035	4	102.202	342.022	67	0.00357	-0.01594	0	0	0.148759	-1.0484	0.65462	-0.22415	-1.28545
EMSC-20140718_0000010	TR	38.2407	26.6152	PRK	39.2456	26.265			U	14.0662	4	115.799	439.853	104	-0.02311	-0.00716	4e-05	3e-05	-0.582572	-1.8204	-0.0507899	-0.885477	-2.05114
EMSC-20140718_0000010	TR	38.2407	26.6152	PSRA	38.5398	25.562			U	14.0662	4	97.6274	600	11	-0.00241	-0.0154	5e-05	-2e-05	-0.119453	-1.65272	0.0241695	-1.20548	-2.14468
EMSC-20140718_0000010	TR	38.2407	26.6152	GOMA	38.7077	27.9175			U	14.0662	4	124.695	636.467	132	0.07518	0.04702	-7e-05	-4e-05	0.200581	-1.14868	0.716907	-0.505534	-1.48525
EMSC-20140718_0000010	TR	38.2407	26.6152	GONE	40.0466	27.686			U	14.0662	4	221.018	440.139	144	-0.03639	0.04445	-0.00014	-2e-05	-0.499011	-1.77396	-0.0382064	-0.68688	-1.79622
EMSC-20140718_0000010	TR	38.2407	26.6152	KRBN	38.5936	26.5537			U	14.0662	4	39.6048	843.228	94	0.08041	0.05121	1e-05	8e-05	1.14392	-0.449362	1.23431	0.236374	-0.833669
EMSC-20140719_0000005	TR	38.6291	43.1721	ERCV	39.0198	43.3381			U	13.0402	4.1	45.762	343.689	1668	-0.01091	-0.00365	-2e-05	1e-05	0.746407	-0.447159	1.01434	0.511069	-0.146374
EMSC-20140803_0000071	TR	40.6006	29.1764	DST	39.6041	28.6267			U	7.5403	4	120.265	480.271	695	0.01607	0.0154	-4e-05	4e-05	-0.0125316	-1.20525	0.326155	-0.123908	-1.31257
EMSC-20140803_0000071	TR	40.6006	29.1764	GONE	40.0466	27.686			U	7.5403	4	140.564	440.139	144	-0.03639	0.04445	-0.00014	-2e-05	-0.0899534	-1.34349	0.0364658	-0.165205	-1.32819
EMSC-20140803_0000071	TR	40.6006	29.1764	GPA	40.285	30.3167			U	7.5403	4	102.68	571.337	581	0.00917	-0.10213	-9e-05	-8e-05	-0.23177	-1.4804	0.239372	-0.423209	-1.57598
EMSC-20140803_0000071	TR	40.6006	29.1764	ORLT	40.0452	28.8914			U	7.5403	4	66.3156	610.21	717	0.06117	-0.07403	0.00015	1e-05	0.262965	-1.05898	0.701135	-0.102831	-1.24206
EMSC-20140803_0000071	TR	40.6006	29.1764	OSMT	40.601	29.7			U	7.5403	4	44.2055	875.613	779	-0.00248	-0.17182	-0.00014	-0.0001	0.320046	-1.21001	0.365622	-0.526639	-1.27495
EMSC-20140803_0000071	TR	40.6006	29.1764	YUVA	40.391	31.6872			U	7.5403	4	213.578	629.043	1131	-0.04558	-0.07565	0.00018	2e-05	-1.13891	-2.04444	-0.611062	-0.8581	-1.44848
EMSC-20140808_0000022	GR	34.7481	24.8397	IMMV	35.4599	23.9802			SS	26.3567	4.5	111.254	795.072	188	-0.02677	0.13844	6e-05	-0.00015	-0.157137	-1.30288	0.368464	-0.112068	-1.37625
EMSC-20140808_0000022	GR	34.7481	24.8397	ANKY	35.867	23.3012			SS	26.3567	4.5	187.001	619.572	100	-0.0098	0.05556	-0.00012	-3e-05	-0.828636	-1.89229	-0.308404	-0.591578	-1.64063
EMSC-20140808_0000022	GR	34.7481	24.8397	GVD	34.8391	24.0874			SS	26.3567	4.5	69.4396	669.155	186	0.07511	0.04868	-4e-05	1e-05	0.266744	-0.867345	0.753109	0.250782	-1.11898
EMSC-20140808_0000022	GR	34.7481	24.8397	IACM	35.3058	25.0709			SS	26.3567	4.5	65.4893	395.328	66	-0.00016	0.02528	-0.00012	-1e-05	0.957791	-0.276239	1.64007	0.800766	-0.485305
EMSC-20140808_0000022	GR	34.7481	24.8397	IMMV	35.4599	23.9802			SS	26.3567	4.5	111.254	795.072	188	-0.02677	0.13844	6e-05	-0.00015	-0.166039	-1.31178	0.35956	-0.120971	-1.38515
EMSC-20140808_0000022	GR	34.7481	24.8397	ZKR	35.1147	26.217			SS	26.3567	4.5	132.007	745.462	201	0.10514	-0.01014	-0.00019	-4e-05	-0.377849	-1.52238	0.0103707	-0.362364	-1.46569
EMSC-20140811_0000067	TR	40.3662	25.8882	ALNA	39.148	23.8667			U	16.3345	4.1	219.554	604.69	8	0.03835	-0.03635	-5e-05	-6e-05	-2.00913	-2.90141	-1.76618	-1.629	-2.86283
EMSC-20140811_0000067	TR	40.3662	25.8882	LIA	39.8972	25.1806			U	16.3345	4.1	79.614	464.17	45	0.04683	-0.0177	-3e-05	-1e-05	-0.765886	-2.34834	-0.771771	-1.46641	-2.37249
EMSC-20140811_0000067	TR	40.3662	25.8882	PRK	39.2456	26.265			U	16.3345	4.1	128.689	439.853	104	-0.02311	-0.00716	4e-05	3e-05	-0.957573	-2.17457	-0.525509	-1.18863	-2.37186
EMSC-20140811_0000067	TR	40.3662	25.8882	SMTH	40.4709	25.5304			U	16.3345	4.1	32.4478	900	356	-0.27133	-0.01567	-0.00034	0.00014	0.280009	-1.50516	-0.245836	-1.25028	-1.95266
EMSC-20140811_0000067	TR	40.3662	25.8882	GONE	40.0466	27.686			U	16.3345	4.1	156.752	440.139	144	-0.03639	0.04445	-0.00014	-2e-05	-0.17084	-1.31687	0.388245	-0.281762	-1.47774
EMSC-20140811_0000067	TR	40.3662	25.8882	UKOP	41.1288	26.6322			U	16.3345	4.1	105.444	342.022	67	0.00357	-0.01594	0	0	0.383288	-0.802099	0.858426	-0.0859711	-1.22642
EMSC-20140813_0000023	TR	36.9196	27.6992	DIDI	37.3767	27.2398			U	9.0101	4.1	65.1249	315.946	47	-0.01473	0.00554	0	3e-05	0.822629	-0.496883	1.35046	0.351394	-0.544033
EMSC-20140822_0000012	GR	39.9286	23.4686	ALNA	39.148	23.8667			U	11.695	4.2	93.2661	604.69	8	0.03835	-0.03635	-5e-05	-6e-05	-0.355838	-1.52006	0.030441	-0.3622	-1.34509
EMSC-20140822_0000012	GR	39.9286	23.4686	DION	38.0779	23.9331			U	11.695	4.2	209.66	688.95	411	0.01094	0.09892	-3e-05	-0.00012	-1.42918	-2.31501	-0.93738	-1.07601	-2.09755
EMSC-20140822_0000012	GR	39.9286	23.4686	DLFA	38.4784	22.4956			U	11.695	4.2	181.745	900	511	-0.01822	-0.37187	0.00018	-0.00012	-1.60583	-2.4451	-1.32565	-1.32505	-1.9783
EMSC-20140822_0000012	GR	39.9286	23.4686	EFSA	39.5401	24.9886			U	11.695	4.2	136.966	477.937	20	-0.02705	0.04364	-2e-05	-7e-05	-1.23811	-2.33745	-0.832054	-1.15718	-2.03532
EMSC-20140822_0000012	GR	39.9286	23.4686	KYMI	38.6331	24.1001			U	11.695	4.2	153.961	703.927	266	0.09836	0.01122	5e-05	4e-05	-1.34381	-2.24968	-0.868865	-1.11236	-1.83217
EMSC-20140822_0000012	GR	39.9286	23.4686	PLG	40.3733	23.4444			U	11.695	4.2	49.4888	493.142	535	-0.05298	-0.01891	-1e-05	-1e-05	0.0435891	-1.63428	-0.112977	-0.993614	-1.86697
EMSC-20140822_0000013	GR	39.935	23.431	SRN	39.8789	20.0061	1512	MASW	NF	13.5	5.2	292.18	1512	78	-0.00912	-0.13807	-0.00012	-0.00011	-1.34764	-1.87448	-1.22677	-0.88454	-1.34558
EMSC-20140822_0000013	GR	39.935	23.431	ALNA	39.148	23.8667			NF	13.5	5.2	95.1473	604.69	8	0.03835	-0.03635	-5e-05	-6e-05	0.76092	-0.367483	1.10331	0.748803	-0.198389
EMSC-20140822_0000013	GR	39.935	23.431	DION	38.0779	23.9331			NF	13.5	5.2	211.002	688.95	411	0.01094	0.09892	-3e-05	-0.00012	-0.432237	-1.17257	-0.0485496	-0.0441186	-0.889912
EMSC-20140822_0000013	GR	39.935	23.431	DLFA	38.4784	22.4956			NF	13.5	5.2	180.909	900	511	-0.01822	-0.37187	0.00018	-0.00012	-0.78253	-1.51066	-0.479573	-0.36248	-0.988301
EMSC-20140822_0000013	GR	39.935	23.431	EFSA	39.5401	24.9886			NF	13.5	5.2	140.236	477.937	20	-0.02705	0.04364	-2e-05	-7e-05	-0.264485	-1.24676	0.205859	-0.0223849	-0.906807
EMSC-20140822_0000013	GR	39.935	23.431	JAN	39.6562	20.8487			NF	13.5	5.2	222.775	435.911	515	0.01206	-0.02499	3e-05	1e-05	-1.04249	-1.7074	-0.760802	-0.616097	-1.13893
EMSC-20140822_0000013	GR	39.935	23.431	KASA	39.7463	19.9354			NF	13.5	5.2	299.166	900	41	0.09573	-0.04553	-0.00012	1e-05	-1.35809	-1.87371	-1.08838	-0.861591	-1.31296
EMSC-20140822_0000013	GR	39.935	23.431	KVLA	40.937	24.3859			NF	13.5	5.2	137.643	748.058	74	0.06768	-0.09968	-0.0001	-0.00014	-0.0592972	-1.26875	0.331444	-0.249494	-0.878846
EMSC-20140822_0000013	GR	39.935	23.431	KYMI	38.6331	24.1001			NF	13.5	5.2	155.793	703.927	266	0.09836	0.01122	5e-05	4e-05	-0.408819	-1.22883	-0.113079	-0.0159612	-0.709698
EMSC-20140822_0000013	GR	39.935	23.431	LIA	39.8972	25.1806			NF	13.5	5.2	149.267	464.17	45	0.04683	-0.0177	-3e-05	-1e-05	-0.0578522	-1.07997	0.279881	0.0461435	-1.08063
EMSC-20140822_0000013	GR	39.935	23.431	MGNA	38.6561	20.7912			NF	13.5	5.2	267.989	411.497	65	0.03929	0.00081	-1e-05	8e-05	-1.3285	-1.8017	-1.13886	-0.87534	-1.27211
EMSC-20140822_0000013	GR	39.935	23.431	NOAC	37.9738	23.7177			NF	13.5	5.2	219.475	434.005	96	-0.02322	0.00027	5e-05	6e-05	-0.618524	-1.3763	-0.202959	-0.21848	-0.696745
EMSC-20140822_0000013	GR	39.935	23.431	PLG	40.3733	23.4444			NF	13.5	5.2	48.7479	493.142	535	-0.05298	-0.01891	-1e-05	-1e-05	0.590451	-0.900311	0.768827	0.0240239	-0.86486
EMSC-20140822_0000013	GR	39.935	23.431	PRK	39.2456	26.265			NF	13.5	5.2	254.639	439.853	104	-0.02311	-0.00716	4e-05	3e-05	-0.615123	-1.49361	-0.351358	-0.0981997	-1.27424
EMSC-20140822_0000013	GR	39.935	23.431	PSRA	38.5398	25.562			NF	13.5	5.2	240.305	600	11	-0.00241	-0.0154	5e-05	-2e-05	-0.703059	-1.71318	-0.266776	-0.663531	-1.29217
EMSC-20140822_0000013	GR	39.935	23.431	SMTH	40.4709	25.5304			NF	13.5	5.2	187.989	900	356	-0.27133	-0.01567	-0.00034	0.00014	-0.786802	-1.79512	-0.293631	-0.567615	-1.31427
EMSC-20140822_0000013	GR	39.935	23.431	TNSA	37.5394	25.1631			NF	13.5	5.2	305.804	498.109	10	-0.00543	-0.03838	0	-6e-05	-1.28164	-1.95903	-0.774134	-1.01594	-1.1207
EMSC-20140822_0000013	GR	39.935	23.431	FSK	38.4593	20.5623			NF	13.5	5.2	296.683	533.012	115	0.04709	0.06946	7e-05	2e-05	-1.15007	-1.64536	-1.08122	-0.747665	-0.887103
EMSC-20140822_0000013	GR	39.935	23.431	KRBN	38.5936	26.5537			NF	13.5	5.2	307.414	843.228	94	0.08041	0.05121	1e-05	8e-05	-0.54564	-1.27419	-0.401515	-0.116018	-0.999103
EMSC-20140822_0000013	GR	39.935	23.431	UKOP	41.1288	26.6322			NF	13.5	5.2	301.327	342.022	67	0.00357	-0.01594	0	0	0.17846	-0.626263	0.378649	0.629699	-0.180606
EMSC-20140822_0000013	GR	39.935	23.431	AC01	38.1662	20.5104			NF	13.5	5.2	319.795	600	27	-0.0344	-0.03932	2e-05	-6e-05	-0.901577	-1.68321	-1.04227	-0.835586	-1.19292
EMSC-20140822_0000013	GR	39.935	23.431	AC03	38.1641	20.5062			NF	13.5	5.2	320.228	600	6	0.00616	0.00973	-0.00012	-3e-05	-0.801008	-1.51839	-0.340923	-0.421731	-1.17482
EMSC-20140824_0000074	TR	37.65	30.72	KSL	36.1503	29.5856			NF	10	4.93	194.888	557.733	102	0.0315	0.04718	0.00018	-5e-05	-0.791496	-1.54574	-0.598102	-0.402465	-0.678934
EMSC-20140824_0000074	TR	37.65	30.72	AKS	38.8785	27.8129			NF	10	4.93	288.212	541.408	331	0.04978	0.04567	0.00012	0.00025	-0.596736	-1.38682	-0.273356	-0.289224	-0.892236
EMSC-20140824_0000074	TR	37.65	30.72	ALAN	36.557	32.0327			NF	10	4.93	168.291	822.401	99	-0.02044	-0.11354	5e-05	-7e-05	0.130586	-0.794688	0.491934	0.425945	-0.485267
EMSC-20140824_0000074	TR	37.65	30.72	BASM	37.9194	30.035			NF	10	4.93	67.2408	394.599	907	-0.02337	-0.02095	2e-05	-2e-05	1.28979	0.172979	1.53393	1.51092	0.154502
EMSC-20140824_0000074	TR	37.65	30.72	BOZY	36.1069	32.9763			NF	10	4.93	264.025	276.414	12	-0.01732	-0.00351	-2e-05	1e-05	-0.188595	-1.03669	0.049906	0.270833	-0.668999
EMSC-20140824_0000074	TR	37.65	30.72	DEMR	36.2365	29.9056			NF	10	4.93	173.035	861.281	250	0.0831	-0.16979	0	2e-05	-0.066367	-0.914516	0.216319	0.265218	-0.460976
EMSC-20140824_0000074	TR	37.65	30.72	DST	39.6041	28.6267			NF	10	4.93	283.317	480.271	695	0.01607	0.0154	-4e-05	4e-05	-0.461278	-1.23785	-0.189446	-0.00763175	-0.882195
EMSC-20140824_0000074	TR	37.65	30.72	KEMT	36.6037	30.5559			NF	10	4.93	117.249	453.978	14	0.03202	0.01149	-5e-05	-3e-05	0.533101	-0.654767	1.07266	0.367341	-0.507715
EMSC-20140824_0000074	TR	37.65	30.72	ORLT	40.0452	28.8914			NF	10	4.93	309.838	610.21	717	0.06117	-0.07403	0.00015	1e-05	-0.319817	-1.4177	0.131197	-0.172864	-0.806378
EMSC-20140824_0000074	TR	37.65	30.72	SEYD	37.4057	31.838			NF	10	4.93	102.263	382.318	1147	0.07099	0.03555	-0.00011	1e-05	0.465346	-0.403623	0.829174	0.761088	-0.122356
EMSC-20140824_0000074	TR	37.65	30.72	YUVA	40.391	31.6872			NF	10	4.93	316.025	629.043	1131	-0.04558	-0.07565	0.00018	2e-05	-0.696327	-1.41855	-0.607227	-0.342958	-0.665279
EMSC-20140828_0000047	IT	45.6557	10.6662	FUSIO	46.4549	8.66316			TF	10	3.6	178.283	900	1457	-0.10621	-0.13845	-0.00079	-0.0001	-1.09559	-2.31899	-0.625917	-1.35908	-2.4164
EMSC-20140828_0000047	IT	45.6557	10.6662	SBUA2	47.1591	9.47102	618	A	TF	10	3.6	190.634	618	464	0.08269	0.03832	-0.00018	0	-1.03857	-2.37171	-0.498834	-1.52615	-2.52441
EMSC-20140828_0000047	IT	45.6557	10.6662	SBUB	47.1459	9.43424	1563	A-SW	TF	10	3.6	190.736	1563	1294	0.28043	0.05451	0.00014	0.00019	-1.6264	-2.79808	-1.11758	-1.68892	-2.59133
EMSC-20140828_0000047	IT	45.6557	10.6662	SCEL	46.5074	9.85542			TF	10	3.6	113.486	498.506	1787	0.04807	0.00351	-0.0003	4e-05	-0.365417	-1.96285	-0.276205	-1.37971	-2.40138
EMSC-20140828_0000047	IT	45.6557	10.6662	SCUC	46.798	10.3038			TF	10	3.6	130.041	859.115	1209	-0.00138	0.00796	-5e-05	-0.00039	-0.411014	-1.93724	-0.0127618	-1.22121	-2.33797
EMSC-20140828_0000047	IT	45.6557	10.6662	SLOP	46.1638	8.79055	304	A	TF	10	3.6	155.723	304	205	0.01301	-0.04089	3e-05	-9e-05	-0.731656	-1.92808	-0.268334	-0.878288	-1.99835
EMSC-20140828_0000047	IT	45.6557	10.6662	SLTM2	46.9236	9.0009	620	A	TF	10	3.6	190.382	620	744	-0.19417	0.21697	-0.00024	-0.00037	-1.21443	-2.41346	-0.671655	-1.30468	-2.56719
EMSC-20140828_0000047	IT	45.6557	10.6662	STSP	46.6266	10.3332			TF	10	3.6	110.967	612.793	1757	0.00823	-0.1935	2e-05	-0.00056	-0.341982	-1.73396	0.064259	-1.01712	-2.23775
EMSC-20140828_0000047	IT	45.6557	10.6662	SVAM	46.6934	9.5261	486	A	TF	10	3.6	144.979	486	1258	0.1057	-0.33585	-0.00016	-0.00014	-0.633003	-1.9032	-0.167699	-1.18229	-2.27701
EMSC-20140828_0000047	IT	45.6557	10.6662	SZER	46.6975	10.0977			TF	10	3.6	123.835	900	1481	-0.12237	0.06531	-0.00015	-0.00034	-0.549059	-2.03937	-0.333053	-1.35962	-2.53318
EMSC-20140828_0000047	IT	45.6557	10.6662	VDL	46.4832	9.44956			TF	10	3.6	131.433	566.344	1955.53	0.04521	0.47823	-0.001	0.00205	-0.999166	-2.25298	-0.654744	-1.3392	-2.51494
EMSC-20140828_0000047	IT	45.6557	10.6662	FIVI	44.2393	10.1273			TF	10	3.6	163.106	421.035	343.417	-0.08093	0.02627	0.0007	0.0002	-1.20356	-2.41237	-0.94276	-1.13396	-2.15602
EMSC-20140828_0000047	IT	45.6557	10.6662	ACQ	44.6826	8.4624			TF	10	3.6	203.841	381.349	178.404	-0.0391	-0.03379	-5e-05	-0.0001	-0.703828	-2.29593	-0.581721	-1.58592	-2.57428
EMSC-20140828_0000047	IT	45.6557	10.6662	APR	46.1562	10.1578			TF	10	3.6	68.1546	421.45	1193.42	-0.29199	0.2194	-0.00229	-0.00425	-0.694955	-2.2313	-0.31034	-1.5121	-2.28508
EMSC-20140828_0000047	IT	45.6557	10.6662	BGR	43.8895	11.9913	829	P-MASW	TF	10	3.6	222.502	829	504.678	-0.03696	0.07772	0.00535	0.00026	-1.51489	-2.5599	-1.15626	-1.4649	-2.44371
EMSC-20140828_0000047	IT	45.6557	10.6662	BNO	45.9484	10.2904			TF	10	3.6	43.6797	468.035	388.136	0.13087	-0.02098	-0.00093	-0.00238	-0.122867	-1.6939	-0.114151	-1.05555	-2.03321
EMSC-20140828_0000047	IT	45.6557	10.6662	BRE	45.545	10.2795			TF	10	3.6	32.5055	511.25	781.562	-0.23721	0.06108	-0.0025	-0.0027	0.849081	-0.849027	0.586348	-0.270515	-1.3605
EMSC-20140828_0000047	IT	45.6557	10.6662	BVT	44.5304	9.7428			TF	10	3.6	144.604	457.182	803.187	-0.14414	0.08401	0.00203	0.00192	-1.1202	-2.28544	-0.650685	-1.24964	-2.31482
EMSC-20140828_0000047	IT	45.6557	10.6662	CME	43.9543	10.3012			TF	10	3.6	191.365	467.273	334.773	-0.0927	0.17489	0.00754	0.00061	-1.03856	-2.28726	-0.635346	-1.28383	-2.3203
EMSC-20140828_0000047	IT	45.6557	10.6662	CRP	44.7823	10.8703			TF	10	3.6	98.4245	212.769	26.706	0.05217	0.04587	-0.00068	-0.00032	-0.196193	-1.46354	-0.130195	-0.485542	-1.65385
EMSC-20140828_0000047	IT	45.6557	10.6662	FAZ	44.298	11.8907	292	ESAC-FK	TF	10	3.6	179.073	292	29.494	-0.03208	0.04296	0.0011	0.00255	-0.689377	-2.07478	-0.691685	-1.11571	-1.99878
EMSC-20140828_0000047	IT	45.6557	10.6662	GAI	45.6593	10.6163			TF	10	3.6	3.90122	446.948	348.038	-0.16828	-0.10685	0.00425	0.00188	1.84519	0.35715	1.98624	0.849145	-0.177646
EMSC-20140828_0000047	IT	45.6557	10.6662	MCS	43.9944	12.1074	568	P-MASW	TF	10	3.6	216.891	568	174.157	0.17822	0.03864	-0.00125	-0.00132	-1.07204	-2.62173	-0.961393	-1.69953	-2.76579
EMSC-20140828_0000047	IT	45.6557	10.6662	MLC	45.8079	10.8485	430	P-MASW	TF	10	3.6	22.0607	430	91.626	0.19641	-0.15809	-0.00011	0.00138	0.97334	-0.716995	0.831541	-0.316702	-1.29973
EMSC-20140828_0000047	IT	45.6557	10.6662	SPP	46.5725	12.709			TF	10	3.6	187.574	538.201	1272.09	-0.15773	0.09265	-0.00215	-0.00033	-0.717192	-2.10042	-0.498627	-1.15295	-2.36109
EMSC-20140828_0000047	IT	45.6557	10.6662	STF	43.9081	11.7945	486	MASW-RE	TF	10	3.6	213.748	486	600.674	-0.25047	-0.23181	-0.00026	0.001	-1.65258	-2.7593	-1.32936	-1.65201	-2.58576
EMSC-20140828_0000047	IT	45.6557	10.6662	ASOL	45.8003	11.9023			TF	10	3.6	97.2846	440.904	176.474	0.11058	-0.14179	0.00258	0.00239	-0.0690612	-1.50871	0.266603	-0.919281	-1.946
EMSC-20140828_0000047	IT	45.6557	10.6662	BDI	44.0624	10.597			TF	10	3.6	177.251	504.646	821.694	-0.21538	-0.18448	-0.00098	-0.00084	-1.31197	-2.6087	-0.94317	-1.53667	-2.56359
EMSC-20140828_0000047	IT	45.6557	10.6662	BOB	44.7679	9.4478			TF	10	3.6	137.31	557.922	929.946	0.26158	-0.16552	-0.00149	-0.00382	-1.02905	-2.3818	-0.822242	-1.19246	-2.20385
EMSC-20140828_0000047	IT	45.6557	10.6662	BORM	46.4694	10.3764			TF	10	3.6	93.201	582.356	1236.26	-0.17085	-0.18518	-0.00014	5e-05	-0.523637	-2.04651	-0.304366	-1.14151	-2.40302
EMSC-20140828_0000047	IT	45.6557	10.6662	CMPO	44.581	11.8054	116	P	TF	10	3.6	149.226	116	7.895	-0.01731	0.00627	3e-05	-0.00051	-0.688819	-1.78392	-0.458111	-0.543698	-1.63616
EMSC-20140828_0000047	IT	45.6557	10.6662	CNCS	45.606	10.217			TF	10	3.6	35.3625	393.024	213.925	-0.01103	-0.035	-0.0011	0	0.129355	-1.24283	0.670356	-0.615874	-1.55905
EMSC-20140828_0000047	IT	45.6557	10.6662	CRND	45.8361	12.0131			TF	10	3.6	106.421	416.764	152.743	-0.00596	-0.01555	-0.00086	0.00046	-0.176296	-1.77111	-0.0735886	-1.28402	-2.29774
EMSC-20140828_0000047	IT	45.6557	10.6662	FERS	44.9035	11.5406	184	CH	TF	10	3.6	108.056	184	7.519	-0.01149	0.03714	-0.00086	-0.00103	-0.125174	-1.42027	0.110191	-0.524063	-1.57029
EMSC-20140828_0000047	IT	45.6557	10.6662	FRE8	46.015	12.3552			TF	10	3.6	136.81	530.979	518.705	-0.3602	-0.03653	0.00312	-0.00045	-0.542304	-1.945	-0.179687	-1.07699	-2.2389
EMSC-20140828_0000047	IT	45.6557	10.6662	LEOD	45.4582	10.1234			TF	10	3.6	47.6269	392.25	87.208	0.00467	-0.0295	0.00119	0.00168	0.00547368	-1.18646	0.388815	-0.245356	-0.897281
EMSC-20140828_0000047	IT	45.6557	10.6662	MDI	45.7697	9.716			TF	10	3.6	74.8566	558.971	931.253	-0.60278	0.38544	0.01038	0.00128	-0.450678	-1.96556	-0.151416	-1.1679	-1.94769
EMSC-20140828_0000047	IT	45.6557	10.6662	MNTV	45.1495	10.7897	237	P	TF	10	3.6	57.1067	237	30.014	-0.07567	0.00607	0.00108	0.00154	-0.254936	-1.33074	0.0170168	-0.105831	-1.14732
EMSC-20140828_0000047	IT	45.6557	10.6662	MODE	44.6297	10.9492			TF	10	3.6	116.225	240.038	33.828	0.05655	0.04132	-0.00057	-0.00068	-0.209427	-1.22088	0.00660318	-0.0935942	-1.27504
EMSC-20140828_0000047	IT	45.6557	10.6662	MTRZ	44.3128	11.4248			TF	10	3.6	160.8	427.492	578.567	0.01429	0.05451	0.00485	0.00268	-1.09616	-2.16198	-0.75936	-1.10816	-1.88388
EMSC-20140828_0000047	IT	45.6557	10.6662	NDIM	44.8873	10.8987	208	ESAC	TF	10	3.6	87.3577	208	18	0.04882	0.01048	-0.00124	-0.00031	0.0041978	-1.55379	0.0334074	-0.711828	-1.66017
EMSC-20140828_0000047	IT	45.6557	10.6662	OPPE	45.3082	11.1724	264	P	TF	10	3.6	55.2313	264	22.79	-0.03814	-0.02095	-9e-05	0.00067	0.267676	-1.28184	0.15507	-0.212595	-1.16172
EMSC-20140828_0000047	IT	45.6557	10.6662	ORZI	45.4056	9.9307			TF	10	3.6	63.6844	251.796	79.687	-0.00735	-0.00213	0.00169	0.00054	-0.607705	-1.67729	-0.169948	-0.455608	-1.24069
EMSC-20140828_0000047	IT	45.6557	10.6662	ROVR	45.6468	11.0721			TF	10	3.6	31.5652	449.989	1310.17	0.06733	-0.11741	0.00062	-0.00056	0.944437	-0.599113	1.16142	-0.257681	-1.13654
EMSC-20140828_0000047	IT	45.6557	10.6662	SALO	45.6183	10.5243			TF	10	3.6	11.7902	484.105	536.902	-0.04726	0.162	0.00327	-0.00117	1.019	-0.341753	1.16364	0.565862	-0.587744
EMSC-20140828_0000047	IT	45.6557	10.6662	SANR	45.64	11.61	321	P-MASW	TF	10	3.6	73.3832	321	39.486	-0.03085	0.09512	-0.00038	-0.00046	0.235213	-1.28098	0.20595	-0.344652	-1.28225
EMSC-20140828_0000047	IT	45.6557	10.6662	SBPO	45.0511	10.9199			TF	10	3.6	70.0903	244.382	21.883	0.01604	-0.04663	-0.00097	0.00235	0.321779	-1.5185	-0.158372	-0.32771	-1.20818
EMSC-20140828_0000047	IT	45.6557	10.6662	SERM	45.01	11.2958			TF	10	3.6	87.0461	246.853	8.33	-0.02867	-0.01756	-0.00092	-0.00059	-0.507695	-2.10635	-0.307037	-1.33149	-2.28512
EMSC-20140828_0000047	IT	45.6557	10.6662	TREG	45.523	11.1606			TF	10	3.6	41.2037	403.939	337.676	-0.0024	-0.04591	-6e-05	-0.00038	0.955641	-0.562661	1.0641	-0.244406	-1.06207
EMSC-20140828_0000047	IT	45.6557	10.6662	VOBA	45.6429	10.504			TF	10	3.6	12.688	390.88	235.565	-0.02126	0.17851	0.0004	0.00016	1.11358	-0.438503	1.2009	0.0923373	-0.792063
EMSC-20140828_0000047	IT	45.6557	10.6662	ZOVE	45.4536	11.4876			TF	10	3.6	67.7886	498.245	373.619	0.16646	0.01113	0.00037	0.00079	-0.0195832	-1.59838	0.115675	-0.711031	-1.68723
EMSC-20140828_0000047	IT	45.6557	10.6662	TUE	46.4722	9.3473			TF	10	3.6	136.369	475.912	1908.55	0.19221	0.09561	0.00114	0.00059	-0.769205	-2.05718	-0.377136	-1.33223	-2.413
EMSC-20140828_0000047	IT	45.6557	10.6662	VLC	44.1594	10.3864			TF	10	3.6	167.833	457.239	511.88	0.09003	0.10514	-0.00221	-0.00028	-1.63337	-2.59008	-1.41436	-1.40727	-2.19355
EMSC-20140828_0000047	IT	45.6557	10.6662	PURA	46.4258	12.7419			TF	10	3.6	181.654	461.989	1414.26	-0.07026	-0.14642	0.00123	-7e-05	-1.03814	-2.39216	-0.691883	-1.15467	-2.37107
EMSC-20140904_0000009	TR	41.6945	32.496	MASR	41.7596	32.4658			TF	12.6657	4.07	7.66037	534.056	280	0.05105	0.09143	1e-05	0.00016	1.95793	0.196844	1.70418	1.0437	-0.279825
EMSC-20140904_0000009	TR	41.6945	32.496	SAFT	41.2398	32.6872			TF	12.6657	4.07	53.0108	461.068	415	0.00751	-0.04052	-9e-05	-1e-05	0.343097	-1.17843	0.586007	-0.342955	-1.423
EMSC-20140904_0000009	TR	41.6945	32.496	YUVA	40.391	31.6872			TF	12.6657	4.07	160.027	629.043	1131	-0.04558	-0.07565	0.00018	2e-05	-0.829018	-1.96227	-0.231245	-0.821223	-1.58792
EMSC-20140904_0000066	GR	40.1042	24.8807	ALNA	39.148	23.8667			SS	12.33	4.96	137.278	604.69	8	0.03835	-0.03635	-5e-05	-6e-05	0.245053	-0.835953	0.671676	0.427313	-0.858001
EMSC-20140904_0000066	GR	40.1042	24.8807	EFSA	39.5401	24.9886			SS	12.33	4.96	63.3933	477.937	20	-0.02705	0.04364	-2e-05	-7e-05	0.496155	-0.682146	0.861709	0.242951	-0.679164
EMSC-20140904_0000066	GR	40.1042	24.8807	KVLA	40.937	24.3859			SS	12.33	4.96	101.613	748.058	74	0.06768	-0.09968	-0.0001	-0.00014	0.28884	-0.966867	0.546037	0.0485674	-0.808972
EMSC-20140904_0000066	GR	40.1042	24.8807	KYMI	38.6331	24.1001			SS	12.33	4.96	176.799	703.927	266	0.09836	0.01122	5e-05	4e-05	-0.148566	-1.32144	0.364104	-0.122915	-1.30046
EMSC-20140904_0000066	GR	40.1042	24.8807	LIA	39.8972	25.1806			SS	12.33	4.96	34.3785	464.17	45	0.04683	-0.0177	-3e-05	-1e-05	0.922119	-0.397699	0.845607	0.527107	-0.491936
EMSC-20140904_0000066	GR	40.1042	24.8807	PLG	40.3733	23.4444			SS	12.33	4.96	125.529	493.142	535	-0.05298	-0.01891	-1e-05	-1e-05	-0.117593	-1.34118	0.2051	-0.0915595	-1.17891
EMSC-20140904_0000066	GR	40.1042	24.8807	PRK	39.2456	26.265			SS	12.33	4.96	152.147	439.853	104	-0.02311	-0.00716	4e-05	3e-05	-0.191764	-1.12219	0.036237	0.178006	-0.746418
EMSC-20140904_0000066	GR	40.1042	24.8807	PSRA	38.5398	25.562			SS	12.33	4.96	183.561	600	11	-0.00241	-0.0154	5e-05	-2e-05	-0.383158	-1.53547	0.130703	-0.390034	-1.30486
EMSC-20140904_0000066	GR	40.1042	24.8807	SMTH	40.4709	25.5304			SS	12.33	4.96	68.5585	900	356	-0.27133	-0.01567	-0.00034	0.00014	0.256383	-1.30114	0.0280725	-0.544309	-1.42053
EMSC-20140904_0000066	GR	40.1042	24.8807	UKOP	41.1288	26.6322			SS	12.33	4.96	186.637	342.022	67	0.00357	-0.01594	0	0	0.237703	-0.676576	0.684288	0.452158	-0.329474
EMSC-20140907_0000025	IT	44.1188	10.6717	FIVI	44.2393	10.1273			NF	17.5	4.1	45.4339	421.035	343.417	-0.08093	0.02627	0.0007	0.0002	0.311259	-1.17271	0.735814	-0.624223	-1.56643
EMSC-20140907_0000025	IT	44.1188	10.6717	ACQ	44.6826	8.4624			NF	17.5	4.1	186.37	381.349	178.404	-0.0391	-0.03379	-5e-05	-0.0001	-0.98418	-2.36488	-0.506302	-1.52193	-2.53341
EMSC-20140907_0000025	IT	44.1188	10.6717	BGL	43.9958	10.5769			NF	17.5	4.1	15.6312	442.868	392.983	0.03805	-0.12476	0.00731	-0.00075	0.747176	-0.672064	0.923352	0.0242135	-0.975795
EMSC-20140907_0000025	IT	44.1188	10.6717	BGR	43.8895	11.9913	829	P-MASW	NF	17.5	4.1	108.577	829	504.678	-0.03696	0.07772	0.00535	0.00026	-0.800545	-1.8874	-0.332399	-0.821519	-1.68986
EMSC-20140907_0000025	IT	44.1188	10.6717	BNO	45.9484	10.2904			NF	17.5	4.1	205.636	468.035	388.136	0.13087	-0.02098	-0.00093	-0.00238	-1.73875	-2.84545	-1.30946	-1.73402	-2.51906
EMSC-20140907_0000025	IT	44.1188	10.6717	BRB	43.9542	11.2129			NF	17.5	4.1	46.9718	419.147	375.29	0.06909	0.02793	0.00098	0.00148	0.545794	-0.840461	0.913697	-0.138619	-1.22955
EMSC-20140907_0000025	IT	44.1188	10.6717	BRM	44.1293	11.1177	410	P-MASW	NF	17.5	4.1	35.6174	410	834.587	-0.01211	-0.20062	-0.00688	0.00079	0.796366	-0.76059	0.695086	0.00722537	-1.19153
EMSC-20140907_0000025	IT	44.1188	10.6717	BRR	44.5064	9.9873			NF	17.5	4.1	69.445	445.347	816.694	0.02025	-0.11265	0.00064	0.0006	-0.223679	-1.58679	0.258066	-0.855471	-1.86739
EMSC-20140907_0000025	IT	44.1188	10.6717	BVT	44.5304	9.7428			NF	17.5	4.1	86.9172	457.182	803.187	-0.14414	0.08401	0.00203	0.00192	-0.476173	-1.8101	-0.0552985	-0.846079	-1.98667
EMSC-20140907_0000025	IT	44.1188	10.6717	CCT	43.3683	12.2346	316	P-MASW	NF	17.5	4.1	150.751	316	272.111	-0.01089	0.01171	-0.00027	-0.00113	-0.750244	-1.73211	-0.28415	-0.412491	-1.60582
EMSC-20140907_0000025	IT	44.1188	10.6717	CME	43.9543	10.3012			NF	17.5	4.1	34.81	467.273	334.773	-0.0927	0.17489	0.00754	0.00061	0.41528	-1.10758	0.500555	-0.609325	-1.45104
EMSC-20140907_0000025	IT	44.1188	10.6717	CNF	44.1105	10.4111			NF	17.5	4.1	20.8231	411.579	275.604	0.13366	-0.00705	-0.00088	-0.00199	0.671979	-0.819053	0.825365	-0.21961	-1.20717
EMSC-20140907_0000025	IT	44.1188	10.6717	CRP	44.7823	10.8703			NF	17.5	4.1	75.4432	212.769	26.706	0.05217	0.04587	-0.00068	-0.00032	-0.30155	-1.50101	-0.0741145	-0.356414	-1.16982
EMSC-20140907_0000025	IT	44.1188	10.6717	CRR	44.09	10.105			NF	17.5	4.1	45.3619	499.216	197.708	0.15241	-0.46719	-0.00473	-0.00054	0.462797	-1.14451	0.571115	-0.710173	-1.57768
EMSC-20140907_0000025	IT	44.1188	10.6717	CSN	44.137	12.2414	541	CH	NF	17.5	4.1	125.3	541	58.541	0.19394	0.14274	-0.00112	0.00133	-0.692841	-1.81171	-0.230546	-0.661301	-1.78784
EMSC-20140907_0000025	IT	44.1188	10.6717	CVM	42.9941	11.2823			NF	17.5	4.1	134.392	448.79	298.063	-0.12939	0.25081	0.00234	0.00235	-1.53224	-2.47504	-1.27062	-1.13721	-2.19181
EMSC-20140907_0000025	IT	44.1188	10.6717	FAZ	44.298	11.8907	292	ESAC-FK	NF	17.5	4.1	99.1861	292	29.494	-0.03208	0.04296	0.0011	0.00255	-0.322185	-1.54334	0.183451	-0.383862	-1.24177
EMSC-20140907_0000025	IT	44.1188	10.6717	FIE	43.8073	11.2944			NF	17.5	4.1	60.6949	429.306	306.433	0.17888	-0.04616	-0.00019	0.00199	-0.199383	-1.8212	-0.0266686	-0.809253	-1.95474
EMSC-20140907_0000025	IT	44.1188	10.6717	FVZ	44.2382	10.1311	509	DH	NF	17.5	4.1	45.111	509	387.233	-0.1156	-0.23354	0.0009	0.00153	0.376392	-1.11344	0.658318	-0.690793	-1.6132
EMSC-20140907_0000025	IT	44.1188	10.6717	GNU	42.8038	12.5701			NF	17.5	4.1	211.784	498.985	1040.52	0.21723	0.02676	0.00132	0.00071	-1.6846	-2.8884	-1.31756	-1.74021	-2.33418
EMSC-20140907_0000025	IT	44.1188	10.6717	MCS	43.9944	12.1074	568	P-MASW	NF	17.5	4.1	115.561	568	174.157	0.17822	0.03864	-0.00125	-0.00132	-0.871101	-2.10615	-0.462525	-0.901726	-1.94417
EMSC-20140907_0000025	IT	44.1188	10.6717	MNS	45.2517	11.7221	227	P-MASW	NF	17.5	4.1	150.882	227	7.964	0.00951	0.00603	0.00032	-0.00022	-0.891542	-2.15133	-0.396878	-1.26077	-2.13816
EMSC-20140907_0000025	IT	44.1188	10.6717	MRR	44.0641	11.6034			NF	17.5	4.1	74.6553	390.88	363.198	0.05657	-0.28433	-0.00109	4e-05	0.333435	-1.07029	0.542906	-0.564467	-1.49077
EMSC-20140907_0000025	IT	44.1188	10.6717	PAN	43.0058	12.1436			NF	17.5	4.1	171.406	435.261	288.84	-0.22729	0.09125	-0.00054	0.00034	-1.79047	-2.67899	-1.27574	-1.52017	-2.40125
EMSC-20140907_0000025	IT	44.1188	10.6717	PIT	43.9896	10.9446			NF	17.5	4.1	26.1091	485.369	481.167	-0.16012	0.16134	0.00519	0.00381	1.30999	-0.241837	1.44306	0.243355	-0.757594
EMSC-20140907_0000025	IT	44.1188	10.6717	PRT	44.1497	10.926			NF	17.5	4.1	20.5836	409.113	813.253	-0.01963	0.02156	0.00522	-0.00011	2.25028	0.582987	2.08357	0.82194	0.0392845
EMSC-20140907_0000025	IT	44.1188	10.6717	PVF	44.3331	10.8252			NF	17.5	4.1	26.7854	415.359	701.642	0.07605	0.01002	-0.00128	-0.00021	0.497261	-0.906409	0.656501	0.206114	-0.720231
EMSC-20140907_0000025	IT	44.1188	10.6717	PZS	44.1885	10.2886	453	DH	NF	17.5	4.1	31.5314	453	620.497	-0.10507	-0.02335	0.00194	-0.00088	0.56692	-0.89666	0.896926	-0.26202	-1.31798
EMSC-20140907_0000025	IT	44.1188	10.6717	SLD	43.8739	12.6739			NF	17.5	4.1	162.454	420.166	303.734	0.22256	-0.10877	-4e-05	0.0035	-0.847349	-1.76889	-0.492569	-0.60718	-1.61322
EMSC-20140907_0000025	IT	44.1188	10.6717	SLS	44.6324	9.406			NF	17.5	4.1	115.673	470.76	419.583	0.06465	-0.14282	-0.00253	-0.00022	-0.911357	-2.14129	-0.471077	-1.18471	-2.26697
EMSC-20140907_0000025	IT	44.1188	10.6717	SMP	44.0641	10.8037			NF	17.5	4.1	12.1718	447.013	981.037	0.04196	-0.12887	-2e-05	0.00924	1.76586	0.149349	1.67168	0.514548	-0.273241
EMSC-20140907_0000025	IT	44.1188	10.6717	SSU	44.507	10.7848			NF	17.5	4.1	44.097	422.105	393.608	-0.06311	-0.172	0.00116	0.00362	0.333049	-1.15739	0.590489	-0.205114	-1.29279
EMSC-20140907_0000025	IT	44.1188	10.6717	STF	43.9081	11.7945	486	MASW-RE	NF	17.5	4.1	92.7908	486	600.674	-0.25047	-0.23181	-0.00026	0.001	-0.678842	-1.87855	-0.227476	-0.862986	-2.02059
EMSC-20140907_0000025	IT	44.1188	10.6717	VGL	44.1107	10.2896			NF	17.5	4.1	30.5148	457.775	611.893	0.13301	0.10983	0.00558	0.00851	1.1839	-0.215757	1.63941	0.17723	-0.744612
EMSC-20140907_0000025	IT	44.1188	10.6717	VLM	44.3649	10.4662			NF	17.5	4.1	31.8864	450.309	682.391	-0.11233	-0.13418	0.00011	0.00059	0.197696	-1.29018	0.492957	-0.500343	-1.48986
EMSC-20140907_0000025	IT	44.1188	10.6717	ASOL	45.8003	11.9023			NF	17.5	4.1	210.551	440.904	176.474	0.11058	-0.14179	0.00258	0.00239	-1.02975	-2.27665	-0.631473	-1.0982	-1.99507
EMSC-20140907_0000025	IT	44.1188	10.6717	BAG8	45.8228	10.4664			NF	17.5	4.1	190.163	522.233	789.394	-0.26316	-0.18155	-0.00017	0.00155	-1.4888	-2.74305	-1.00648	-1.66873	-2.59109
EMSC-20140907_0000025	IT	44.1188	10.6717	BDI	44.0624	10.597			NF	17.5	4.1	8.65576	504.646	821.694	-0.21538	-0.18448	-0.00098	-0.00084	1.25831	-0.357972	1.04947	0.0522343	-0.72352
EMSC-20140907_0000025	IT	44.1188	10.6717	CAFI	43.3292	11.9663			NF	17.5	4.1	136.127	475.706	540.082	-0.14887	0.01784	-0.00076	0.00226	-1.4639	-2.57642	-1.04191	-1.42184	-2.38559
EMSC-20140907_0000025	IT	44.1188	10.6717	CMPO	44.581	11.8054	116	P	NF	17.5	4.1	103.767	116	7.895	-0.01731	0.00627	3e-05	-0.00051	-0.377656	-1.3984	-0.0244436	-0.133721	-1.19207
EMSC-20140907_0000025	IT	44.1188	10.6717	CNCS	45.606	10.217			NF	17.5	4.1	169.207	393.024	213.925	-0.01103	-0.035	-0.0011	0	-0.364407	-1.48236	0.03047	-0.868264	-1.81479
EMSC-20140907_0000025	IT	44.1188	10.6717	CPGN	43.8011	12.3205			NF	17.5	4.1	136.615	424.463	1400.91	-0.01805	0.0233	0.0011	-0.00113	-1.33527	-2.21464	-0.976437	-1.01277	-1.8285
EMSC-20140907_0000025	IT	44.1188	10.6717	CRMI	43.7956	10.9795			NF	17.5	4.1	43.5725	431.603	537.856	0.11787	0.09594	0.00208	0.00043	-0.0639826	-1.49402	0.227457	-0.523204	-1.5083
EMSC-20140907_0000025	IT	44.1188	10.6717	FERS	44.9035	11.5406	184	CH	NF	17.5	4.1	111.176	184	7.519	-0.01149	0.03714	-0.00086	-0.00103	-0.608546	-1.66976	-0.191989	-0.425362	-1.45397
EMSC-20140907_0000025	IT	44.1188	10.6717	FIR	43.7744	11.2551			NF	17.5	4.1	60.3987	334.035	70.107	0.06345	-0.03827	-0.00116	0.0017	0.125909	-1.36886	0.229697	-0.485054	-1.74872
EMSC-20140907_0000025	IT	44.1188	10.6717	LEOD	45.4582	10.1234			NF	17.5	4.1	155.092	392.25	87.208	0.00467	-0.0295	0.00119	0.00168	-1.13974	-2.12237	-0.79535	-1.03416	-1.49456
EMSC-20140907_0000025	IT	44.1188	10.6717	MDI	45.7697	9.716			NF	17.5	4.1	198.38	558.971	931.253	-0.60278	0.38544	0.01038	0.00128	-1.51646	-2.7053	-0.961188	-1.56839	-2.41211
EMSC-20140907_0000025	IT	44.1188	10.6717	MGAB	42.9126	12.1121			NF	17.5	4.1	177.419	411.579	483.14	-0.16097	-0.11163	0.00053	0.00103	-1.6413	-2.7023	-1.15085	-1.42325	-2.42941
EMSC-20140907_0000025	IT	44.1188	10.6717	MODE	44.6297	10.9492			NF	17.5	4.1	60.9407	240.038	33.828	0.05655	0.04132	-0.00057	-0.00068	0.029641	-0.968768	0.447272	0.140961	-0.221253
EMSC-20140907_0000025	IT	44.1188	10.6717	MTRZ	44.3128	11.4248			NF	17.5	4.1	63.7773	427.492	578.567	0.01429	0.05451	0.00485	0.00268	-0.104666	-1.29398	0.391868	-0.1912	-1.13882
EMSC-20140907_0000025	IT	44.1188	10.6717	MURB	43.263	12.5246			NF	17.5	4.1	176.769	454.824	825.704	0.03862	-0.02426	0.00294	-0.00013	-1.05649	-2.26834	-0.447479	-1.03891	-2.04492
EMSC-20140907_0000025	IT	44.1188	10.6717	NDIM	44.8873	10.8987	208	ESAC	NF	17.5	4.1	87.3289	208	18	0.04882	0.01048	-0.00124	-0.00031	-0.640394	-1.66838	-0.252692	-0.491017	-1.48139
EMSC-20140907_0000025	IT	44.1188	10.6717	ORZI	45.4056	9.9307			NF	17.5	4.1	154.582	251.796	79.687	-0.00735	-0.00213	0.00169	0.00054	-1.15589	-2.10649	-0.759611	-1.0652	-1.55938
EMSC-20140907_0000025	IT	44.1188	10.6717	OSSC	43.5236	11.2458			NF	17.5	4.1	80.6321	411.579	445.264	-0.02977	0.01338	0.00314	0.00227	-0.534487	-1.60647	-0.1169	-0.406725	-1.54613
EMSC-20140907_0000025	IT	44.1188	10.6717	SACS	42.8491	11.9097			NF	17.5	4.1	172.94	411.579	773.995	-0.0431	-0.11795	0.00187	0.00123	-2.09125	-2.92375	-1.64561	-1.66215	-2.31903
EMSC-20140907_0000025	IT	44.1188	10.6717	SALO	45.6183	10.5243			NF	17.5	4.1	167.141	484.105	536.902	-0.04726	0.162	0.00327	-0.00117	-1.20244	-2.31343	-0.776889	-1.2153	-1.92216
EMSC-20140907_0000025	IT	44.1188	10.6717	SANR	45.64	11.61	321	P-MASW	NF	17.5	4.1	184.593	321	39.486	-0.03085	0.09512	-0.00038	-0.00046	-0.921596	-2.21906	-0.641968	-0.921864	-1.94183
EMSC-20140907_0000025	IT	44.1188	10.6717	SBPO	45.0511	10.9199			NF	17.5	4.1	105.514	244.382	21.883	0.01604	-0.04663	-0.00097	0.00235	-0.655756	-1.77684	-0.211893	-0.685302	-1.5015
EMSC-20140907_0000025	IT	44.1188	10.6717	SERM	45.01	11.2958			NF	17.5	4.1	110.745	246.853	8.33	-0.02867	-0.01756	-0.00092	-0.00059	-1.26432	-2.41494	-0.748092	-1.24193	-1.97352
EMSC-20140907_0000025	IT	44.1188	10.6717	SFI	43.9048	11.847			NF	17.5	4.1	96.9544	495.868	540.654	-0.2643	0.11011	0.00058	-0.00174	-0.569672	-1.98826	-0.339343	-0.852294	-1.91923
EMSC-20140907_0000025	IT	44.1188	10.6717	TREG	45.523	11.1606			NF	17.5	4.1	160.83	403.939	337.676	-0.0024	-0.04591	-6e-05	-0.00038	-0.956826	-2.1736	-0.558491	-1.4081	-2.10451
EMSC-20140907_0000025	IT	44.1188	10.6717	VOBA	45.6429	10.504			NF	17.5	4.1	169.986	390.88	235.565	-0.02126	0.17851	0.0004	0.00016	-1.01032	-2.39564	-0.61774	-1.4884	-2.20856
EMSC-20140907_0000025	IT	44.1188	10.6717	ZCCA	44.3509	10.9765			NF	17.5	4.1	35.4325	442.879	707.609	-0.07196	-0.05112	-0.00136	0.00678	0.204305	-1.07684	0.718419	-0.0117275	-0.923616
EMSC-20140907_0000025	IT	44.1188	10.6717	ZOVE	45.4536	11.4876			NF	17.5	4.1	161.786	498.245	373.619	0.16646	0.01113	0.00037	0.00079	-1.03574	-2.2934	-0.654205	-1.1081	-2.0849
EMSC-20140907_0000025	IT	44.1188	10.6717	VLC	44.1594	10.3864			NF	17.5	4.1	23.21	457.239	511.88	0.09003	0.10514	-0.00221	-0.00028	0.450361	-1.01803	0.657371	-0.396196	-1.2372
EMSC-20140907_0000025	IT	44.1188	10.6717	0UM0	43.2858	12.3345			NF	17.5	4.1	162.618	415.622	366.727	-0.23565	0.27988	0.00118	-0.00284	-1.48916	-2.56845	-1.0889	-1.46198	-2.36877
EMSC-20140914_0000066	GR	37.1746	23.0499	KTHA	36.2566	23.0621			U	24.2456	4	102.083	516.09	273	0.05157	-0.0442	0.00023	0.00014	-0.333171	-1.85268	-0.0843803	-1.16601	-2.33494
EMSC-20140914_0000066	GR	37.1746	23.0499	ITM	37.1787	21.9252			U	24.2456	4	99.6443	844.349	512	-0.01976	-0.08096	0.00025	3e-05	-0.662851	-2.08041	-0.261873	-1.22901	-2.34613
[truncated: 13,780 more rows]
