# Supplementary material for: Ground motion prediction maps using seismic-microzonation data and machine learning
Source: Copernicus journal article supplement (doi:10.5194/nhess-22-947-2022), 2022-03-22
Supplement: Supplementary file 1 [file nhess-22-947-2022-supplement.zip]

Archive with 3 entries (3 files):
- nhess-2021-282-supplement-version2.pdf
- DATASET.xlsx
- nhess-22-947-2022-supplement-title-page.pdf
