# Supplementary material for: Ground motion prediction maps using seismic-microzonation data and machine learning
Source: Copernicus journal article supplement (doi:10.5194/nhess-22-947-2022), 2022-03-22
Supplement: Supplementary file 1 [file nhess-22-947-2022-supplement.zip › nhess-22-947-2022-supplement-title-page.pdf]

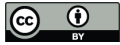

*Supplement of*

## **Ground motion prediction maps using seismic-microzonation data and machine learning**

**Federico Mori et al.**

*Correspondence to:* Federico Mori ([federico.mori@igag.cnr.it](mailto:federico.mori@igag.cnr.it))

- [nhess-22-947-2022-supplement-title-page.pdf](#)
- [DATASET.xlsx](#)
- [nhess-2021-282-supplement-version2.pdf](#)

The copyright of individual parts of the supplement might differ from the article licence.
